# Supplementary material for: Women choose romantic partners resembling their father in body odour
Source: Research Square preprint supplement (doi:10.21203/rs.3.rs-2531352/v1), 2023-01-31
Supplement: Supplementary file 1 [file 05280c55ed684f96e57c546d.xlsx]

## Sheet: ANALYTES (identity, peak areas)
Chemical identity and peak volumes of axillary sample analytes included in statistical analysis. tR,1 - retention time on the primary column, tR,2 - retention time on the secondary column, KI - Kovats retention index, Mw - molecular mass, quant mass - ion used for quantification, FL - father left axilla, FR - father right axilla, PL - partner left axilla, PR - partner right axilla											Peak volume (a.u.)
#	compound	class	diagnostic ions (m/z)	CAS number	tR,1 / s	tR,2 / s	KI	F-ratio	Mw	quant mass	01_FL	01_FR	01_PL	01_PR	02_FL	02_FR	02_PL	02_PR	03_FL	03_FR	03_PL	03_PR	04_FL	04_FR	04_PL	04_PR	05_FL	05_FR	05_PL	05_PR	07_FL	07_FR	07_PL	07_PR	13_FL	13_FR	13_PL	13_PR	14_FL	14_FR	14_PL	14_PR	15_FL	15_FR	15_PL	15_PR	16_FL	16_FR	16_PL
1	Nonane	hydrocarbon	–	111-84-2	410	1.15	917.362	6249.53	128	85	50.2375	16.7982	46.5536	19.5549	40.1231	21.6906	41.7232	14.7942	35.0357	1.24085	24.8261	21.2258	47.4884	28.1426	41.1071	53.7339	20.851	11.3797	28.7982	30.8876	29.7718	11.5385	45.6906	6.29341	27.4697	17.0492	12.6984	25.5859	48.0472	19.9574	33.4285	52.7106	41.9561	19.7099	46.1823	38.0353	58.2089	28.4948	55.6101
2	Unknown	–	–	–	410	1.68	917.823	87.0852	–	72	356.784	210.474	343.279	214.62	166.276	119.94	254.927	174.928	177.122	267.162	160.406	273.027	283.293	232.619	333.947	107.894	167.206	147.874	131.946	160.873	377.943	161.132	315.261	243.645	399.633	196.323	413.821	214.555	403.888	231.234	282.474	245.43	345.122	207.009	308.512	264.858	280.888	130.562	257.316
3	2(5H)-Furanone	lactone	–	497-23-4	410	2.35	918.405	6.49794	84	39	1031.43	150.107	120.583	25.7472	27.6503	3.17631	816.214	96.5017	43.682	107.795	67.1304	124.849	76.3837	35.4065	115.076	24.9681	58.6986	25.2282	9.10424	44.5316	406.633	107.812	183.864	677.761	893.669	48.6425	589.298	65.7833	205.589	40.2752	45.3812	128.558	359.049	24.6742	89.7467	121.035	64.4008	48.1235	68.8969
4	Hexane-2,5-dione	ketone	–	110-13-4	415	1.96	922.412	93.0904	114	42	1052.92	622.603	1176.34	476.638	931.651	381.388	970.578	393.54	978.702	1052.22	847.966	1017.05	873.4	621.345	1065.1	362.14	328.844	297.489	508.128	502.946	1331.94	595.479	1267.85	763.921	1262.81	598.194	1394.22	571.069	1451.15	747.183	1225.25	873.967	1191.72	702.928	1297.76	845.794	673.558	487.384	987.865
5	Cumene	aromatic	–	98-82-8	420	1.45	926.314	189.937	120	77	583.776	312.812	647.278	306.764	624.366	235.765	592.78	238.418	492.514	439.013	503.512	450.004	545.855	497.916	638.246	301.685	287.664	250.629	252.853	421.711	594.961	299.335	595.922	276.5	589.225	266.706	597.345	255.286	776.09	328.5	701.264	439.293	552.726	361.497	663.478	416.979	569.504	419.993	608.884
6	α-Pinene	terpene	–	80-56-8	435	1.29	939.212	466.941	136	93	195.418	95.2635	227.438	94.7804	267.55	115.473	346.481	80.3147	212.834	173.365	356.291	242.189	184.218	141.679	200.283	88.7538	362.887	139.886	99.3586	132.438	243.387	117.164	294.228	89.2688	269.609	79.6587	280.17	90.1417	435.695	115.425	357.299	171.166	215.336	181.456	308.199	171.399	182.277	161.874	236.202
7	Unknown	–	–	–	435	1.48	939.377	43.9304	–	74	165.191	274.89	254.454	160.655	193.669	131.486	118.087	112.943	61.7718	185.968	97.1703	143.103	400.075	442.616	365.611	202.749	120.839	364.564	134.125	417.889	192.024	204.226	225.345	188.524	45.2369	94.5203	98.5695	92.4963	106.45	121.768	78.346	164.456	78.786	139.523	124.775	130.218	732.791	75.1856	720.315
8	Unknown	–	–	–	435	1.76	939.621	26.0946	–	31	202.581	186.958	244.095	170.51	181.771	162.333	148.52	100.164	119.197	189.137	199.226	154.135	363.521	495.742	334.583	171.358	82.6715	273.646	127.627	452.473	227.097	179.171	244.258	156.572	212.243	93.8629	156.939	91.32	130.137	126.671	146.569	176.343	136.315	113.613	134.145	166.89	1420.37	853.593	786.125
9	Unknown	–	–	–	435	2	939.829	42.5564	–	59	227.622	233.351	270.679	168.717	154.906	104.939	186.423	107.26	79.4917	184.595	102.876	181.039	360.255	421.192	260.42	146.766	96.4624	223.607	163.418	374.025	297.888	196.319	258.53	168.782	33.9521	139.071	65.8969	139.246	162.381	152.723	122.554	177.013	135.899	157.693	163.286	176.629	526.625	92.4283	567.86
10	Unknown	–	–	–	435	2.2	940.003	35.257	–	39	460.123	221.926	272.357	144.445	174.068	131.12	293.214	115.959	97.8164	183.055	58.1783	190.641	301.556	370.583	371.733	209.199	132.431	196.586	115.536	400.863	272.679	144.965	184.706	261.923	624.345	103.997	367.489	149.231	177.727	149.77	113.701	175.452	127.812	182.761	157.387	203.794	498.412	129.924	424.726
11	Unknown	–	–	–	445	1.11	947.747	45.4339	–	45	2424.74	1297.04	2512.29	667.563	1736.02	625.995	1590.9	632.374	1042.67	636.685	1166.27	860.329	2916.55	1926.53	2754.17	1214.23	1015.71	1230.06	1585.79	2179.97	2159.39	1161.79	2101.5	1053.37	1083.86	552.901	991.394	521.2	1503.34	585.346	1320.12	769.176	1175.71	578.781	1326.97	633.654	3764.65	920.785	4101.14
12	Unknown	–	–	–	445	1.95	948.477	65.8841	–	43	1925.29	1849.41	2510.02	1038.99	1259.67	703.303	1459.5	835.931	1056.72	1335.83	1038.78	1711.17	2488.47	2544.9	1408.39	922.488	970.668	1513.56	1434.13	2501.96	2366.53	1482.99	2257.63	745.524	396.802	994.601	324.888	859.478	1557.69	1494.33	1360.49	1662.92	1303.37	1293.85	1735.06	1612.81	3157.02	989.951	3023.26
13	3-Hexene-2,5-diol	alcohol	–	7319-23-5	460	1.62	961.227	45.5616	116	79	161.569	166.511	168.964	150.452	191.874	130.37	145.628	103.662	81.4371	180.372	107.013	179.076	290.347	417.146	245.747	148.397	80.2335	257.677	81.466	383.334	174.184	149.78	177.197	116.151	80.3506	79.0679	111.725	94.5522	133.916	190.43	114.448	178.836	110.554	192.597	123.866	207.32	450.807	144.643	395.669
14	Mevalonolactone	lactone	–	19022-60-7	460	1.77	961.357	43.2634	130	43	3501.98	3593.38	3883.82	1418.4	2180.51	1040.8	1987.06	1236.47	1489.02	2223.87	1603.66	2130.77	4577.87	7290.16	5549.95	2849.2	1177.8	3638.53	1515.11	6258.45	2972.78	2078.69	2462.35	2307.46	1844.24	1463.37	2366.21	1285.86	2727.61	1542.44	1949.53	1898.13	2014.75	1495.94	2255.13	1808.83	6762.52	1364.07	8245.97
15	Hexanoic acid	carboxylic acid	–	142-62-1	465	1.56	965.52	23.4288	116	42	1309.07	614.973	870.707	385.342	544.377	210.674	615.46	216.527	305.158	516.862	1091.64	950.1	993.985	1235.96	1490.39	783.125	4727.34	940.347	481.838	1001.47	759.432	475.772	656.766	865.559	1119.2	218.375	1316.42	301.729	684.214	353.172	523.123	487.375	1272.9	334.279	975.957	646.203	5595.13	4315.73	1726.04
16	Benzaldehyde	aldehyde	–	100-52-7	465	1.94	965.851	24.5301	106	50	148.027	100.204	203.61	90.6496	175.055	84.7855	192.491	55.5267	222.821	339.452	498.828	353.353	133.939	87.2455	161.929	48.4345	481.496	260.72	74.155	67.6338	361.89	164.981	331.57	154.337	253.522	111.67	253.5	94.2495	247.053	137.577	341.936	206.269	284.52	257.223	261.51	189.878	922.017	1306.64	227.644
17	Unknown	–	–	–	465	2.1	965.99	27.453	–	43	1129.57	551.996	1239.95	483.337	748.852	323.791	1027.52	317.277	1083.82	1001.12	976.272	885.708	1056.54	654.357	987.554	285.502	617.618	393.943	570.679	494.699	1385.36	649.819	1271.77	747.645	1119.53	632.191	1220.01	634.853	1222.93	739.896	1220.8	935.645	1063.55	686.165	1505.24	819.916	1009.5	1121.28	1277.78
18	Unknown	–	–	–	470	2.01	970.257	6.48635	–	44	58.4941	3.21335	20.0362	–	22.5236	15.7545	63.0878	7.3961	36.9953	6.36993	18.3167	22.9412	–	45.2728	77.1989	8.6161	64.0186	11.1397	7.51919	33.4604	33.5868	3.69683	–	268.591	319.854	9.01686	524.632	–	105.742	–	–	–	35.09	10.012	13.7818	25.2857	140.627	82.2768	–
19	Unknown	–	–	–	480	2.56	979.426	89836.7	–	57	21.1936	8.55201	19.9556	11.3411	6.96873	6.92016	15.9499	17.4615	10.99	12.1415	11.4358	14.0224	15.3094	17.0679	32.8164	2.88046	3.99202	15.9108	6.77578	–	22.5642	14.6846	–	10.7596	32.6221	–	32.7532	20.4101	–	–	2.42537	18.2322	37.6196	21.9073	4.19051	14.3513	11.3757	12.1297	22.2402
20	Unknown	–	–	–	485	1.82	983.129	51.1666	–	29	2177.08	1916.14	2512.9	1207.9	1589.64	802.603	1346.48	918.906	924.376	1284.26	980.424	1320.36	2962.02	3174.17	3337.91	1183.17	491.71	2017.36	1005.93	3454.06	2018.23	1480.98	1618.93	1582.29	1094.68	733.007	1365.06	860.715	1445.49	866.812	1170.49	1065.86	1110.19	928.001	1296.06	1152.09	3854.56	788.119	4853.58
21	2-Pentylfuran	heterocyclic	–	3777-69-3	490	1.49	987.187	20.2542	138	69	120.194	57.1344	56.1856	28.8594	35.674	5.37991	77.4471	26.3613	39.314	73.6028	32.4884	148.521	69.5283	72.0186	96.6214	113.339	166.719	74.5376	31.8749	73.6842	99.5988	60.1923	46.9335	141.528	732.082	52.3806	442.575	78.3828	104.226	40.4356	50.4644	46.7764	240.844	37.8891	67.7159	63.845	108.216	133.579	51.9929
22	Unknown	–	–	–	490	1.57	987.257	32.4707	–	43	1168.8	567.256	951.443	505.785	531.17	262.668	689.839	340.1	342.302	976.927	792.887	807.975	1374.71	927.876	1058.72	502.305	3527.14	1243.44	344.067	719.034	1023.86	639.576	672.856	735.462	823.72	234.242	2177.39	574.919	1394.07	906.043	544.218	487.005	643.021	458.187	1052.39	672.232	1350.7	2253.71	906.717
23	Unknown	–	–	–	490	1.63	987.309	26.9256	–	55	503.832	514.85	603.548	284.12	538.301	233.388	399.034	213.136	207.394	307.126	288.597	311.383	948.307	1131.76	707.252	391.637	1185.75	1362.07	252.507	1284.94	527.669	341.425	467.53	352.921	210.8	119.078	542.689	258.987	412.226	308.973	287.142	238.127	292.721	235.031	488.357	269.431	1361.39	601.258	1363.13
24	Maleimide	heterocyclic	–	541-59-3	495	2.21	992.159	8.94975	97	69	241.142	22.6409	54.5961	8.59614	28.7811	0.0838323	136.639	6.81104	29.0872	39.4165	13.7518	70.3433	9.05788	39.1697	160.671	56.8989	62.7616	21.1224	19.69	19.466	90.3593	40.6094	56.3489	212.895	814.029	47.1856	550.226	35.7591	64.7425	15.5771	20.2927	34.1654	148.211	24.9315	63.165	43.1007	47.2402	44.7844	87.4897
25	Unknown	–	–	–	505	1.25	1000.02	290100	–	57	175.183	75.662	144.185	97.7638	134.249	64.0592	165.797	67.3267	106.293	244.849	123.967	274.096	118.88	98.3347	140.536	111.955	170.517	71.2548	118.937	63.2369	188.182	83.0845	177.458	95.9933	157.531	52.6806	225.725	77.6733	189.977	109.97	127.61	133.043	141.789	189.686	167.823	158.909	112.277	137.831	129.768
26	Unknown	–	–	–	505	1.82	1000.51	70.487	–	58	382.931	237.758	404.68	183.069	344.724	141.696	324.128	142.566	390.042	488.252	498.617	469.973	272.278	272.228	175.902	99.8277	48.6041	125.343	111.675	179.667	475.065	239.863	488.896	237.153	120.604	242.257	71.2142	174.413	606.643	290.226	539.104	356.195	460.842	290.081	554.536	313.237	180.498	413.345	301.715
27	Unknown	–	–	–	510	1.74	1004.79	47.5301	–	57	1110.94	404.591	568.419	101.105	273.013	64.3127	456.526	128.991	150.227	191.13	402.488	206.892	179.576	654.466	973.22	544.021	67.6454	93.9581	91.5981	127.039	581.679	301.134	499.81	307.116	302.264	127.182	233.193	102.597	512.023	107.418	246.503	118.442	168.894	120.005	322.501	132.389	187.47	192.052	232.357
28	Unknown	–	–	–	515	1.67	1009.07	22.1888	–	71	49.9434	37.2888	44.185	32.1331	43.022	44.3285	50.1457	34.3839	85.7811	96.3553	647.896	117.532	37.2681	48.9055	53.8589	25.3912	34.9741	35.344	26.4597	14.7793	79.6387	30.3806	44.2794	30.9195	81.9175	27.9543	90.7359	31.6574	83.2941	49.2788	86.6336	53.2096	74.32	88.3533	155.572	74.4484	82.976	122.343	44.6314
29	Unknown	–	–	–	535	1.53	1026.33	17.3682	–	43	342.165	218.504	346.574	171.044	178.351	145.478	205.78	98.9694	191.158	703.14	514.709	694.775	297.238	335.029	412.387	245.815	5489.32	1085.96	220.028	203.076	644.019	249.468	296.158	197.375	281.011	90	346.983	129.698	289.297	175.191	245.284	263.401	262.361	378.945	309.038	379.77	372.137	571.18	234.001
30	Limonene	terpene	–	138-86-3	540	1.47	1030.63	9.30388	136	53	92.316	73.6833	119.14	71.5516	53.7452	34.2502	74.668	47.8589	53.022	249.914	76.0912	256.554	134.846	112.463	113.655	64.4125	389.762	169.509	57.6174	52.1366	150.468	74.5216	63.1803	44.9627	70.9182	23.8057	88.4637	30.4802	94.0552	80.4751	76.0541	79.9148	111.099	188.448	82.0572	162.127	72.6853	69.0898	53.7764
31	(2E)-3-Methyl-2-hexenoic acid	carboxylic acid	–	27960-21-0	545	1.69	1035.16	16.688	128	85	90.2628	22.7545	62.3948	16.6809	27.7066	21.5522	54.1504	20.709	36.6241	38.255	33.6798	36.202	38.3327	40.501	52.7399	19.6145	36.6281	31.515	34.6534	19.0985	60.3633	36.9208	44.3074	54.7838	234.196	20.8201	183.951	9.93413	63.652	25.6094	38.666	28.5549	43.1377	6.77911	53.7365	30.5536	33.01	30.7725	38.0368
32	Benzyl alcohol	aromatic	–	100-51-6	545	2.03	1035.46	16.6023	108	79	50.8268	37.7396	37.2619	30.2116	49.5879	15.4538	12.5888	10.7332	42.3699	104.494	64.8756	101.223	19.242	24.4606	37.3644	14.894	308.498	102.177	21.6962	32.4715	93.9521	68.1852	290.891	114.434	104.314	3.49368	76.0896	28.1444	58.9388	27.477	71.0366	78.8144	181.411	153.579	88.2255	74.0885	89.8237	201.609	59.9202
33	Unknown	–	–	–	550	1.63	1039.46	14.9949	–	45	752.112	145.687	174.641	36.2284	64.8596	25.2839	358.074	62.1816	69.5835	72.3726	95.9242	119.874	73.2096	168.301	284.911	143.864	185.81	56.8456	76.1351	50.7818	340.798	133.104	163.931	659.001	1755.51	52.5343	801.209	26.5915	243.099	31.1987	73.6101	48.7731	112.074	34.9401	113.338	72.4977	107.055	98.7645	98.68
34	4-Methyl-hex-5-en-4-olide	lactone	–	1073-11-6	550	2.15	1039.91	17.1645	126	83	96.4611	12.1524	35.6605	16.0459	27.9042	18.4848	53.9111	5.52029	22.7804	63.9754	38.1956	57.4511	27.3293	12.2874	31.6536	22.5602	235.011	33.4251	23.5921	18.3273	41.399	17.3262	37.2442	13.4325	54.7292	17.7904	137.325	17.7008	90.4917	58.0472	45.9415	14.1905	46.4105	13.0426	78.1348	59.5154	83.0605	137.812	13.0503
35	2,2,5,5-Tetramethyltetrahydrofuran	heterocyclic	–	15045-43-9	565	1.73	1052.58	23.4159	128	70	227.152	99.833	163.24	132.866	90.9335	83.9687	325.59	49.1229	112.356	197.895	137.606	139.634	66.3626	91.8856	114.686	60.513	108.422	86.491	63.4651	53.2173	63.0348	15.4704	57.8363	68.7904	360.537	35.8397	220.106	44.0073	427.179	38.682	236.373	45.165	213.728	75.0124	258.837	64.0124	57.3934	191.764	36.155
36	Unknown	–	–	–	565	1.75	1052.6	14.7589	–	113	105.203	45.4198	52.2023	41.5469	38.2748	23.5327	128.437	22.004	35.7418	65.9166	44.4318	50.888	11.4223	38.992	61.8645	16.1424	33.6707	36.3247	5.59348	26.5336	25.6959	3.48769	30.6837	17.7858	157.578	19.31	128.585	17.4835	224.25	21.4105	111.134	26.0173	105.9	51.4797	101.965	38.5057	2.85518	26.3568	24.8237
37	gamma-Caprolactone	lactone	–	695-06-7	565	2.27	1053.05	5.63946	114	41	46.9623	16.3169	29.8414	11.4757	54.6123	33.3506	68.0486	16.6223	53.774	88.1426	342.697	119.288	3.46374	47.2768	66.5496	34.4411	589.279	117.379	11.5755	21.4677	60.9556	38.5695	72.234	28.0406	73.2018	17.0716	70.646	28.6545	79.2732	25.8623	101.089	53.5223	94.4278	60.8383	77.5981	45.572	522.761	919.081	68.7811
38	Unknown	–	–	–	575	1.59	1061.15	24.2189	–	45	518.079	171.892	191.554	96.3067	74.5516	51.9255	194.197	49.2588	72.1929	89.9335	93.5961	132.375	122.395	279.162	430.847	194.488	807.42	129.734	126.084	69.0133	208.945	117.201	131.585	256.887	556.183	58.2954	587.985	65.8714	249.358	61.6174	92.666	94.7711	242.762	36.0483	135.918	104.454	567.557	692.432	197.274
39	Heptanoic acid	carboxylic acid	–	111-14-8	585	1.55	1069.81	19.2121	130	42	185.44	83.2668	120.441	66.5569	71.4152	40.5768	110.035	32.8576	83.1783	156.681	195.172	144.754	95.0712	146.911	140.269	97.491	736.87	161.474	91.1699	57.0073	107.182	64.314	96.8558	98.9015	265.179	38.5343	268.233	60.6906	187.1	70.4615	90.7405	84.998	107.925	60.5669	119.251	81.6993	230.853	735.801	106.721
40	–	–	–	–	585	1.91	1070.12	11.5326	–	108	98.1104	4.80727	47.5349	14.8796	20.652	–	94.4311	4.95343	46.1566	38.2322	33.7179	42.2954	12.7944	6.85096	36.4589	14.2879	41.2721	–	25.2229	6.97538	81.4963	17.6525	37.7053	40.5589	240.908	17.4837	202.574	36.9627	112.809	47.1297	32.2428	36.3577	103.148	41.1317	79.6789	45.7412	28.1171	102.529	33.147
41	Acetophenone	aromatic	–	98-86-2	585	2.07	1070.26	6.28557	120	120	27.1238	23.0785	5.92304	12.4491	22.4438	6.48082	38.4764	6.82635	18.0938	35.2129	50.9162	24.5068	30.8423	8.40674	40.0803	19.4422	453.156	74.2555	38.0151	6.0652	144.987	45.338	58.0328	63.173	163.657	17.3925	47.6913	29.7073	58.1111	19.827	37.6407	41.7598	62.6627	43.4336	82.9508	24.5908	235.76	433.929	32.1599
42	2-Nonanone	ketone	–	821-55-6	605	1.61	1087.24	8.90609	142	111	34.4653	13.8953	61.7352	39.5691	28.9044	21.7232	40.8882	15.0898	45.6228	72.016	49.7119	40.3666	6.05323	48.7547	9.76868	40.8829	216.321	54.6979	25.544	32.9015	46.3846	32.1098	58.2382	45.6687	41.802	10.2375	96.9667	49.3976	47.149	27.9361	62.5562	24.9601	29.3513	33.3426	15.8902	47.1238	79.5817	56.7525	74.5729
43	Undecane	hydrocarbon	–	1120-21-4	620	1.31	1100.02	228804	–	57	378.277	180.63	297.81	331.291	159.665	129.466	204.962	115.642	166.009	878.524	188.44	767.395	130.305	160.469	162.572	132.278	401.655	174.698	291.141	103.379	265.376	186.809	343.709	186.504	258.892	108.637	309.689	154.101	332.558	194.857	286.212	286.558	208.189	504.75	347.802	409.95	105.912	282.667	122.383
44	Nonanal	aldehyde	–	124-19-6	625	1.59	1104.82	13.4248	142	54	93.4185	52.4424	72.754	41.4569	34.1717	18.5961	87.988	55.2728	48.6913	172.374	116.142	156.006	36.5183	34.2914	85.6857	33.7139	172.522	91.4132	35.837	16.493	87.1903	39.7585	81.4498	40.8483	57.9188	44.7425	90.4666	65.8623	196.434	77.7678	107.33	83.1393	89.2085	110.391	173.037	62.4161	105.754	204.905	74.46
45	Unknown	–	–	–	635	1.9	1114.19	4.67416	–	43	169.139	55.1444	112.035	56.1317	37.5422	36.9288	104.448	17.1428	65.8084	146.345	115.559	86.7498	188.051	103.963	408.138	132.231	1574.68	336.834	88.242	38.4391	131.788	61.9049	95.3746	93.9295	156.625	42.4285	502.496	67.4019	241.798	136.806	81.7192	55.5263	73.845	55.6228	111.613	91.8563	369.273	440.81	156.314
46	Unknown	–	–	–	650	1.59	1127.54	28.4988	–	55	61.5882	52.8044	56.0432	56.5662	47.35	35.5784	81.3049	44.4584	76.6574	186.468	78.7208	134.005	33.8758	111.722	68.9607	38.8993	271.073	104.194	26.369	48.9168	108.138	63.666	98.9171	81.2482	113.895	24.2661	76.5819	28.7445	144.059	61.5928	94.6137	47.3174	44.0854	105.275	52.1317	68.4617	80.6241	118.325	93.6993
47	Unknown	–	–	–	655	1.9	1132.36	8.37596	–	128	12.3426	7.37725	14.8743	14.6254	2.39587	1.34464	–	6.35729	19.2621	–	–	11.2169	2.29652	14.7272	7.167	3.96873	58.8226	72.1051	13.2409	8.34265	–	22.568	13.65	5.96274	2.54824	–	12.1071	4.54158	4.71834	6.51364	–	12.1688	12.0279	6.45199	7.59548	1.39344	–	16.3965	14.0745
48	Unknown	–	–	–	675	1.37	1150.06	9.55667	–	43	146.102	82.8037	141.198	47.6534	86.0825	40.9168	176.06	51.4398	91.9947	122.051	95.2176	105.106	109.514	133.796	137.287	114.646	149.387	102.142	137.107	94.1956	143.342	64.7538	127.818	119.09	765.84	52.8377	2269.33	73.2273	134.202	90.5289	111.152	101.283	168.064	89.5323	143.892	111.721	133.713	174.383	108.577
49	Octanoic acid	carboxylic acid	–	124-07-2	685	1.61	1159.37	18.2532	144	83	121.358	18.7591	52.1663	35.9434	7.27545	8.39388	42.8343	28.3047	21.7871	28.2703	27.9736	18.1856	71.9148	85.7771	77.5928	53.1464	103.88	71.8915	25.5822	29.6161	37.5846	22.0625	30.6642	35.7818	49.0093	13.0419	67.8955	22.6769	88.0472	21.4892	20.9871	23.3047	62.3766	8.53937	69.1211	33.8692	91.3491	74.9446	68.509
50	Unknown	–	–	–	685	1.7	1159.45	13.4337	–	83	54.6163	16.3755	18.9621	19.3134	19.7046	1.42049	15.4895	16.7467	6.78909	18.1572	29.2202	15.1291	31.0619	26.5977	38.4715	16.8137	72.8649	24.299	20.1257	12.485	40.332	31.4316	37.3373	40.0818	25.2315	–	60.1357	1.24684	30.2382	32.3041	32.1151	29.0486	21.4043	22.8827	46.9587	11.7177	48.9306	121.573	21.7432
51	Uracil	heterocyclic	–	66-22-8	690	2.33	1164.56	6.7696	112	69	71.2395	22.9876	23.5527	5.74939	7.501	27.1402	126.198	38.3746	22.5043	13.2464	11.3458	78.6123	18.6926	2.05034	12.7274	5.14815	26.1983	1.38257	1.23509	9.79108	51.5857	33.3047	26.5096	154.269	317.863	45.6201	247.847	36.6973	92.9973	–	11.2621	15.4597	97.145	1.09292	38.0395	21.9854	30.0925	12.9898	13.104
52	Butyldiglycol	ether	–	112-34-5	715	1.81	1186.81	22.2724	162	41	802.137	897.253	1069.24	440.894	65.3353	49.5882	232.776	29.4338	97.0785	66.3799	263.166	54.3369	554.681	1073.56	1111.18	377.783	527.492	762.351	252.889	564.808	265.546	120.729	231.577	221.084	337.494	36.8419	227.296	28.6434	391.452	40.2382	222.468	62.2548	198.912	86.9306	204.894	89.0153	202.813	417.003	229.557
53	Unknown	–	–	–	720	1.87	1191.41	15.0605	–	43	183.003	110.037	172.215	117.842	113.509	39.2914	150.331	40.9268	105.01	236.666	161.982	115.409	177.109	217.111	192.138	105.961	698.682	273.721	70.3733	65.2043	134.621	89.0146	132.142	128.397	285.532	44.857	550.034	71.8297	269.889	168.238	121.691	91.9568	118.138	61.3599	125.625	128.85	342.949	573.548	231.361
54	Dodecane	hydrocarbon	–	112-40-3	730	1.34	1200.02	278344	170	57	302.547	156.357	271.253	276.112	221.379	205.094	334.179	181.574	223.307	410.142	237.498	319.854	263.628	663.733	239.141	282.36	890	222.525	981.591	221.65	316.661	189.18	395.751	190.58	331.179	164.139	414.146	170.469	438.673	193.871	372.957	200.943	286.003	281.05	498.857	325.464	203.723	419.169	284.427
55	Decanal	aldehyde	–	112-31-2	735	1.61	1205.04	21.562	156	83	106.222	52.6593	76.1317	45.7988	53.0399	19.4551	118.246	90.21	51.5316	66.3367	143.059	112.991	105.846	90.2635	119.821	51.4518	320.441	207.904	26.5682	36.1663	128.997	70.1976	148.353	47.6088	52.6649	36.8157	94.7565	114.036	256.584	107.401	152.144	83.2801	108.397	78.0943	241.009	86.6758	105.12	141.881	74.0153
56	Unknown	–	–	–	755	1.85	1224.31	9.94814	–	56	41.479	22.1876	53.9541	14.3872	33.3879	6.06919	44.0124	26.2633	41.8206	23.3599	75.3486	43.4245	5.888	6.68507	31.7392	18.4491	27.0157	28.6203	34.4045	3.78177	53.9242	33.1688	48.4238	42.2156	143.896	20.0865	111.313	40.4573	50.3899	16.6773	43.7678	34.0186	67.8836	15.3207	72.3107	42.7166	256.594	764.482	126.71
57	Unknown	–	–	–	770	1.65	1238.4	13.0101	–	45	231.152	156.418	304.409	130.943	52.7452	40.1337	69.7407	22.7598	70.1717	94.4012	1346.87	159.601	165.313	241.864	197.826	71.336	147.57	203.057	114.772	129.37	158.2	106.663	180.341	116.226	102.668	21.8718	140.586	46.9614	111.86	31.6547	101.339	50.5815	112.335	112.353	190.273	125.957	153.003	226.812	104.416
58	1,3-Dithiolo[4,5-b]furan, tetrahydro-3a-methyl-	heterocyclic	–	67411-25-0	770	1.86	1238.6	11.0762	162	84	90.9661	45.338	102.591	47.6248	62.1816	20.2043	56.3293	8.38989	58.7518	163.313	62.593	72.112	158.068	113.593	172.422	80.0681	181.312	86.3242	26.3276	42.6338	37.4487	39.0778	77.7432	47.6059	59.1583	19.2242	490.466	73.5556	256.635	196.914	85.4005	40.3719	50.2728	22.2555	77.0053	121.924	208.112	241.961	167.367
59	4-Oxononanal	aldehyde	–	74327-29-0	775	2.01	1243.51	12.15	156	81	183.681	52.6181	21.8649	27.4957	19.346	10.6642	149.574	45.4952	22.1038	24.6372	48.0623	159.208	5.82657	35.692	104.134	46.98	38.0186	15.9175	31.4948	28.4354	35.1539	30.5888	21.1566	56.5489	42.6919	23.4518	51.3471	20.2978	160.957	30.8629	41.7456	26.4538	564.558	33.1251	46.145	58.7552	25.5409	83.6414	12.0486
60	Unknown	–	–	–	780	2.18	1248.43	9.87564	–	39	79.3387	43.6713	50.8958	42.3657	15.9454	16.4214	38.0193	32.6148	40.0812	61.1506	45.9867	64.9882	22.1187	3.76159	15.7873	29.2468	83.2841	41.7953	40.5243	51.3657	58.509	43.9528	28.0892	90.7354	163.881	16.8244	141.132	21.2045	73.0692	40.436	32.2908	65.4098	92.4165	48.3435	62.5884	76.6574	38.405	90.2721	34.7199
61	Nonanoic acid	carboxylic acid	–	112-05-0	790	1.64	1257.44	18.7313	158	87	962.918	184.956	153.116	159.092	13.5995	13.4345	52.7552	34.6906	19.8053	29.9561	19.3336	39.9933	255.983	706.937	496.063	297.469	19.7452	18.2792	228.516	205.662	77.6267	14.9348	48.2089	81.6338	101.922	–	163.964	5.13706	179.276	51.9676	38.3333	49.5589	142.354	23.9778	51.3076	67.1065	479.156	350.011	390.238
62	Caprolactam	lactam	–	105-60-2	790	2.62	1258.37	11.2183	113	51	195.764	53.2528	108.576	46.1617	6.84941	–	26.6472	8.16345	33.0319	53.1854	84.9242	25.4877	62.6866	72.2994	275.639	73.684	694.641	943.856	72.3418	45.5163	10.784	–	27.6707	25.0007	129.911	16.6276	79.0419	14.5216	54.7248	–	9.78776	28.7758	68.1544	27.8503	44.2198	40.7299	4.35862	1.43025	6.63074
63	Unknown	–	–	–	800	1.94	1267.24	11.3174	–	56	39.1324	7.19849	18.9973	9.70969	28.2096	5.75072	16.9925	11.5921	22.8856	14.0492	47.3267	7.6884	11.8769	13.358	37.7804	8.15768	350.488	18.6276	12.9583	–	37.5711	3.07762	30.34	51.1761	105.618	13.354	68.1637	27.595	32.2071	0.208028	40.851	18.3886	39.572	25.3812	21.2801	24.1464	60.2016	524.904	14.3373
64	Unknown	–	–	–	815	1.78	1281.37	8.23211	–	83	8.66201	10.7285	15.4453	14.2289	28.7997	9.99379	13.5023	6.12043	15.5704	9.29142	10.4937	11.54	–	12.1796	21.2309	9.74229	40.3952	17.0625	7.27944	14.7563	29.7385	15.0619	13.9998	14.9441	15.7126	7.98802	42.2355	20.5278	20.7166	14.823	10.8408	4.70659	19.8275	17.6516	17.4775	11.9415	18.6618	9.5815	22.6338
65	2-Undecanone	ketone	–	112-12-9	825	1.64	1290.76	9.29093	170	59	95.8656	20.1923	22.8035	13.491	18.1958	17.1996	56.3167	21.9426	11.935	19.5782	27.2069	32.1257	9.24418	6.94345	29.004	2.44711	266.697	141.521	19.9767	15.2377	28.0233	14.7498	28.059	43.6157	99.2861	17.7957	84.9062	23.067	107.418	28.3557	31.358	17.4631	31.9474	23.9738	16.6017	5.37658	15.0692	28.7099	21.4731
66	Tridecane	hydrocarbon	–	629-50-5	835	1.36	1300.02	262665	184	57	285.818	249.966	374.091	410.862	216.385	397.904	349.349	367.927	258.452	387.879	271.691	347.547	286.971	379.182	337.649	403.81	1232.71	348.587	1263.7	264.35	364.048	266.076	372.874	300.771	333.526	313.733	402.377	283.606	510.701	235.375	351.182	222.626	289.876	321.635	507.458	258.267	275.031	591.735	374.094
67	Unknown	–	–	–	885	1.96	1350.61	9.85661	–	53	32.6633	18.5897	32.0778	30.959	25.8044	4.88201	13.0832	2.04303	17.9561	20.6868	41.2573	6.63739	34.5438	40.6214	24.9401	6.5815	259.254	47.338	24.4132	6.66267	20.6613	26.3265	5.16833	10.8297	37.8663	20.2349	35.7705	18.4855	28.2362	28.8157	10.2688	14.5955	21.2375	4.13706	32.147	26.2508	35.9528	170.597	14.8097
68	Decanoic acid	carboxylic acid	–	334-48-5	890	1.65	1355.3	8.22701	172	41	809.835	145.266	205.909	103.61	32.0149	–	211.84	83.4691	52.0659	42.8769	52.7088	127.052	384.021	1078.26	384.693	156.232	1096.76	457.71	57.646	56.7758	225.086	86.0472	75.1324	284.46	299.016	19.2036	405.108	91.0266	946.091	218.75	72.6354	100.868	1108.36	54.9042	364.01	143.754	1276.7	624.266	1150.99
69	Unknown	–	–	–	890	1.73	1355.38	17.0933	–	83	354.015	260.297	437.58	263.541	30.6527	8.20004	18.5023	10.8864	10.9607	7.10778	27.4544	17.4185	369.587	715.42	442.245	252.311	234.726	436.689	107.78	240.787	229.58	231.102	329.021	185.721	26.5689	6.88756	40.322	13.5493	40.552	14.0262	38.6999	15.982	20.4784	7.94744	38.2063	14.4784	233.685	308.141	206.496
70	2-(2-Butoxyethoxy)ethyl acetate	ether	–	124-17-4	895	1.84	1360.49	30.0554	204	29	1042.46	899.696	993.85	359.045	273.848	156.514	587.723	58.8263	261.653	89.5329	294.42	58.5196	483.333	703.193	877.289	277.933	488.108	710.667	509.62	1111.47	548.45	274.467	657.697	415.069	318.418	50.9647	289.332	28.0832	671.844	56.7359	446.155	61.0122	220.917	51.8683	249.578	66.491	420.114	617.748	454.63
71	Propanoic acid, 2-methyl-, 3-hydroxy-2,4,4-trimethylpentyl ester	ester	–	74367-34-3	910	1.73	1375.37	20.3827	216	41	1125.69	633.245	1451.39	950.313	96.1397	56.9778	142.206	32.9741	41.5933	86.2362	138.537	93.9275	1286.33	1972.2	1472.55	719.257	1023.54	1203.84	335.462	484.371	854.2	673.229	944.567	551.693	207.466	48.9891	291.253	50.112	297.969	176.308	149.787	96.7924	114.965	75.0399	149.279	98.1504	695.314	1380.04	551.049
72	Octyl butyrate	ester	–	110-39-4	915	1.69	1380.33	7.57115	200	82	33.0346	6.64094	17.7485	15.4562	20.3307	7.01619	12.3682	–	7.09403	22.8423	17.3868	33.1073	34.9315	13.2967	17.7709	18.3932	144.79	47.0166	15.8743	6.69949	33.2369	16.8858	13.7902	10.4957	20.7625	8.01065	31.3067	6.6059	33.348	38.682	18.5984	2.71723	22.5662	20.509	33.2934	15.7359	27.8024	38.0639	–
73	Tetradecane	hydrocarbon	–	629-59-4	935	1.38	1400.02	224396	198	85	212.055	130.601	200.279	206.895	143.179	116.75	141.927	111.683	139.294	204.053	216.967	211.599	198.704	296.243	159.945	144.041	151.837	220.805	88.3273	222.192	211.821	157.636	263.603	136.955	250.409	90.4247	271.987	100.486	397.904	180.671	263.492	165.509	167.923	164.569	356.807	258.353	128.43	227.356	185.806
74	2,4,7,9-Tetramethyl-5-decyne-4,7-diol	alcohol	–	126-86-3	940	1.65	1405.57	22.8021	226	29	346.196	238.086	339.941	159.516	86.3444	56.7345	203.344	99.2695	691.444	700.114	753.938	407.796	195.669	335.701	178.973	165.205	392.003	522.897	188.22	218.967	251.476	160.267	884.33	302.505	1254.41	111.965	272.882	114.963	622.599	262.041	1212.92	629.318	573.201	252.411	1132.17	296.566	120.965	218.081	112.478
75	Unknown	–	43, 66	–	965	1.9	1432.14	11.2632	–	43	161.471	90.5436	118.81	67.6301	125.998	61.1391	141.779	31.1062	69.0293	163.916	118.833	79.976	237.669	162.595	209.24	104.273	588.94	215.116	45.5469	58.9035	73.4824	71.3839	119.403	151.391	230.538	27.1705	632.582	106.317	361.933	222.017	143.634	66.4804	129.299	57.7745	168.734	103.313	245.641	340.915	117.948
76	Geranylacetone	terpene	–	3796-70-1	980	1.78	1447.8	16.6216	194	83	102.391	85.0173	62.1524	18.5167	19.0071	20.3945	126.956	347.084	9.3839	16.0659	32.3473	26.3078	51.2688	65.6154	42.2854	52.2852	306.455	208.57	26.8949	35.5429	52.5635	14.4205	30.334	34.9235	41.0872	20.8443	86.1464	32.8022	159.279	56.7146	32.8743	28.4675	22.1189	25.9581	57.348	20.0577	44.7028	51.2681	28.2921
77	Undecanoic acid	carboxylic acid	–	112-37-8	990	1.64	1458.18	6.24832	186	73	216.992	53.4631	109.053	48.2854	0.292748	35.8612	56.0313	34.9987	6.15303	9.91639	16.159	52.2063	43.7875	106.695	99.7971	65.8782	155.891	60.1597	21.0758	10.2783	48.1297	23.2615	33.6766	122.684	98.5953	29.4232	123.719	16.2828	196.548	34.9727	19.0739	21.7121	138.83	16.5762	57.1364	43.5795	223.231	70.9765	130.855
78	1-Chlorododecane	–	–	112-52-7	1005	1.56	1473.88	6.20609	204	109	56.9998	6.37458	15.2058	8.25615	5.92482	9.00732	34.2409	23.462	–	19.2386	–	4.83211	9.71923	301.619	29.1597	22.652	17.4418	14.8022	9.41761	18.8157	1.55112	17.1504	12.9705	16.3557	18.401	4.58683	17.7694	8.50033	9.88046	3.47084	5.61366	32.7884	6.11355	5.40585	9.10113	7.4145	11.9681	21.5354	15.0605
79	Unknown	–	–	–	1005	1.8	1474.13	8.7896	–	71	40.8864	14.548	15.0772	3.52406	8.05212	17.6323	19.2768	12.4777	–	22.829	13.9242	13.2149	34.8456	86.6516	52.1836	11.7764	142.03	39.2608	21.4629	15.7552	22.7957	15.3546	16.6593	13.5079	16.984	–	50.2375	30.4256	34.8889	44.9987	15.7509	18.1737	14.809	6.28632	19.4429	14.7381	25.3267	44.202	7.62874
80	Unknown	–	–	–	1005	2	1474.34	4.0705	–	56	51.5948	11.8845	0.836993	9.65646	9.31249	–	29.7352	0.329563	–	7.46108	0.890885	16.0492	21.0798	106.506	9.41251	27.3076	25.2156	30.187	6.61721	14.2517	24.6534	6.34664	6.34309	28.4278	262.897	1.90619	83.6993	19.593	17.7073	–	5.52961	12.1969	19.5378	–	4.5438	11.776	1.29607	8.93945	6.20293
81	Unknown	–	–	–	1015	2.04	1484.91	15.7634	–	43	291.247	118.378	195.889	95.0137	132.982	96.2967	173.806	42.6454	100.672	265.361	158.906	117.124	468.245	240.074	285.654	147.43	557.46	214.754	89.4072	86.8011	148.976	112.675	168.906	141.665	334.602	31.9273	902.436	177.392	504.399	375.946	218.888	91.519	148.993	74.9807	255.209	195.534	430.129	546.402	301.321
82	Unknown	–	–	–	1025	2.24	1495.64	37.8683	–	43	681.537	269.618	437.14	296.409	656.109	182.057	915.566	130.458	224.983	724.951	550.003	562.357	1262.94	614.685	837.904	596.563	716.999	254.04	253.058	264.232	669.918	385.508	588.978	447.097	527.741	172.249	2294.56	321.781	1669.56	857.756	930.51	474.043	590.856	263.808	1132.69	699.548	1092.33	824.418	904.869
83	Pentadecane	hydrocarbon	–	629-62-9	1030	1.4	1500.02	181276	212	85	206.009	119.911	100.191	153.5	91.5216	75.1577	98.6986	51.7013	101.414	153.691	120.533	178.677	128.526	184.468	103.088	127.524	142.975	180.98	58.8782	144.376	144.882	85.0506	214.88	123.085	178.201	60.2482	228.913	69.8164	421.243	150.152	161.758	120.702	118.228	130.817	177.508	150.13	98.7166	189.026	127.47
84	Butylated hydroxytoluene	aromatic	–	128-37-0	1035	1.83	1506.05	6.56441	220	115	67.444	34.5489	72.0313	51.6059	25.2981	15.8337	38.216	27.7556	27.5549	22.3287	43.163	21.2207	147.253	100.956	102.676	49.5802	59.8071	66.4886	31.884	40.8073	21.0818	26.2828	25.4225	27.9907	58.5289	10.004	52.6627	25.3952	85.5695	55.8696	50.3979	39.185	17.9661	14.6119	133.341	75.0444	110.465	115.118	100.002
85	Tridecanal	aldehyde	–	10486-19-8	1040	1.65	1511.41	7.60302	198	69	169.727	60.4704	123.794	75.7607	21.1073	4.36593	61.0293	34.6152	26.2548	36.7356	28.7791	59.8536	69.2974	83.8337	96.7678	39.0067	158.854	94.4744	22.4764	22.2641	77.4751	40.5389	60.3307	40.8323	45.1264	17.8889	69.8024	20.4039	256.267	84.6274	80.5902	57.0359	104.016	43.4597	88.9607	34.7917	61.3806	64.774	25.727
86	Ethyl 4-ethoxybenzoate	aromatic	–	23676-09-7	1055	2.11	1528.59	19.2773	194	43	76.5808	46.1796	80.1033	47.6374	50.6667	31.5828	93.9095	22.1905	61.4977	75.2182	57.5959	38.6647	133.026	89.1417	57.8576	60.7838	157.545	162.426	42.6185	26.7319	66.8862	25.8106	58.3433	43.0235	126.511	21.534	227.612	32.8762	160.12	100.066	92.8377	34.7006	44.5928	39.2402	127.466	47.8869	68.8197	107.894	61.4107
87	Decanamide	amide	–	2319-29-1	1085	2.04	1561.84	20.0065	171	59	225.765	229.182	144.231	129.917	34.8609	17.198	119.332	22.1257	22.8416	8.07518	56.1377	17.4458	92.1464	333.383	199.709	142.546	238.788	189.529	122.998	256.788	257.582	165.263	297.461	224.529	168.605	12.3506	158.464	4.33954	201.4	10.9423	76.8711	15.3107	134.945	7.05367	125.86	13.2302	104.171	333.253	134.81
88	Lauric acid	carboxylic acid	–	143-07-7	1090	1.64	1566.95	15.1622	200	91	151.538	113.082	65.4717	30.5813	14.444	13.1861	20.4786	28.9474	7.499	9.70969	36.8124	33.9607	82.4717	93.1827	58.489	54.8636	64.3919	73.8405	39.2176	65.1202	52.2615	21.6347	29.301	26.5083	25.4917	4.8157	24.342	14.5569	135.924	46.0506	24.8337	20.8796	46.8248	4.7261	28.0069	29.2823	47.4737	41.7259	20.6593
89	Unknown	–	–	–	1095	1.66	1572.53	6.35393	–	125	6.88224	4.40186	7.36283	10.5203	2.34686	6.32003	4.165	2.26747	4.32136	6.23886	10.7299	10.1697	2.97804	4.75116	18.483	6.75116	19.9614	11.7183	15.9361	11.4085	9.93347	–	3.26236	10.5285	18.283	14.7913	10.4713	21.0725	13.0386	9.09448	16.2546	–	3.18762	–	6.23531	15.1067	8.67399	32.4125	8.80949
90	Unknown	–	–	–	1110	1.69	1589.22	19.7435	–	111	134.675	72.9308	88.6265	46.3353	49.5489	25.8383	79.7818	13.5012	47.8432	28.6099	47.8563	34.3615	83.2914	105.117	148.162	64.6798	133.74	107.249	58.153	109.129	158.739	73.5174	137.679	60.4285	51.5003	22.6689	61.7159	16.6028	81.0053	42.5795	42.8696	25.0845	22.6642	18.6407	53.0716	52.8436	288.187	363.648	277.944
91	Unknown	–	–	–	1110	1.8	1589.35	9.80604	–	81	284.377	177.669	257.898	120.953	8.69483	17.9601	21.1597	12.269	17.715	17.7944	20.079	1.22023	538.463	460.741	302.32	293.16	304.227	349.904	138.178	232.409	20.6653	11.9035	23.1847	15.3378	13.9055	11.6647	41.2355	4.84719	41.6724	25.4671	19.7152	14.0481	8.54092	10.6886	34.9594	24.4365	16.0532	15.5848	–
92	Hexadecane	hydrocarbon	–	–	1120	1.41	1600.02	93629	226	85	256.736	207.568	152.172	214.693	183.214	103.491	187.838	137.939	125.027	372.58	161.373	344.221	285.078	329.499	184.708	208.669	241.373	254.647	119.401	216.63	255.993	143.222	250.143	205.023	269.196	74.8306	415.126	115.411	919.118	289.764	320.769	248.989	207.913	191.143	333.6	221.582	236.337	353.518	311.343
93	Tetradecanal	aldehyde	–	124-25-4	1130	1.65	1612.07	20.6697	212	95	68.3327	49.2495	64.3081	46.3107	35.1557	12.6141	38.3606	57.9175	54.5879	37.6039	27.9359	49.9128	84.2136	80.1151	57.3347	56.2422	150.491	105.082	30.3304	35.8441	72.8769	49.0253	66.0958	44.8536	15.2528	29.8756	30.9346	24.1559	173.929	63.3979	74.8583	38.1175	31.0532	43.7745	95.0086	37.1517	46.6181	102.78	48.1637
94	Isopropyl dodecanoate	ester	–	10233-13-3	1140	1.57	1623.74	13.468	242	97	127.325	57.4342	42.9108	46.7159	30.7638	9.77667	32.2329	10.1537	27.0546	33.7445	21.9807	127.443	39.35	59.0073	43.8556	32.2868	29.5988	41.7931	24.9031	31.2009	42.2282	33.4926	68.4917	35.9922	21.4178	10.2901	108.094	18.851	111.838	40.6806	44.8354	27.5709	28.4052	4.02395	23.2375	47.1238	33.7385	50.8935	62.7365
95	Unknown	–	–	–	1150	1.72	1635.67	4.08642	–	68	56.0421	56.2832	27.485	16.2967	–	2.13595	16.6933	9.45287	–	22.2601	9.05323	1.24484	21.9723	30.7046	26.7079	17.0637	36.9106	38.2908	17.66	31.295	5.95764	1.69905	2.80461	14.489	30.8683	22.5289	11.5156	–	12.1477	8.39787	12.593	6.38856	16.0452	12.3347	–	–	8.25992	–	8.83721
96	Unknown	–	–	–	1160	1.4	1647.06	18.5554	–	85	102.876	85.2974	49.4697	64.0027	75.5928	43.7738	133.351	80.4431	63.5223	87.6181	72.7831	88.644	70.5196	73.4019	113.44	127.36	131.541	120.953	29.9215	46.2774	116.493	132.286	164.5	109.687	149.925	36.0002	173.619	77.7525	386.584	146.307	164.481	123.015	77.155	84.0153	110.251	66.5855	259.049	331.346	304.633
97	Unknown	–	–	–	1160	2.48	1648.33	5.69373	–	51	21.7829	–	20.9645	20.827	38.6873	1.47505	20.8217	29.9414	20.3622	22.5609	41.662	37.0266	12.9297	33.012	30.2994	4.23109	147.123	68.0849	5.36261	11.1626	9.16168	19.4981	91.7716	59.1843	56.499	13.3699	44.6254	20.8922	92.5655	28.5642	20.0459	56.5123	34.5627	39.7645	49.4351	26.5589	77.8057	253.795	35.0339
98	Tridecanoic acid	carboxylic acid	–	638-53-9	1165	1.68	1653.27	8.49536	214	59	64.3546	25.3205	105.627	54.8306	39.9035	10.7443	47.4884	26.7432	6.88423	0.369927	2.03127	35.3963	22.0082	44.656	37.4673	31.4857	48.931	53.3546	8.7261	8.58594	49.5669	40.3852	44.0206	136.849	72.6877	13.9461	53.2644	9.93036	97.1397	53.766	39.7332	41.326	87.0093	20.271	65.5709	35.825	26.9767	31.2315	24.6094
99	Methyl dihydrojasmonate	ketone	–	24851-98-7	1165	2.14	1653.81	6.83936	226	89	38.2894	29.8372	32.5429	1.58283	15.136	3.04857	5.334	1.91528	11.4132	1.50122	2.52562	15.3506	60.5609	56.7112	55.4458	28.232	33.5072	49.1404	25.2901	46.4351	7.87226	5.70459	–	–	12.98	8.76181	10.9914	4.24329	4.29009	0.666445	6.23642	4.66356	0.172544	18.4937	11.4059	–	–	5.54358	8.72743
100	Unknown	–	–	–	1170	1.96	1659.48	10.7616	–	202	263.201	165.467	277.39	158.587	26.1561	–	12.1679	0.658683	13.0765	11.4019	6.67886	4.36793	607.76	435.834	365.574	290.402	312.249	374.937	142.92	231.322	–	2.71235	–	7.85119	16.0339	7.13972	22.9002	–	11.1896	4.5356	–	1.83367	2.4633	1.76713	1.51297	10.7831	17.7501	3.01286	12.0326
101	Unknown	–	–	–	1175	1.49	1664.81	14.3651	–	97	63.6873	63.9933	56.0725	44.7359	23.8476	27.7545	66.1517	35.5595	30.1969	37.3134	33.3227	62.5462	66.2495	90.851	67.0346	58.2987	86.4378	81.0186	34.5263	57.7059	76.1796	59.0472	68.849	48.7658	64.2542	26.1424	68.9434	42.4311	148.245	54.3892	77.2169	54.4751	58.6833	46.2562	58.0419	37.7625	131.41	131.019	131.746
102	Unknown	–	–	–	1180	1.59	1670.81	10.535	–	109	55.2442	27.9956	20.0459	21.2868	–	17.2783	28.7591	24.1477	22.7984	3.02329	–	17.9607	31.2029	154.3	27.0206	16.5352	24.5531	20.7505	13.7328	24.5908	33.3513	17.1351	21.3114	29.2967	32.3167	27.3819	18.7984	0.242626	48.9301	20.4225	9.57552	22.6837	4.56199	13.1756	23.0153	15.8536	34.9408	42.7186	49.2497
103	1-Chlorotetradecane	halogenated	–	2425-54-9	1185	1.65	1676.76	7.94725	232	168	38.1969	40.2635	6.48126	28.0909	1.81903	6.3167	13.405	24.4482	–	8.82236	7.17565	26.2125	45.8929	84.7722	16.2329	11.1863	120.172	79.0832	4.14371	23.1005	27.8071	8.35551	32.0985	37.0976	35.3724	7.23087	25.073	6.47638	174.383	67.3588	11.0918	11.7538	1.10424	15.9406	15.2189	23.7026	18.0413	26.6294	19.2428
104	Hexyl salicylate	aromatic	–	6259-76-3	1190	1.92	1682.96	4.63135	222	222	232.296	132.025	40.1244	29.9142	9.16057	11.7465	11.6427	18.1941	13.8479	23.5757	5.76026	21.2675	48.3859	44.9627	40.8583	13.2788	14.676	6.87359	8.48769	1.11776	4.48858	5.15879	17.7272	13.1173	0.456199	1.98071	3.42981	6.1843	361.276	100.991	27.4915	11.7991	9.83566	3.63207	22.1397	8.75826	38.4362	47.6075	13.8423
105	Heptadecane	hydrocarbon	–	629-78-7	1205	1.43	1700.02	47219.4	240	85	412.493	320.165	143.683	171.177	78.8071	89.2808	169.13	158.348	111.925	284.478	139.645	357.59	250.132	255.875	314.906	304.603	273.082	278.701	91.8538	149.28	343.021	176.445	222.446	175.834	216.128	67.8403	304.392	85.7172	1351.26	498.636	316.94	330.927	196.94	216.681	236.18	205.735	313.818	333.682	323.695
106	Unknown	–	–	–	1205	1.65	1700.3	14.4868	–	59	117.002	74.0685	155.793	112.937	52.0592	18.8532	175.161	147.532	54.3972	50.3852	58.2402	66.0317	138.782	175.214	168.523	97.7079	1128.23	742.618	59.9375	64.7811	150.158	62.7432	86.2947	117.233	107.874	35.9315	182.085	53.061	477.11	111.941	150.701	97.8456	120.718	58.7997	140.749	71.0765	92.1291	104.78	51.658
107	Unknown	–	–	–	1210	2.13	1707.15	4.95423	–	130	427.15	239.407	312.097	152.637	–	–	–	7.50743	19.5143	8.93546	8.37237	–	913.405	705.526	516.81	346.774	515.576	495.102	223	371.625	–	5.58794	10.0497	4.65203	–	5.16057	–	4.9033	26.1863	13.7598	14.2621	17.6181	5.58283	–	7.8574	–	4.29874	3.22355	–
108	Unknown	–	–	–	1210	2.39	1707.47	7.74445	–	99	298.348	204.549	798.455	124.091	29.0965	13.2047	42.0266	8.74274	20.1517	52.4351	21.1958	28.0798	135.741	112.175	301.008	510.177	856.426	2349.64	543.446	616.572	9.55445	16.1133	29.6274	70.6447	14.3114	10.6183	58.6387	6.93236	49.4757	30.813	56.483	26.1863	34.0355	18.2515	52.4318	29.3903	27.3136	40.1422	31.688
109	1-Phenyl-1,3,3-trimethylindan	aromatic	–	3910-35-8	1225	2.11	1725.87	11.881	236	43	401.87	252.943	320.937	236.856	58.4657	22.1444	77.69	32.7099	46.4739	68.1903	45.1477	59.7026	814.027	649.001	552.94	326.725	1574.27	471.906	228.053	327.54	44.6707	69.9687	70.2708	70.4218	161.972	19.1934	264.417	42.4298	159.059	122.667	75.6181	51.6554	76.6999	30.2914	104.383	45.3835	115.735	121.191	84.2828
110	Unknown	–	–	–	1240	1.42	1743.76	41.0579	–	70	62.7445	54.0818	48.3333	41.1091	73.1404	28.1184	109.607	49.8483	51.648	82.5349	67.3766	94.0692	91.2402	172.268	102.537	91.7771	74.2189	80.4065	27.8916	39.014	103.927	80.153	127.985	126.368	150.469	29.7969	155.639	49.8463	225.231	110.961	119.342	112.529	49.6134	64.5502	119.345	72.5017	154.955	183.832	175.977
111	Unknown	–	–	–	1240	1.76	1744.18	8.4305	–	138	96.1029	31.3906	34.4338	27.8177	7.40186	3.78177	26.4436	30.1229	0.424706	15.6398	8.44578	8.32735	25.0408	39.9807	59.9375	43.1843	244.804	120.017	–	17.7878	20.0778	7.79574	7.31737	6.40186	24.2096	5.98337	32.4438	11.6221	73.1544	39.0938	8.84697	21.6214	22.0479	14.7718	22.6662	28.9009	31.984	15.6673	3.25527
112	Unknown	–	–	–	1240	1.88	1744.33	9.41818	–	95	184.263	47.0033	32.7046	14.884	9.77977	4.75981	21.7374	20.1439	13.489	19.2537	13.2216	8.86494	55.3766	69.2102	39.1297	27.2322	91.6075	44.5316	19.5924	14.0206	16.8969	7.48481	14.5602	9.23287	10.2568	–	21.7705	11.5489	66.6168	18.8483	33.3979	7.89665	13.2289	8.81504	30.2967	18.1324	15.8869	7.23132	17.1282
113	Unknown	–	–	–	1240	2	1744.48	10.2498	–	107	125.243	96.9933	88.7924	63.4391	18.1038	9.03526	30.986	7.76514	21.5003	15.7248	23.7252	8.82302	129.444	166.939	142.228	92.8729	100.205	165.731	53.6647	132.921	31.5083	16.601	33.3613	30.6041	32.676	0.280993	50.9268	15.4347	56.4285	39.7252	40.0739	13.3985	36.8317	21.4012	41.1005	10.8749	24.4717	34.314	40.815
114	Unknown	–	–	–	1245	1.65	1750.29	7.96797	–	133	192.538	138.542	67.3646	31.0767	34.8516	23.0173	34.2546	80.566	13.8949	11.1231	55.9907	56.6427	110.194	123.037	41.7944	37.5498	43.0446	55.1969	33.4804	17.128	91.8869	32.2375	34.1144	39.1419	25.876	–	27.9661	4.60279	347.916	115.188	75.0905	44.7372	49.4817	26.0197	33.6487	24.9991	74.0135	81.5436	20.8685
115	Unknown	–	–	–	1245	2.17	1750.94	4.73161	–	65	50.9275	51.666	25.161	22.1007	5.35795	12.7075	10.7611	6.40519	9.44134	14.9279	24.56	15.8822	61.5835	54.9222	20.9594	16.7529	106.128	35.7603	5.40142	8.49257	28.336	11.167	25.5556	33.312	9.06254	2.08117	18.475	12.8126	236.052	103.429	41.2406	11.9661	28.0652	4.99268	25.3054	23.9521	4.2648	4.31603	2.98736
116	Unknown	–	–	–	1255	1.64	1762.78	13.0603	–	75	178.311	114.639	157.944	99.4737	12.2049	0.13462	85.9661	37.4504	2.00732	15.1404	3.88024	84.4032	132.797	204.943	144.565	105.622	279.317	184.228	11.1406	23.7099	88.9661	40.2814	55.2821	50.1969	124.526	25.281	47.0625	46.8609	237.612	102.93	39.931	54.6627	251.92	30.2353	133.259	80.684	162.867	49.69	71.218
117	Myristic acid	carboxylic acid	–	544-63-8	1255	1.69	1762.84	13.6476	228	121	56.9488	36.7112	67.0971	58.6121	16.5496	10.0262	39.5172	43.7705	–	16.7073	15.9328	29.7396	69.668	88.6833	70.841	86.2954	100.472	83.3254	3.96496	27.8967	31.521	15.202	12.6713	79.1085	161.762	4.42182	83.523	21.6846	139.094	46.0761	8.72344	9.59104	123.208	14.3679	72.9654	28.9055	46.3788	19.4923	23.4471
118	Dodecanamide	amide	–	1120-16-7	1260	2.04	1769.53	15.9999	199	59	635.789	355.018	195.95	272.576	96.0106	41.6687	343.764	106.474	146.475	67.9202	221.231	77.1989	245.849	961.606	465.664	336.667	427.659	262.108	240.302	378.165	372.138	204.826	545.309	492.428	310.581	85.0259	675.113	36.5928	483.746	97.334	218.642	57.5376	408.864	181.933	482.2	102.362	344.169	637.651	252.122
119	Octadecane	hydrocarbon	–	593-45-3	1285	1.44	1800.03	30930.2	254	85	459.185	371.758	275.094	218.597	139.52	74.0226	289.957	313.137	145.053	311.378	185.564	367.472	391.019	517.602	553.408	421.939	430.097	442.77	109.967	212.375	485.265	304.669	318.919	252.486	290.67	111.214	395.838	164.355	1587.3	667.309	343.977	361.947	289.378	233.197	412.009	247.36	289.177	519.707	463.505
120	2,3-Dimethyl-2,3-diphenylbutane	aromatic	–	1889-67-4	1285	2.21	1801.05	8.78379	238	51	133.4	79.5622	80.8563	68.4118	27.6068	–	13.7112	16.8869	34.4657	24.1648	38.9599	5.31936	282.487	144.699	164.409	46.4491	204.252	139.699	61.1417	71.0679	4.36926	–	22.8461	10.9279	28.9095	9.89355	37.646	9.71546	21.31	12.4298	25.8884	9.87847	78.1477	11.872	38.4232	6.13262	6.60745	6.96008	20.1883
121	Uknown	–	–	–	1285	2.25	1801.11	14.7634	–	125	45.1677	53.5921	27.7545	21.9727	226.647	107.397	46.9647	111.487	343.391	89.3739	245.948	66.5673	42.0333	26.6565	30.1018	26.986	173.775	67.6747	110.271	56.9195	35.7035	27.978	31.0872	19.7725	136.727	155.485	369.012	43.0512	277.085	48.0479	140.987	61.3387	1000.58	143.059	626.492	48.7552	17.9834	39.6008	35.996
122	Unknown	–	–	–	1295	1.88	1813.94	13.0461	–	93	184.308	128.992	43.8822	27.0605	25.7234	5.69594	26.8011	12.4165	11.6893	19.0805	15.8372	15.4779	104.995	94.0876	100.721	64.5722	50.5775	47.153	12.2302	37.014	119.087	39.0931	37.4538	25.5547	17.3779	14.1546	29.6407	18.9468	165.486	61.7505	28.5875	37.7791	39.0273	34.925	45.9956	24.8743	54.8377	86.1051	12.7399
123	Unknown	–	–	–	1305	1.7	1827.03	7.70946	–	135	31.5502	25.8117	67.4039	48.5902	8.80883	5.87115	32.7778	22.9534	–	8.52162	6.67665	10.8263	23.8184	74.3733	67.4331	77.5538	130.383	85.5063	10.2355	28.9328	20.8969	5.31226	7.96873	35.7578	66.3819	15.3786	51.7006	23.7053	110.512	50.1856	13.0723	35.1273	43.1532	12.9009	35.2701	29.7403	17.5434	19.0931	18.611
124	Unknown	–	–	–	1310	1.66	1833.64	13.2436	–	147	162.211	138.636	39.9288	24.9807	12.8567	19.8008	46.479	61.1883	14.7039	32.5662	38.9514	64.6525	130.078	142.223	59.5975	38.9069	29.7796	40.1619	11.7798	29.7838	96.1002	36.5888	33.5569	33.7206	24.9707	13.668	25.7709	9.83034	453.427	153.592	40.9368	61.7676	51.1191	37.4227	29.4451	21.8887	71.5309	116.393	30.1983
125	Unknown	–	–	–	1315	1.5	1840.1	50.0824	–	95	103.067	45.8377	147.714	52.1098	261.315	158.993	123.116	36.4478	65.1823	131.313	128.633	148.21	173.86	101.64	188.94	102.563	149.395	66.4424	72.0413	154.105	123.502	87.8718	179.364	80.9275	80.827	39.6341	97.338	128.59	232.275	312.316	357.005	252.866	331.46	128.504	574.088	238.496	109.442	214.837	122.632
126	Unknown	–	–	–	1315	1.63	1840.27	23.5029	–	58	279.188	165.727	175.059	142.923	210.739	150.784	375.99	168.615	241.182	259.009	369.841	381.346	258.413	381.309	224.674	204.469	413.25	352.071	107.76	166.737	360.469	240.209	382.441	163.286	373.277	106.576	489.462	191.23	890.166	387.8	523.667	367.585	368.846	215.849	429.519	435.925	284.54	260.896	251.063
127	Unknown		–	–	1315	1.78	1840.47	10.4051	–	124	48.4187	27.8084	69.1697	34.4269	–	3.99756	22.6434	33.3965	4.29097	29.4305	2.64515	34.8678	36.79	89.155	57.3806	60.5893	232.49	123.758	8.58638	10.6168	7.28543	9.91351	0.250832	34.4285	55.4085	9.34464	40.833	22.517	67.2096	13.5498	4.61078	20.976	48.6931	18.3216	18.2965	35.7525	27.2548	10.5003	5.84897
128	Unknown	–	–	–	1315	1.84	1840.55	20.3101	–	93	51.4943	55.8656	55.7611	78.6986	38.8982	28.2422	36.4118	131.053	60.8982	47.4367	53.3952	29.6826	286.589	373.417	95.0852	74.8051	89.644	100.216	26.6995	41.9947	65.4677	47.2063	118.041	8.83367	20.436	37.2688	31.2708	43.857	503.476	247.914	289.013	131.416	6.16966	59.6662	234.129	20.477	78.0333	123.993	42.2881
129	Unknown	–	–	–	1315	2.18	1841	8.06375	–	78	308.608	249.838	194.138	147.933	–	12.8649	8.11666	15.9501	4.05323	12.3486	8.27456	24.7339	598.275	564.311	416.789	250.122	373.669	362.681	142.104	267.085	–	3.83034	8.64427	16.3733	0.469062	10.0854	–	–	26.4602	11.5961	7.66223	13.9494	12.8867	8.96208	6.40452	–	3.65979	5.49102	18.7119
130	Unknown	–	–	–	1320	1.91	1847.31	6.21134	–	127	3.32202	2.69261	14.8468	1.73985	11.7711	4.69195	7.06942	6.38545	4.5489	13.3065	6.94056	19.8833	0.685074	9.37702	23.1304	–	–	11.3659	5.10047	0.114881	5.09847	10.2005	24.3287	–	16.554	0.72943	0.0984697	6.21002	10.8902	8.32402	2.11444	6.43846	11.6953	3.04125	14.4212	2.60124	14.3919	7.0244	11.5813
131	Unknown	–	–	–	1325	2.01	1854.11	3.35015	–	179	13.0869	10.0348	2.66201	–	12.4118	6.93236	13.8363	0.509869	4.59947	16.5582	8.3462	–	10.1297	21.8749	13.1229	–	8.57175	–	–	12.9117	11.7013	10.352	5.46707	–	–	6.41251	–	2.20404	14.4597	–	6.28543	4.89022	9.16633	4.61677	23.4549	3.17299	0.499224	11.2462	–
132	Unknown	–	–	–	1330	1.52	1860.12	22.9695	–	97	134.455	94.1776	119.039	107.697	66.1577	45.3267	99.6713	77.2788	39.5163	70.4132	66.7853	104.112	117.912	139.344	250.653	194.947	258.747	165.994	38.4152	66.6554	136.285	75.2375	90.0532	79.9395	113.953	33.4742	135.214	55.5855	299.357	144.351	133.792	107.295	152.807	74.9614	156.677	91.7325	139.637	148.621	181.029
133	Pentadecanoic acid	carboxylic acid	–	1002-84-2	1330	1.73	1860.4	14.1543	242	108	6.31781	15.9448	26.7234	29.7041	12.0758	5.46995	17.1111	17.338	4.95121	4.37991	3.998	6.92837	22.7831	45.4405	31.5034	30.3679	61.3812	41.3908	6.56953	13.5542	24.7518	30.7423	19.8197	22.2854	53.3149	5.57396	31.2923	5.9756	26.312	20.4837	9.30938	10.5088	75.2646	10.7172	9.75427	5.76602	0.674207	29.2211	6.99002
134	Versalide	aromatic	–	88-29-9	1330	2.07	1860.85	6.5218	258	74	10.1914	35.3486	0.731204	8.66999	12.3127	9.97095	11.8503	14.1448	4.19472	9.68197	0.281437	8.88201	33.6467	42.1916	57.949	62.0222	21.0189	17.3522	3.59215	–	–	33.5336	20.6591	11.0798	26.6527	–	13.6534	5.96141	20.9341	23.4471	15.0885	5.21291	21.5425	–	9.19783	19.9714	38.022	38.1524	9.1965
135	Unknown	–	–	–	1340	1.85	1873.89	10.1897	–	107	30.9434	21.815	29.1104	7.09847	11.5831	–	7.07252	9.41983	3.15147	323.432	7.30605	204.978	27.4904	41.0393	15.3001	25.6126	45.3034	36.0632	5.34132	12.5857	3.02772	15.8099	0.442892	19.3666	22.6607	–	4.39454	127.936	11.0446	124.329	–	167.503	19.9561	110.945	13.6591	194.037	10.6387	17.3797	14.5296
136	Unknown	–	–	–	1340	1.93	1873.99	9.13408	–	101	73.0852	9.37858	19.1231	22.189	–	4.66445	9.15857	16.7645	6.24174	9.08649	11.3739	14.0253	20.839	33.6241	103.747	62.0027	80.3287	43.4571	2.50188	1.85252	9.13129	24.6354	–	14.3194	45.9401	6.29253	58.7139	14.2834	40.2876	9.54225	9.11821	11.2528	63.1745	0.454868	20.5913	20.672	39.9148	11.8166	12.7784
137	Diisobutyl phthalate	aromatic	–	84-69-5	1340	2.13	1874.26	25.5205	278	104	330.528	224.061	108.147	59.7161	81.3906	10.1668	145.334	109.581	85.4451	79.6853	104.232	99.0432	174.314	173.756	168.6	107.194	200.7	188.13	79.839	155.594	184.725	122.592	311.813	79.489	215.369	24.8822	671.911	218.117	331.1	104.343	133.151	88.0579	174.244	116.88	214.418	61.2495	131.315	211.16	172.586
138	1-Hexadecanol	alcohol	–	36653-82-4	1350	1.66	1886.96	15.395	242	109	140.13	97.2588	40.9015	31.7731	22.7438	14.2774	31.9228	62.1657	7.70925	14.8383	14.1459	32.8051	53.3214	94.2482	70.3446	46.9315	190.757	133.402	34.3939	23.3078	63.2588	35.0286	44.664	36.1184	55.501	33.3265	81.3706	17.1887	553.281	160.206	37.5935	29.3839	55.4478	35.0852	80.9543	29.8527	35.4198	47.8935	33.1138
139	Unknown	–	–	–	1355	2.42	1894.64	3.6662	–	39	339.252	232.762	334.279	389.55	–	3.28432	27.2876	11.8856	7.82036	15.8955	6.66778	36.4393	109.57	138.947	95.0885	74.2801	77.76	73.2129	20.1779	24.3078	25.3599	5.80106	–	20.6394	45.0628	3.84498	91.2668	2.1426	264.054	88.9281	45.1559	41.3932	68.0011	27.035	332.691	136.431	98.3382	172.288	44.5427
140	Nonanadecane	hydrocarbon	–	629-92-5	1360	1.46	1900.03	16330.5	268	85	426.108	357.369	275.697	214.271	116.055	71.6414	213.607	271.716	99.7751	201.443	161.607	264.068	301.88	458.504	684.312	492.25	647.443	561.626	105.011	215.459	442.378	231.431	323.682	221.595	287.603	75.4285	376.217	144.592	1505.49	628.781	403.576	437.525	328.293	244.752	429.675	236.89	229.484	319.249	245.9
141	Homosalate	aromatic	–	118-56-9	1360	1.98	1900.72	9.55741	262	109	79.9328	78.4427	152.662	85.998	5.72788	8.36394	10.6347	13.3886	4.18164	18.2227	44.2974	67.66	70.8796	85.1253	220.718	68.536	169.738	112.97	22.9581	16.3021	247.047	87.3886	33.3733	44.499	34.6627	8.79508	50.3041	8.29674	302.368	124.571	71.3546	38.9978	34.9599	11.2972	42.0745	22.6662	71.0812	93.1204	19.0204
142	Unknown	–	–	–	1365	1.9	1907.28	7.54928	–	51	26.3812	8.49789	47.4904	26.7126	12.4442	10.666	4.47971	15.6928	–	2.74673	16.0162	26.6933	19.354	33.1603	42.2369	23.1963	51.8204	25.0047	19.548	14.9113	27.7574	1.76336	68.6946	19.4251	38.4941	0.398093	91.0326	27.817	53.0111	24.719	30.2468	15.5462	46.8689	7.26236	26.0852	18.5595	–	16.0861	29.3533
143	alpha-Springene	terpene	–	77898-97-6	1370	1.7	1913.68	19.0559	272	91	351.148	220.546	555.276	497.367	254.925	124.067	1059.97	764.944	287.808	280.884	672.484	386.665	678.474	406.414	730.269	192.991	711.812	151.889	75.3265	89.6507	2233.54	861.39	383.826	104.311	157.561	113.208	565.942	354.338	2277.24	629.149	1710.1	993.922	579.082	605.267	1326.28	273.419	181.356	1433.45	170.706
144	7,9-Di-tert-butyl-1-oxaspiro[4.5]deca-6,9-diene-2,8-dione	ketone	–	82304-66-3	1375	2.16	1920.95	21.2198	276	149	108.516	58.346	45.4373	36.7929	530.906	219.705	602.355	176.134	433.654	45.7618	595.632	90.2588	105.788	182.616	120.236	121.448	158.965	123.361	54.4118	83.024	112.564	69.4677	117.083	54.4917	797.7	144.07	756.549	28.2202	1132.19	81.0885	735.23	55.2695	609.438	86.1078	607.306	63.261	86.2721	154.584	110.349
145	Unknown	–	–	–	1380	1.65	1926.94	8.84139	–	75	65.7512	34.2333	56.2546	55.3061	18.2555	7.92282	58.0914	19.4232	13.7044	56.9933	30.3673	62.018	58.3001	75.1424	58.9634	47.5529	83.3866	75.9787	18.3952	15.6024	50.1603	24.1045	25.8822	47.5615	33.3446	0.485696	89.7232	21.7179	170.351	64.4424	92.9834	62.367	97.1218	31.7851	79.4365	38.0299	46.0641	48.9446	27.7991
146	Unknown	–	–	–	1395	1.7	1947	7.8816	–	168	43.0985	4.32202	7.05567	–	5.64005	–	3.49745	20.682	–	1.45642	0.560656	7.59015	16.7265	202.972	37.8365	15.3422	2.83855	16.5136	4.8758	1.81748	–	13.3387	9.09182	14.4544	19.7598	3.34997	16.0792	14.2486	21.4369	11.4495	9.60812	12.5159	9.35729	–	2.41717	3.50166	–	11.672	5.68086
147	9-Hexadecenoic acid	carboxylic acid	–	10030-73-6	1395	1.78	1947.11	12.4853	254	122	124.08	70.994	127.857	76.8649	–	–	33.1521	79.1513	8.67265	20.8663	4.77046	40.0106	81.9727	253.374	208.205	199.745	522.567	465.156	15.2499	8.15436	36.5975	25.5576	14.6531	75.9953	149.719	21.3914	79.0213	56.3114	193.248	98.1504	27.1291	35.7119	86.5775	10.3959	89.3362	69.0333	126.409	32.5875	16.5225
148	Unknown	–	–	–	1400	2.84	1955.19	4.35123	–	70	105.067	–	21.7651	9.47926	–	–	34.5037	12.7073	24.8423	20.662	20.7833	38.4764	7.93923	37.2431	67.6157	20.155	9.94012	3.3992	6.94079	11.5094	20.7297	20.8507	38.1956	105.601	641.576	22.8119	197.138	19.2841	54.1233	9.9348	9.34708	26.8989	73.1071	7.00754	37.4269	44.2049	12.106	10.2364	17.016
149	Unknown	–	–	–	1405	1.46	1960.01	23.4346	–	70	103.637	92.4039	71.4152	70.3067	36.2029	20.8769	71.5775	85.2415	39.7572	78.3506	52.1896	68.2056	98.8756	256.069	246.671	187.2	226.291	186.696	26.3619	66.0406	97.346	70.4391	94.1404	64.9142	98.1643	22.0359	131.236	45.4444	295.092	135.241	98.4345	85.2515	88.5456	54.9914	127.617	61.7931	77.7252	79.4225	84.3586
150	Unknown	–	–	–	1405	2.4	1961.26	17.8587	–	55	78.3045	57.8277	87.809	54.2043	493.953	123.557	241.144	216.926	357.016	61.4968	369.217	57.4879	58.0852	124.229	141.123	67.1018	397.919	122.867	23.3061	54.9401	77.5762	45.2284	77.3373	82.8157	463.332	204.669	643.601	32.1497	1042.74	81.5216	483.001	60.0106	536.922	22.8969	583.669	72.9361	127.667	52.6722	54.2848
151	Unknown	–	–	–	1410	1.64	1966.92	19.8719	–	131	142.953	72.6075	166.206	82.477	14.9275	8.02484	82.0725	61.4021	9.04524	48.5252	15.4192	88.4651	90.4391	230.753	322.423	279.99	276.431	260.409	16.9508	61.2255	39.4245	31.4214	48.853	146.224	143.233	26.5808	98.9967	98.1084	279.248	158.137	47.9681	79.0091	374.173	32.5902	164.086	144.503	198.985	47.0047	60.6919
152	Palmitic acid	carboxylic acid	–	57-10-3	1410	1.73	1967.04	22.5874	256	107	343.637	134.412	504.866	273.163	116.207	24.784	592.809	300.172	107.562	110.486	275.506	260.663	384.073	486.271	879.485	692.263	1010.27	490.494	38.9135	79.1351	962.843	318.048	143.949	306.873	403.248	69.6707	576.309	295.482	1307.43	413.275	707.92	443.313	768.986	255.7	667.508	353.782	379.782	541.474	93.4365
153	Dibutyl phthalate	aromatic	–	84-74-2	1410	2.2	1967.66	19.6064	278	50	99.4371	92.7179	59.4529	65.1433	12.9532	18.2879	58.0182	48.68	42.5485	78.1528	78.5742	119.983	93.6001	210.555	116.322	106.134	208.011	164.423	71.9111	95.9734	223.47	121.89	92.7465	35.992	97.169	27.198	123.646	57.7416	266.854	115.253	58.7219	55.5995	212.118	110.685	122.937	97.191	161.288	303.3	141.095
154	Unknown	–	–	–	1420	1.95	1980.66	31.2223	–	135	36.189	21.994	126.649	65.9927	41.1244	3.2546	151.969	70.346	32.5902	43.3806	69.4804	50.0539	78.2801	26.0419	97.3706	35.324	92.5469	78.2136	44.2009	37.8476	218.472	74.5489	59.4012	17.654	30.0146	23.2987	98.8416	43.3799	229.947	85.1118	199.834	103.803	77.3127	72.4471	181.223	68.5944	36.0632	163.38	35.5473
155	Unknown	–	–	–	1420	2.04	1980.78	16.3203	–	59	249.169	86.8962	136.786	75.9494	38.0996	13.8155	174.85	71.3027	60.5039	39.9035	67.0958	86.1643	133.223	393.8	205.13	100.21	414.772	164.687	73.1424	63.9807	165.263	76.3094	227.112	265.424	55.7159	24.0639	164.406	27.316	204.724	107.414	116.98	57.6145	220.49	40.7844	155.394	96.8809	213.625	275.973	295.584
156	Eicosane	hydrocarbon	–	112-95-8	1435	1.48	2000.03	8697.26	282	85	598.429	564.361	422.73	357.16	168.972	106.388	315.456	460.98	140.174	261.579	226.016	265.02	532.547	728.964	1111.38	737.438	861.135	949.921	228.161	385.063	559.586	279.591	416.615	240.665	388.377	116.705	489.675	210.438	1430.44	811.54	473.315	540.599	449.848	343.35	647.477	349.963	301.294	364.367	221.937
157	Unknown	–	–	–	1435	1.82	2000.51	5.67388	–	62	73.1051	33.7671	13.676	9.58483	2.94278	4.58394	63.8743	24.6301	6.62475	5.89022	17.2045	28.847	271.199	793.164	45.5447	55.4518	64.153	45.2269	6.39454	10.4484	13.1856	5.69661	19.4558	31.2049	109.37	–	14.6081	8.49035	116.724	42.0526	20.2597	7.37525	13.475	16.7747	98.8317	45.6853	12.3613	38.8237	1.74961
158	Unknown	–	–	–	1435	2.1	2000.91	20.9094	–	111	106.447	47.2814	101.503	45.9743	76.037	50.7658	157.474	30.2661	86.2728	142.307	151.756	78.4303	130.827	203.541	78.0086	132.86	364.811	142.931	29.2176	41.0521	56.7629	49.2098	130.915	73.6327	183.234	28.7844	465.587	90.4258	335.19	179.156	141.985	100.664	104.126	69.3879	110.328	122.61	172.637	244.87	85.7252
159	Unknown	–	–	–	1450	1.72	2021.8	6.27876	–	105	48.2874	34.1051	24.3393	19.4198	21.0683	10.2422	41.6141	26.02	20.1603	19.8097	39.5436	35.4365	463.063	721.384	49.7898	37.0038	56.147	51.58	14.5456	14.0825	397.312	143.063	38.0798	26.2023	21.163	9.58217	49.0406	25.2721	188.245	71.8949	42.9261	23.6254	46.4305	42.31	57.6587	21.8776	57.8164	66.2675	20.8044
160	Unknown	–	–	–	1465	1.78	2043.31	5.04631	–	119	35.6307	27.5888	35.7545	19.7044	13.7538	–	21.4538	45.5469	–	18.7944	18.9627	9.14571	47.5755	75.165	41.1058	57.8164	99.2009	77.7183	25.6682	9.64205	45.0732	18.1233	0.770237	25.4059	60.6114	7.5458	43.2136	1.25682	97.5542	41.9603	28.1623	33.7053	54.0009	10.7079	46.0958	29.5995	32.4837	22.8077	–
161	Heneicosane	hydrocarbon	–	629-94-7	1505	1.49	2100.03	1080.68	296	169	15.5061	23.7858	40.2138	20.5935	19.829	5.91484	31.6321	28.5376	1.96385	17.1337	16.1238	18.1384	45.2105	47.548	114.191	82.992	48.5103	79.0712	21.8299	31.6554	32.8935	16.5141	17.191	16.1579	30.3752	15.495	34.4065	16.2715	8.87026	10.4098	30.1583	16.6809	27.8723	20.2735	60.6536	23.6154	16.3291	22.3267	7.35108
162	Stearyl alcohol	alcohol	–	112-92-5	1510	1.69	2108.03	8.01354	270	165	271.697	194.481	10.6008	7.14194	6.47394	11.8931	14.1823	13.7226	6.73453	3.08805	28.1956	–	12.4234	29.9774	66.6693	157.504	27.7352	25.7219	–	8.51697	1.89599	–	17.324	3.80883	21.6471	10.8975	9.38124	18.9328	210.371	116.552	3.2342	3	7.33245	6.27878	24.3045	5.52362	16.1178	13.8785	1.71058
163	Unknown	–	–	–	1515	2.06	2116.29	15.1232	–	85	2880.31	1821.75	824.038	346.211	846.178	401.286	1651.08	400.987	1186.67	1376.38	1508.83	1206.02	952.147	1350.53	925.393	1231.81	1454.92	987.28	397.848	402.991	655.792	601.751	1504.64	561.174	1704.03	370.613	2624.06	531.031	1116.83	941.263	1406.97	1374.23	997.407	468.712	1057.91	1518.99	1490.96	2049.46	1060.9
164	Unknown	–	–	–	1535	2.16	2147.2	23.6406	–	99	269.073	164.917	355.164	172.243	232.759	162.684	658.882	273.77	315.82	436.689	406.067	444.497	463.185	538.24	356.49	207.403	483.505	243.822	110.56	174.654	407.942	309.346	401.908	187.969	458.222	128.982	902.079	198.2	371.86	305.345	356.061	488.171	343.134	182.888	438.634	649.083	541.223	642.832	486.354
165	Dodecyl benzoate	aromatic	–	2915-72-2	1540	1.86	2154.43	11.3996	290	104	64.0539	68.6465	25.8729	16.3573	20.151	4.83477	45.7152	7.48414	28.055	39.5906	30.6194	34.1262	49.3686	47.2162	47.2003	22.2096	42.5037	52.2568	14.9375	15.4892	17.4731	25.4052	49.8876	9.02329	67.0732	14.1643	29.1657	14.3373	57.9286	46.5795	35.0679	57.8157	43.6128	18.1557	47.0282	37.8643	71.6733	94.9434	24.0339
166	Unknown	–	–	–	1555	2.21	2178.04	7.66847	–	133	391.525	284.135	136.289	87.2043	23.0393	10.0206	32.3588	45.2209	29.9705	24.2109	23.9721	29.4351	49.6653	53.2808	62.7572	47.4693	107.345	106.616	17.112	42.338	53.0947	26.9887	16.9854	3.65602	24.33	14.8638	71.4935	22.2049	363.506	109.245	142.003	117.249	55.1852	19.1615	335.295	116.859	64.2763	88.8403	12.8698
167	Oleic acid	carboxylic acid	–	112-80-1	1560	1.74	2185	11.4686	282	163	246.474	187.578	184.765	124.81	107.53	51.4737	75.9492	92.3564	96.218	110.048	207.933	156.663	111.123	187.369	301.11	182.296	265.513	272.708	82.2096	192.222	179.705	110.389	132.466	140.979	258.027	54.9727	231.764	87.1073	733.963	210.011	227.379	117.139	249.062	134.121	302.277	172.607	139.979	145.13	146.928
168	Hexadecanamide	amide	–	629-54-9	1560	2.07	2185.51	14.55	255	59	1565.77	483.041	648.761	371.38	237.559	104.752	1405.39	518.908	475.326	398.525	521.132	1114.48	440.721	831.255	1152.15	508.302	1434.96	732.434	324.268	219.584	1446.21	946.786	1996.94	1843.53	5142.32	228.271	3627.85	350.258	1205.44	509.586	530.297	503.374	1853.22	634.573	769.271	731.203	3581.69	4994.46	4239.35
169	Unknown	sterol	67, 79, 91, 135, 270	–	1565	2.11	2193.26	10.8667	–	121	417.159	279.012	277.919	172.44	18.8583	6.79153	11.7864	7.47993	24.5627	16.3001	30.6114	22.8073	547.862	409.281	451.201	258.174	356.609	498.426	196.86	342.162	8.23309	29.7168	34.613	21.477	44.0359	29.0931	46.5529	10.5853	147.6	33.8507	45.2748	6.71657	42.3018	30.5642	76.1311	40.0845	19.6192	19.169	16.0643
170	Docosane	hydrocarbon	–	629-97-0	1570	1.52	2200.05	109.73	310	127	347.788	254.889	218.296	241.567	59.4755	41.1184	108.578	105.715	64.9561	91.0951	128.564	105.263	309.998	375.726	721.885	453.043	315.096	596.855	186.755	341.119	138.745	65.9993	125.234	76.9346	145.383	43.853	131.745	72.006	416.516	400.559	172.467	203.78	116.425	127.93	193.77	124.85	75.2927	95.7385	71.7279
171	Unknown	–	–	–	1570	1.87	2200.58	4.42628	–	88	26.1016	8.52096	7.10911	4.52495	2.70681	16.3302	15.8962	9.04125	15.2706	14.0379	16.5473	16.4489	31.2178	73.2076	5.89953	13.8694	17.684	25.5795	–	16.8603	9.02839	31.3892	4.79463	5.17077	10.3018	10.9128	1.73808	0.754491	26.7751	7.32291	11.1564	8.12508	15.5644	9.44755	31.1943	9.22488	1.46507	15.6487	7.19406
172	Unknown	–	–	–	1580	1.97	2216.12	8.43519	–	119	178.114	141.116	40.8002	18.0166	11.3952	7.38856	8.73054	24.0539	14.6806	14.0876	12.5269	6.42182	64.5003	49.0712	43.9854	25.9355	44.6673	55.153	22.2349	51.3985	26.2003	16.0971	13.1118	4.6731	1.98314	10.9561	16.2688	21.986	28.3267	20.0279	1.60413	15.5442	13.183	–	24.1943	1.07053	11.6225	19.984	7.33777
173	Unknown	–	–	–	1580	2.08	2216.29	7.77275	–	149	310.093	210.449	188.213	118.826	–	18.6467	11.6729	11.6633	5.90242	0.741628	11.0415	0.331337	354.16	244.945	289.428	187.494	208.504	384.075	135.749	256.623	14.9308	14.8064	4.03349	–	18.3921	–	17.731	22.4977	43.5686	–	15.6181	0.805057	10.5301	5.47749	0.969395	0.232646	12.4937	6.74118	2.70348
174	Dodecyl benzoate	ester	–	2915-72-2	1585	1.94	2223.76	5.85272	290	93	656.959	200.5	94.1337	58.0087	13.8955	9.46751	38.6687	45.8676	16.0856	12.4904	38.7019	48.8051	146.244	134.52	123.302	78.2162	139.633	163.856	55.7385	89.3992	36.3253	27.4192	62.9222	24.6021	41.7501	9.23775	55.3812	21.7232	145.413	64.2335	33.2524	24.6727	40.5788	33.3566	71.316	29.4997	26.3001	54.9834	29.9108
175	Unknown	sterol	67, 79, 134, 201, 270	–	1585	2.14	2224.07	10.6475	–	163	463.648	249.178	238.56	148.996	10.8967	10.523	7.9348	–	–	9.81859	9.39499	6.66667	564.003	382.19	427.411	237.727	342.047	537.947	192.656	370.66	15.171	17.8709	13.1038	4.39188	–	–	6.22422	–	31.9022	28.5329	7.28587	13.1896	23.187	22.6185	9.44578	–	5.40297	9.40186	12.1499
176	Unknown	–	–	–	1595	1.72	2238.8	4.03659	–	91	16.4125	13.8496	14.5023	13.8133	17.3553	7.07341	28.9461	19.9215	2.07341	17.1209	20.5569	31.6374	120.536	224.829	349.812	191.828	65.6301	41.3493	8.63761	27.7418	54.4937	24.2781	27.8616	2.02107	33.356	–	36.5349	19.2369	190.522	70.9321	59.369	29.8603	39.8037	26.159	53.4318	45.344	33.13	46.4391	3.25482
177	Unknown	–	–	–	1595	1.79	2238.91	3.9931	–	137	71.3819	17.1615	17.6121	11.6853	2.38279	–	16.2349	19.8838	12.5536	21.8623	22.6773	18.7631	13.0067	63.8011	46.67	27.1065	14.0918	16.7348	8.6436	13.3001	17.3573	8.92038	31.8962	1.15924	28.2695	8.94278	21.9222	18.3014	70.4704	17.0836	29.5243	25.5635	19.1384	9.10823	31.367	3.90885	11.4271	1.20248	1.38168
178	Unknown	sterol	67, 79, 91, 105, 135, 147	–	1595	2.2	2239.54	7.03461	–	147	204.624	140.776	151.24	100.348	10.2967	18.6208	16.8816	7.58882	7.70126	11.8543	5.27988	9.44578	313.354	219.626	205.504	117.52	182.287	301.462	125.651	228.547	11.3367	1.62675	11.4143	0.287869	13.2861	4.3371	22.328	6.25261	30.7525	9.79641	5.94522	12.827	10.5105	18.1763	13.5263	31.5968	17.5731	11.1249	9.43047
179	Unknown	sterol	67, 91, 135, 160, 200, 240, 268	–	1600	2.29	2247.37	8.32288	–	103	332.565	198.039	189.195	134.663	–	10.7957	7.80794	3.39521	19.5937	12.354	4.84032	–	407.523	225.147	293.51	158.395	252.558	353.775	120.762	234.967	1.91528	5.07075	13.7922	14.7104	21.9202	18.2668	5.44999	16.6008	11.326	5.74318	11.5167	9.25394	–	7.66755	10.3965	–	3.57352	5.89887	–
180	Unknown	–	–	–	1605	1.86	2254.4	46.0675	–	117	468.811	259.352	467.84	181.897	202.947	43.4174	634.952	125.918	232.727	344.234	319.741	278.296	461.499	453.18	688.29	299.425	249.034	542.595	337.18	315.16	265.697	179.544	608.432	143.43	885.214	90.2451	430.528	103.673	920.001	311.253	527.57	245.017	422.434	146.006	477.148	256.875	693.769	673.657	305.436
181	Unknown	–	–	–	1605	2.03	2254.66	21.6673	–	147	53.9561	19.5655	38.173	15.7492	265.136	10.5795	140.699	50.6434	18.9721	26.9255	114.396	67.1657	72.8044	69.7073	33.9554	36.9055	38.4897	49.1717	19.5465	27.7265	140.059	76.6871	133.472	10.4192	12.1264	61.9062	46.9426	21.2517	105.792	41.8443	217.173	70.8689	31.0353	75.4185	344.233	212.475	14.7456	19.2444	7.39055
182	Unknown	–	–	–	1615	1.58	2269.35	4.90898	–	199	34.9634	11.851	5.79441	3.77711	11.2191	4.6161	–	–	0.231315	14.2659	21.5096	1.2413	12.0927	21.1954	52.4145	18.7498	42.6294	29.2743	14.0235	8.41983	0.947882	38.9106	12.0632	29.157	52.9472	17.4112	39.5445	1.81504	26.9887	12.6097	14.2209	12.945	54.8829	8.9796	18.6939	11.4777	27.9765	5.05522	13.149
183	Unknown	sterol	67, 79, 148, 174, 201, 284	–	1615	2.08	2270.12	9.84359	–	93	530.096	357.631	339.001	190.165	1.62031	11.9029	20.5855	16.6094	11.8341	18.666	15.342	23.0486	740.34	529.718	527.446	316.77	440.306	702.5	279.367	481.806	23.6341	39.7285	13.9226	–	13.4879	4.68264	17.2688	16.8594	59.9843	32.7878	24.3633	18.8774	1.54469	11.0714	47.6647	26.7878	17.9794	6.05744	15.5609
184	Unknown	–	–	–	1620	1.62	2277.1	7.63533	–	151	21.6946	9.88157	23.3812	10.2404	–	7.224	9.78377	15.3081	20.7869	20.3058	12.3074	3.40519	19.0739	49.9867	84.4797	54.9015	44.6886	28.9315	10.6208	7.90308	3.00643	18.7132	14.0459	–	14.1444	13.7678	27.1162	10.8955	76.5422	41.876	30.1557	28.0539	10.3438	2.92349	22.6915	13.1701	36.513	18.108	14.5017
185	Unknown	sterol		–	1625	2.33	2285.88	9.50711	–	145	291.284	158.868	194.444	103.059	17.4522	1.99601	12.9501	1.0723	17.2182	8.3187	11.929	1.27279	361.014	245.662	292.84	159.863	229.528	357.502	109.695	230.666	21.2091	10.3555	1.61411	2.60058	1.53094	–	2.33666	3.58816	7.44245	2.40053	13.1495	11.2721	10.6334	24.5449	7.37591	10.4629	7.73653	16.8672	19.9264
186	Tricosene	hydrocarbon	67, 91, 148, 201, 268	–	1630	1.72	2292.63	21.1282	322	135	161.877	108.834	145.456	84.3147	76.9171	24.1949	54.5003	59.3114	72.9787	85.4178	161.416	116.299	67.6747	115.254	147.542	80.5955	111.66	146.842	57.3271	125.762	116.828	75.8419	118.221	72.4531	129.62	57.0579	140.654	58.2311	222.472	83.8955	163.536	109.246	98.0013	83.9694	199.331	100.243	60.0111	76.2932	74.8709
187	Unknown	–	–	–	1630	1.79	2292.74	16.3477	–	117	432.462	380.015	1583.29	903.669	118.665	30.8869	852.728	705.299	108.102	91.6023	363.54	203.834	1651.2	175.336	814.376	94.1277	364.305	59.2766	151.355	61.1745	1176.08	623.91	682.882	208.892	198.908	85.0386	635.761	220.203	1224.09	486.311	709.102	360.073	461.322	110.342	1679.31	555.033	672.2	795.189	344.871
188	Unknown	–	–	–	1630	1.94	2292.97	7.55353	–	93	213.435	64.8436	67.004	59.9421	18.1725	–	68.7019	124.987	16.3061	30.4713	24.3524	17.3134	90.7152	688.083	133.535	59.5283	63.8962	92.2981	29.9973	56.8297	38.7645	71.4165	35.6868	24.1905	43.7884	27.9261	45.2395	14.153	157.29	60.7975	50.4872	50.1211	35.3407	31.4047	79.2985	25.4325	18.3265	47.6487	15.7088
189	Tricosane	hydrocarbon	–	638-67-5	1635	1.53	2300.03	117.776	324	113	1319.17	526.604	656.22	590.99	163.464	76.1856	553.506	307.444	143.793	179.02	369.08	201.989	1018.46	1167.65	1520.65	920.865	936.669	1638.37	518.382	930.248	235.123	110.469	233.086	119.31	306.301	166.928	353.693	125	926.978	398.216	457.935	1127.06	443.782	319.476	619.237	303.249	328.436	328.06	370.198
190	1-Eicosanol	alcohol	–	629-96-9	1635	1.68	2300.28	14.7973	298	133	166.567	39.8468	59.7119	16.4325	66.2049	10.3586	35.4602	36.3573	51.3886	27.5724	98.7292	37.98	42.7232	74.3393	43.6396	6.53759	38.3034	25.7179	32.2954	9.13551	132.949	35.2389	93.2952	43.1929	99.1517	15.0967	62.7618	10.2555	194.894	38.6367	100.004	33.5356	19.6769	42.4085	137.274	44.452	18.6707	52.6855	19.8929
191	Unknown	–	–	–	1635	1.9	2300.65	11.49	–	116	107.967	50.7718	165.918	110.957	33.2542	17.7285	155.53	154.976	32.4431	35.8142	58.9536	48.6307	225.19	91.2156	85.4844	43.7583	12.2202	7.21978	30.5722	3.39166	229.206	138.059	85.2974	25.3373	26.4265	39.3932	83.7685	80.6667	318.441	114.466	112.672	95.6775	50.0821	26.0661	251.295	118.618	71.6607	127.331	72.5105
192	Unknown	sterol	67, 79, 91, 201, 254, 282	–	1635	2.2	2301.15	7.72978	–	94	274.613	205.947	232.941	137.126	–	5.07585	23.9554	21.2122	10.7246	5.57441	5.34087	8.41096	362.808	278.849	308.701	184.287	222.348	394.502	160.127	271.074	20.1204	17.515	20.2732	13.4551	8.62076	14.4258	28.4342	25.5179	60.6467	16.9115	12.1983	12.1277	12.5848	21.3888	26.4083	0.791085	24.6593	21.4884	2.27367
193	Octinoxate	aromatic	–	83834-59-7	1655	2.23	2334.52	11.2679	290	162	135.158	105.598	85.01	60.171	11.5274	12.3464	16.8117	20.1364	22.2814	8.75006	–	15.1856	26.5183	25.5309	23.6181	10.2076	17.7381	37.0736	–	22.4722	7.70792	9.16012	13.8676	3.56487	–	11.8621	8.41317	3.79707	84.4371	27.8922	45.4804	37.3094	27.1311	12.7339	162.633	57.2222	174.699	192.991	6.9501
194	Unknown	–	–	–	1660	1.51	2341.65	6.31314	–	98	197.765	100.224	112.76	54.2954	22.0958	9.15192	85.8416	79.1663	33.7285	44.5225	47.3081	50.5391	139.502	164.925	623.379	425.981	402.024	321.822	49.7359	74.6966	73.6613	36.3593	80.0013	94.831	206.299	20.1856	211.625	52.7645	400.114	183.152	88.2082	98.1923	250.682	40.4274	172.901	72.4578	223.591	84.5955	98.0366
195	Unknown	–	–	–	1660	1.55	2341.72	5.89642	–	100	18.2202	10.2528	16.5704	10.1903	2.04657	–	–	10.436	8.22644	2.75782	7.8829	15.3615	18.387	22.0805	52.4351	43.0291	38.8543	10.5489	–	26.5476	3.58084	–	18.9927	–	9.79907	5.31005	15.2389	13.3948	47.8782	33.0894	8.79241	20.1182	28.635	10.7132	14.1277	3.6161	18.4249	9.18297	1.80705
196	Unknown	–	–	–	1660	2.01	2342.49	5.75873	–	88	–	10.0361	0.618319	6.83167	6.86893	–	0.212908	14.9674	9.0244	0.755822	–	6.40519	5.49213	0.686627	8.16057	–	–	–	0.0798401	5.43779	–	5.79907	8.57219	4.20492	1.12841	2.14904	3.36061	14.3506	2.7536	4.17631	5.61078	12.004	8.86605	–	12.9321	–	–	6.91639	5.38589
197	Unknown	sterol	67, 79, 91, 105, 165, 181, 274, 300	–	1660	2.49	2343.29	7.9764	–	109	105.609	26.1124	80.3586	7.41184	57.9512	29.5895	106.647	13.3273	73.5356	86.8051	79.7598	70.7552	8.91351	16.6806	33.0353	30.7997	32.8995	67.024	19.4648	21.9135	29.3167	46.9182	77.8337	86.2861	165.341	22.0758	114.708	46.1781	130.925	74.4983	78.9388	72.8743	141.11	57.7873	93.6394	76.8596	23.3307	25.275	24.6496
198	Unknown	–	–	–	1670	1.63	2358.51	3.9003	–	151	22.2196	11.3748	16.4597	18.0286	10.2056	3.29674	11.9408	9.10512	6.86361	7.22511	27.9501	20.1564	2.62941	43.0672	73.1657	81.0126	27.6134	16.9022	10.0885	26.776	21.672	12.3985	18.0878	15.621	14.7405	21.6631	5.91617	8.77933	69.8663	42.0599	18.0033	22.9042	14.0333	15.6374	20.517	–	13.7873	12.1036	8.97405
199	Unknown	–	–	–	1670	1.89	2358.95	9.53056	–	117	83.4138	62.7591	120.643	89.2455	18.7787	5.67199	80.0845	65.3167	39.9734	49.9414	40.5411	33.8751	125.261	111.218	117.122	59.4418	43.0712	53.3617	42.998	77.2865	75.9395	81.4258	50.0184	20.5815	81.479	26.0444	57.0366	16.1741	152.56	92.5063	40.1291	85.6374	55.6833	33.1697	93.4005	56.6873	29.1683	62.1051	22.6139
200	Unknown	–	–	–	1670	1.95	2359.05	41.418	–	114	179.735	113.623	176.906	94.9554	169.353	62.6813	340.354	71.9088	139.429	169.864	242.763	220.926	275.672	236.525	274.217	155.623	241.866	261.374	97.3225	151.538	148.295	135.963	203.35	86.9862	385.198	64.1852	303.765	83.1424	418.791	175.438	222.68	224.657	187.558	147.436	332.812	205.336	253.625	261.11	204.764
201	Unknown	–	–	–	1675	2.16	2367.73	28.4138	–	99	186.713	77.7572	130.603	70.0526	240.158	97.246	418.225	123.023	186.604	326.115	278.01	305.055	222.332	241.092	187.556	177.155	147.198	118.76	83.9468	86.0033	161.289	152.375	217.926	122.58	513.939	67.6307	676.53	131.26	495.127	221.285	273.917	256.371	249.273	145.327	227.89	328.018	560.532	491.685	410.583
202	Unknown	sterol	67, 79, 91, 201, 227, 282	–	1675	2.33	2368.01	10.2853	–	93	349.902	235.554	248.339	153.979	–	7.25638	11.9335	21.7918	–	–	9.79042	10.1215	451.082	329.327	330.832	180.062	314.492	457.361	169.91	331.217	23.5924	10.6425	2.64471	0.959414	20.6758	6.25416	35.3207	15.4475	19.4879	10.2777	12.9654	8.14305	14.613	10.5722	10.4132	21.1107	35.6558	21.7374	7.09337
203	Tetracosane	hydrocarbon	–	646-31-1	1695	1.55	2400.03	19.8586	338	40	306.528	82.1098	257.265	202.429	101.077	44.2854	374.226	101.73	70.9182	74.3686	116.204	97.1874	338.289	356.199	431.484	209.787	288.313	311.539	138.436	216.539	39.6489	6.50432	79.3143	54.6928	203.313	267.45	135.854	45.98	296.606	138.937	219.893	956.378	214.699	78.98	226.711	152.85	293.545	336.019	503.745
204	Unknown	–	–	–	1695	1.84	2398	117	–	212	280.999	156.032	335.165	140.139	275.52	122.187	255.187	113.898	236.619	284	285.375	289.361	214.174	346.881	305.821	148.48	174.366	328.482	124.361	323.914	306.26	138.164	285.862	163.981	324.255	137.514	314.686	194.208	648.125	266.716	363.492	253.481	284.939	216.223	380.374	308.74	232.835	315.883	293.866
205	Unknown	sterol	91, 119, 152, 165, 181, 314	–	1700	2.49	2409.93	22.0748	–	41	2142.68	1745.45	956.818	943.298	501.808	224.112	361.152	447.337	512.025	596.345	1085.67	1013.29	678.447	992.813	1165.07	603.1	806.401	1236.37	392.259	1177.59	801.367	366.593	679.884	516.451	1180.99	373.053	1010.22	412.953	2685.56	1131.54	1225.83	1095.02	664.134	1538.64	1490.32	1310.49	490.786	546.271	592.855
206	Unknown	–	–	–	1705	1.43	2416.49	4.95388	–	73	445.093	177.664	332.998	105.739	51.1677	36.9707	215.163	91.5023	87.9933	91.2362	94.0579	129.291	1366.83	866.473	962.953	527.083	1050.93	609.741	139.424	136.299	191.547	91.1484	182.654	216.963	984.446	82.6953	853.879	108.066	777.855	262.73	191.963	136.655	1062.99	81.6494	330.773	184.622	679.333	171.056	234.903
207	Tetradecyl benzoate	ester	–	70682-72-3	1715	1.99	2434.08	8.93393	318	108	145.251	79.4657	28.7232	13.5489	4.16367	8.8534	23.2269	–	11.0146	9.04524	14.183	6.99956	31.4378	30.9534	29.5649	15.8798	8.87625	33.6593	0.281881	34.9428	17.2448	19.5063	24.4844	10.4731	14.7026	16.7438	31.9993	19.5793	52.5921	30.6587	7.62763	25.7549	14.1178	20.151	32.7698	24.3054	17.4797	35.2628	20.6012
208	Unknown	–	–	–	1725	1.41	2449.78	4.23553	–	55	684.031	298.818	487.403	173.088	69.9488	13.4356	273.951	135.651	95.9168	110.81	92.9634	168.147	458.432	516.472	1354.88	583.664	1761.9	942.212	183.705	153.568	324.503	163.494	162.826	328.33	1132.02	80.1929	942.395	155.872	1054.71	397.06	207.776	170.541	1171.15	136.766	433.2	260.776	985.136	230.296	395.315
209	Unknown	–	–	–	1730	1.63	2458.47	3.66778	–	70	620.297	417.42	77.9581	54.7419	50.9927	26.8902	187.627	301.486	49.1351	102.933	93.6128	102.972	135.758	196.607	644.711	586.222	173.663	179.622	34.8975	56.7578	73.4804	44.4185	113.185	38.5343	130.182	36.7824	93.9222	31.6287	1320.56	432.339	142.487	185.096	98.8836	74.3779	170.04	114.845	100.573	136.369	133.878
210	Unknown	–	–	–	1730	1.9	2458.92	46.8472	–	61	247.837	213.937	284.812	228.496	203.973	81.3959	323.805	139.375	143.496	200.456	170.948	158.454	278.594	397.726	303.869	195.118	88.8751	200.252	211.019	324.144	193.199	128.824	230.721	107.105	549.064	48.6585	329.238	86.5975	565.03	204.987	270.222	223.514	273.987	126.919	209.465	191.418	199.941	269.019	157.448
211	Unknown	–	–	–	1735	1.54	2466.65	3.50339	–	42	428.853	167.033	255.353	183.201	108.001	61.2289	245.142	182.143	96.2721	130.285	194.733	106.755	385.772	377.776	1598.96	1188.98	393.894	547.633	153.584	273.219	115.223	72.664	156.088	70.9461	263.858	74.7578	178.558	71.4252	635.919	247.115	272.269	279.979	197.892	84.0552	422.16	165.11	284.522	352.534	335.931
212	Unknown	–	–	–	1740	1.7	2475.25	6.81686	–	127	18.3446	6.05456	10.8576	16.5917	8.8849	3.49701	6.57751	24.5642	0.181193	10.2187	4.78377	5.89754	18.9874	30.6953	49.3797	44.6066	256.223	196.74	–	11.1213	17.7572	25.4294	25.0852	6.27079	9.65003	3.90752	18.3089	13.9481	84.6946	39.7931	101.033	142.763	36.2056	18.7155	53.5476	15.9259	19.67	29.5296	5.98736
213	Unknown	–	–	–	1740	1.86	2475.51	11.9634	–	121	29.1184	32.6347	54.4012	34.8916	2.68796	12.0958	56.0053	54.6174	5.28055	13.3839	35.9707	14.9381	65.1404	45.6946	65.1537	54.1763	46.2675	59.35	12.2029	15.8283	38.8279	15.2335	48.7478	15.8244	32.5369	6.04391	44.2222	13.2479	123.592	45.5888	53.1384	51.3506	43.648	20.2774	81.2601	15.9395	43.6134	56.3899	24.9998
214	Pentacosane	hydrocarbon	–	629-99-2	1755	1.77	2500.35	19.6367	352	135	164.824	140.906	180.331	152.781	86.4411	45.6418	78.509	107.732	103.499	105.609	201.918	145.08	80.2837	157.773	189.067	99.7472	114.315	186.371	68.2422	178.18	135.783	66.7631	135.267	57.7281	174.216	83.5482	129.67	63.01	268.208	112.204	217.546	145.298	121.752	163.749	254.394	132.591	93.8696	98.5476	133.291
215	Hexanoic acid, heptadecyl ester	ester	–	–	1755	1.82	2500.43	26.6371	354	203	67.8405	50.1218	174.971	120.781	18.0838	22.6068	134.134	99.2202	20.5928	40.1444	51.0985	43.662	143.774	42.2912	119.803	31.3253	87.4252	19.6554	19.6307	12.3786	112.075	64.279	84.7139	32.6414	90.6986	8.6986	131.898	37.5263	279.574	133.596	122.762	79.185	88.6613	27.0925	268.537	109.731	90.4531	134.786	68.3806
216	Unknown	–	–	–	1755	1.93	2500.62	11.8644	–	151	24.2142	17.819	17.1905	10.118	11.8809	–	24.5631	15.3081	9.97804	9.9155	24.1238	4.29807	20.5037	95.839	29.7898	24.1027	17.6733	18.8856	–	4.25926	16.9727	5.97405	20.2721	2.81481	13.9175	23.9488	6.65957	17.2801	43.4631	10.642	7.97006	14.0299	3.29563	–	14.1881	16.6279	18.729	28.2637	13.0073
217	Docosanol	alcohol	–	661-19-8	1760	1.7	2508.57	11.252	326	70	283.489	163.646	675.576	406.272	8078.77	2678.23	271.57	210.38	114.583	113.52	208.894	147.699	455.897	634.82	803.667	517.412	506.758	600.567	125.645	184.839	235.766	111.508	249.674	112.518	270.027	183.741	1624.95	672.288	1144.43	436.58	5779.43	5969.26	601.381	347.993	16810.3	2630.7	727.378	1216.17	432.796
218	Unknown	–	–	–	1770	1.81	2525.41	8.3306	–	93	52.9514	17.8982	31.2761	18.833	11.7924	13.3185	46.5083	29.4844	24.4229	33.6228	44.3426	34.3932	65.5529	78.477	119.644	84.9661	46.2384	49.7478	3.02595	3.58261	34.4232	13.6713	50.2366	7.15369	25.1506	10.5673	62.7285	12.126	147.678	40.8397	50.8037	56.2342	23.136	36.2601	75.525	44.1796	53.2972	51.8157	60.9614
219	Unknown	–	–	–	1775	1.75	2533.64	42.9325	–	74	101.096	92.723	124.008	107.25	250.242	81.2488	655.157	96.8177	151.55	198.562	227.076	229.114	202.222	215.436	189.986	149.924	173.114	194.196	98.9807	123.898	125.765	122.671	149.242	90.7738	339.834	107.655	975.81	131.184	712.696	241.937	310.273	218.572	252.142	165.953	346.516	429.368	261.945	89.7033	183.303
220	Pentadecyl benzoate	ester	–	–	1775	2.02	2534.09	4.78701	332	93	408.269	194.05	51.2888	33.4052	12.8716	16.8277	52.2655	35.9454	6.45265	1.1293	35.2216	39.1823	84.2595	103.275	129.116	46.6154	120.134	113.319	–	13.9523	73.5629	38.7898	53.2535	20.1943	36.544	17.6942	148.144	22.7285	188.079	50.1124	39.7618	40.4711	40.6926	33.6434	87.7831	50.4185	31.2318	30.5842	37.7399
221	Diisooctyl phthalate	aromatic	–	27554-26-3	1780	2.12	2542.59	21.5692	–	85	561.961	338.844	319.562	210.412	653.89	242.326	1054.61	313.213	489.327	675.987	891.162	694.082	480.382	905.222	577.02	512.883	473.124	432.246	311.833	317.583	382.993	386.777	532.607	264.344	809.723	169.001	1576.39	337.786	1621.02	574.172	738.288	621.645	556.933	412.371	497.987	1095.5	1166.87	542.983	692.896
222	Unknown	–	–	–	1780	2.57	2543.34	10.1647	–	143	321.37	152.849	238.345	201.645	12.8623	1.52606	7.15125	7.08117	8.47106	–	4.86072	–	362.488	353.512	294.44	155.935	204.983	418.297	164.287	311.293	9.50033	1.90486	–	26.2974	18.8827	2.17099	49.5569	22.4464	11.5569	–	1.14061	4.00599	10.0991	–	8.63207	4.1151	14.7572	–	–
223	Unknown	–	–	–	1790	2.1	2559.22	10.3839	–	101	102.311	25.7232	29.9142	2.32335	1.65269	9.34797	46.8456	24.1601	11.206	14.9814	10.9386	23.9716	59.5343	216.361	53.2462	21.8317	39.8663	16.9142	3.75183	3.42315	23.849	5.2668	29.2621	9.97472	36.2575	–	45.7818	0.565535	83.3526	35.5478	24.8629	29.165	10.517	19.2284	41.1978	33.3466	13.4056	10.7432	25.8836
224	Unknown	–	–	–	1800	1.73	2575.27	10.9193	–	61	71.6267	53.0625	120.849	120.114	36.5469	9.75981	91.7658	67.9607	28.5218	14.6773	49.2043	42.0546	153.345	188.844	80.4484	40.8104	97.8401	41.788	11.0426	27.2236	125.872	63.1557	75.9694	23.65	75.7864	10.5263	144.331	67.2894	371.003	112.322	193.263	97.6236	64.6347	36.3932	194.435	64.477	54.1178	47.7552	44.6574
225	Unknown	–	–	–	1800	1.78	2575.35	11.5957	–	84	264.969	227.155	384.597	374.47	92.4059	36.7516	461.217	625.855	70.809	100.83	314.025	241.11	480.417	322.989	361.145	151.43	169.183	175.945	40.9514	74.9426	677.729	449.836	457.637	197.548	155.389	55.2142	813.942	354.677	945.475	348.532	859.22	417.82	229.884	128.259	502.878	197.643	204.285	271.391	138.34
226	Unknown	–	–	–	1800	2.21	2576.07	34.2282	–	99	135.362	64.483	94.4997	72.1444	167.348	82.9029	341.454	76.8676	125.178	196.386	267.751	216.405	184.645	172.09	164.225	134.393	117.506	66.6354	74.6148	84.9867	119.588	131.346	123.941	81.5642	266.775	42.2229	396.47	119.065	401.365	182.8	158.703	163.388	130.648	112.743	129.873	301.667	358.485	127.492	240.167
227	Unknown	–	–	–	1800	2.63	2576.77	3.53562	–	117	76.9641	36.336	7.26148	42.7124	13.0497	–	25.3974	12.2102	4.68197	4.9257	7.21291	11.2701	28.0275	61.3586	22.7323	36.8596	38.9266	79.5449	14.0439	53.3839	2.24351	–	22.149	61.9612	17.2675	–	181.297	17.2779	–	8.73697	6.91972	–	22.4389	17.6724	12.8889	12.3688	9.47638	–	–
228	Unknown	–	–	–	1810	2.68	2593.52	7.57822	–	192	1397.14	569.665	985.466	858.198	37.3555	9.52162	53.1832	24.1721	22.5757	31.8483	23.6891	46.1406	1378.88	1269.61	1181.91	524.85	805.453	1514.9	549.691	962.653	31.1703	22.5498	46.4453	30.7578	141.996	99.664	134.561	26.2422	145.679	64.5285	49.6554	420.687	55.6365	48.2688	104.407	41.87	45.3174	103.913	84.6806
229	Hexacosane	hydrocarbon	–	630-01-3	1815	1.73	2600.32	12.8094	366	133	65.7399	60.7343	128.331	78.9222	31.1444	18.7971	117.943	74.55	42.6766	24.458	57.4538	36.3458	188.332	104.348	95.7833	19.7565	60.688	43.2023	4.50721	21.1011	137.98	57.4424	106.664	48.0393	93.3506	19.1118	97.7112	18.7272	278.396	136.799	105.608	53.2087	88.0302	36.5502	178.847	72.2386	47.0752	210.118	28.8104
230	Unknown	–	–	–	1825	1.96	2620.77	7.43629	–	109	54.6644	44.4198	42.0838	31.1444	17.354	5.59148	36.9255	55.7691	35.3593	23.7137	25.8649	34.2557	117.229	120.361	125.393	77.5988	81.8878	73.2768	9.14837	18.1759	68.004	30.5143	51.167	15.0872	32.1111	9.83633	67.6973	43.9517	2081.26	1026.38	56.2149	79.1883	26.6953	27.609	99.3453	39.674	61.2468	78.6707	71.9933
231	Unknown	–	–	–	1835	1.8	2640.44	19.5502	–	82	97.9421	176.818	259.094	181.52	156.293	59.7418	388.735	260.259	410.559	365.095	315.178	698.709	259.194	187.836	289.017	196.739	300.413	344.266	119.729	109.163	334.388	199.488	390.237	45.2329	127.363	354.623	128.522	412.882	684.371	275.303	319.538	294.923	1251.97	277.564	531.619	409.194	171.832	337.327	193.319
232	Cetyl benzoate	ester	–	22485-54-7	1835	2.05	2640.94	11.5413	346	81	165.033	129.524	189.707	141.027	27.0552	28.9953	112.684	145.746	55.4345	50.2508	70.4684	114.109	280.456	281.79	307.727	163.209	237.269	272.35	57.0142	71.1158	430.267	184.444	119.874	42.448	66.3772	42.8507	120.733	85.3253	551.022	181.815	129.322	90.5043	112.475	80.0126	226.148	110.914	106.645	149.743	118.727
233	Unknown	–	–	–	1835	2.72	2642.27	4.75187	–	119	480.844	149.443	359.783	283.036	0.233533	12.4731	8.46374	9.11111	6.64116	–	8.6354	6.1018	536.892	429.776	443.929	204.054	324.058	455.309	220.686	307.083	10.7518	–	–	9.64271	8.82036	–	–	10.1541	9.35862	15.012	8.39787	6.79153	4.88401	9.50322	20.3067	1.10357	–	12.1391	–
234	Unknown	–	–	–	1840	2.14	2651.11	34.5504	–	85	201.278	127.601	146.725	114.196	242.559	100.979	475.913	128.6	197.027	240.539	396.33	320.241	228.146	263.298	258.844	223.896	163.084	187.232	125.365	139.713	166.91	151.673	163.003	115.478	406.257	67.3826	586.391	144.861	592.176	199.941	328.678	301.969	243.096	157.83	235.617	414.519	351.683	210.074	290.079
235	Unknown	–	–	–	1845	1.86	2660.54	10.7709	–	105	19.2888	14.35	34.3826	20.7649	19.1104	8.42448	31.8303	25.1357	9.63872	30.3023	19.44	24.1983	144.517	200.985	60.8397	31.0133	25.0781	43.1397	8.78887	20.9641	34.9774	31.6048	26.2076	1.01663	22.1896	1.4562	36.8902	20.7815	75.7046	35.5116	36.3599	28.5123	12.7108	17.8856	42.5988	5.88113	39.5289	35.4398	43.3174
236	Unknown	–	–	–	1850	1.74	2670.3	7.01557	–	87	26.6813	10.546	30.3788	33.9335	9.24994	10.7345	32.2615	17.562	5.06786	2.53892	7.2189	16.4028	8.30007	15.8383	27.0499	9.09315	140.136	98.7212	27.2695	0.880461	36.8882	23.0739	17.91	3.45975	12.9561	10.5043	42.8463	23.2402	84.5788	32.68	76.3526	53.7937	30.6673	23.9268	50.6525	26.7325	10.5103	24.0798	18.9681
237	Unknown	–	–	–	1850	1.94	2670.7	41.6277	–	98	148.424	110.601	128.094	161.376	75.9062	39.7964	221.15	135.999	91.1078	152.709	156.022	188.94	184.294	165.115	248.052	135.664	140.74	120.126	117.443	120.544	177.278	111.309	105.955	88.0739	228.79	41.7764	331.244	119.651	582.592	277.157	240.067	180.262	192.371	131.631	272.095	254.574	204.982	162.375	168.418
238	Unknown	–	–	–	1855	1.76	2680.33	12.0164	–	138	21.0597	25.0563	11.4138	43.356	8.07518	4.44112	16.8392	24.6024	11.0191	14.0659	9.53293	12.8097	23.7343	41.5835	71.7432	61.0925	38.7638	39.8463	16.6055	10.9452	27.6826	12.9614	12.3171	11.9672	26.3812	13.8876	23.8024	22.3675	80.6015	10.7607	36.0585	35.7221	20.6826	19.9641	23.0193	10.5919	30.5635	45.5422	37.2841
239	Unknown	–	–	–	1855	2.68	2682.17	5.68674	–	152	9.02395	23.0461	15.9947	15.589	4.20093	10.2914	5.41583	23.9621	–	7.85629	2.00333	9.21025	40.0951	45.5276	48.3415	8.63806	56.9188	47.9301	13.4717	10.7008	60.9379	29.7709	26.66	7.24085	15.8177	1.97073	18.1051	27.1998	113.923	41.12	18.5116	8.16633	30.0785	21.1863	3.30472	–	3.40386	22.6494	1.53382
240	Unknown	–	–	–	1860	1.85	2690.51	13.1693	–	130	90.3061	66.8064	143.908	94.8927	34.4025	16.9871	126.524	65.1158	40.9288	60.4232	79.8609	49.6347	92.0499	40.1348	133.78	20.4675	115.846	69.3001	32.5316	19.4085	108.079	65.7119	98.3972	60.6021	172.816	22.171	250.367	46.3327	497.844	199.468	106.339	62.8283	296.543	59.7984	263.228	94.8436	85.7585	103.405	39.2801
241	Unknown	–	–	–	1865	1.87	2700.49	16.2546	–	117	252.326	174.208	303.713	211.894	80.1876	26.5023	300.906	211.922	106.414	115.975	189.069	148.052	304.388	130.289	375.289	95.2029	290.474	205.659	77.2821	46.6141	246.481	133.494	208.267	178.82	551.452	60.837	695.547	120.67	1055.34	481.106	261.566	144.779	709.045	137.279	575.673	261.675	270.492	224.854	125.25
242	Unknown	–	–	–	1865	2.9	2702.36	4.83346	–	91	556.107	167.526	369.272	290.709	–	3.23065	–	–	–	–	4.0947	–	537.959	350.707	512.805	166.863	368.86	496.431	201.221	267.396	5.70725	15.3327	7.06143	6.16301	–	10.1202	2.92482	–	–	3.88867	3.94278	8.70259	6.20027	15.6587	14.4691	2.56953	38.2096	3.5163	4.93413
243	Heptacosane	hydrocarbon	–	593-49-7	1870	1.65	2709.18	380	–	137	19.4405	21.3728	18.8017	26.6341	19.5697	4.79951	10.2508	3.92171	27.7645	31.1178	40.0546	32.6267	39.6622	58.9694	118.374	88.5576	27.1972	26.505	–	29.1816	34.4937	18.5835	27.7884	12.9474	20.6755	69.8206	18.0559	11.4431	105.544	43.0027	35.4757	255.045	33.8334	26.8237	44.8283	27.9066	58.8922	108.863	114.738
244	Unknown	–	–	–	1870	1.74	2709.34	18.2422	–	82	351.274	185.302	294.812	257.57	1254.91	460.701	478.932	252.806	151.017	243.173	321.827	227.466	430.574	445.191	705.023	350.721	441.718	414.729	123.353	181.627	264.673	147.446	237.152	88.5269	329.639	307.336	339.395	146.12	1053.86	405.929	700.107	1692.19	442.702	296.652	2023.98	576.531	590.079	1101.64	1043.65
245	Unknown	–	–	–	1870	2.29	2710.34	8.22169	–	81	239.616	105.058	205.212	148.933	7.00488	7.34952	5.80927	29.0925	14.6414	25.2684	14.5722	27.8749	309.601	281.945	270.291	123.147	168.327	290.488	119.885	163.66	13.3945	12.0335	25.5236	18.6766	26.992	4.8809	32.5622	22.6933	56.4853	32.0506	23.866	73.5595	22.8862	6.60346	42.8543	30.8583	34.7126	31.8916	45.1648
246	Unknown	–	–	–	1875	2.01	2718.92	21.6091	–	82	110.139	57.6593	41.3932	34.322	50.3491	23.1557	80.8283	34.0302	28.153	99.3699	57.7285	50.7119	173.821	199.848	152.417	77.7518	120.379	102.239	11.8479	44.4447	46.6061	26.3733	90.4165	27.4848	36.5305	39.9541	133.845	68.8004	255.627	140.25	84.4664	230.582	93.9055	48.9082	176.806	86.6159	143.182	121.68	125.704
247	Unknown	–	–	–	1875	2.37	2719.57	6.78755	–	67	506.321	219.943	375.58	337.997	6.41539	6.99335	14.9344	8.97228	10.3422	20.7197	23.853	6.70925	493.419	528.248	553.019	203.554	348.635	632.339	215.786	378.89	18.8215	27.332	2.46596	16.1524	35.6494	13.4411	42.6307	6.29541	109.622	37.6347	11.1863	105.169	5.42116	29.5181	48.9927	13.6509	34.7053	52.2961	55.8379
248	Unknown	–	–	–	1880	1.81	2727.64	52.7391	–	59	169.399	116.005	229.953	149.516	132.019	59.3573	320.891	85.7061	166.216	135.322	177.127	130.614	201.55	176.299	189.645	113.21	220.591	263.131	136.274	164.416	127.315	112.238	253.574	131.404	291.339	50.2606	201.409	81.9694	422.077	174.317	173.208	314.936	211.665	112.961	283.999	131.449	68.2209	165.707	87.3568
249	Unknown	–	–	–	1895	1.84	2754.95	19.1633	–	124	71.0093	49.3582	72.1244	86.6214	31.7569	7.22355	60.4418	61.4744	32.3174	48.4504	59.78	65.6707	105.849	93.9261	100.26	64.024	96.3466	89.143	17.2819	37.1639	218.22	98.0785	103.538	20.9927	35.8554	43.3067	83.7611	61.9022	131.892	76.4471	118.699	89.8756	73.8097	25.6815	103.29	59.5356	60.6208	99.4331	60.1417
250	Bis(2-ethylhexyl) isophthalate	aromatic	–	137-89-3	1895	2.01	2755.26	21.8865	390	82	117.466	125.054	105.619	105.816	20.6633	15.6471	139.341	213.743	53.4549	54.5977	62.3116	71.7199	87.4983	142.242	204.836	96.3007	222.654	246.935	16.088	51.3741	64.1191	49.2559	154.246	71.817	151.894	87.1031	383.646	102.864	343.975	120.022	264.033	152.572	106.13	83.9521	392.91	117.593	96.7325	114.462	83.2575
251	Unknown	–	–	–	1895	2.18	2755.57	53.4474	–	85	432.693	274.473	294.916	291.972	643.989	255.737	1148.98	314.785	556.405	596.446	873.915	855.724	604.208	628.559	604.381	412.652	376.966	439.34	243.505	333.677	398.019	466.62	463.391	187.098	929.687	200.328	1333.86	310.728	1326.85	558.049	760.257	546.963	481.399	376.286	555.287	845.714	952.228	603.892	811.634
252	Unknown	–	–	–	1900	2.06	2764.44	4.67852	–	31	33.3642	26.9849	12.2728	18.1051	21.3327	7.3564	19.6729	11.4012	–	–	1.96518	27.183	15.7523	17.833	19.5021	35.6407	19.4582	22.2176	11.3852	2.04125	8.41783	3.92881	14.9432	10.688	29.6931	2.09137	31.6673	4.87292	83.3613	64.9501	15.9013	9.90974	18.5214	2.52295	23.654	9.67709	–	16.3746	2.69062
253	Unknown	–	–	–	1905	1.8	2773.05	15.3933	–	201	56.2974	55.7075	82.179	78.9647	9.85363	11.8738	45.3163	75.0359	21.3273	24.0601	17.9468	30.1949	136.548	116.674	162.43	74.5325	102.611	103.52	–	19.6066	191.919	87.4751	96.3606	29.2003	15.5808	27.3293	91.9375	61.1772	182.067	96.3553	114.502	89.519	56.6114	37.6041	96.179	51.7485	31.1663	47.9352	–
254	Unknown	–	–	–	1905	2.14	2773.67	6.19748	–	151	76.7611	7.76181	11.9075	11.8212	–	3.73453	21.5309	23.4797	2.97272	13.2149	30.8263	2.58283	24.8672	117.91	45.2921	21.0825	17.2402	16.6951	2.34864	9.01264	12.4187	3.62098	10.3109	9.68552	20.0217	5.95609	30.4731	7.5611	22.853	19.5156	9.79086	8.5682	11.1996	2.00998	22.6973	18.9466	–	11.8729	34.6953
255	Unknown	–	–	–	1915	1.74	2791.11	14.298	–	68	304.13	142.503	278.499	343.933	149.197	180.117	437.49	156.576	165.126	240.403	301.248	247.497	279.744	392.552	449.385	185.797	365.1	276.336	75.8858	187.76	234.762	91.3194	185.047	68.8337	292.182	452.707	139.902	67.0067	1033.02	355.607	461.752	1400.04	353.325	213.251	620.245	295.522	345.4	1055.81	603.886
256	Unknown	amide	–	–	1915	2.26	2792.06	45.4704	–	99	255.141	101.052	102.631	138.176	211.993	100.963	470.848	114.682	163.762	259.149	318.161	373.941	233.154	210.725	239.564	159.065	150.237	94.9787	52.7685	106.902	124.519	182.85	123.13	101.427	342.025	94.4744	688.352	107.361	616.931	234.411	253.43	260.055	197.498	101.796	197.762	457.878	359.718	252.25	366.056
257	Unknown	–	–	–	1920	2.18	2801.1	9.18899	–	43	3010.75	654.202	522.542	568.356	355.329	190.601	1283.95	613.751	422.533	607.436	379.689	946.257	914.875	1721.48	1276.4	597.946	720.177	462.313	147.298	305.083	1368.46	889.086	681.205	1258.34	2670.65	866.338	2864.86	563.655	3358.6	649.792	719.114	2171.03	2581.98	623.528	1208.2	704.223	551.402	1250.82	846.808
258	Unknown	–	–	–	1925	1.78	2810.29	13.8969	–	82	385.454	201.471	422.21	430.168	227.607	288.733	755.397	357.018	241.331	396.65	401.29	406.537	545.469	508.726	660.281	262.664	723.335	427.949	133.264	224.879	650.921	252.278	316.591	144.75	413.775	569.679	396.9	169.113	1307.57	464.229	745.756	2353.31	487.236	343.933	1045.97	464.718	694.748	1716.94	1647.65
259	Squalene	terpene	–	111-02-4	1935	1.94	2830.6	51.5689	410	67	72844.7	67924.2	110417	84519.1	14590.5	9527.76	103422	99758.8	32890.5	43254.3	68410.7	69616.9	100938	140995	102984	50863.6	100870	123326	13958	27050.5	124918	98401.7	46660.4	30060.7	39128.9	25601.7	66339.4	76286.4	91771.8	88914.6	79034.9	71539.4	79647.3	69258	76447.7	86315.1	57277.5	96837.8	63420.6
260	Unknown	–	–	–	1940	2.59	2841.89	19.614	–	94	663.981	346.697	1132.79	801.405	26.1681	20.2599	493.794	699.584	52.0856	49.6651	137.485	156.274	1123.12	848.504	987.816	270.616	703.981	840.496	210.625	234.909	1436.59	628.743	159.251	64.6234	89.9488	38.253	356.628	354.715	748.438	473.3	370.99	326.069	227.943	260.929	478.147	382.327	215.416	256.212	145.777
261	Unknown	–	–	–	1950	2.22	2861.14	26.425	–	85	207.064	114.287	185.416	155.929	135.812	79.6347	363.188	129.196	141.765	135.832	206.8	232.43	347.621	424.435	313.868	133.102	192.411	237.196	93.5984	121.79	237.094	147.552	130.731	44.1317	308.888	73.0912	319.894	116.564	235.696	177.903	202.152	255.735	159.021	105.268	277.946	221.529	180.865	188.091	157.324
262	Unknown	–	–	–	1965	2.61	2891.9	8.63676	–	131	314.206	79.3493	193.666	159.806	0.239743	1.91284	–	1.61987	12.7767	3.69328	6.2495	0.13218	261.865	234.092	247.458	104.848	155.055	242.643	116.248	167.995	7.96984	8.28676	20.1883	8.92282	11.5037	–	9.35396	3.45531	48.0692	7.77778	15.3105	3.92216	15.5105	1.80173	–	0.104458	–	–	8.63296
263	Nonacosane	hydrocarbon	–	630-03-5	1970	1.67	2900.02	2.86581	408	195	23.8137	24.7953	23.436	28.5702	32.4245	26.2475	34.8261	27.2628	17.5456	28.8297	42.4473	28.8452	40.7166	31.8177	45.4252	33.8017	35.1825	38.6753	24.1191	25.3034	30.7658	–	22.4402	4.28499	56.9776	55.0645	23.8583	13.7682	166.145	34.6281	61.0346	118.073	58.3619	25.7733	92.9734	33.4418	58.1244	138.268	160.186
264	Unknown	sterol	105, 143	–	1975	2.37	2911.41	8.39879	386	366	48.5788	32.4378	41.2455	27.5784	19.7858	24.9987	37.446	41.7749	50.662	59.6494	28.1754	39.5276	47.0353	40.4214	44.635	31.1244	59.7004	64.9843	11.5159	28.0579	162.232	60.8749	64.6434	37.4189	54.4657	27.495	66.2635	40.7733	186.1	75.4212	57.9647	51.9652	74.7578	74.9993	42.9115	24.631	10.9235	71.8031	13.5163
265	Unknown	–	–	–	1980	2.08	2920.83	11.6724	–	84	62.3307	64.2009	78.5675	54.7711	47.5977	21.3145	109.781	55.147	25.5516	67.5403	61.9876	62.4214	182.135	112.59	149.168	72.2761	148.549	141.864	35.8006	40.3446	76.6465	75.4145	52.9973	53.5482	364.382	69.6507	287.415	106.555	2012.13	593.384	91.318	261.645	97.2994	45.5396	145.264	103.909	133.461	109.029	139.75
266	Unknown	–	–	–	1985	1.88	2930.42	50.4654	–	58	756.852	507.537	989.909	622.379	601.456	201.749	1270.48	285.723	681.443	611.371	795.71	402.71	884.729	781.322	932.597	439.911	683.721	1379.56	730.922	802.108	569.904	489.1	1064.41	295.959	1007.17	255.148	657.17	307.325	1444.64	666.478	794.139	943.303	867.167	452.855	833.255	493.793	183.628	348.817	314.405
267	Unknown	–	–	–	1990	2.34	2941.34	5.1166	–	246	122.901	12.5833	23.515	4.79397	11.4032	6.65558	41.0945	8.38656	18.3415	18.2422	13.3092	26.6793	11.489	58.8975	32.3262	14.2721	15.1847	22.817	9.51763	10.9556	26.0439	9.07518	24.0302	31.4411	98.8902	–	87.6713	15.5116	79.8623	4.53493	9.95143	7.78443	44.9261	26.1686	19.7104	15.4098	19.1546	24.2506	3.88312
268	Unknown	–	–	–	1990	2.68	2942.01	4.49353	–	80	280.803	77.7372	246.09	177.229	–	–	16.5161	2.20692	–	–	6.21978	11.7179	342.686	204.272	333.465	110.061	165.893	313.623	108.299	172.572	0.837658	1.29142	–	–	11.5409	0.194943	10.3021	4.11666	12.9073	13.6241	2.73165	9.97538	2.7678	–	11.1297	3.98004	8	16.2601	–
269	Unknown	wax ester	166, 208	–	2000	1.9	2960.44	14.0253	–	167	72.6514	79.8283	129.829	113.148	30.8124	7.26813	95.6075	140.542	24.2588	30.0991	86.34	42.4664	118.671	101.605	91.02	48.3925	83.041	69.3094	18.1138	21.0233	314.823	129.142	90.0344	32.0543	49.5323	4.39787	157.05	88.1923	342.169	108.33	148.065	104.154	38.7039	37.8383	89.0747	31.5855	61.3859	71.2548	33.1643
270	Unknown	–	–	–	2000	2.08	2960.8	15.0695	–	125	55.3526	61.3606	110.669	93.0546	5.41827	5.33999	38.7332	51.5695	19.2	32.2313	23.8217	27.6926	115.423	98.0885	116.311	39.6248	132.698	120.727	13.0951	47.4975	257.381	83.5307	43.6201	24.1337	44.6316	26.0645	81.3287	55.191	274.041	70.5176	52.5037	56.3739	40.0297	40.6429	106.222	44.8603	53.2209	71.479	37.3513
271	Unknown	sterol	67, 79, 91, 133, 201, 334	–	2000	2.82	2962.28	6.42819	–	201	271.994	60.0253	217.362	142.804	7.22821	3.31404	4.74917	6.69395	4.89621	4.95276	7.11444	–	289.987	228.919	237.52	94.3892	170.362	209.671	111.456	169.526	–	–	–	–	23.5706	12.3513	9.70326	4.97915	5.76381	4.77068	5.96208	–	–	–	–	–	7.7128	7.9521	5.87314
272	Unknown	–	–	–	2010	1.84	2980.31	10.5753	–	201	95.3087	74.2023	87.6999	51.884	5.7179	23.0956	79.477	77.9501	27.1484	22.8598	27.3613	12.6806	79.5498	79.3202	173.551	56.7729	181.411	100.508	6.97671	49.507	140.132	54.5536	123.917	63.0291	36.0756	12.0719	107.162	48.6853	395.773	139.466	185.071	101.079	132.303	66.4052	271.97	73.4065	31.1464	40.9419	8.09514
273	Unknown	sterol	67, 79, 91, 133, 201, 334	–	2015	2.85	2992.32	7.17001	–	200	198.609	50.8794	146.419	146.325	4.88401	–	17.9834	21.6946	–	3.62608	13.0255	14.4524	219.037	185.783	226.266	78.688	146.968	184.289	80.7764	105.287	0.508538	–	7.53493	8.69705	12.9022	2.11399	–	–	7.44777	13.5114	1.30583	2.34331	–	7.29785	14.1444	–	9.97494	12.9182	3.38456
274	Unknown	–	–	–	2025	1.84	3010.29	21.9134	–	131	563.158	403.317	1067.45	737.999	181.833	46.3582	1187.5	171.751	361.4	531.13	455.804	513.799	786.663	300.147	1597.54	312.896	2615.99	2653.96	520.663	422.576	567.951	188.735	1170.88	273.848	3554.5	148.482	1796.29	304.56	1776.93	1158.2	640.158	739.171	1965.14	426.576	875.389	835.254	407.91	444.079	182.757
275	Unknown	–	–	–	2025	2.23	3011.07	6.22966	–	131	26.265	20.9616	30.4065	27.3014	31.6021	6.03792	45.2901	25.018	24.0945	11.3571	18.8417	10.3812	43.6682	67.6593	46.2462	7.15658	53.0441	39.5329	24.0326	24.0246	66.6591	8.69993	39.4935	6.0071	21.8556	7.20004	31.8694	37.0712	66.8483	45.2169	26.0306	14.8483	27.8864	15.0397	27.2329	27.1169	31.0931	23.6015	9.74318
276	Unknown	–	–	–	2030	2.13	3020.86	12.8609	–	84	199.141	176.122	296.794	288.426	86.8876	42.5571	272.936	243.049	111.452	142.743	138.82	158.506	458.729	390.148	614.536	227.334	475.097	368.055	64.6704	105.734	571.842	275.299	203.249	88.5822	210.48	155.128	435.329	215.432	1301.56	462.491	371.168	714.056	188.502	151.715	467.382	196.668	243.167	353.907	391.141
277	Unknown	–	–	–	2040	2.3	3041.19	9.89131	–	125	63.9186	51.8876	62.2648	58.3806	9.09936	6.89355	25.9013	58.8809	14.1062	20.7911	37.831	28.3633	97.5709	71.6447	103.259	44.9907	139.143	156.17	5.80572	14.3307	162.074	63.5276	29.7605	11.8011	21.1178	26.5318	80.507	56.1521	128.943	58.9767	38.6267	28.2921	22.3387	39.7159	60.0951	40.4955	33.9415	54.9372	14.5775
278	Unknown	wax ester	180, 222	–	2045	1.89	3050.36	19.0488	–	197	14.1269	26.7232	47.0778	31.7299	14.3114	15.9182	11.7057	31.2981	15.0279	6.75715	17.0632	10.678	35.7558	18.8037	27.2249	21.0197	31.2548	37.1497	5.59015	7.64338	70.163	39.2777	2.16988	9.50366	23.0397	0.76935	33.2814	21.9341	32.2874	11.3027	28.4076	31.7698	12.0459	12.9818	28.1377	12.8709	14.13	0.254158	19.2861
279	Unknown	wax ester	152, 236	–	2045	1.94	3050.46	37.8351	–	66	124.695	107.368	302.226	272.212	268.631	109.697	258.11	158.632	363.269	290.686	404.529	143.705	274.121	144.285	161.889	47.5895	171.772	180.275	108.873	96.9184	428.092	171.006	335.816	15.8417	43.2635	65.2892	114.007	88.8303	354.492	159.738	414.027	265.074	143.7	186.57	263.405	124.522	79.666	158.89	62.3094
280	Unknown	–	–	–	2045	2.39	3051.36	18.8753	–	109	104.845	30.185	49.0625	50.8017	27.7498	15.7026	48.845	48.3613	18.8822	19.4427	31.6414	24.7192	103.142	129.817	81.1929	43.4438	86.6394	82.5063	11.1417	42.1071	49.7179	48.0534	36.3194	31.2067	47.3526	14.1963	58.3939	32.1836	107.721	63.7638	60.731	36.5048	32.2142	35.8545	60.2701	49.8984	52.1251	73.5096	29.5768
281	Unknown	–	–	–	2050	2.03	3060.63	8.26098	–	108	56.7944	56.0339	31.165	51.3633	14.5223	–	22.7977	17.7725	14.9454	23.0426	16.6613	14.5077	103.353	100.047	324.849	140.253	42.2715	46.4935	11.6374	26.1745	23.8975	21.7605	75.976	10.1983	26.5802	2.70947	65.9774	43.4251	114.12	28.4531	38.2289	47.809	31.3278	12.7081	130.589	70.9528	101.411	122.174	54.6281
282	Cholesta-4,6-dien-3-ol, (3beta)-	sterol	–	14214-69-8	2075	2.47	3111.46	37.0934	394	141	389.651	154.101	238.683	226.709	224.156	74.5948	550.272	58.6015	212.156	199.292	237.283	135.909	283.608	393.652	345.756	350.824	237.215	263.251	152.032	353.008	270.887	136.002	454.881	160.623	441.572	94.0293	571.108	139.125	595.968	236.112	286.979	284.915	353.486	177.106	466.027	150.531	201.522	513.204	191.709
283	Unknown	–	–	–	2080	1.98	3120.46	81.3368	–	59	1661.65	1197.41	1732.24	1153.54	1402.35	586.524	2363.65	769.945	1826.77	1688.86	2036.65	1071.86	1608.78	1483.61	1611.76	821.865	957.647	2733.8	1062	1551.63	1331.95	1326.63	2112.24	724.397	2812.07	573.158	1364.79	882.587	2792.9	1563.48	1934.33	1862.23	2457.99	1224.52	1587.45	1176.63	232.227	446.517	189.266
284	Unknown	–	–	–	2080	2.27	3121.04	20.437	–	109	78.8164	48.6627	72.2362	68.322	22.2309	18.1623	76.8749	41.151	32.5862	32.7665	43.4052	57.642	184.894	179.683	116.31	61.183	105.966	113.392	37.3227	50.501	93.9827	62.308	80.7059	25.6214	100.914	21.8295	147.937	33.4751	258.446	92.4012	83.66	74.4285	60.7745	24.2389	92.843	62.2369	66.3287	83.4983	54.0481
285	Hexacosanamide	amide	–	–	2080	2.33	3121.16	9.02522	395	69	442.512	180.831	244.502	239.104	47.4165	27.3174	313.635	236.021	106.295	136.81	144.202	217.163	422.991	425.056	428.637	200.79	398.786	394.957	70.9548	108.587	538.815	167.244	211.474	156.375	720.779	123.73	737.267	134.19	1118.98	289.753	153.824	399.14	267.109	111.752	433.719	187.055	262.876	270.55	208.564
286	Unknown	–	–	–	2080	2.59	3121.68	5.03455	–	84	368.121	164.1	23.5283	10.5533	0.273453	–	33.5915	36.9428	5.39721	15.7534	2.3147	19.1936	23.0774	27.7252	89.5017	37.9454	16.9933	8.94877	–	12.0506	39.6735	12.5327	27.9215	15.8687	455.776	7.43557	60.9681	17.2049	117.375	90.5303	3.98603	54.3819	25.9188	7.06698	14.33	15.7257	1.75471	22.2	9.06543
287	Unknown	wax ester	152, 194, 236	–	2090	2.01	3140.49	25.1757	–	40	474.413	399.025	633.628	497.221	99.5482	43.5981	512.041	735.711	108.379	98.4176	362.304	265.608	686.966	259.018	570.582	181.353	548.091	500.781	39.7569	76.8374	1671.34	714.774	274.411	180.795	197.343	76.3613	489.114	353.663	683.182	301.956	482.132	391.396	215.64	122.096	342.89	192.778	198.02	373.073	82.7971
288	–	–	–	–	2090	2.23	3140.93	25.288	–	83	143.943	107.02	183.201	156.51	113.017	42.2315	280.396	205.349	82.7013	112.686	165.585	254.495	340.814	247.105	278.498	130.482	291.092	214.861	70.9847	52.1164	425.99	190.965	156.482	88.7412	236.737	78.4558	484.33	129.418	697.473	248.528	228.355	256.683	134.974	100.185	240.21	228.753	333.691	170.368	208.664
289	α-Tocopherol	–	–	59-02-9	2095	2.48	3151.41	7.34975	430	164	84.6161	53.143	63.4841	35.3719	10.0534	7.13041	122.723	168.142	16.668	51.9463	16.1257	35.8969	87.3132	42.7186	73.6041	23.0554	320.764	131.471	17.7177	23.0909	328.9	96.9095	29.7964	47.0126	180.731	29.2036	232.044	102.076	259.595	84.35	69.2003	56.7179	131.991	44.2983	82.7112	44.5498	80.3886	65.7294	1.19982
290	Cholesterol	sterol	–	57-88-5	2100	2.74	3161.91	37.3647	386	40	1842.85	1517.4	1166.41	854.811	106.576	115.418	1787.33	2181.24	610.315	973.693	385.42	651.464	2118.07	2597.63	1657.41	264.466	1931.08	3849.69	375.85	1151.04	3302.85	2485.37	1142.98	1095.09	1996.34	567.093	1474.24	1322.52	1823.92	1241.58	1027.45	1103.4	2100.37	1061.84	1086.94	686.788	1522.71	1528.97	119.265
291	Unknown	–	–	–	2100	3.1	3162.63	15.2916	–	159	119.989	135.024	55.7359	50.4105	7.68042	8.68263	71.8048	207.617	6.58283	55.5422	11.6798	36.3167	132.41	99.2768	100.118	34.4591	156.026	217.493	22.5296	44.1657	347.152	201.282	46.8902	76.5343	91.831	35.1792	68.0912	82.6773	136.132	100.302	56.0699	68.6341	100.494	37.3333	53.8816	43.8377	81.1949	89.5569	10.7514
292	Octadecyl dodecanoate	wax ester	201, 452	3234-84-2	2105	1.98	3170.37	17.6461	452	228	77.6055	68.4917	113.894	101.175	22.2967	10.0366	82.0905	152.434	17.0386	9.0845	44.644	43.312	117.729	101.352	120.932	37.9962	133.812	111.576	11.7465	29.3415	218.271	117.018	138.515	61.7645	46.2193	36.6248	90.348	73.1626	126.514	153.992	156.968	112.087	43.0938	36.6341	221.13	78.4265	41.2	45.7631	9.07784
293	Unknown	–	–	–	2120	2	3200.36	21.973	–	105	219.372	156.149	391.915	232.234	53.3972	12.5411	363.975	67.9461	101.09	154.836	128.668	180.981	267.723	140.498	603.378	123.187	756.138	917.499	195.043	128.048	204.977	69.957	338.502	86.4748	1123.96	49.7858	650.924	92.1799	421.624	352.853	145.009	123.937	719.315	145.528	251.454	280.178	150.313	158.898	123.157
294	Unknown	wax ester	180, 222	–	2125	2.09	3210.5	10.1682	–	67	761.247	655.888	1307.39	1210.1	165.517	70.8204	869.355	1187.52	201.995	241.965	584.134	457.357	1088.61	807.322	1007.59	449.65	869.631	1165.39	214.2	342.729	1506.72	735.01	551.448	272.464	471.687	226.589	934.979	462.83	2890.42	655.442	660.287	723.94	358.033	168.073	797.322	372.08	487.486	811.45	433.861
295	Unknown	–	–	–	2125	2.41	3211.14	7.23536	–	83	75.9022	39.5083	78.825	75.9528	27.8124	11.9938	69.3426	80.9348	18.886	44.4079	63.7838	69.684	171.963	129.127	138.668	46.7864	140.016	115.868	23.4706	36.5496	111.468	48.4562	37.3387	26.2118	47.662	57.0508	140.086	47.7046	3303.81	331.233	57.9213	237.975	50.4837	11.0772	150.995	57.9747	63.8059	131.55	174.081
296	Unknown	wax ester	166, 208	–	2130	2.14	3220.56	12.8016	–	59	113.578	75.6055	159.685	119.083	74.342	38.6707	178.197	77.0399	104.444	108.768	107.542	73.2275	136.043	118.934	177.57	78.475	124.667	196.686	61.9261	78.2741	179.212	105.911	144.945	77.0838	146.876	37.8716	120.538	59.7851	2120.01	120.955	97.2196	135.9	124.508	44.5946	119.277	73.0432	32.9632	71.2209	24.0073
297	Lathosterol	sterol	–	80-99-9	2130	2.99	3222.25	18.694	386	43	659.554	1196.25	959.405	1152.27	227.128	188.985	626.204	1604.39	555.038	948.161	405.085	949.015	1242.86	1326.1	1290.77	657.053	3087.64	4201.19	109.799	580.999	3484.23	1823.26	520.951	732.021	2180.36	951.083	4325.46	2527.4	4164.46	998.645	1538.1	2003.32	1662.21	1336.91	1446.26	974.488	437.436	635.229	674.927
298	Heptacosanamide	amide	–	1035424-52-2	2135	2.57	3231.37	4.99062	409	59	1687.91	346.85	298.064	118.937	51.7172	41.3012	390.718	243.017	79.016	100.89	69.4172	254.909	140.469	290.057	1036.58	600.07	256.964	117.601	133.997	61.2178	360.78	188.661	126.303	547.982	1245.06	140.507	697.832	216.812	509.872	106.573	53.0614	112.297	763.658	18.8838	83.6467	232.837	149.019	171.274	163.582
299	Unknown	wax ester	152, 236	–	2145	2.2	3250.56	24.215	–	44	411.764	463.297	828.074	784.583	480.144	284.727	891.267	714.097	659.676	717.303	836.154	396.13	1003.57	283.691	559.381	241.993	859.411	615.595	323.713	322.546	1655.49	687.322	735.611	113.665	87.7696	130.405	480.571	294.573	1241.66	522.435	812.929	733.202	412.558	589.174	649.317	333.136	202.119	554.037	155.151
300	Cholesta-3,5-dien-7-one	sterol	–	567-72-6	2145	3.29	3252.73	13.0506	382	161	80.0659	52.4737	61.3786	54.0812	33.079	10.552	61.2876	40.2468	22.7924	32.4185	35.69	56.2908	88.9448	44.6833	86.9062	26.1929	243.367	90.5269	32.7607	30.6261	204.967	85.9215	86.9102	81.9787	34.3001	8.1497	97.2848	80.4245	256.18	119.555	22.0466	56.1071	44.6401	34.5542	33.3626	45.6041	15.652	38.6534	20.525
301	Campesterol	sterol	–	474-62-4	2155	3.12	3272.31	36.9735	400	95	659.935	608.332	628.578	496.272	58.8904	66.7926	457.435	104.261	155.134	277.74	178.244	123.027	647.951	797.717	734.218	361.528	413.599	1363.71	234.236	773.651	235.122	194.934	146.794	141.381	342.578	103.367	223.057	166.694	368.572	239.935	209.634	247.371	356.882	168.979	257.709	224.996	162.527	402.117	188.142
302	Cholest-4-en-3-one	sterol	–	601-57-0	2165	3.42	3292.83	21.4127	384	145	75.6301	51.3575	69.8922	50.369	100.931	42.8064	96.1257	82.857	82.7512	68.5272	53.3626	45.3342	56.0672	55.9765	34.088	24.6128	61.5429	44.1444	25.0605	42.1144	459.935	344.851	80.3387	67.1417	30.6048	23.0173	61.58	29.2588	125.894	33.6334	79.9049	29.6128	68.6307	55.8084	39.7572	20.855	10.8949	232.294	6.91661
303	Tritriacontane	hydrocarbon	–	630-05-7	2170	2.04	3300.03	10.3233	464	100	98.1834	29.6988	30.2003	143.328	83.3597	59.0035	116.52	43.0395	59.9747	81.7252	90.6108	105.591	27.1524	39.658	53.8286	33.3269	95.1018	36.4291	16.5272	29.9907	107.778	16.2701	31.4569	11.8935	93.9434	367.372	29.7634	20.6414	467.366	66.8789	114.613	858.216	87.7006	54.9607	249.317	101.001	74.5378	499.369	357.329
304	Unknown	sterol	–	–	2170	3.2	3301.96	40.9675	–	119	171.144	153.136	150.499	117.114	46.2515	25.5902	182.631	77.2016	77.4238	107.719	83.0778	84.2229	178.073	196.595	179.304	108.524	201.216	453.081	96.8556	205.37	175.035	109.846	115.056	69.3792	184.432	47.857	107.798	59.1397	258.01	73.2446	119.276	86.8179	168.763	86.1164	153.261	75.7345	146.316	144.882	113.1
305	Unknown	wax ester	152, 236	–	2180	2.36	3317.17	34.4063	–	31	433.12	637.697	339.578	427.054	27.2479	45.7026	314.38	190.419	89.8856	400.616	132.215	252.369	256.387	466.661	461.241	394.88	271.434	1329.53	217.459	561.054	157	168.969	76.3158	131.787	587.331	98.163	263.095	228.343	761.787	460.341	150.516	410.088	520.944	197.992	161.602	298.242	27.8922	51.6494	28.7496
306	Unknown	wax ester	185, 229, 480	–	2185	2.41	3325.56	84.0919	–	59	1026.34	779.275	1274.98	900	803.221	404.306	1524.52	500.869	934.568	1028.66	1004.08	546.049	995.257	834.813	1277.18	576.083	796.075	1699.56	756.391	977.937	879.815	748.902	574.665	336.685	1113.45	321.053	726.906	476.212	1206.04	567.118	832.015	934.468	1245.22	466.055	510.085	554.666	85.8645	295.124	115.148
307	Cholesta-4,6-dien-3-one	sterol	–	566-93-8	2185	3.69	3327.69	27.6676	382	43	480.971	404.871	425.861	433.422	440.622	279.017	637.751	639.098	920.75	932.134	636.762	425.761	725.943	262.411	385.117	115.982	571.483	302.356	175.579	200.178	2277.6	1204.88	514.027	233.581	287.56	293.118	334.566	421.914	1425.05	471.022	785.151	745.745	910.196	862.807	332.734	311.136	309.772	1553.25	329.56
308	Unknown	–	–	–	2190	2.31	3333.7	9.90692	–	224	50.0013	52.9687	33.177	31.4917	–	8.30827	18.4258	1.0519	9.83433	–	13.4575	12.3389	12.7991	–	36.9228	11.1158	31.9871	27.5664	3.96806	17.2391	28.4127	8.67798	25.9734	22.8077	11.9042	–	23.6168	18.7977	121.672	60.2375	25.3021	26.5642	15.0974	12.3928	41.358	21.02	21.8856	19.1065	19.6494
309	Unknown	wax ester	152, 194, 236	–	2200	2.48	3350.59	18.8428	–	82	3123.33	2437.49	3528.01	2412.26	467.007	228.496	3412.1	5482.7	508.826	537.981	1438.1	1328.17	3828.89	1884.96	3886.84	1131.03	6097.2	3958.75	325.864	430.628	9290.99	3521.83	1754.32	1056.62	885.595	563.337	2356.72	1742.5	4778.64	1296.92	2523.01	1818.82	1403.71	857.19	2103.09	1182.55	1344.27	1746.25	593.697
310	Beta-Sitosterol	sterol	–	83-46-5	2210	3.49	3368.88	68.4597	414	233	210.348	151.548	230.064	140.253	43.7991	56.5715	192.593	69.8244	71.356	122.384	85.7711	116.633	277.432	315.307	253.846	151.265	202.572	454.786	84.5908	263.615	151.055	95.611	47.2841	90.0619	100.286	58.3659	100.482	132.289	158.14	77.1351	108.976	147.069	214.43	80.6274	147.544	157.713	164.319	177.709	107.316
311	Unknown	sterol	189, 205, 218	–	2220	4.02	3386.36	42.6299	–	218	360.39	216.226	349.785	188.037	109.531	40.9015	249.726	34.509	105.289	111.816	126.944	43.0106	316.673	320.005	332.873	106.311	245.548	494.276	144.26	313.076	74.0619	59.7319	68.6292	32.5782	133.884	41.6868	53.5709	58.7558	125.394	95.3925	112.649	107.472	138.305	48.5662	115.768	77.3906	167.496	185.084	145.84
312	Tetratriacontane	hydrocarbon	–	14167-59-0	2225	2.25	3391.73	63.5895	478	113	644.016	261.182	105.911	637.211	260.723	248.37	394.777	231.855	192.584	322.648	336.273	494.049	112.727	154.9	230.494	84.2249	423.601	77.6673	35.7891	63.8629	473.822	25.5808	92.8716	48.0592	178.613	1289.29	53.6434	50.7325	1003.8	212.259	291.45	2338.37	370.16	178.514	548.114	377.078	267.897	1977.53	1372.74
313	Unknown	sterol	–	–	2230	3.64	3402.34	66.1594	–	95	885.517	655.435	880.072	687.259	252.463	157.014	749.076	240.293	393.733	574.309	435.255	358.505	826.329	913.871	782.519	426.075	561.397	1619.69	506.978	889.052	487.063	515.53	651.866	314.981	839.765	183.805	450.77	350.378	710.606	476.844	541.035	471.222	720.01	347.689	547.37	391.983	329.614	589.378	430.986
314	beta-Amyrin	sterol	–	559-70-6	2240	4.11	3419.72	41.5308	426	189	184.5	137.051	181.832	143.81	17.0286	28.4631	153.1	32.9222	72.4019	85.8363	62.3054	61.0173	166.683	231.5	182.397	100.705	112.991	340.734	93.7126	227.718	49.9268	49.1357	42.3659	39.7512	129.058	32.0253	51.6075	47.1029	103.373	59.8527	68.3839	88.3992	110.148	61.8882	83.519	73.6727	107.937	126.15	86.5682
315	Unknown	wax ester	152, 194, 236	–	2245	2.66	3425.61	13.784	–	140	45.9055	51.0275	120.906	112.523	21.4875	5.58993	111.246	185.337	15.0452	4.98226	37.9428	33.2548	114.211	81.2601	101.333	42.8676	171.505	147.669	19.0007	–	261.326	132.748	34.8989	27.6926	28.1584	10.2888	63.9568	80.2828	189.764	57.4165	58.2635	37.8363	46.9561	31.3945	59.1945	36.8496	42.3553	46.7545	8.41384
316	alpha-Amyrone	sterol	–	–	2250	4.39	3436.78	39.7173	424	134	454.611	292.564	458.491	251.416	128.032	64.1595	306.407	69.0499	152.11	171.718	134.354	75.5669	369.985	343.062	388.018	164.967	325.655	637.658	177.516	415.517	91.6999	98.6325	65.5888	39.2422	174.942	44.4963	39.8609	66.8723	149.406	64.2362	105.5	125.417	212.363	58.4032	104.559	114.534	175.261	191.436	159.776
317	Unknown	wax ester	180, 222	–	2265	2.37	3458.32	6.34899	–	83	71.6627	47.8629	60.5396	121.715	62.2448	49.2808	108.232	50.7325	63.8263	76.1317	89.2754	86.2908	178.47	214.252	277.548	208.82	86.202	83.9188	13.9408	47.7132	72.2735	11.0324	75.507	4.53826	120.279	208.136	87.0359	33.7931	296.912	79.1264	109.489	672.683	96.8071	63.9242	190.657	63.0978	108.605	347.459	402.026
318	Stigmasta-3,5-dien-7-one	sterol	–	2034-72-2	2265	4.26	3461.46	95.677	410	161	605.763	303.886	564.312	336.277	267.766	210.354	628.546	124.053	228.17	226.286	285.864	290.766	510.587	397.811	519.092	227.281	424.764	487.934	302.415	374.884	281.04	267.746	151.993	101.661	296.136	108.303	171.112	89.4597	244.947	141.384	207.116	188.284	366.971	101.603	181.13	148.525	273.641	395.724	459.42
319	Unknown	–	–	–	2270	2.67	3467.12	11.9646	–	256	72.7518	61.4498	124.741	120.489	25.5793	20.562	96.2389	193.306	27.8334	37.7053	32.3892	52.22	137.077	102.616	150.589	69.1524	162.022	112.071	14.6294	20.4666	449.057	205.715	57.373	21.8071	33.672	13.0464	85.3506	67.4263	138.818	44.4622	70.006	65.0033	70.0109	45.4362	52.9534	31.9341	49.646	63.1672	23.6259
320	Unknown	sterol	189, 203, 218	–	2275	4.5	3478.46	53.1574	–	133	286.505	227.9	294.872	206.66	59.2868	45.7605	220.435	49.9678	119.703	155.071	103.615	81.1317	276.838	368.732	320.404	166.804	198.55	595.063	143.307	398.086	104.979	99.2009	106.419	97.0273	282.886	34.4025	83.5192	83.7299	186.428	120.611	152.307	145.709	224.128	124.346	127.988	122.255	152.556	191.707	185.669
321	Pentatriacontane	hydrocarbon	–	630-07-9	2290	2.5	3500.02	165.267	492	141	205.808	95.3014	34.4271	167.448	68.1351	94.0193	104.572	56.2568	36.67	96.1309	48.656	77.5509	18.1972	20.8343	71.7412	33.7977	34.0798	17.2854	19.2207	24.5223	113.741	17.9319	5.15835	28.5915	27.3886	188.365	10.8328	16.3686	161.839	46.8589	45.5409	371.691	85.1916	32.9807	117.124	69.2229	106.257	374.012	365.477
322	Unknown	wax ester	152, 194, 236	–	2305	2.96	3519.28	16.6796	–	126	166.992	105.661	147.48	127.808	22.5522	–	18.4385	78.3453	12.7241	8.501	35.352	29.4019	41.7607	19.0373	109.71	36.4538	42.7769	51.6531	5.69417	21.998	97.8942	47.6853	15.4094	37.6294	14.835	16.6853	53.155	35.5693	190.524	61.9647	33.4531	43.2269	20.3167	8.82324	35.346	12.1209	53.4491	40.5602	29.7053
323	Unknown	wax ester	229, 257	–	2320	2.89	3537.87	12.2388	–	257	325.225	284.47	103.385	77.8379	15.2196	4.86627	69.4764	96.9667	9.88512	23.3143	12.8512	31.984	37.5915	26.5422	264.009	96.3253	54.4158	78.3207	23.6305	13.1734	96.7372	35.489	28.0665	16.0783	17.7567	28.1317	36.4731	44.8363	237.705	94.1178	30.6605	17.8663	11.3029	18.3407	40.6456	25.6727	40.688	30.8283	19.0226
324	Unknown	–	–	–	2345	2.64	3568.68	5.12841	–	71	66.6261	35.1898	51.493	198.614	121.341	64.4203	163.735	53.6999	100.975	86.0998	140.691	178.43	139.601	182.259	446.166	309.633	78.1011	72.0067	31.3431	54.5347	98.3779	10.3533	51.7685	11.1018	151.926	619.345	18.2914	–	228.94	78.7878	131.625	1548.18	131.709	89.1005	236.79	137.846	198.301	737.717	974.615
325	Unknown	wax ester	257	–	2345	3.1	3569.26	27.0886	–	58	1537.44	1292.36	576.061	475.44	93.3176	28.1896	865.84	1130.66	129.915	99.6307	221.811	210.051	674.18	403.957	1477.68	551.039	862.106	795.756	50.159	96.7909	1465.12	571.115	353.436	212.196	195.541	132.619	331.059	349.989	745.584	354.954	388.329	326.568	264.338	206.033	367.725	283.883	298.637	290.757	118.299
326	Hexatriacontane	hydrocarbon	–	630-06-8	2370	2.81	3600.02	451.388	507	141	247.615	101.335	5.41051	68.5762	43.7951	50.7851	63.7498	36.3879	22.8931	39.8244	37.5003	72.5329	7.6008	12.5678	27.5442	21.7155	16.2069	3.37547	–	16.1721	50.2182	8.94456	6.8798	2.26569	29.004	195.848	22.3287	–	50.8388	36.0446	28.5622	336.636	57.0825	22.0277	52.9587	41.5329	45.4291	244.018	184.253
327	Unknown	–	236	–	2405	3.39	3637.34	17.8391	–	93	50.9075	33.717	87.0639	79.7658	25.3083	11.4731	148.023	115.398	32.6611	30.1198	41.9596	57.0838	126.475	119.725	130.704	63.9494	201.023	198.665	22.8184	15.1572	192.251	54.523	59.6713	22.2335	39.1353	25.664	130.726	54.0785	313.51	86.5808	91.4571	64.2768	50.1364	46.99	151.478	40.6008	60.9933	70.6427	55.0013
328	Unknown	–	–	–	2410	4.04	3643.26	15.1771	–	81	172.889	152.097	241.884	187.322	9.55068	13.0379	168.069	499.351	12.7201	24.8142	14.6631	57.0472	333.659	164.348	329.529	127.417	268.058	293.319	0.918829	37.902	594.83	267.051	12.7771	32.5941	16.2495	17.6407	64.7638	160.941	169.251	67.7651	37.1916	71.7538	84.9927	17.2003	54.0049	43.5615	128.391	75.3746	25.7711
329	Unknown	wax ester	152, 236	–	2425	3.53	3658.46	19.4731	–	222	71.9441	74.6274	120.512	96.2874	7.56088	9.32069	128.655	258.311	26.1823	37.7818	34.8896	50.7385	148.872	109.506	123.365	35.0579	118.341	92.3127	–	14.843	378.46	231.71	21.6775	22.9621	18.3205	7.13484	54.882	69.3925	69.3599	20.5658	38.1417	28.6873	49.6647	14.6689	34.3673	24.2448	15.6873	48.4411	2.83766
330	Unknown	–	–	–	2445	3.5	3679.4	19.7146	–	243	33.6919	25.3906	54.8862	64.9368	24.2116	18.3234	59.326	135.677	6.8503	3.11178	22.7545	14.0027	118.424	66.7645	108.55	42.1058	99.98	105.399	13.5536	12.6527	173.683	88.1311	28.1763	29.3214	26.4402	6.83433	45.183	54.165	55.5289	46.8609	28.7226	34.0798	17.6662	28.4631	40.0053	35.7112	24.0406	25.9494	5.22777
331	Heptatriacontane	hydrocarbon	–	7194-84-5	2465	3.15	3700.01	679.349	521	113	244.989	156.223	19.4527	49.3992	31.2901	48.4538	35.1235	48.8955	15.2748	25.6114	40.9115	23.8929	25.7764	12.0605	44.4118	25.7447	22.6387	16.3063	–	7.03327	15.2295	3.50388	8.70481	7.79619	25.2335	162.245	0.594145	10.7849	28.7379	2.21158	39.0324	256.987	51.1943	20.3932	37.444	34.686	32.7851	177.139	172.758
332	Unknown	wax ester	152, 236	–	2485	3.87	3720.64	12.6037	–	96	1033.62	562.978	1434.02	1045.92	87.8869	43.0785	312.165	416.657	55.9434	74.2746	323.072	212.944	457.501	201.651	902.299	310.577	616.193	472.643	95.6345	176.958	916.316	326.927	196.387	132.597	106.65	117.252	606.16	378.278	1586.49	478.027	295.597	241.912	150.937	59.6982	317.309	239.693	417.694	355.89	283.762
333	Unknown	wax ester	194, 237, 264	–	2500	4.17	3735.87	19.4816	–	150	86.6108	87.3007	153.789	61.7964	5.1191	22.0712	52.5671	115.093	0.363717	27.3187	12.3001	9.8829	117.966	36.0393	144.442	25.5749	185.162	72.666	2.24817	30.1896	229.927	109.321	10.4145	26.9006	9.0978	12.3945	20.4118	26.3466	11.8055	2.59725	17.6507	36.9814	44.0053	–	10.9878	11.2542	28.8303	35.2442	2.45731
334	Unknown	wax ester	152, 236	–	2520	4.15	3755.76	21.5203	–	237	533.658	440.54	416.887	383.09	52.6771	45.3245	606.49	721.626	75.6886	113.284	159.722	154.008	936.788	475.363	881.772	283.911	934.721	654.326	57.4762	79.8818	1227.62	470.401	105.58	181.339	136.395	95.8339	316.298	312.248	231.659	124.973	254.225	277.225	184.717	135.971	233.086	217.849	329.137	266.248	99.1415
335	Octatriacontane	hydrocarbon	–	7194-85-6	2565	3.6	3800.01	1365.03	535	113	260.232	164.442	13.187	25.2182	11.9037	11.5988	22.6569	5.61632	5.666	16.1564	5.98115	11.9335	7.67598	–	31.8197	21.6416	7.76114	1.47172	3.96141	14.0397	10.0765	2.8727	0.345975	3.38301	2.53693	70.8224	7.25216	–	–	15.0521	28.4531	58.1051	20.1384	12.788	18.7119	18.4398	1.71679	37.982	94.1113
336	Unknown	–	–	–	2565	4.12	3800.42	9.57198	–	122	146.7	154.127	382.311	223.133	20.8729	33.5238	209.601	574.128	27.5835	31.6165	41.3216	42.2457	360.996	254.167	389.405	182.179	357.622	433.598	8.99246	38.1796	585.464	384.161	63.0974	59.0253	33.4522	37.6691	256.679	180.142	411.146	146.411	228.768	136.199	114.776	71.1104	307.212	105.361	149.285	84.5387	42.6343
337	Unknown	wax ester	152, 236	–	2610	4.07	3836.22	3.51252	–	236	195.589	184.537	453.995	337.447	21.7143	48.3564	350.607	724.617	54.5562	56.0832	43.4759	120.003	563.173	351.538	554.655	166.659	565.923	593.676	11.2939	50.8261	968.285	491.764	82.1415	83.0561	53.2191	71.7767	426.342	226.228	719.113	214.22	266.564	190.028	170.675	100.338	346.267	144.24	293.715	205.563	62.426
338	Unknown	–	–	–	2625	4.32	3848.36	3.51706	–	68	246.42	219.04	408.09	401.272	24.2009	22.3311	399.489	792.408	45.544	52.2499	91.2255	103.814	674.78	332.062	585.812	211.681	535.208	654.917	41.7345	48.1661	942.785	554.853	117.39	81.6174	88.5258	68.7121	314.906	271.305	901.693	248.553	241.412	252.569	186.958	133.519	275.702	165.517	254.145	188.239	94.2768
339	Unknown	wax ester	–	–	2645	4.64	3864.55	14.2006	–	71	288.829	209.91	606.729	372.49	30.1916	22.3706	396.279	756.043	59.717	81.4447	73.3593	112.16	918.906	424.175	610.627	207.719	869.139	672.466	45.4923	58.3242	1416.4	626.195	176.378	130.605	87.0071	41.8221	356.506	315.935	936.139	218.578	311.367	259.388	198.672	163.871	285.298	123.437	300.056	164.527	102.128
340	Unknown	–	–	–	2660	4.71	3876.55	14.7553	–	43	236.299	328.578	425.634	463.695	38.8277	8.10912	496.48	888.019	24.829	65.9177	89.0579	134.836	948.138	525.976	657.917	305.764	766.98	694.289	11.1357	75.1331	1136.06	636.139	132.804	165.194	95.7844	98.7778	484.756	376.107	1133.56	324.176	314.413	235.255	206.824	187.27	343.484	230.172	287.096	222.286	123.253
341	Nonatriacontane	hydrocarbon	–	7194-86-7	2695	4.13	3902.91	538.174	549	99	148.059	133.528	–	14.5786	2.44112	9.96474	13.8749	3.88623	0.121757	5.19472	4.27944	12.4274	2.41251	19.5775	11.4901	5.02528	1.0346	7.90286	5.97006	–	–	11.4391	5.06055	–	2.16101	28.2735	6.98381	–	10.2125	–	2.17565	36.4413	14.8004	9.81238	6.1945	19.265	2.43247	13.4025	44.2914
[truncated: 125 more columns]

## Sheet: CHEMICAL DISTANCES L-R AVERAGED
First three PCA scores for all subjects and Euclidean distances among subjects calculated from the PCA scores. Based on left-right averaged relative peak volumes. F - father, P - partner
		PCA scores			Euclidean distances
	PC 1 (21%)	PC 2 (16%)	PC 3 (6%)		01_F	01_P	02_F	02_P	03_F	03_P	04_F	04_P	05_F	05_P	07_F	07_P	13_F	13_P	14_F	14_P	15_F	15_P	16_F	16_P	17_F	17_P	18_F	18_P	19_F	19_P	21_F	21_P	25_F	25_P	28_F	28_P	29_F	29_P	30_F	30_P	31_F	31_P	32_F	32_P	33_F	33_P	34_F	34_P	36_F
01_F	0.4607	0.5537	-0.0597	01_F	1e-35	0.273926	1.31892	0.858272	1.29272	1.15077	0.264288	0.216735	0.213329	0.820742	0.834212	0.874056	0.999882	0.89017	0.928336	1.07614	0.899707	0.965827	0.894486	1.01045	1.25578	1.07421	0.988864	0.993183	0.790587	1.0475	1.17413	1.10429	1.21105	1.19686	0.621637	0.214142	0.841356	1.03338	1.12468	1.01279	1.04586	0.964008	1.27751	1.07394	1.42572	0.874922	0.195608	0.247622	1.42908
01_P	0.4041	0.5371	0.2078	01_P	0.273926	1e-35	1.24561	0.741681	1.26792	1.11217	0.167304	0.126546	0.48471	0.839448	0.724522	0.90426	1.00586	0.937987	0.884731	0.92608	0.878158	0.898417	0.82276	0.810004	1.2131	1.03613	0.959046	0.866175	0.821191	1.00792	1.16176	1.06578	1.18433	1.04677	0.607722	0.0721878	0.832229	1.08815	0.973371	1.11725	0.934835	0.76339	1.18985	1.01978	1.40226	0.901381	0.203258	0.427853	1.41914
02_F	-0.6681	-0.0945	0.1529	02_F	1.31892	1.24561	1e-35	1.08608	0.235644	0.375165	1.36781	1.33654	1.37237	1.19933	1.14684	0.712917	0.62123	0.905325	1.08467	0.774138	0.638841	0.662258	0.541864	0.732541	0.184798	0.366367	0.369359	1.40179	1.17353	0.481764	0.346958	0.360683	0.25991	0.58553	1.28524	1.29167	0.831522	1.51457	0.627853	0.978314	1.49766	1.06683	0.306641	0.31042	0.282421	1.3435	1.19245	1.26944	0.34757
02_P	0.3923	-0.1868	0.3688	02_P	0.858272	0.741681	1.08608	1e-35	1.11375	0.827046	0.903956	0.756856	0.984758	1.414	0.069477	0.687483	0.716583	0.624621	0.265093	0.409509	0.581043	0.469531	0.572589	0.619286	1.02193	0.807574	0.961933	0.32581	0.437235	0.698315	0.968483	0.818908	1.00487	0.641426	1.26813	0.783383	0.455384	0.676431	0.561955	0.908061	0.416406	0.325886	0.858002	0.818166	1.26006	0.479512	0.851066	1.02972	1.26631
03_F	-0.6285	-0.1424	-0.0744	03_F	1.29272	1.26792	0.235644	1.11375	1e-35	0.310323	1.3852	1.34371	1.31079	1.20425	1.16878	0.601075	0.511172	0.795925	1.06122	0.861816	0.579713	0.657764	0.551319	0.878516	0.111636	0.308721	0.33548	1.4382	1.11035	0.43261	0.182838	0.299969	0.111842	0.717309	1.30673	1.30359	0.773388	1.44032	0.744743	0.808132	1.52607	1.16071	0.391029	0.301619	0.150723	1.28751	1.19035	1.23124	0.164873
03_P	-0.3551	-0.2539	0.0211	03_P	1.15077	1.11217	0.375165	0.827046	0.310323	1e-35	1.25106	1.17606	1.18822	1.25967	0.883118	0.384363	0.26346	0.549203	0.760024	0.598426	0.309975	0.359515	0.308788	0.710845	0.229345	0.0921436	0.386464	1.14826	0.83664	0.136152	0.1742	0.0604253	0.204638	0.509416	1.29417	1.15069	0.494879	1.1604	0.51828	0.645789	1.23208	0.909226	0.241107	0.149227	0.449941	1.00522	1.07129	1.14759	0.4464
04_F	0.4509	0.692	0.1653	04_F	0.264288	0.167304	1.36781	0.903956	1.3852	1.25106	1e-35	0.178215	0.45882	0.790351	0.882886	1.03443	1.14289	1.07073	1.04	1.09117	1.02316	1.05624	0.971242	0.955458	1.3385	1.17124	1.06501	1.00722	0.955334	1.1521	1.28621	1.20197	1.3077	1.20373	0.530092	0.128118	0.980939	1.20262	1.13245	1.22638	1.06833	0.921389	1.33527	1.15377	1.51414	1.02837	0.217933	0.381596	1.53099
04_P	0.5153	0.5267	0.1483	04_P	0.216735	0.126546	1.33654	0.756856	1.34371	1.17606	0.178215	1e-35	0.425686	0.913895	0.72915	0.933861	1.04484	0.942149	0.882123	0.989802	0.921529	0.946986	0.889166	0.909091	1.29073	1.10305	1.04142	0.852371	0.791443	1.06534	1.22643	1.13206	1.25654	1.12838	0.678212	0.0821022	0.852318	1.0275	1.05197	1.11471	0.908851	0.816945	1.26814	1.09472	1.48114	0.854179	0.249462	0.428134	1.49245
05_F	0.4623	0.5568	-0.273	05_F	0.213329	0.48471	1.37237	0.984758	1.31079	1.18822	0.45882	0.425686	1e-35	0.838397	0.960572	0.876868	1.01378	0.885501	1.00276	1.20305	0.941058	1.03913	0.969292	1.1649	1.28933	1.11334	1.02144	1.13283	0.822492	1.09181	1.18849	1.14273	1.2342	1.31534	0.690006	0.426923	0.884072	1.04343	1.24676	0.949732	1.17704	1.13233	1.34664	1.124	1.43836	0.912344	0.35768	0.237947	1.43156
05_P	-0.2309	0.9941	-0.0965	05_P	0.820742	0.839448	1.19933	1.414	1.20425	1.25967	0.790351	0.913895	0.838397	1e-35	1.42633	1.17066	1.24879	1.32126	1.49729	1.39767	1.19256	1.28852	1.11489	1.17104	1.21178	1.16846	0.896435	1.63956	1.42075	1.23662	1.19755	1.19937	1.18751	1.37438	0.292709	0.837001	1.27344	1.74481	1.34065	1.36091	1.72293	1.39626	1.34643	1.13133	1.27093	1.56629	0.678755	0.607468	1.29777
07_F	0.4583	-0.1703	0.3547	07_F	0.834212	0.724522	1.14684	0.069477	1.16878	0.883118	0.882886	0.72915	0.960572	1.42633	1e-35	0.719553	0.758788	0.643373	0.274006	0.478406	0.625129	0.525969	0.625817	0.67396	1.07936	0.861581	1.00855	0.280399	0.41757	0.752191	1.02022	0.873819	1.05933	0.710074	1.27039	0.762227	0.486129	0.636166	0.630113	0.923296	0.366058	0.361377	0.922995	0.874066	1.31625	0.440153	0.840516	1.01768	1.32084
07_P	-0.0351	-0.1578	-0.1689	07_P	0.874056	0.90426	0.712917	0.687483	0.601075	0.384363	1.03443	0.933861	0.876868	1.17066	0.719553	1e-35	0.142957	0.215257	0.56545	0.673073	0.169221	0.344729	0.33566	0.814744	0.562468	0.353121	0.503929	0.994073	0.530743	0.289917	0.423285	0.367037	0.498934	0.71531	1.16272	0.924217	0.245156	0.861409	0.677845	0.340789	1.06234	0.88031	0.597125	0.415351	0.744405	0.713521	0.849714	0.895547	0.719486
13_F	-0.1307	-0.2505	-0.1169	13_F	0.999882	1.00586	0.62123	0.716583	0.511172	0.26346	1.14289	1.04484	1.01378	1.24879	0.758788	0.142957	1e-35	0.290782	0.59338	0.62903	0.153707	0.299113	0.309223	0.793042	0.463377	0.25933	0.486053	1.03025	0.611488	0.181338	0.329298	0.262741	0.405739	0.63955	1.2541	1.03267	0.291546	0.930054	0.61559	0.404578	1.10173	0.886315	0.48013	0.334156	0.653092	0.78639	0.961099	1.01943	0.62812
13_P	0.1474	-0.2676	-0.2001	13_P	0.89017	0.937987	0.905325	0.624621	0.795925	0.549203	1.07073	0.942149	0.885501	1.32126	0.643373	0.215257	0.290782	1e-35	0.43704	0.710721	0.295374	0.401979	0.476567	0.915735	0.752718	0.539126	0.717226	0.895928	0.36125	0.440979	0.613585	0.54694	0.692684	0.809036	1.28088	0.951256	0.198462	0.658421	0.761849	0.28508	0.947093	0.882054	0.741862	0.604117	0.936033	0.532983	0.908088	0.956968	0.904926
14_F	0.387	-0.346	0.1569	14_F	0.928336	0.884731	1.08467	0.265093	1.06122	0.760024	1.04	0.882123	1.00276	1.49729	0.274006	0.56545	0.59338	0.43704	1e-35	0.518028	0.49744	0.422537	0.574179	0.794515	0.980681	0.757139	0.958211	0.481701	0.256844	0.629621	0.89445	0.763292	0.94965	0.721792	1.38224	0.912408	0.323284	0.49475	0.654509	0.710765	0.530395	0.575542	0.842382	0.793739	1.20706	0.319136	0.950904	1.08351	1.19666
14_P	0.0082	-0.2487	0.4966	14_P	1.07614	0.92608	0.774138	0.409509	0.861816	0.598426	1.09117	0.989802	1.20305	1.39767	0.478406	0.673073	0.62903	0.710721	0.518028	1e-35	0.507491	0.335426	0.4075	0.358411	0.754022	0.594888	0.775603	0.671404	0.726056	0.511931	0.760254	0.598276	0.766645	0.239477	1.31154	0.98397	0.521035	1.01134	0.168357	0.970204	0.768876	0.355555	0.526537	0.580201	0.990883	0.824456	1.00023	1.17915	1.01385
15_F	-0.0546	-0.1816	-0.0025	15_F	0.899707	0.878158	0.638841	0.581043	0.579713	0.309975	1.02316	0.921529	0.941058	1.19256	0.625129	0.169221	0.153707	0.295374	0.49744	0.507491	1e-35	0.181792	0.189723	0.663869	0.512392	0.281387	0.482656	0.901292	0.537922	0.180151	0.410936	0.294658	0.468619	0.549021	1.1685	0.910261	0.19665	0.881258	0.509594	0.49337	0.979065	0.739709	0.476096	0.329849	0.729034	0.712933	0.85375	0.941034	0.71898
15_P	-0.0247	-0.2511	0.1628	15_P	0.965827	0.898417	0.662258	0.469531	0.657764	0.359515	1.05624	0.946986	1.03913	1.28852	0.525969	0.344729	0.299113	0.401979	0.422537	0.335426	0.181792	1e-35	0.192069	0.556512	0.567924	0.353079	0.581685	0.789362	0.548606	0.232899	0.509174	0.358532	0.54781	0.407807	1.2407	0.940256	0.237169	0.876114	0.361038	0.640927	0.872648	0.599977	0.43358	0.379416	0.802598	0.699157	0.912948	1.0372	0.803559
16_F	-0.1263	-0.0889	0.1467	16_F	0.894486	0.82276	0.541864	0.572589	0.551319	0.308788	0.971242	0.889166	0.969292	1.11489	0.625817	0.33566	0.309223	0.476567	0.574179	0.4075	0.189723	0.192069	1e-35	0.488633	0.465458	0.256271	0.407276	0.897347	0.654366	0.2048	0.422358	0.276624	0.44593	0.410054	1.0872	0.866602	0.333317	1.00786	0.369995	0.674141	0.988554	0.644421	0.392493	0.253542	0.698747	0.820002	0.811295	0.928586	0.710191
16_P	-0.1187	0.0668	0.6098	16_P	1.01045	0.810004	0.732541	0.619286	0.878516	0.710845	0.955458	0.909091	1.1649	1.17104	0.67396	0.814744	0.793042	0.915735	0.794515	0.358411	0.663869	0.556512	0.488633	1e-35	0.779226	0.671056	0.709323	0.85311	0.944754	0.653545	0.826975	0.685159	0.805124	0.337242	1.08496	0.87828	0.727855	1.26541	0.297345	1.15016	0.960827	0.419621	0.611958	0.617163	0.993284	1.05834	0.879602	1.07483	1.03809
17_F	-0.5664	-0.1649	0.0156	17_F	1.25578	1.2131	0.184798	1.02193	0.111636	0.229345	1.3385	1.29073	1.28933	1.21178	1.07936	0.562468	0.463377	0.752718	0.980681	0.754022	0.512392	0.567924	0.465458	0.779226	1e-35	0.231713	0.321495	1.3446	1.04909	0.352749	0.166266	0.220148	0.0818997	0.60601	1.29143	1.25283	0.706942	1.38162	0.634518	0.803182	1.43405	1.05839	0.282636	0.21287	0.240504	1.22263	1.15158	1.21272	0.264872
17_P	-0.3347	-0.1641	0.0179	17_P	1.07421	1.03613	0.366367	0.807574	0.308721	0.0921436	1.17124	1.10305	1.11334	1.16846	0.861581	0.353121	0.25933	0.539126	0.757139	0.594888	0.281387	0.353079	0.256271	0.671056	0.231713	1e-35	0.304834	1.13244	0.819078	0.135274	0.17096	0.0327411	0.197969	0.512844	1.20244	1.07418	0.476739	1.15694	0.513155	0.640508	1.21887	0.883587	0.280309	0.0824851	0.457565	0.992997	0.988591	1.06327	0.459983
18_F	-0.4286	0.1226	-0.0258	18_F	0.988864	0.959046	0.369359	0.961933	0.33548	0.386464	1.06501	1.04142	1.02144	0.896435	1.00855	0.503929	0.486053	0.717226	0.958211	0.775603	0.482656	0.581685	0.407276	0.709323	0.321495	0.304834	1e-35	1.28188	0.975426	0.418337	0.316175	0.329638	0.295083	0.678751	0.97511	0.993342	0.663076	1.33359	0.675148	0.775776	1.37426	0.995189	0.492149	0.265837	0.450591	1.15677	0.869953	0.915769	0.474403
18_P	0.6787	-0.2228	0.5199	18_P	0.993183	0.866175	1.40179	0.32581	1.4382	1.14826	1.00722	0.852371	1.13283	1.63956	0.280399	0.994073	1.03025	0.895928	0.481701	0.671404	0.901292	0.789362	0.897347	0.85311	1.3446	1.13244	1.28188	1e-35	0.611166	1.02053	1.29284	1.14283	1.32952	0.909124	1.45147	0.900097	0.755252	0.688088	0.833799	1.16936	0.107934	0.450052	1.16446	1.14232	1.58358	0.546837	1.01899	1.20692	1.59015
19_F	0.4777	-0.2367	-0.0571	19_F	0.790587	0.821191	1.17353	0.437235	1.11035	0.83664	0.955334	0.791443	0.822492	1.42075	0.41757	0.530743	0.611488	0.36125	0.256844	0.726056	0.537922	0.548606	0.654366	0.944754	1.04909	0.819078	0.975426	0.611166	1e-35	0.705816	0.933165	0.83052	1.00091	0.910065	1.30564	0.829323	0.343766	0.365972	0.841036	0.589063	0.639696	0.754076	0.9751	0.864767	1.25761	0.185498	0.85554	0.944393	1.23747
19_P	-0.2215	-0.235	0.0393	19_P	1.0475	1.00792	0.481764	0.698315	0.43261	0.136152	1.1521	1.06534	1.09181	1.23662	0.752191	0.289917	0.181338	0.440979	0.629621	0.511931	0.180151	0.232899	0.2048	0.653545	0.352749	0.135274	0.418337	1.02053	0.705816	1e-35	0.277197	0.134708	0.321627	0.475485	1.24273	1.0458	0.36266	1.03588	0.463089	0.585853	1.10312	0.80434	0.308776	0.192601	0.578117	0.87418	0.979024	1.06633	0.57352
21_F	-0.4527	-0.1827	-0.1044	21_F	1.17413	1.16176	0.346958	0.968483	0.182838	0.1742	1.28621	1.22643	1.18849	1.19755	1.02022	0.423285	0.329298	0.613585	0.89445	0.760254	0.410936	0.509174	0.422358	0.826975	0.166266	0.17096	0.316175	1.29284	0.933165	0.277197	1e-35	0.162243	0.0894936	0.660064	1.26867	1.19449	0.599785	1.25924	0.671266	0.639453	1.37593	1.05455	0.36091	0.209863	0.325004	1.1103	1.09112	1.13541	0.308222
21_P	-0.3482	-0.1939	0.0192	21_P	1.10429	1.06578	0.360683	0.818908	0.299969	0.0604253	1.20197	1.13206	1.14273	1.19937	0.873819	0.367037	0.262741	0.54694	0.763292	0.598276	0.294658	0.358532	0.276624	0.685159	0.220148	0.0327411	0.329638	1.14283	0.83052	0.134708	0.162243	1e-35	0.18941	0.511145	1.23488	1.10409	0.487604	1.16385	0.515299	0.645233	1.22856	0.895626	0.261521	0.0985487	0.446582	1.00282	1.02011	1.09502	0.447438
25_F	-0.52	-0.1568	-0.0514	25_F	1.21105	1.18433	0.25991	1.00487	0.111842	0.204638	1.3077	1.25654	1.2342	1.18751	1.05933	0.498934	0.405739	0.692684	0.94965	0.766645	0.468619	0.54781	0.44593	0.805124	0.0818997	0.197969	0.295083	1.32952	1.00091	0.321627	0.0894936	0.18941	1e-35	0.640946	1.267	1.22037	0.662543	1.33237	0.660471	0.728104	1.41637	1.06411	0.328376	0.202162	0.26119	1.17735	1.1153	1.16583	0.2643
25_P	-0.2303	-0.2369	0.5147	25_P	1.19686	1.04677	0.58553	0.641426	0.717309	0.509416	1.20373	1.12838	1.31534	1.37438	0.710074	0.71531	0.63955	0.809036	0.721792	0.239477	0.549021	0.407807	0.410054	0.337242	0.60601	0.512844	0.678751	0.909124	0.910065	0.475485	0.660064	0.511145	0.640946	1e-35	1.33127	1.10726	0.638978	1.21507	0.0838171	1.0295	1.00755	0.549069	0.355763	0.475961	0.827249	1.03067	1.09233	1.2574	0.862859
28_F	0.0241	0.9832	0.0468	28_F	0.621637	0.607722	1.28524	1.26813	1.30673	1.29417	0.530092	0.678212	0.690006	0.292709	1.27039	1.16272	1.2541	1.28088	1.38224	1.31154	1.1685	1.2407	1.0872	1.08496	1.29143	1.20244	0.97511	1.45147	1.30564	1.24273	1.26867	1.23488	1.267	1.33127	1e-35	0.601441	1.21127	1.60985	1.28374	1.36687	1.52959	1.24087	1.37319	1.16709	1.39837	1.42851	0.476681	0.457215	1.42537
28_P	0.4427	0.5647	0.1534	28_P	0.214142	0.0721878	1.29167	0.783383	1.30359	1.15069	0.128118	0.0821022	0.426923	0.837001	0.762227	0.924217	1.03267	0.951256	0.912408	0.98397	0.910261	0.940256	0.866602	0.87828	1.25283	1.07418	0.993342	0.900097	0.829323	1.0458	1.19449	1.10409	1.22037	1.10726	0.601441	1e-35	0.858393	1.08468	1.03355	1.11855	0.962969	0.824408	1.23937	1.06133	1.43778	0.905656	0.18321	0.384631	1.45179
29_F	0.1379	-0.2215	-0.0073	29_F	0.841356	0.832229	0.831522	0.455384	0.773388	0.494879	0.980939	0.852318	0.884072	1.27344	0.486129	0.245156	0.291546	0.198462	0.323284	0.521035	0.19665	0.237169	0.333317	0.727855	0.706942	0.476739	0.663076	0.755252	0.343766	0.36266	0.599785	0.487604	0.662543	0.638978	1.21127	0.858393	1e-35	0.687212	0.582853	0.474291	0.821769	0.688363	0.641058	0.523664	0.921589	0.516474	0.832851	0.928156	0.906868
29_P	0.7826	-0.4258	-0.1293	29_P	1.03338	1.08815	1.51457	0.676431	1.44032	1.1604	1.20262	1.0275	1.04343	1.74481	0.636166	0.861409	0.930054	0.658421	0.49475	1.01134	0.881258	0.876114	1.00786	1.26541	1.38162	1.15694	1.33359	0.688088	0.365972	1.03588	1.25924	1.16385	1.33237	1.21507	1.60985	1.08468	0.687212	1e-35	1.14826	0.811247	0.656643	0.995267	1.29322	1.20936	1.5828	0.213787	1.14163	1.21411	1.5547
30_F	-0.1546	-0.2058	0.4966	30_F	1.12468	0.973371	0.627853	0.561955	0.744743	0.51828	1.13245	1.05197	1.24676	1.34065	0.630113	0.677845	0.61559	0.761849	0.654509	0.168357	0.509594	0.361038	0.369995	0.297345	0.634518	0.513155	0.675148	0.833799	0.841036	0.463089	0.671266	0.515299	0.660471	0.0838171	1.28374	1.03355	0.582853	1.14826	1e-35	0.99487	0.933415	0.475983	0.400257	0.480627	0.864051	0.959613	1.02532	1.19516	0.896216
30_P	0.0615	-0.281	-0.4716	30_P	1.01279	1.11725	0.978314	0.908061	0.808132	0.645789	1.22638	1.11471	0.949732	1.36091	0.923296	0.340789	0.404578	0.28508	0.710765	0.970204	0.49337	0.640927	0.674141	1.15016	0.803182	0.640508	0.775776	1.16936	0.589063	0.585853	0.639453	0.645233	0.728104	1.0295	1.36687	1.11855	0.474291	0.811247	0.99487	1e-35	1.21273	1.16117	0.875965	0.715141	0.924947	0.740256	1.04269	1.02871	0.874006
31_F	0.7768	-0.2661	0.5076	31_F	1.04586	0.934835	1.49766	0.416406	1.52607	1.23208	1.06833	0.908851	1.17704	1.72293	0.366058	1.06234	1.10173	0.947093	0.530395	0.768876	0.979065	0.872648	0.988554	0.960827	1.43405	1.21887	1.37426	0.107934	0.639696	1.10312	1.37593	1.22856	1.41637	1.00755	1.52959	0.962969	0.821769	0.656643	0.933415	1.21273	1e-35	0.556448	1.25545	1.233	1.67199	0.544686	1.08786	1.26769	1.67543
31_P	0.2754	-0.0715	0.6503	31_P	0.964008	0.76339	1.06683	0.325886	1.16071	0.909226	0.921389	0.816945	1.13233	1.39626	0.361377	0.88031	0.886315	0.882054	0.575542	0.355555	0.739709	0.599977	0.644421	0.419621	1.05839	0.883587	0.995189	0.450052	0.754076	0.80434	1.05455	0.895626	1.06411	0.549069	1.24087	0.824408	0.688363	0.995267	0.475983	1.16117	0.556448	1e-35	0.861544	0.863971	1.29524	0.800811	0.901128	1.11728	1.32137
32_F	-0.4495	-0.2912	0.2398	32_F	1.27751	1.18985	0.306641	0.858002	0.391029	0.241107	1.33527	1.26814	1.34664	1.34643	0.922995	0.597125	0.48013	0.741862	0.842382	0.526537	0.476096	0.43358	0.392493	0.611958	0.282636	0.280309	0.492149	1.16446	0.9751	0.308776	0.36091	0.261521	0.328376	0.355763	1.37319	1.23937	0.641058	1.29322	0.400257	0.875965	1.25545	0.861544	1e-35	0.253785	0.491889	1.1282	1.17598	1.28519	0.519855
32_P	-0.3682	-0.1156	0.0756	32_P	1.07394	1.01978	0.31042	0.818166	0.301619	0.149227	1.15377	1.09472	1.124	1.13133	0.874066	0.415351	0.334156	0.604117	0.793739	0.580201	0.329849	0.379416	0.253542	0.617163	0.21287	0.0824851	0.265837	1.14232	0.864767	0.192601	0.209863	0.0985487	0.202162	0.475961	1.16709	1.06133	0.523664	1.20936	0.480627	0.715141	1.233	0.863971	0.253785	1e-35	0.446441	1.03746	0.97475	1.05799	0.463255
33_F	-0.7764	-0.1538	-0.1011	33_F	1.42572	1.40226	0.282421	1.26006	0.150723	0.449941	1.51414	1.48114	1.43836	1.27093	1.31625	0.744405	0.653092	0.936033	1.20706	0.990883	0.729034	0.802598	0.698747	0.993284	0.240504	0.457565	0.450591	1.58358	1.25761	0.578117	0.325004	0.446582	0.26119	0.827249	1.39837	1.43778	0.921589	1.5828	0.864051	0.924947	1.67199	1.29524	0.491889	0.446441	1e-35	1.43434	1.31801	1.34959	0.0814278
33_P	0.6482	-0.3	-0.0206	33_P	0.874922	0.901381	1.3435	0.479512	1.28751	1.00522	1.02837	0.854179	0.912344	1.56629	0.440153	0.713521	0.78639	0.532983	0.319136	0.824456	0.712933	0.699157	0.820002	1.05834	1.22263	0.992997	1.15677	0.546837	0.185498	0.87418	1.1103	1.00282	1.17735	1.03067	1.42851	0.905656	0.516474	0.213787	0.959613	0.740256	0.544686	0.800811	1.1282	1.03746	1.43434	1e-35	0.961789	1.05716	1.41408
34_F	0.2993	0.594	0.0432	34_F	0.195608	0.203258	1.19245	0.851066	1.19035	1.07129	0.217933	0.249462	0.35768	0.678755	0.840516	0.849714	0.961099	0.908088	0.950904	1.00023	0.85375	0.912948	0.811295	0.879602	1.15158	0.988591	0.869953	1.01899	0.85554	0.979024	1.09112	1.02011	1.1153	1.09233	0.476681	0.18321	0.832851	1.14163	1.02532	1.04269	1.08786	0.901128	1.17598	0.97475	1.31801	0.961789	1e-35	0.23672	1.33086
34_P	0.2825	0.6795	-0.1769	34_P	0.247622	0.427853	1.26944	1.02972	1.23124	1.14759	0.381596	0.428134	0.237947	0.607468	1.01768	0.895547	1.01943	0.956968	1.08351	1.17915	0.941034	1.0372	0.928586	1.07483	1.21272	1.06327	0.915769	1.20692	0.944393	1.06633	1.13541	1.09502	1.16583	1.2574	0.457215	0.384631	0.928156	1.21411	1.19516	1.02871	1.26769	1.11728	1.28519	1.05799	1.34959	1.05716	0.23672	1e-35	1.35367
36_F	-0.7538	-0.1914	-0.1697	36_F	1.42908	1.41914	0.34757	1.26631	0.164873	0.4464	1.53099	1.49245	1.43156	1.29777	1.32084	0.719486	0.62812	0.904926	1.19666	1.01385	0.71898	0.803559	0.710191	1.03809	0.264872	0.459983	0.474403	1.59015	1.23747	0.57352	0.308222	0.447438	0.2643	0.862859	1.42537	1.45179	0.906868	1.5547	0.896216	0.874006	1.67543	1.32137	0.519855	0.463255	0.0814278	1.41408	1.33086	1.35367	1e-35
36_P	-0.4028	-0.2794	0.0652	36_P	1.20635	1.15676	0.335057	0.856114	0.29866	0.0697879	1.29709	1.22459	1.2498	1.29518	0.91499	0.45254	0.328685	0.610936	0.79789	0.596632	0.367956	0.391518	0.345521	0.705093	0.205756	0.142018	0.412978	1.17456	0.889978	0.188446	0.201507	0.111389	0.205821	0.483335	1.33295	1.19798	0.548603	1.21014	0.503116	0.70974	1.2599	0.919521	0.181122	0.167737	0.427794	1.0547	1.12083	1.20322	0.43142
37_F	0.3895	0.5753	0.0361	37_F	0.1213	0.176503	1.2573	0.831561	1.25045	1.11455	0.184612	0.175432	0.318096	0.760179	0.813731	0.871634	0.987908	0.908231	0.929189	1.01805	0.878415	0.933033	0.8482	0.919767	1.20916	1.03514	0.937047	0.977068	0.822076	1.01485	1.14176	1.06591	1.17082	1.12822	0.547735	0.129236	0.836706	1.08816	1.05746	1.04814	1.03936	0.899228	1.22321	1.02616	1.38193	0.914489	0.0923912	0.260145	1.39188
37_P	-0.1554	1.0181	-0.0548	37_P	0.771538	0.783173	1.24253	1.38967	1.25338	1.28982	0.722762	0.855898	0.801225	0.0895273	1.39879	1.18753	1.27036	1.32884	1.48317	1.39125	1.20506	1.29433	1.12557	1.16104	1.25434	1.19793	0.936696	1.60182	1.40547	1.25837	1.23805	1.22947	1.23018	1.3802	0.209191	0.778872	1.27471	1.72344	1.34238	1.38146	1.68359	1.36747	1.37388	1.16085	1.32708	1.54413	0.629458	0.566846	1.35432
39_F	0.3357	0.6416	-0.1125	39_F	0.161676	0.343789	1.27275	0.959739	1.2433	1.13885	0.304933	0.33686	0.221312	0.667494	0.944716	0.883014	1.00667	0.932617	1.02497	1.12734	0.917656	1.0013	0.902363	1.02888	1.21681	1.05622	0.927918	1.12462	0.891428	1.04974	1.14066	1.08771	1.17192	1.21881	0.489042	0.296758	0.891703	1.1573	1.15303	1.02729	1.18449	1.04595	1.26916	1.05081	1.36732	0.99635	0.166833	0.0917279	1.37265
39_P	-0.2478	0.9092	-0.1723	39_P	0.800644	0.841373	1.1357	1.37976	1.12267	1.18394	0.805811	0.911818	0.799105	0.115062	1.39342	1.088	1.16691	1.2417	1.4446	1.3615	1.12071	1.22815	1.05486	1.15671	1.136	1.09348	0.820299	1.61832	1.36114	1.1639	1.11303	1.12409	1.10683	1.33635	0.356946	0.837586	1.20602	1.68695	1.30359	1.26563	1.701	1.38282	1.2851	1.06121	1.18931	1.51261	0.667165	0.577928	1.21135
40_F	-0.3228	1.1487	-0.0188	40_F	0.984668	0.976619	1.30164	1.5637	1.32796	1.40354	0.917104	1.05699	1.01555	0.195918	1.57778	1.3462	1.41573	1.50328	1.66398	1.52575	1.35716	1.44267	1.26398	1.26779	1.33644	1.31337	1.03156	1.78163	1.6005	1.38862	1.34046	1.34338	1.32071	1.48764	0.389914	0.97811	1.44562	1.92696	1.45897	1.54815	1.86759	1.51474	1.46841	1.26863	1.38168	1.74401	0.83579	0.782005	1.41577
40_P	0.1814	0.4588	-0.1518	40_P	0.309026	0.430161	1.0586	0.855747	1.01162	0.908663	0.477038	0.454048	0.321245	0.677935	0.853805	0.653728	0.775713	0.728798	0.886155	0.975181	0.698641	0.803373	0.695526	0.907612	0.988043	0.826536	0.707818	1.07846	0.761894	0.824746	0.903245	0.85775	0.938619	1.04772	0.582392	0.415499	0.696836	1.0698	0.987427	0.814833	1.14664	0.966136	1.05541	0.826865	1.13808	0.900496	0.264961	0.244049	1.13916
43_F	-0.8476	-0.1411	-0.1433	43_F	1.48371	1.46628	0.349466	1.34227	0.229682	0.531326	1.57334	1.54547	1.48987	1.29274	1.39794	0.813075	0.72568	1.00462	1.28699	1.07398	0.80642	0.884851	0.779165	1.06849	0.323866	0.538127	0.508827	1.66616	1.33154	0.658909	0.398986	0.527821	0.340608	0.907304	1.43529	1.50035	0.998083	1.65493	0.945467	0.976635	1.75442	1.37687	0.57252	0.527628	0.0837351	1.50921	1.37497	1.39701	0.109661
43_P	-0.2861	-0.2494	0.2564	43_P	1.14132	1.04753	0.425006	0.690492	0.487971	0.24525	1.19904	1.12083	1.22079	1.29378	0.755017	0.502266	0.404355	0.629798	0.687237	0.37988	0.353862	0.277658	0.251655	0.502888	0.379069	0.257915	0.488188	1.00049	0.825732	0.226965	0.402965	0.251397	0.397523	0.264554	1.2882	1.0975	0.500092	1.14978	0.277289	0.807346	1.09231	0.708582	0.169477	0.23944	0.61428	0.97581	1.04856	1.17214	0.635349
44_F	0.3791	-0.2204	-0.2462	44_F	0.80042	0.883486	1.12772	0.616059	1.02511	0.782062	1.00347	0.855768	0.7821	1.3673	0.608164	0.425976	0.526802	0.240911	0.422288	0.830734	0.49899	0.575568	0.653523	1.03103	0.982644	0.76317	0.904768	0.822603	0.213884	0.665165	0.844642	0.774664	0.922157	0.974992	1.28861	0.883237	0.339488	0.467618	0.914768	0.394141	0.853503	0.914679	0.963217	0.820363	1.16648	0.360064	0.867968	0.907719	1.13585
44_P	0.2506	-0.2367	-0.092	44_P	0.818485	0.843925	0.961357	0.484671	0.884318	0.616409	0.98428	0.842965	0.840964	1.32164	0.497081	0.306208	0.382361	0.152613	0.304142	0.636672	0.32279	0.375394	0.469975	0.849128	0.827177	0.599937	0.771227	0.746917	0.229766	0.490021	0.705479	0.61054	0.775794	0.774177	1.24849	0.859864	0.141797	0.565839	0.715256	0.426401	0.798292	0.760865	0.77666	0.652433	1.03038	0.40889	0.843038	0.920678	1.00842
45_F	-0.4404	0.1337	-0.0457	45_F	0.994272	0.969626	0.378635	0.983829	0.335315	0.402458	1.07268	1.0514	1.02252	0.886994	1.02976	0.514216	0.498591	0.728279	0.977625	0.800975	0.500122	0.603614	0.43038	0.733244	0.329842	0.322339	0.0256605	1.3036	0.990067	0.437129	0.322034	0.34646	0.301262	0.703942	0.972608	1.00263	0.679759	1.3475	0.700736	0.777991	1.39555	1.01926	0.511989	0.286491	0.44567	1.17208	0.875749	0.915257	0.468279
45_P	-0.7794	0.0659	-0.3216	45_P	1.35808	1.37948	0.513095	1.38325	0.356746	0.632255	1.4638	1.45237	1.3361	1.1014	1.43006	0.792049	0.750215	0.992443	1.32632	1.17845	0.829708	0.95116	0.818418	1.14194	0.460805	0.604912	0.462356	1.70808	1.31978	0.729412	0.464447	0.607926	0.435766	1.04527	1.27388	1.40284	1.01135	1.64881	1.06473	0.921929	1.79431	1.44086	0.742647	0.59983	0.311283	1.50417	1.25521	1.23494	0.299887
46_F	-0.2652	-0.1065	0.0733	46_F	0.990194	0.938229	0.410863	0.72531	0.393816	0.180371	1.07651	1.00784	1.04362	1.11415	0.778915	0.337992	0.273865	0.520518	0.699796	0.523595	0.236089	0.29455	0.158084	0.582518	0.312188	0.105911	0.298341	1.05068	0.765413	0.139921	0.269332	0.132116	0.288103	0.46158	1.12776	0.978799	0.426862	1.11395	0.448638	0.658862	1.14011	0.791456	0.30952	0.103427	0.542197	0.938381	0.900148	0.990137	0.552256
46_P	-0.2702	-0.1332	0.0562	46_P	1.00969	0.96279	0.411306	0.734505	0.381471	0.151686	1.10129	1.03003	1.05879	1.13827	0.788157	0.326416	0.251363	0.508078	0.698095	0.533666	0.22863	0.292462	0.17567	0.607804	0.300645	0.0811292	0.311846	1.05993	0.763481	0.114108	0.24809	0.105534	0.273011	0.471771	1.15458	1.00237	0.422344	1.10834	0.461071	0.640658	1.14788	0.808975	0.301366	0.10144	0.530477	0.936578	0.923753	1.0101	0.536924
47_F	0.539	-0.2247	-0.1446	47_F	0.786922	0.850131	1.25002	0.535291	1.1725	0.909793	0.971668	0.806817	0.795683	1.4424	0.508697	0.578495	0.670769	0.397833	0.358776	0.832744	0.611891	0.642611	0.738865	1.04243	1.11855	0.890747	1.03488	0.679029	0.107508	0.782487	0.993403	0.90272	1.06526	1.01324	1.32694	0.849253	0.423961	0.316254	0.944762	0.581468	0.695433	0.851364	1.06269	0.939895	1.31803	0.181578	0.873496	0.940432	1.29347
47_P	0.0373	-0.0847	-0.0517	47_P	0.766085	0.767149	0.734538	0.559705	0.668681	0.433482	0.90632	0.801432	0.8007	1.11254	0.591379	0.155953	0.244877	0.259994	0.48382	0.573041	0.142323	0.278466	0.257187	0.696326	0.612711	0.386694	0.510595	0.870168	0.465924	0.312808	0.502475	0.406893	0.561945	0.644658	1.07251	0.79255	0.175516	0.823312	0.5934	0.46415	0.944766	0.741397	0.603812	0.426134	0.818122	0.648475	0.733678	0.812281	0.806937
48_F	-0.3255	0.9662	-0.0221	48_F	0.88864	0.877096	1.12831	1.41331	1.15045	1.22122	0.844453	0.96392	0.922598	0.123543	1.43107	1.17015	1.23584	1.33326	1.50385	1.36249	1.1795	1.26747	1.08693	1.11847	1.15708	1.13105	0.849885	1.648	1.44683	1.20726	1.15885	1.16106	1.1401	1.32086	0.35673	0.884383	1.27499	1.78243	1.293	1.38106	1.73615	1.37478	1.29036	1.08704	1.20994	1.5973	0.730186	0.6898	1.24309
48_P	0.797	0.2821	-0.1729	48_P	0.446854	0.603596	1.54741	0.822854	1.49062	1.2854	0.634179	0.492294	0.444414	1.25274	0.77314	0.941232	1.07118	0.851405	0.819376	1.16284	0.984518	1.03547	1.04512	1.22372	1.44714	1.23136	1.24466	0.865385	0.620093	1.16179	1.3351	1.25497	1.39352	1.34071	1.06639	0.558447	0.845842	0.709388	1.26167	0.973275	0.874078	1.0367	1.43274	1.25603	1.63424	0.61982	0.625848	0.650118	1.62148
50_F	0.6084	-0.2656	-0.1912	50_F	0.842829	0.919384	1.33309	0.605399	1.2485	0.986681	1.03387	0.866987	0.839272	1.51665	0.574125	0.652848	0.742979	0.46109	0.420304	0.913014	0.69443	0.725494	0.827758	1.13171	1.19711	0.97132	1.11956	0.715847	0.189474	0.861859	1.06787	0.982086	1.14222	1.0966	1.39912	0.914114	0.507084	0.244625	1.02899	0.614785	0.718805	0.925573	1.14261	1.02344	1.39222	0.178527	0.943079	0.999815	1.36439
50_P	0.9718	-0.4165	-0.5251	50_P	1.19126	1.32995	1.80351	1.08979	1.685	1.4441	1.40597	1.24559	1.12715	1.90262	1.04802	1.09893	1.1873	0.898572	0.901158	1.41441	1.17549	1.22212	1.32833	1.64644	1.64976	1.43718	1.58147	1.10248	0.703908	1.33246	1.50361	1.44507	1.5866	1.59953	1.78448	1.30501	1.00076	0.438795	1.53527	0.921883	1.06166	1.4091	1.61891	1.49899	1.81796	0.610581	1.34027	1.34074	1.77614
52_F	-0.5886	-0.2349	-0.2368	52_F	1.32449	1.33383	0.42178	1.15379	0.191107	0.348419	1.44962	1.39532	1.31624	1.28766	1.20418	0.562954	0.473594	0.73764	1.05789	0.945641	0.585571	0.691322	0.61815	1.01418	0.262866	0.366538	0.44489	1.47607	1.08134	0.45934	0.196783	0.353566	0.212553	0.832547	1.39269	1.36206	0.762005	1.38859	0.852689	0.692738	1.55545	1.24906	0.499666	0.400503	0.24548	1.25724	1.24653	1.26433	0.183537
52_P	-0.0126	-0.3224	0.0356	52_P	1.00032	0.970583	0.703831	0.541621	0.651025	0.349584	1.12279	1.00616	1.04583	1.341	0.588817	0.263476	0.205848	0.290099	0.418271	0.467317	0.15179	0.146321	0.282477	0.70174	0.576108	0.359333	0.612251	0.849919	0.506292	0.226477	0.482498	0.359734	0.540784	0.533142	1.30616	1.00405	0.186203	0.818674	0.496267	0.514253	0.92147	0.723706	0.483273	0.413301	0.794042	0.663564	0.968054	1.06585	0.780184
55_F	-0.4466	-0.2084	-0.2552	55_F	1.20092	1.22222	0.478102	1.04575	0.264825	0.294592	1.33905	1.2761	1.18825	1.23196	1.09191	0.423486	0.347408	0.59948	0.940026	0.879585	0.467161	0.595438	0.527632	0.965131	0.299294	0.298442	0.403124	1.36649	0.945714	0.371629	0.153096	0.29187	0.222676	0.800215	1.31631	1.24719	0.635032	1.25461	0.80652	0.557015	1.44288	1.16617	0.501886	0.352402	0.368098	1.12339	1.13545	1.15156	0.319329
55_P	-0.2633	-0.2557	0.1745	55_P	1.11092	1.03685	0.436251	0.687249	0.456245	0.178779	1.18672	1.10411	1.17767	1.27925	0.748647	0.423773	0.320193	0.556005	0.656775	0.421319	0.283506	0.238931	0.217633	0.560715	0.354067	0.194967	0.458863	1.00387	0.776583	0.14302	0.344944	0.187471	0.355959	0.342313	1.27819	1.08256	0.441794	1.10233	0.34359	0.723588	1.09219	0.741966	0.200486	0.20103	0.591279	0.933198	1.0275	1.13841	0.602659
56_F	0.6179	-0.3146	-0.0177	56_F	0.883414	0.906617	1.31581	0.465414	1.25952	0.975663	1.03664	0.863637	0.921264	1.56185	0.430089	0.688373	0.75786	0.506803	0.29118	0.800363	0.685694	0.670483	0.794859	1.0401	1.19419	0.965072	1.13418	0.54876	0.165157	0.84509	1.08217	0.97431	1.14928	1.00446	1.42865	0.912764	0.489056	0.227917	0.934397	0.718843	0.550946	0.789068	1.09827	1.0103	1.40602	0.0337588	0.964764	1.06117	1.38558
56_P	-0.6705	-0.0746	0.0344	56_P	1.29739	1.2486	0.120183	1.1198	0.134901	0.363046	1.36468	1.33441	1.33282	1.16297	1.17726	0.672299	0.587551	0.872468	1.09862	0.839389	0.626214	0.681686	0.55585	0.809668	0.139084	0.347914	0.317848	1.44153	1.16319	0.476816	0.279978	0.344007	0.191752	0.67142	1.26553	1.28922	0.822696	1.50388	0.704979	0.913488	1.53469	1.12875	0.37141	0.307837	0.189335	1.33895	1.17797	1.2335	0.249475
58_F	0.0611	-0.1182	-0.0545	58_F	0.781765	0.784773	0.758491	0.541832	0.690311	0.444244	0.92557	0.814446	0.815064	1.15076	0.572649	0.154629	0.241214	0.22576	0.450326	0.568806	0.14181	0.268781	0.276512	0.712634	0.633128	0.404977	0.546456	0.849886	0.433133	0.319849	0.520231	0.422716	0.582389	0.650379	1.10667	0.80944	0.137102	0.787893	0.598257	0.447746	0.921986	0.738139	0.61421	0.448588	0.839551	0.615538	0.757307	0.836854	0.826251
58_P	-0.1806	-0.1254	-0.084	58_P	0.934362	0.930552	0.542893	0.732811	0.448325	0.24085	1.06258	0.981567	0.956263	1.1207	0.776316	0.171546	0.138645	0.375878	0.654879	0.622852	0.16024	0.317829	0.239798	0.722586	0.400402	0.188754	0.355521	1.05479	0.668184	0.169964	0.278815	0.208404	0.342405	0.611019	1.1349	0.959739	0.341409	1.00997	0.586717	0.48276	1.1342	0.866047	0.452375	0.246499	0.596722	0.849361	0.874082	0.93325	0.583317
60_F	-0.7642	-0.0062	-0.0205	60_F	1.34737	1.30852	0.217025	1.23356	0.199675	0.480051	1.41367	1.39628	1.37296	1.13613	1.28927	0.759336	0.685783	0.965195	1.21334	0.960625	0.731178	0.800272	0.664614	0.905139	0.256152	0.459214	0.359507	1.55593	1.26364	0.591987	0.367728	0.458108	0.288563	0.790386	1.26683	1.34639	0.927531	1.60639	0.82392	0.980197	1.64958	1.23895	0.498013	0.421924	0.168615	1.44263	1.22284	1.26104	0.23805
60_P	0.1441	-0.1782	-0.364	60_P	0.853529	0.95195	0.966364	0.77374	0.82587	0.635006	1.06374	0.947167	0.806075	1.25955	0.784419	0.265693	0.376564	0.186726	0.598744	0.874112	0.412523	0.557966	0.584727	1.03797	0.805657	0.612614	0.729962	1.03396	0.457054	0.547303	0.650832	0.624058	0.734306	0.95694	1.23774	0.953292	0.359372	0.723928	0.911381	0.170201	1.08061	1.02831	0.854227	0.677952	0.957618	0.621993	0.886675	0.888713	0.918777
61_F	-0.7334	-0.1335	-0.36	61_F	1.41007	1.43736	0.518509	1.34208	0.304386	0.550313	1.53622	1.50116	1.38339	1.26231	1.39007	0.724384	0.660329	0.905185	1.25205	1.13886	0.768693	0.888485	0.792026	1.16554	0.41225	0.550188	0.519788	1.6662	1.25266	0.657103	0.382811	0.543893	0.375921	1.01435	1.40937	1.46091	0.94409	1.56106	1.03634	0.816135	1.74672	1.42907	0.682077	0.568717	0.26323	1.43239	1.32601	1.31398	0.199957
61_P	0.2886	-0.2645	0.0772	61_P	0.847237	0.820341	0.974631	0.319095	0.937531	0.646227	0.974164	0.826103	0.909585	1.37264	0.338641	0.420395	0.462259	0.311195	0.150588	0.504748	0.361954	0.32506	0.455859	0.747874	0.862983	0.634113	0.821481	0.591524	0.233598	0.512356	0.767591	0.643321	0.825816	0.679283	1.27579	0.846833	0.178044	0.559192	0.612999	0.594162	0.650835	0.604869	0.756269	0.673469	1.08548	0.374349	0.85924	0.97762	1.07373
63_F	0.9174	-0.5253	-0.5443	63_F	1.26793	1.39922	1.78479	1.10637	1.66049	1.41866	1.48424	1.32215	1.20485	1.95645	1.07005	1.08777	1.16477	0.88192	0.897304	1.40948	1.16467	1.20943	1.32561	1.66013	1.62636	1.41926	1.58124	1.13182	0.716931	1.31223	1.47921	1.42447	1.5636	1.58804	1.85012	1.37849	0.994125	0.447545	1.52798	0.893047	1.09245	1.43009	1.59312	1.48489	1.7898	0.630468	1.40714	1.41054	1.74491
63_P	0.3723	-0.3823	-0.192	63_P	0.949428	1.00307	1.13323	0.594236	1.03585	0.768771	1.13488	0.981088	0.946874	1.50581	0.592639	0.465734	0.525376	0.25259	0.351091	0.790309	0.508364	0.548366	0.670375	1.04195	0.985656	0.769102	0.961243	0.791279	0.224737	0.654061	0.853311	0.774093	0.931031	0.940049	1.42929	1.01048	0.33899	0.417336	0.884842	0.430156	0.816433	0.903026	0.932795	0.831312	1.17473	0.33507	1.00688	1.0657	1.14238
66_F	0.0342	-0.2314	0.1922	66_F	0.928298	0.853031	0.716597	0.401761	0.719839	0.425836	1.01343	0.898944	1.01042	1.28665	0.458258	0.374984	0.350856	0.409907	0.372622	0.305998	0.219713	0.0687143	0.219401	0.535436	0.629548	0.413518	0.622112	0.723078	0.508794	0.297949	0.572202	0.421385	0.609954	0.417129	1.22331	0.89563	0.22506	0.83741	0.35911	0.66621	0.807549	0.54185	0.489701	0.434662	0.865517	0.653442	0.879639	1.01372	0.868053
66_P	0.4813	-0.3794	-0.43	66_P	1.0041	1.11925	1.31987	0.826497	1.18923	0.958544	1.22605	1.07546	0.949463	1.5827	0.812407	0.619636	0.699422	0.420526	0.595365	1.04857	0.713491	0.789879	0.886652	1.28073	1.15855	0.955418	1.11503	0.982751	0.399288	0.857334	1.00849	0.961385	1.09339	1.19128	1.51428	1.11048	0.567037	0.4282	1.13714	0.43318	0.989571	1.14204	1.15013	1.02317	1.31942	0.449186	1.09752	1.10673	1.27615
[truncated: 37 more columns]

## Sheet: CHEMICAL DISTANCES LEFT
First three PCA scores for all subjects and Euclidean distances among subjects calculated from the PCA scores. Based on left axilla samples relative peak volumes. F - father, P - partner
		PCA scores			Euclidean distances
	PC 1 (18%)	PC 2 (15%)	PC 3 (7%)		01_F	01_P	02_F	02_P	03_F	03_P	04_F	04_P	05_F	05_P	07_F	07_P	13_F	13_P	14_F	14_P	15_F	15_P	16_F	16_P	17_F	17_P	18_F	18_P	19_F	19_P	21_F	21_P	25_F	25_P	28_F	28_P	29_F	29_P	30_F	30_P	31_F	31_P	32_F	32_P	33_F	33_P	34_F	34_P	36_F
01_F	0.4318	0.502	0.1623	01_F	1e-35	0.322203	1.24663	0.789872	1.16449	1.07673	0.48745	0.319721	0.297954	0.725552	0.971153	0.955112	1.09219	0.974359	1.02923	1.04013	0.723137	0.938773	0.704413	1.01745	1.31299	0.977285	0.994077	1.13359	0.797012	1.19626	1.10539	1.13591	1.08436	1.14605	0.504246	0.355391	0.876773	0.848038	1.01587	1.04333	0.960791	0.696489	1.09465	0.933552	1.415	0.901113	0.0773676	0.348409	1.15402
01_P	0.3503	0.5849	-0.1382	01_P	0.322203	1e-35	1.17938	0.745745	1.11191	1.02131	0.209779	0.196726	0.599487	0.729925	0.866026	0.904447	1.29848	1.13976	1.00808	0.939955	0.824707	0.869242	0.687307	0.886833	1.2968	0.962822	0.939812	1.02188	0.845108	1.17538	1.10209	1.11768	1.13546	1.00377	0.383829	0.105046	0.847481	0.96349	0.941183	1.27948	0.941381	0.590895	1.03047	0.877615	1.39591	1.05867	0.254013	0.480948	1.15163
02_F	-0.6248	-0.0783	-0.1554	02_F	1.24663	1.17938	1e-35	0.61134	0.093202	0.243827	1.33308	1.29927	1.27555	1.10153	1.18192	0.445665	1.06169	0.94286	1.10758	0.654612	0.795946	0.7341	0.604136	0.377109	0.222283	0.447993	0.267304	1.34579	1.0597	0.181917	0.276309	0.216846	0.440486	0.559473	1.169	1.07624	0.576902	1.21583	0.503273	1.22331	1.47072	0.9523	0.236024	0.419951	0.320216	1.31369	1.20108	1.20024	0.274836
02_P	-0.0136	-0.0657	-0.159	02_P	0.789872	0.745745	0.61134	1e-35	0.542938	0.376091	0.90503	0.79501	0.805577	1.02268	0.637555	0.188703	0.920477	0.665898	0.574666	0.300544	0.350477	0.241267	0.139863	0.378793	0.706341	0.245053	0.476741	0.823692	0.477054	0.567625	0.475791	0.496649	0.570187	0.424957	0.918635	0.664638	0.103409	0.659848	0.230301	0.958734	0.874799	0.374722	0.387267	0.19416	0.86295	0.783732	0.738711	0.90616	0.51123
03_F	-0.5531	-0.0621	-0.0981	03_F	1.16449	1.11191	0.093202	0.542938	1e-35	0.187581	1.27322	1.22883	1.18555	1.04053	1.13668	0.385844	0.980892	0.860912	1.05638	0.622652	0.709616	0.686112	0.524063	0.354107	0.219263	0.379428	0.195102	1.30661	0.989837	0.130402	0.200117	0.144672	0.364218	0.554225	1.10715	1.00964	0.511001	1.14081	0.461884	1.13855	1.41143	0.893936	0.191042	0.356552	0.341557	1.23552	1.12118	1.12157	0.211751
03_P	-0.3852	-0.1235	-0.1549	03_P	1.07673	1.02131	0.243827	0.376091	0.187581	1e-35	1.18039	1.11631	1.09169	1.07318	0.955821	0.203014	0.952565	0.772938	0.869702	0.441819	0.581992	0.499912	0.390364	0.262565	0.357453	0.21396	0.250608	1.12459	0.816596	0.225963	0.196497	0.173855	0.385231	0.410015	1.07958	0.92332	0.333539	0.977633	0.276472	1.07499	1.23177	0.72854	0.032657	0.182936	0.513216	1.08218	1.02954	1.08928	0.217997
04_F	0.4478	0.7032	-0.2814	04_F	0.48745	0.209779	1.33308	0.90503	1.27322	1.18039	1e-35	0.252417	0.770309	0.858978	0.912395	1.0617	1.50579	1.33702	1.10715	1.05674	1.01526	0.995309	0.865331	1.01489	1.46877	1.13204	1.10523	1.04134	0.979534	1.347	1.27988	1.29063	1.32866	1.10657	0.470566	0.287136	1.00758	1.10203	1.08171	1.47824	0.977355	0.691321	1.18555	1.03627	1.5655	1.20252	0.431448	0.638544	1.32858
04_P	0.5328	0.5115	-0.1409	04_P	0.319721	0.196726	1.29927	0.79501	1.22883	1.11631	0.252417	1e-35	0.558521	0.901297	0.789975	0.972007	1.32693	1.14503	0.939945	0.971958	0.839345	0.880529	0.755602	0.99556	1.40947	1.02553	1.06906	0.929131	0.777984	1.28139	1.19668	1.21794	1.22562	1.06822	0.563984	0.280106	0.891646	0.87389	0.996505	1.27129	0.797423	0.567288	1.1262	0.954967	1.52385	0.963733	0.265969	0.59394	1.24408
05_F	0.4765	0.2932	0.3701	05_F	0.297954	0.599487	1.27555	0.805577	1.18555	1.09169	0.770309	0.558521	1e-35	0.878678	1.017	0.963361	0.874877	0.774782	0.987609	1.07168	0.610031	0.949745	0.71935	1.10105	1.29672	0.952332	1.03848	1.17818	0.715032	1.18477	1.07929	1.12237	1.01813	1.21348	0.762458	0.612087	0.86738	0.695824	1.03371	0.784264	0.952684	0.770293	1.11534	0.952287	1.4091	0.703657	0.348866	0.508428	1.12242
05_P	-0.1986	0.8459	0.266	05_P	0.725552	0.729925	1.10153	1.02268	1.04053	1.07318	0.858978	0.901297	0.878678	1e-35	1.4671	1.0845	1.21979	1.23743	1.51488	1.27721	1.03723	1.2473	0.896678	1.01347	1.15709	1.10377	0.852434	1.6503	1.30995	1.09684	1.06654	1.07402	1.03416	1.27317	0.396037	0.681662	1.09638	1.40571	1.18052	1.31115	1.59217	1.13111	1.08858	1.03597	1.16572	1.46496	0.721881	0.403343	1.11418
07_F	0.4909	-0.1725	-0.5339	07_F	0.971153	0.866026	1.18192	0.637555	1.13668	0.955821	0.912395	0.789975	1.017	1.4671	1e-35	0.763941	1.39552	1.08036	0.316484	0.547909	0.798806	0.46808	0.740386	0.86466	1.30461	0.828143	1.08852	0.193628	0.463203	1.16951	1.08709	1.10241	1.18837	0.702668	1.20555	0.848336	0.669169	0.634218	0.690427	1.33181	0.372931	0.340108	0.953371	0.789378	1.46832	0.784324	0.914599	1.2415	1.11145
07_P	-0.1845	-0.1434	-0.1781	07_P	0.955112	0.904447	0.445665	0.188703	0.385844	0.203014	1.0617	0.972007	0.963361	1.0845	0.763941	1e-35	0.928288	0.693164	0.674704	0.286767	0.445473	0.307236	0.254484	0.288927	0.543446	0.115777	0.37844	0.937232	0.61956	0.406514	0.328999	0.339059	0.469717	0.348235	1.02995	0.814893	0.135747	0.792268	0.12513	1.00537	1.02942	0.541175	0.211871	0.05454	0.706792	0.907872	0.905557	1.02792	0.356068
13_F	-0.0808	-0.2739	0.7351	13_F	1.09219	1.29848	1.06169	0.920477	0.980892	0.952565	1.50579	1.32693	0.874877	1.21979	1.39552	0.928288	1e-35	0.336144	1.18263	1.14956	0.614893	1.07018	0.845012	1.15257	0.929501	0.826823	0.950015	1.56201	0.959105	0.887664	0.798782	0.855793	0.622571	1.27295	1.34279	1.24483	0.888247	0.907078	1.02805	0.248644	1.43191	1.17492	0.984619	0.931743	1.01975	0.862985	1.11057	1.09437	0.808366
13_P	0.0546	-0.3531	0.4378	13_P	0.974359	1.13976	0.94286	0.665898	0.860912	0.772938	1.33702	1.14503	0.774782	1.23743	1.08036	0.693164	0.336144	1e-35	0.850402	0.865453	0.34996	0.771906	0.627008	0.957019	0.859307	0.596642	0.838518	1.23956	0.643154	0.77864	0.667427	0.726916	0.555175	1.0192	1.26707	1.08581	0.623827	0.605528	0.770697	0.331369	1.12835	0.895582	0.802289	0.710612	0.997297	0.588963	0.976187	1.06476	0.67899
14_F	0.42	-0.4026	-0.3285	14_F	1.02923	1.00808	1.10758	0.574666	1.05638	0.869702	1.10715	0.939945	0.987609	1.51488	0.316484	0.674704	1.18263	0.850402	1e-35	0.501237	0.641117	0.3898	0.683248	0.86928	1.18299	0.698293	1.03947	0.415579	0.285025	1.05417	0.960082	0.986209	1.03678	0.707395	1.31996	0.977072	0.562909	0.428686	0.61109	1.11063	0.458039	0.446562	0.873178	0.715241	1.35858	0.571735	0.986115	1.28655	0.975697
14_P	-0.0409	-0.2245	-0.4127	14_P	1.04013	0.939955	0.654612	0.300544	0.622652	0.441819	1.05674	0.971958	1.07168	1.27721	0.547909	0.286767	1.14956	0.865453	0.501237	1e-35	0.599021	0.148072	0.435968	0.397921	0.784029	0.370064	0.630404	0.697397	0.564821	0.656979	0.597664	0.598714	0.746877	0.216923	1.14196	0.864825	0.275274	0.768378	0.170937	1.18306	0.867965	0.43589	0.432514	0.320712	0.946881	0.909339	0.980861	1.18071	0.613486
15_F	0.1019	-0.1415	0.1631	15_F	0.723137	0.824707	0.795946	0.350477	0.709616	0.581992	1.01526	0.839345	0.610031	1.03723	0.798806	0.445473	0.614893	0.34996	0.641117	0.599021	1e-35	0.492059	0.307103	0.689069	0.796907	0.392995	0.640491	0.978064	0.416923	0.676897	0.55764	0.607804	0.528458	0.756316	0.989626	0.764549	0.346059	0.487084	0.520759	0.614839	0.900649	0.562092	0.607775	0.456088	0.948763	0.554312	0.703646	0.850321	0.58886
15_P	0.0761	-0.2192	-0.3221	15_P	0.938773	0.869242	0.7341	0.241267	0.686112	0.499912	0.995309	0.880529	0.949745	1.2473	0.46808	0.307236	1.07018	0.771906	0.3898	0.148072	0.492059	1e-35	0.379177	0.480939	0.839995	0.368482	0.668707	0.634594	0.41772	0.706523	0.625738	0.640143	0.743319	0.358454	1.10001	0.80234	0.22716	0.623405	0.233472	1.079	0.751397	0.337453	0.499793	0.343512	1.00795	0.766311	0.883726	1.10794	0.646552
16_F	-0.038	0.024	-0.0545	16_F	0.704413	0.687307	0.604136	0.139863	0.524063	0.390364	0.865331	0.755602	0.71935	0.896678	0.740386	0.254484	0.845012	0.627008	0.683248	0.435968	0.307103	0.379177	1e-35	0.408097	0.682436	0.280037	0.418245	0.931494	0.535397	0.547535	0.451448	0.477859	0.511485	0.531438	0.821483	0.601635	0.205836	0.693473	0.340532	0.896061	0.944981	0.441431	0.408794	0.235178	0.825729	0.801513	0.658608	0.786338	0.495342
16_P	-0.3238	0.047	-0.3449	16_P	1.01745	0.886833	0.377109	0.378793	0.354107	0.262565	1.01489	0.99556	1.10105	1.01347	0.86466	0.288927	1.15257	0.957019	0.86928	0.397921	0.689069	0.480939	0.408097	1e-35	0.569176	0.384068	0.317968	1.02989	0.842127	0.455734	0.445646	0.418323	0.616685	0.290765	0.952255	0.787655	0.394397	1.035	0.302117	1.25177	1.17454	0.628882	0.244721	0.253382	0.686591	1.16088	0.957218	1.03862	0.474559
17_F	-0.6836	-0.1787	0.034	17_F	1.31299	1.2968	0.222283	0.706341	0.219263	0.357453	1.46877	1.40947	1.29672	1.15709	1.30461	0.543446	0.929501	0.859307	1.18299	0.784029	0.796907	0.839995	0.682436	0.569176	1e-35	0.496397	0.373876	1.47124	1.11011	0.138772	0.24508	0.210379	0.324931	0.732405	1.27515	1.19625	0.65512	1.23496	0.620076	1.11712	1.56247	1.07437	0.366512	0.527008	0.179434	1.31076	1.27818	1.25239	0.218478
17_P	-0.201	-0.2023	-0.0798	17_P	0.977285	0.962822	0.447993	0.245053	0.379428	0.21396	1.13204	1.02553	0.952332	1.10377	0.828143	0.115777	0.826823	0.596642	0.698293	0.370064	0.392995	0.368482	0.280037	0.384068	0.496397	1e-35	0.390646	1.00067	0.620825	0.36256	0.264243	0.291366	0.379918	0.448408	1.079	0.875107	0.166615	0.769609	0.213039	0.912605	1.06693	0.610818	0.234671	0.141639	0.667223	0.870774	0.935172	1.04285	0.287405
18_F	-0.4496	0.0982	-0.0574	18_F	0.994077	0.939812	0.267304	0.476741	0.195102	0.250608	1.10523	1.06906	1.03848	0.852434	1.08852	0.37844	0.950015	0.838518	1.03947	0.630404	0.640491	0.668707	0.418245	0.317968	0.373876	0.390646	1e-35	1.26954	0.936961	0.278579	0.278173	0.256665	0.386743	0.581314	0.91419	0.836761	0.480696	1.08913	0.476457	1.09506	1.34508	0.805962	0.262934	0.330473	0.463526	1.18461	0.95111	0.933013	0.319271
18_P	0.6081	-0.2509	-0.6666	18_P	1.13359	1.02188	1.34579	0.823692	1.30661	1.12459	1.04134	0.929131	1.17818	1.6503	0.193628	0.937232	1.56201	1.23956	0.415579	0.697397	0.978064	0.634594	0.931494	1.02989	1.47124	1.00067	1.26954	1e-35	0.612815	1.33882	1.26004	1.27358	1.36641	0.837529	1.37223	1.01411	0.847363	0.751534	0.852646	1.48511	0.371671	0.530823	1.11983	0.965733	1.63661	0.890553	1.07886	1.41747	1.28096
19_F	0.4175	-0.2558	-0.0842	19_F	0.797012	0.845108	1.0597	0.477054	0.989837	0.816596	0.979534	0.777984	0.715032	1.30995	0.463203	0.61956	0.959105	0.643154	0.285025	0.564821	0.416923	0.41772	0.535397	0.842127	1.11011	0.620825	0.936961	0.612815	1e-35	0.97881	0.868553	0.906286	0.900228	0.775161	1.14038	0.816715	0.484816	0.217838	0.609125	0.87309	0.502328	0.394301	0.829661	0.649431	1.27889	0.371217	0.765922	1.05259	0.89313
19_P	-0.5531	-0.1555	-0.0071	19_P	1.19626	1.17538	0.181917	0.567625	0.130402	0.225963	1.347	1.28139	1.18477	1.09684	1.16951	0.406514	0.887664	0.77864	1.05417	0.656979	0.676897	0.706523	0.547535	0.455734	0.138772	0.36256	0.278579	1.33882	0.97881	1e-35	0.120311	0.0733282	0.267832	0.620647	1.18029	1.07585	0.518119	1.11158	0.489694	1.0542	1.42623	0.935843	0.24039	0.389136	0.30527	1.19454	1.15875	1.15963	0.107015
21_F	-0.4389	-0.1659	0.0293	21_F	1.10539	1.10209	0.276309	0.475791	0.200117	0.196497	1.27988	1.19668	1.07929	1.06654	1.08709	0.328999	0.798782	0.667427	0.960082	0.597664	0.55764	0.625738	0.451448	0.445646	0.24508	0.264243	0.278173	1.26004	0.868553	0.120311	1e-35	0.0598336	0.197919	0.599528	1.13177	1.00593	0.422915	0.99519	0.427311	0.950648	1.32643	0.849643	0.223385	0.315705	0.410567	1.07587	1.06994	1.09028	0.0515461
21_P	-0.48	-0.1526	-0.0121	21_P	1.13591	1.11768	0.216846	0.496649	0.144672	0.173855	1.29063	1.21794	1.12237	1.07402	1.10241	0.339059	0.855793	0.726916	0.986209	0.598714	0.607804	0.640143	0.477859	0.418323	0.210379	0.291366	0.256665	1.27358	0.906286	0.0733282	0.0598336	1e-35	0.245698	0.579153	1.13958	1.01949	0.446621	1.04066	0.429187	1.01017	1.35446	0.866859	0.1953	0.322454	0.376074	1.1258	1.09788	1.11438	0.070335
25_F	-0.4223	-0.163	0.2265	25_F	1.08436	1.13546	0.440486	0.570187	0.364218	0.385231	1.32866	1.22562	1.01813	1.03416	1.18837	0.469717	0.622571	0.555175	1.03678	0.746877	0.528458	0.743319	0.511485	0.616685	0.324931	0.379918	0.386743	1.36641	0.900228	0.267832	0.197919	0.245698	1e-35	0.78081	1.14453	1.04494	0.523556	0.989515	0.58084	0.800009	1.38365	0.937028	0.415047	0.45768	0.449117	1.0443	1.06198	1.04762	0.208553
25_P	-0.2114	-0.1515	-0.5252	25_P	1.14605	1.00377	0.559473	0.424957	0.554225	0.410015	1.10657	1.06822	1.21348	1.27317	0.702668	0.348235	1.27295	1.0192	0.707395	0.216923	0.756316	0.358454	0.531438	0.290765	0.732405	0.448408	0.581314	0.837529	0.775161	0.620647	0.599528	0.579153	0.78081	1e-35	1.15471	0.918915	0.411288	0.980868	0.248719	1.33842	1.04922	0.579589	0.386909	0.359445	0.873834	1.12076	1.08169	1.24082	0.612308
28_F	0.0906	0.8338	-0.0043	28_F	0.504246	0.383829	1.169	0.918635	1.10715	1.07958	0.470566	0.563984	0.762458	0.396037	1.20555	1.02995	1.34279	1.26707	1.31996	1.14196	0.989626	1.10001	0.821483	0.952255	1.27515	1.079	0.91419	1.37223	1.14038	1.18029	1.13177	1.13958	1.14453	1.15471	1e-35	0.361995	1.0141	1.25484	1.09547	1.37817	1.31538	0.895383	1.08991	0.987577	1.32788	1.33569	0.47535	0.3408	1.18301
28_P	0.2544	0.5423	-0.143	28_P	0.355391	0.105046	1.07624	0.664638	1.00964	0.92332	0.287136	0.280106	0.612087	0.681662	0.848336	0.814893	1.24483	1.08581	0.977072	0.864825	0.764549	0.80234	0.601635	0.787655	1.19625	0.875107	0.836761	1.01411	0.816715	1.07585	1.00593	1.01949	1.04494	0.918915	0.361995	1e-35	0.766954	0.948464	0.855719	1.24252	0.959062	0.549726	0.932185	0.785201	1.2938	1.04903	0.282883	0.471359	1.05567
29_F	-0.0538	-0.16	-0.1454	29_F	0.876773	0.847481	0.576902	0.103409	0.511001	0.333539	1.00758	0.891646	0.86738	1.09638	0.669169	0.135747	0.888247	0.623827	0.562909	0.275274	0.346059	0.22716	0.205836	0.394397	0.65512	0.166615	0.480696	0.847363	0.484816	0.518119	0.422915	0.446621	0.523556	0.411288	1.0141	0.766954	1e-35	0.658408	0.177237	0.933707	0.908309	0.446373	0.345799	0.167396	0.821231	0.777401	0.829423	0.988986	0.451083
29_P	0.5407	-0.3347	0.0772	29_P	0.848038	0.96349	1.21583	0.659848	1.14081	0.977633	1.10203	0.87389	0.695824	1.40571	0.634218	0.792268	0.907078	0.605528	0.428686	0.768378	0.487084	0.623405	0.693473	1.035	1.23496	0.769609	1.08913	0.751534	0.217838	1.11158	0.99519	1.04066	0.989515	0.980868	1.25484	0.948464	0.658408	1e-35	0.796399	0.770456	0.54908	0.596529	0.994789	0.822283	1.40164	0.15611	0.835705	1.1148	1.01701
30_F	-0.1536	-0.1959	-0.2874	30_F	1.01587	0.941183	0.503273	0.230301	0.461884	0.276472	1.08171	0.996505	1.03371	1.18052	0.690427	0.12513	1.02805	0.770697	0.61109	0.170937	0.520759	0.233472	0.340532	0.302117	0.620076	0.213039	0.476457	0.852646	0.609125	0.489694	0.427311	0.429187	0.58084	0.248719	1.09547	0.855719	0.177237	0.796399	1e-35	1.0905	0.982631	0.512427	0.271733	0.16375	0.784575	0.923142	0.96156	1.11432	0.445103
30_P	0.1635	-0.3181	0.7488	30_P	1.04333	1.27948	1.22331	0.958734	1.13855	1.07499	1.47824	1.27129	0.784264	1.31115	1.33181	1.00537	0.248644	0.331369	1.11063	1.18306	0.614839	1.079	0.896061	1.25177	1.11712	0.912605	1.09506	1.48511	0.87309	1.0542	0.950648	1.01017	0.800009	1.33842	1.37817	1.24252	0.933707	0.770456	1.0905	1e-35	1.30643	1.14452	1.10609	1.01568	1.22742	0.6923	1.06924	1.11017	0.963972
31_F	0.8255	-0.1938	-0.3706	31_F	0.960791	0.941381	1.47072	0.874799	1.41143	1.23177	0.977355	0.797423	0.952684	1.59217	0.372931	1.02942	1.43191	1.12835	0.458039	0.867965	0.900649	0.751397	0.944981	1.17454	1.56247	1.06693	1.34508	0.371671	0.502328	1.42623	1.32643	1.35446	1.38365	1.04922	1.31538	0.959062	0.908309	0.54908	0.982631	1.30643	1e-35	0.567644	1.23672	1.05491	1.72925	0.654865	0.926052	1.28773	1.35297
31_P	0.3047	0.0288	-0.3327	31_P	0.696489	0.590895	0.9523	0.374722	0.893936	0.72854	0.691321	0.567288	0.770293	1.13111	0.340108	0.541175	1.17492	0.895582	0.446562	0.43589	0.562092	0.337453	0.441431	0.628882	1.07437	0.610818	0.805962	0.530823	0.394301	0.935843	0.849643	0.866859	0.937028	0.579589	0.895383	0.549726	0.446373	0.596529	0.512427	1.14452	0.567644	1e-35	0.73161	0.549083	1.22591	0.744508	0.633948	0.925182	0.884682
32_F	-0.3954	-0.1247	-0.1859	32_F	1.09465	1.03047	0.236024	0.387267	0.191042	0.032657	1.18555	1.1262	1.11534	1.08858	0.953371	0.211871	0.984619	0.802289	0.873178	0.432514	0.607775	0.499793	0.408794	0.244721	0.366512	0.234671	0.262934	1.11983	0.829661	0.24039	0.223385	0.1953	0.415047	0.386909	1.08991	0.932185	0.345799	0.994789	0.271733	1.10609	1.23672	0.73161	1e-35	0.193143	0.51922	1.10205	1.04587	1.10856	0.240947
32_P	-0.2054	-0.0936	-0.1705	32_P	0.933552	0.877615	0.419951	0.19416	0.356552	0.182936	1.03627	0.954967	0.952287	1.03597	0.789378	0.05454	0.931743	0.710612	0.715241	0.320712	0.456088	0.343512	0.235178	0.253382	0.527008	0.141639	0.330473	0.965733	0.649431	0.389136	0.315705	0.322454	0.45768	0.359445	0.987577	0.785201	0.167396	0.822283	0.16375	1.01568	1.05491	0.549083	0.193143	1e-35	0.683788	0.936881	0.883446	0.991897	0.348321
33_F	-0.8424	-0.1075	0.0777	33_F	1.415	1.39591	0.320216	0.86295	0.341557	0.513216	1.5655	1.52385	1.4091	1.16572	1.46832	0.706792	1.01975	0.997297	1.35858	0.946881	0.948763	1.00795	0.825729	0.686591	0.179434	0.667223	0.463526	1.63661	1.27889	0.30527	0.410567	0.376074	0.449117	0.873834	1.32788	1.2938	0.821231	1.40164	0.784575	1.22742	1.72925	1.22591	0.51922	0.683788	1e-35	1.47335	1.38251	1.31372	0.391717
33_P	0.5987	-0.382	0.2142	33_P	0.901113	1.05867	1.31369	0.783732	1.23552	1.08218	1.20252	0.963733	0.703657	1.46496	0.784324	0.907872	0.862985	0.588963	0.571735	0.909339	0.554312	0.766311	0.801513	1.16088	1.31076	0.870774	1.18461	0.890553	0.371217	1.19454	1.07587	1.1258	1.0443	1.12076	1.33569	1.04903	0.777401	0.15611	0.923142	0.6923	0.654865	0.744508	1.10205	0.936881	1.47335	1e-35	0.90155	1.1607	1.09588
34_F	0.4044	0.4897	0.091	34_F	0.0773676	0.254013	1.20108	0.738711	1.12118	1.02954	0.431448	0.265969	0.348866	0.721881	0.914599	0.905557	1.11057	0.976187	0.986115	0.980861	0.703646	0.883726	0.658608	0.957218	1.27818	0.935172	0.95111	1.07886	0.765922	1.15875	1.06994	1.09788	1.06198	1.08169	0.47535	0.282883	0.829423	0.835705	0.96156	1.06924	0.926052	0.633948	1.04587	0.883446	1.38251	0.90155	1e-35	0.370179	1.11886
34_P	0.1744	0.6953	0.2956	34_P	0.348409	0.480948	1.20024	0.90616	1.12157	1.08928	0.638544	0.59394	0.508428	0.403343	1.2415	1.02792	1.09437	1.06476	1.28655	1.18071	0.850321	1.10794	0.786338	1.03862	1.25239	1.04285	0.933013	1.41747	1.05259	1.15963	1.09028	1.11438	1.04762	1.24082	0.3408	0.471359	0.988986	1.1148	1.11432	1.11017	1.28773	0.925182	1.10856	0.991897	1.31372	1.1607	0.370179	1e-35	1.14058
36_F	-0.4673	-0.2089	0.0281	36_F	1.15402	1.15163	0.274836	0.51123	0.211751	0.217997	1.32858	1.24408	1.12242	1.11418	1.11145	0.356068	0.808366	0.67899	0.975697	0.613486	0.58886	0.646552	0.495342	0.474559	0.218478	0.287405	0.319271	1.28096	0.89313	0.107015	0.0515461	0.070335	0.208553	0.612308	1.18301	1.05567	0.451083	1.01701	0.445103	0.963972	1.35297	0.884682	0.240947	0.348321	0.391717	1.09588	1.11886	1.14058	1e-35
36_P	-0.345	-0.2853	0.0046	36_P	1.1172	1.12298	0.383063	0.429901	0.32198	0.230728	1.29902	1.1944	1.06916	1.1702	1.00072	0.281558	0.776892	0.593245	0.842579	0.519916	0.4955	0.537054	0.439782	0.482725	0.356199	0.186409	0.402315	1.16623	0.76822	0.245541	0.153895	0.190035	0.2649	0.56253	1.20092	1.03247	0.35071	0.890042	0.360403	0.901932	1.23256	0.79658	0.25421	0.294783	0.533257	0.971521	1.08152	1.14718	0.146104
37_F	0.4387	0.6502	-0.1873	37_F	0.379778	0.120372	1.28948	0.847283	1.22433	1.1307	0.108382	0.173912	0.663003	0.806183	0.894255	1.00909	1.40523	1.24294	1.06239	1.0227	0.92898	0.951581	0.798126	0.984934	1.41266	1.07123	1.05388	1.0346	0.912094	1.29046	1.21783	1.23256	1.25453	1.08606	0.434018	0.218109	0.949071	1.02489	1.03765	1.37464	0.946335	0.652101	1.13851	0.984066	1.5118	1.11904	0.323091	0.552341	1.267
37_P	-0.1053	0.9754	0.0572	37_P	0.723623	0.631065	1.19389	1.06726	1.14064	1.15365	0.703322	0.813399	0.949629	0.262817	1.42216	1.14602	1.42158	1.39116	1.52433	1.29024	1.14088	1.26643	0.960296	1.03506	1.29109	1.1895	0.949292	1.59268	1.34505	1.21803	1.18938	1.19062	1.19378	1.27293	0.249419	0.597528	1.15448	1.46085	1.22189	1.49121	1.55449	1.1028	1.16339	1.09756	1.31012	1.53714	0.70487	0.462085	1.23873
39_F	0.3536	0.641	-0.0413	39_F	0.25863	0.112017	1.2197	0.805055	1.14877	1.0692	0.265312	0.242493	0.552557	0.664336	0.960879	0.961015	1.27614	1.14332	1.08443	1.02111	0.847017	0.946467	0.730899	0.950726	1.32415	1.01006	0.969547	1.1186	0.900097	1.20735	1.13319	1.15132	1.14898	1.08694	0.328192	0.172989	0.904662	1.00052	1.00907	1.25709	1.01391	0.679775	1.08084	0.9321	1.41592	1.08254	0.207306	0.385438	1.18365
39_P	-0.1853	0.9697	0.0914	39_P	0.777549	0.698323	1.16292	1.079	1.11166	1.13829	0.781548	0.882937	0.986562	0.214449	1.46727	1.14526	1.40421	1.38829	1.55753	1.30425	1.14995	1.28561	0.968159	1.03001	1.25316	1.18454	0.922772	1.64131	1.37697	1.18788	1.16523	1.16495	1.16509	1.27983	0.322099	0.656468	1.16172	1.4929	1.22602	1.48737	1.609	1.14248	1.14837	1.09526	1.26188	1.56743	0.760359	0.496364	1.21352
40_F	-0.2137	1.0718	0.0381	40_F	0.869924	0.765669	1.2366	1.17166	1.19142	1.22287	0.821905	0.950389	1.09216	0.321243	1.54011	1.23463	1.52131	1.50402	1.64616	1.38328	1.25989	1.37128	1.06646	1.09956	1.33588	1.27961	1.00631	1.70924	1.47509	1.27417	1.25805	1.25403	1.26639	1.34676	0.388639	0.729579	1.25562	1.59652	1.3102	1.60599	1.68781	1.22233	1.23077	1.18395	1.337	1.67468	0.850698	0.598899	1.3056
40_P	0.4534	0.2723	0.3379	40_P	0.289938	0.578809	1.23644	0.76108	1.14672	1.05012	0.754479	0.541083	0.0448025	0.871373	0.979433	0.919771	0.861088	0.748429	0.949049	1.02691	0.570384	0.905278	0.676095	1.05878	1.26037	0.909922	1.00099	1.14311	0.677013	1.14677	1.04089	1.08364	0.984249	1.16898	0.751004	0.586315	0.823234	0.666359	0.989273	0.775534	0.92611	0.728772	1.07352	0.909049	1.37515	0.681559	0.332601	0.508487	1.08407
43_F	-0.7905	-0.1812	0.0687	43_F	1.4034	1.38966	0.297095	0.817778	0.313633	0.46647	1.56145	1.50827	1.38607	1.20175	1.41605	0.65542	0.977935	0.938072	1.2931	0.89192	0.898257	0.951401	0.789646	0.66404	0.112419	0.608283	0.458452	1.58165	1.21992	0.250529	0.354131	0.322113	0.401003	0.830034	1.34607	1.28844	0.767473	1.34005	0.729839	1.17957	1.67469	1.18519	0.47341	0.638148	0.0905886	1.41116	1.37054	1.32317	0.326916
43_P	-0.1261	-0.1878	-0.3065	43_P	1.00342	0.923226	0.532469	0.222083	0.491488	0.307001	1.06013	0.974984	1.02581	1.18387	0.657749	0.14788	1.04613	0.783555	0.587238	0.141012	0.524072	0.205217	0.340771	0.309339	0.653322	0.239193	0.498497	0.820185	0.591221	0.522506	0.45944	0.461688	0.610277	0.237536	1.08718	0.83938	0.178755	0.783216	0.0344481	1.10205	0.953775	0.482898	0.301742	0.183461	0.816789	0.913333	0.947862	1.11027	0.478351
44_F	0.3823	-0.2189	0.2838	44_F	0.732741	0.908407	1.10766	0.613416	1.02245	0.889165	1.08352	0.858198	0.527795	1.21308	0.826184	0.735061	0.648967	0.386151	0.640374	0.81501	0.314934	0.678876	0.591692	0.982112	1.09552	0.687546	0.953429	0.977379	0.371517	0.981639	0.861364	0.914064	0.808572	1.00574	1.12972	0.88201	0.614707	0.284928	0.783573	0.523392	0.790756	0.668917	0.913405	0.753313	1.24691	0.279776	0.734693	0.937616	0.887301
44_P	0.3336	-0.2696	0.0494	44_P	0.785975	0.87501	0.998533	0.45338	0.922523	0.761418	1.03383	0.828258	0.663335	1.25479	0.611891	0.57975	0.801206	0.485456	0.409832	0.596507	0.288136	0.454817	0.484853	0.829387	1.02137	0.554093	0.871829	0.767044	0.158362	0.895795	0.779688	0.824267	0.783654	0.800711	1.13112	0.838136	0.447256	0.218864	0.59685	0.72142	0.651238	0.485673	0.779617	0.608155	1.18746	0.331769	0.763728	1.00846	0.803479
45_F	-0.3565	0.0912	-0.0354	45_F	0.910636	0.868259	0.339286	0.396831	0.257068	0.247386	1.04017	0.989261	0.948221	0.827856	1.0179	0.324013	0.896091	0.768325	0.965763	0.584487	0.551074	0.604721	0.326072	0.314346	0.429717	0.335103	0.0959198	1.20246	0.849627	0.316723	0.277626	0.274287	0.370862	0.565563	0.867364	0.766986	0.408447	0.999519	0.432549	1.02611	1.26123	0.727645	0.266038	0.274289	0.537003	1.09482	0.868187	0.869685	0.326143
45_P	-0.7782	0.1188	0.1697	45_P	1.26925	1.25919	0.409963	0.852465	0.393842	0.564379	1.43111	1.40335	1.28252	0.934818	1.48004	0.736338	0.979927	0.994044	1.39848	1.00033	0.91781	1.04208	0.779197	0.690252	0.340397	0.706056	0.399971	1.66069	1.27847	0.396445	0.46464	0.442304	0.457496	0.936595	1.13856	1.15905	0.837719	1.39775	0.835525	1.18871	1.7209	1.19715	0.576437	0.699249	0.252581	1.46582	1.24189	1.12056	0.473388
46_F	-0.2898	-0.1194	-0.2191	46_F	1.02582	0.95515	0.34347	0.287719	0.295383	0.115063	1.10662	1.03963	1.051	1.08418	0.843452	0.115521	0.988963	0.777653	0.772002	0.332383	0.547717	0.393004	0.333257	0.211354	0.471863	0.184831	0.314695	1.01182	0.732855	0.339962	0.293421	0.283068	0.466922	0.317607	1.04854	0.860112	0.250551	0.907677	0.170492	1.0871	1.128	0.623136	0.110823	0.100752	0.627374	1.02281	0.974207	1.06964	0.317213
46_P	-0.24	-0.0816	-0.0571	46_P	0.916537	0.89401	0.397171	0.248784	0.316375	0.18001	1.06737	0.977758	0.91452	0.983038	0.877391	0.146767	0.830605	0.636732	0.782495	0.431871	0.411062	0.434831	0.227952	0.326174	0.463151	0.128859	0.276153	1.05803	0.680725	0.325565	0.232664	0.254295	0.346826	0.474154	0.974701	0.800663	0.220486	0.831618	0.271233	0.931783	1.11632	0.620356	0.206389	0.119167	0.617841	0.931269	0.873824	0.948524	0.274098
47_F	0.447	-0.2541	0.3333	47_F	0.775345	0.967256	1.191	0.700005	1.10597	0.973629	1.13766	0.904638	0.549328	1.27723	0.872136	0.820108	0.663632	0.41797	0.678793	0.891874	0.400925	0.753879	0.680407	1.06993	1.17197	0.77022	1.03954	1.0128	0.418544	1.06103	0.940752	0.994451	0.880561	1.08676	1.19353	0.947739	0.699149	0.284365	0.865665	0.507059	0.801482	0.737453	0.997973	0.839762	1.32264	0.231422	0.78343	0.98848	0.964953
47_P	0.1361	-0.1256	0.1277	47_P	0.694635	0.788286	0.813235	0.32893	0.728021	0.592976	0.975412	0.797128	0.591628	1.0368	0.752195	0.443413	0.661795	0.393142	0.604522	0.577185	0.0517263	0.463337	0.293066	0.681652	0.826745	0.403207	0.653753	0.932414	0.375552	0.702895	0.584749	0.632339	0.568305	0.740071	0.969506	0.730318	0.334408	0.45823	0.511054	0.650824	0.853362	0.514037	0.617121	0.454499	0.979944	0.535931	0.672254	0.838769	0.617212
48_F	-0.2856	0.9425	0.1007	48_F	0.844096	0.767672	1.10575	1.07605	1.05844	1.10073	0.860895	0.955986	1.0368	0.210297	1.49963	1.12567	1.3871	1.38129	1.57841	1.29821	1.15287	1.28807	0.963865	1.00097	1.19161	1.16203	0.874491	1.6768	1.40159	1.13525	1.12123	1.11793	1.121	1.26257	0.405422	0.714947	1.15317	1.52137	1.20996	1.48689	1.65766	1.17096	1.11046	1.074	1.18872	1.59661	0.825362	0.557399	1.16791
48_P	0.8249	0.1441	0.0853	48_P	0.537168	0.685202	1.48628	0.89821	1.40536	1.2624	0.767637	0.521029	0.474051	1.25408	0.771492	1.08209	1.19049	0.982256	0.796276	1.06465	0.781249	0.926641	0.882363	1.23045	1.5435	1.09532	1.28329	0.876573	0.595504	1.41322	1.30247	1.34175	1.29219	1.23855	1.01139	0.732226	0.958026	0.556852	1.10089	1.04466	0.567469	0.677219	1.27865	1.08787	1.68619	0.586995	0.544327	0.878179	1.34077
50_F	0.513	-0.3005	0.2837	50_F	0.815682	0.994185	1.23967	0.726926	1.15723	1.01512	1.15369	0.916527	0.601063	1.34942	0.827854	0.851144	0.74637	0.486461	0.627584	0.893059	0.456978	0.751322	0.723381	1.10278	1.22843	0.8072	1.09632	0.956334	0.382712	1.11452	0.99446	1.04662	0.947082	1.09603	1.24419	0.979418	0.724658	0.211138	0.883998	0.582046	0.732905	0.72923	1.0376	0.874759	1.38448	0.137175	0.820575	1.05186	1.01721
50_P	0.8499	-0.4851	0.2649	50_P	1.07689	1.24779	1.58647	1.04939	1.50967	1.35368	1.36828	1.1218	0.869624	1.69438	0.929882	1.17601	1.06391	0.824512	0.73739	1.14916	0.829414	1.007	1.07218	1.42568	1.58076	1.14157	1.46042	0.990459	0.601181	1.46664	1.34848	1.39854	1.3129	1.36452	1.54548	1.25561	1.04437	0.391735	1.18139	0.856267	0.699508	0.958364	1.37254	1.20686	1.74399	0.276227	1.08579	1.36036	1.36652
52_F	-0.7015	-0.1903	0.2612	52_F	1.3317	1.36629	0.438158	0.815659	0.409334	0.526922	1.55359	1.47571	1.27801	1.1518	1.43329	0.680054	0.785391	0.793334	1.28475	0.9443	0.810837	0.97249	0.765391	0.752546	0.228199	0.605743	0.498188	1.60609	1.17292	0.308575	0.351186	0.353803	0.28267	0.927431	1.32163	1.27036	0.765348	1.26403	0.775363	1.00116	1.65255	1.18876	0.545801	0.664704	0.245725	1.3151	1.30934	1.24606	0.330955
52_P	0.0417	-0.2237	-0.0603	52_P	0.853445	0.868986	0.688772	0.194329	0.61752	0.44859	1.03583	0.887803	0.800925	1.14379	0.654751	0.267379	0.806342	0.514795	0.497039	0.361952	0.245537	0.264089	0.260271	0.536531	0.732788	0.244421	0.58737	0.83015	0.377925	0.601056	0.492286	0.528724	0.548849	0.534233	1.06011	0.799273	0.142898	0.529366	0.300814	0.823644	0.843518	0.455112	0.465438	0.300214	0.902319	0.640826	0.814483	0.994402	0.516831
55_F	-0.2504	-0.1799	0.2111	55_F	0.965798	1.03333	0.533685	0.453971	0.448452	0.394091	1.22878	1.10242	0.881753	1.02857	1.051	0.396424	0.558727	0.417632	0.888932	0.65955	0.357623	0.626458	0.396525	0.604985	0.468004	0.295914	0.434871	1.22981	0.734202	0.373944	0.262258	0.321372	0.173414	0.737879	1.09099	0.949622	0.407602	0.817148	0.508064	0.692484	1.22316	0.804618	0.426241	0.393816	0.611147	0.872826	0.94422	0.976509	0.285264
55_P	-0.2994	-0.2068	-0.1782	55_P	1.07377	1.02494	0.350596	0.319311	0.302849	0.121834	1.18197	1.09996	1.07362	1.14702	0.867337	0.131231	0.941491	0.72538	0.760568	0.349465	0.53084	0.40232	0.37	0.304629	0.439805	0.139231	0.360801	1.03152	0.724695	0.310275	0.253356	0.251283	0.425212	0.362231	1.12481	0.932247	0.252161	0.887331	0.182486	1.04211	1.14131	0.666569	0.126553	0.147341	0.608436	0.995619	1.02612	1.12373	0.265997
56_F	0.4542	-0.2477	-0.3332	56_F	0.898928	0.861419	1.10659	0.531325	1.05089	0.867069	0.952331	0.78711	0.887525	1.40753	0.217445	0.665486	1.19506	0.874775	0.1587	0.501979	0.617825	0.379335	0.627499	0.832027	1.19758	0.70396	1.00626	0.367221	0.25182	1.06278	0.967329	0.992411	1.0434	0.699387	1.18744	0.836777	0.548657	0.428345	0.61172	1.12258	0.377051	0.314329	0.871003	0.696628	1.36736	0.581862	0.852165	1.16744	0.990558
56_P	-0.6174	-0.0094	0.0351	56_P	1.17411	1.14877	0.202712	0.636725	0.157016	0.320992	1.32008	1.27486	1.18339	0.979922	1.25646	0.500812	0.920815	0.8555	1.16748	0.761016	0.742447	0.807806	0.587238	0.48351	0.181786	0.473077	0.219752	1.43267	1.0705	0.165108	0.237462	0.203992	0.313514	0.706374	1.10173	1.04696	0.61066	1.20366	0.594894	1.10203	1.51015	0.993481	0.333795	0.468087	0.249125	1.28445	1.13855	1.09152	0.249758
58_F	0.0812	-0.2044	0.3915	58_F	0.821252	0.987923	0.901907	0.575565	0.813814	0.722929	1.18782	0.999953	0.635866	1.09415	1.01254	0.631476	0.38618	0.157997	0.820042	0.813665	0.237806	0.713772	0.515064	0.877218	0.844622	0.549331	0.758173	1.18295	0.584833	0.750739	0.634961	0.693197	0.531461	0.963718	1.11113	0.934478	0.55539	0.571754	0.718407	0.383881	1.06531	0.792969	0.752921	0.640516	0.980253	0.575138	0.822516	0.909584	0.657976
58_P	-0.2422	-0.1541	-0.0594	58_P	0.966382	0.950467	0.401677	0.264561	0.326528	0.174659	1.12265	1.02484	0.949251	1.05251	0.873456	0.132414	0.819532	0.61229	0.756753	0.412673	0.409963	0.417809	0.271	0.358622	0.451844	0.0666096	0.32661	1.04932	0.667954	0.315271	0.216097	0.242463	0.338015	0.466824	1.04391	0.859403	0.207184	0.81499	0.248156	0.919062	1.11284	0.638157	0.20084	0.131749	0.61742	0.913186	0.924765	1.01048	0.247647
60_F	-0.6843	-0.0139	0.0407	60_F	1.23556	1.2087	0.214809	0.701713	0.196983	0.373808	1.37827	1.33804	1.2451	1.01288	1.31773	0.560753	0.956035	0.90483	1.22755	0.814793	0.805837	0.867168	0.654372	0.531372	0.164938	0.532535	0.277982	1.49223	1.13494	0.198869	0.288886	0.252515	0.354114	0.750207	1.14939	1.10646	0.673431	1.26683	0.649935	1.14573	1.57513	1.058	0.38352	0.529436	0.187418	1.34599	1.20059	1.1425	0.292015
60_P	0.3793	-0.1832	0.1056	60_P	0.689543	0.806385	1.04276	0.488047	0.962044	0.809867	0.969622	0.752949	0.553503	1.19111	0.649253	0.632408	0.784977	0.494624	0.488094	0.668512	0.286349	0.525503	0.492649	0.866194	1.06532	0.609496	0.89041	0.808224	0.20677	0.939595	0.821932	0.867863	0.810918	0.864777	1.06288	0.777015	0.501114	0.223179	0.662263	0.691718	0.652666	0.492561	0.829792	0.652789	1.22436	0.31536	0.673526	0.921871	0.850528
61_F	-0.5555	-0.133	0.3793	61_F	1.19376	1.26636	0.54194	0.76678	0.482642	0.560769	1.46368	1.36762	1.11658	1.04807	1.38941	0.66966	0.609743	0.651221	1.23502	0.94892	0.692091	0.947793	0.69328	0.781377	0.37112	0.584162	0.505347	1.569	1.08473	0.387062	0.370376	0.399097	0.204915	0.967919	1.22446	1.17676	0.726459	1.15482	0.781005	0.829309	1.57264	1.1283	0.587496	0.652995	0.417042	1.19224	1.17995	1.10718	0.369975
61_P	0.4203	-0.3311	0.1284	61_P	0.833869	0.956573	1.11206	0.584213	1.03497	0.878742	1.11286	0.891714	0.671809	1.3369	0.684675	0.703531	0.78896	0.47953	0.462461	0.718928	0.372197	0.57788	0.607937	0.959509	1.11836	0.667795	0.987697	0.820808	0.225559	0.99835	0.880532	0.928516	0.864787	0.92655	1.21791	0.92952	0.573596	0.130884	0.721478	0.671574	0.657297	0.596242	0.898194	0.732972	1.28335	0.204399	0.821805	1.06861	0.901569
63_F	0.7818	-0.5615	0.2926	63_F	1.12717	1.29847	1.55329	1.04039	1.47784	1.32438	1.42846	1.18375	0.910893	1.71542	0.958669	1.1533	1.01124	0.770281	0.736148	1.13484	0.809589	0.996513	1.06553	1.41387	1.53649	1.11068	1.44016	1.02309	0.60675	1.4271	1.30994	1.36095	1.27005	1.35031	1.58517	1.29857	1.02532	0.394923	1.15976	0.806013	0.75957	0.983402	1.34371	1.18657	1.70009	0.268128	1.13494	1.39588	1.32459
63_P	0.1612	-0.2374	-0.3396	63_P	0.933724	0.867466	0.822824	0.304388	0.77413	0.587912	0.985015	0.859313	0.940545	1.29219	0.388158	0.392972	1.10221	0.793159	0.307232	0.215301	0.51519	0.0887665	0.435078	0.56226	0.925586	0.447121	0.751892	0.553923	0.362295	0.792142	0.708039	0.724972	0.81638	0.425038	1.12467	0.809487	0.299882	0.572023	0.321786	1.09139	0.666451	0.302494	0.588327	0.428566	1.09464	0.720423	0.879339	1.12853	0.728717
66_F	-0.0404	-0.2631	-0.3014	66_F	1.01162	0.947832	0.630072	0.244873	0.587021	0.399797	1.08281	0.976895	1.01369	1.25573	0.586979	0.224267	1.03734	0.750694	0.481833	0.117805	0.500795	0.126206	0.378671	0.422339	0.73029	0.280349	0.597928	0.74436	0.506854	0.600876	0.52689	0.537729	0.659201	0.302955	1.14395	0.872162	0.187471	0.697239	0.132386	1.07122	0.871421	0.453078	0.398145	0.270352	0.900629	0.829716	0.958401	1.14938	0.541988
66_P	0.2906	-0.3724	0.3949	66_P	0.91576	1.09735	1.10783	0.70243	1.02526	0.906056	1.28024	1.06161	0.691518	1.31916	0.970953	0.778775	0.513202	0.240643	0.735502	0.885429	0.377695	0.763917	0.683426	1.04914	1.0568	0.704233	0.986882	1.11461	0.509152	0.959416	0.84171	0.898769	0.761862	1.07116	1.28619	1.06176	0.675018	0.406084	0.833066	0.379932	0.950792	0.831001	0.932352	0.802136	1.20602	0.35731	0.921153	1.07858	0.857722
[truncated: 37 more columns]

## Sheet: CHEMICAL DISTANCES RIGHT
First three PCA scores for all subjects and Euclidean distances among subjects calculated from the PCA scores. Based on right axilla samples relative peak volumes. F - father, P - partner
		PCA scores			Euclidean distances
	PC 1 (18%)	PC 2 (14%)	PC 3 (6%)		01_F	01_P	02_F	02_P	03_F	03_P	04_F	04_P	05_F	05_P	07_F	07_P	13_F	13_P	14_F	14_P	15_F	15_P	16_F	16_P	17_F	17_P	18_F	18_P	19_F	19_P	21_F	21_P	25_F	25_P	28_F	28_P	29_F	29_P	30_F	30_P	31_F	31_P	32_F	32_P	33_F	33_P	34_F	34_P	36_F
01_F	-0.3613	0.5389	0.023	01_F	1e-35	0.311952	1.14802	0.963277	1.20215	1.05494	0.135489	0.0483452	0.205848	0.77885	0.716634	0.880084	0.99336	0.736829	0.770566	0.999104	0.929669	0.936226	0.927445	0.648696	0.967012	1.02402	0.842741	0.687992	0.712774	0.780822	1.01124	0.891152	1.1317	1.0026	0.660421	0.191521	0.755175	1.02365	1.09657	0.88821	0.958817	0.997952	1.12598	1.08575	1.16071	0.743321	0.283479	0.177349	1.46628
01_P	-0.3661	0.4436	0.32	01_P	0.311952	1e-35	1.11295	0.785875	1.21435	1.04022	0.430158	0.34257	0.437306	0.892543	0.594736	1.0123	0.849749	0.660554	0.68883	0.784278	0.878292	0.901856	0.873696	0.457844	0.955151	1.01826	0.9157	0.688292	0.7021	0.778248	1.01937	0.851724	1.10733	0.903807	0.744751	0.261755	0.784526	1.05527	0.880729	0.90541	0.782746	0.744374	1.08519	1.10462	1.18372	0.639104	0.391703	0.485344	1.49291
02_F	0.5614	-0.1375	0.1182	02_F	1.14802	1.11295	1e-35	1.3588	0.233704	0.431499	1.17467	1.12085	1.26473	1.17512	0.892333	0.882786	0.517958	0.792945	0.851171	0.78094	0.395191	0.460143	0.438206	0.762438	0.243302	0.20866	0.429719	1.14762	1.04899	0.756185	0.283567	0.447942	0.0921428	0.429774	1.17221	1.27166	0.920398	1.47602	0.717332	0.586483	1.24451	1.0067	0.2721	0.222749	0.255352	1.14759	0.991394	1.16448	0.436758
02_P	-0.7514	-0.2275	0.457	02_P	0.963277	0.785875	1.3588	1e-35	1.41701	1.09005	1.09554	0.971875	1.1479	1.65135	0.48867	1.11565	0.886909	0.612716	0.560245	0.711386	0.988712	0.968753	0.953081	0.698572	1.17709	1.23538	1.28752	0.526652	0.548769	0.766511	1.21329	0.955011	1.32077	0.951962	1.51723	0.856661	0.723425	0.681219	0.892001	0.967912	0.132391	0.549799	1.18331	1.3463	1.4011	0.313139	1.12319	1.10174	1.75107
03_F	0.5535	-0.232	-0.0954	03_F	1.20215	1.21435	0.233704	1.41701	1e-35	0.361943	1.21974	1.16786	1.32536	1.26689	0.941636	0.758464	0.64256	0.819867	0.87315	0.91736	0.431447	0.452212	0.465014	0.88388	0.266231	0.201244	0.400831	1.13868	1.03772	0.728095	0.217679	0.46317	0.169029	0.513755	1.27807	1.33588	0.878395	1.42713	0.887147	0.52151	1.30089	1.13738	0.269099	0.11819	0.0551559	1.17863	1.07489	1.19306	0.339641
03_P	0.2144	-0.3432	-0.035	03_P	1.05494	1.04022	0.431499	1.09005	0.361943	1e-35	1.10499	1.02269	1.21939	1.3423	0.634593	0.561837	0.445027	0.505555	0.546202	0.693038	0.196671	0.145301	0.193397	0.67995	0.253831	0.262111	0.47082	0.824165	0.716496	0.407692	0.210676	0.194596	0.346586	0.296446	1.31179	1.15276	0.564168	1.09477	0.729835	0.219744	0.971089	0.887245	0.187399	0.334608	0.351916	0.855643	1.0056	1.07463	0.696118
04_F	-0.3098	0.6291	-0.064	04_F	0.135489	0.430158	1.17467	1.09554	1.21974	1.10499	1e-35	0.127004	0.134479	0.691124	0.829728	0.899853	1.07645	0.834891	0.87308	1.10507	0.989321	0.99644	0.991262	0.751284	1.0009	1.0534	0.839853	0.789191	0.811513	0.856052	1.04086	0.951765	1.16047	1.07461	0.588357	0.302472	0.832024	1.1105	1.19138	0.940783	1.08888	1.11917	1.17278	1.10205	1.17546	0.865556	0.265905	0.0870303	1.46363
04_P	-0.3394	0.5163	-0.0137	04_P	0.0483452	0.34257	1.12085	0.971875	1.16786	1.02269	0.127004	1e-35	0.226737	0.775959	0.706474	0.836337	0.979378	0.718091	0.753396	0.997236	0.902994	0.907183	0.900989	0.646823	0.936254	0.992319	0.805422	0.672336	0.693555	0.751415	0.977444	0.863156	1.10228	0.981783	0.665746	0.230785	0.725696	1.00822	1.09463	0.853655	0.962632	1.00526	1.09696	1.05146	1.12542	0.73959	0.280896	0.147822	1.43179
05_F	-0.3395	0.7425	0.0019	05_F	0.205848	0.437306	1.26473	1.1479	1.32536	1.21939	0.134479	0.226737	1e-35	0.659648	0.91723	1.03409	1.1578	0.935914	0.972749	1.1666	1.09289	1.10653	1.09613	0.813274	1.10405	1.15715	0.946194	0.887867	0.916405	0.973764	1.15037	1.05916	1.25762	1.16852	0.539719	0.307309	0.95175	1.20527	1.24674	1.06212	1.15137	1.1655	1.27695	1.20724	1.28268	0.944165	0.294361	0.212152	1.56046
05_P	0.2688	0.9967	0.024	05_P	0.77885	0.892543	1.17512	1.65135	1.26689	1.3423	0.691124	0.775959	0.659648	1e-35	1.30247	1.30529	1.29752	1.28047	1.34076	1.38267	1.21949	1.26632	1.24641	1.07553	1.12783	1.15727	0.922175	1.39575	1.38042	1.29216	1.18207	1.21503	1.20625	1.2958	0.171624	0.924087	1.34422	1.75465	1.37488	1.27213	1.6188	1.46228	1.32145	1.16332	1.23147	1.43723	0.537336	0.729565	1.36827
07_F	-0.3229	-0.1438	0.2375	07_F	0.716634	0.594736	0.892333	0.48867	0.941636	0.634593	0.829728	0.706474	0.91723	1.30247	1e-35	0.723135	0.490379	0.139398	0.123599	0.452817	0.518357	0.501185	0.485804	0.3304	0.695242	0.755029	0.802198	0.367535	0.297293	0.328358	0.732224	0.479316	0.850274	0.516996	1.19804	0.710167	0.367798	0.724688	0.620432	0.507796	0.393344	0.467963	0.728225	0.863332	0.92172	0.261842	0.797602	0.823237	1.27524
07_P	-0.1108	-0.1572	-0.4537	07_P	0.880084	1.0123	0.882786	1.11565	0.758464	0.561837	0.899853	0.836337	1.03409	1.30529	0.723135	1e-35	0.882429	0.604654	0.62758	1.04998	0.634036	0.560481	0.618811	0.876407	0.65475	0.675422	0.587691	0.633822	0.572716	0.41699	0.602663	0.575737	0.804748	0.77048	1.2814	0.988674	0.393315	0.811283	1.15114	0.382242	1.03849	1.16264	0.729255	0.69237	0.713701	0.81107	0.936817	0.832693	1.03788
13_F	0.1329	-0.2406	0.3903	13_F	0.99336	0.849749	0.517958	0.886909	0.64256	0.445027	1.07645	0.979378	1.1578	1.29752	0.490379	0.882429	1e-35	0.446402	0.485028	0.275527	0.284778	0.346717	0.282313	0.39646	0.435911	0.479596	0.674827	0.832885	0.737815	0.532854	0.501661	0.321602	0.502384	0.150027	1.22485	1.04391	0.690395	1.16744	0.287035	0.510911	0.768673	0.501869	0.39955	0.597068	0.648297	0.74504	0.926443	1.07967	0.935978
13_P	-0.2303	-0.1769	0.1387	13_P	0.736829	0.660554	0.792945	0.612716	0.819867	0.505555	0.834891	0.718091	0.935914	1.28047	0.139398	0.604654	0.446402	1e-35	0.0692065	0.48942	0.407436	0.376603	0.372321	0.368464	0.582092	0.639328	0.692099	0.389172	0.292465	0.196857	0.608815	0.359936	0.742187	0.43376	1.19186	0.763779	0.281624	0.738593	0.63708	0.368696	0.511294	0.561162	0.615277	0.743292	0.798076	0.360098	0.795995	0.81789	1.15665
14_F	-0.2855	-0.218	0.146	14_F	0.770566	0.68883	0.851171	0.560245	0.87315	0.546202	0.87308	0.753396	0.972749	1.34076	0.123599	0.62758	0.485028	0.0692065	1e-35	0.503552	0.461143	0.424532	0.423169	0.41093	0.641872	0.697343	0.756665	0.354523	0.257425	0.222264	0.66455	0.414249	0.798484	0.477617	1.24876	0.783707	0.275141	0.687967	0.662199	0.409497	0.4568	0.554427	0.661951	0.800924	0.852546	0.311524	0.847644	0.855324	1.21139
14_P	-0.0531	-0.2218	0.5927	14_P	0.999104	0.784278	0.78094	0.711386	0.91736	0.693038	1.10507	0.997236	1.1666	1.38267	0.452817	1.04998	0.275527	0.48942	0.503552	1e-35	0.533932	0.577755	0.520372	0.354965	0.697883	0.747419	0.902996	0.818212	0.744207	0.649339	0.765896	0.55084	0.774072	0.415189	1.28035	0.99983	0.768192	1.14554	0.18626	0.708891	0.604393	0.234422	0.672681	0.866128	0.921208	0.660238	0.969383	1.12234	1.20656
15_F	0.1742	-0.2161	0.1096	15_F	0.929669	0.878292	0.395191	0.988712	0.431447	0.196671	0.989321	0.902994	1.09289	1.21949	0.518357	0.634036	0.284778	0.407436	0.461143	0.533932	1e-35	0.0936917	0.0454418	0.496329	0.205075	0.25372	0.441053	0.770201	0.666872	0.379995	0.243617	0.0659001	0.338532	0.153654	1.17288	1.01963	0.551097	1.093	0.568179	0.263608	0.873135	0.732188	0.219836	0.368735	0.420797	0.766237	0.864784	0.972138	0.762383
15_P	0.1244	-0.2612	0.0443	15_P	0.936226	0.901856	0.460143	0.968753	0.452212	0.145301	0.99644	0.907183	1.10653	1.26632	0.501185	0.560481	0.346717	0.376603	0.424532	0.577755	0.0936917	1e-35	0.0681244	0.536938	0.252171	0.29289	0.46022	0.720251	0.613986	0.313692	0.257368	0.0589154	0.391113	0.213924	1.22036	1.02405	0.483255	1.02414	0.632733	0.180801	0.852735	0.762366	0.249225	0.394651	0.437272	0.734387	0.895232	0.972214	0.790791
16_F	0.1354	-0.2397	0.108	16_F	0.927445	0.873696	0.438206	0.953081	0.465014	0.193397	0.991262	0.900989	1.09613	1.24641	0.485804	0.618811	0.282313	0.372321	0.423169	0.520372	0.0454418	0.0681244	1e-35	0.489634	0.246298	0.293215	0.471832	0.735831	0.631042	0.345056	0.275393	0.0506693	0.379281	0.15335	1.196	1.01141	0.516827	1.05357	0.567913	0.241733	0.836449	0.712553	0.24523	0.405412	0.454074	0.73077	0.876261	0.972876	0.798657
16_P	-0.12	0.0647	0.3941	16_P	0.648696	0.457844	0.762438	0.698572	0.88388	0.67995	0.751284	0.646823	0.813274	1.07553	0.3304	0.876407	0.39646	0.368464	0.41093	0.354965	0.496329	0.536938	0.489634	1e-35	0.620962	0.684412	0.715582	0.645695	0.58984	0.52407	0.694648	0.487621	0.753501	0.473691	0.965429	0.669287	0.618276	1.03358	0.453394	0.61195	0.621375	0.419853	0.696476	0.794536	0.867672	0.542523	0.621438	0.772028	1.1829
17_F	0.338	-0.129	0.0222	17_F	0.967012	0.955151	0.243302	1.17709	0.266231	0.253831	1.0009	0.936254	1.10405	1.12783	0.695242	0.65475	0.435911	0.582092	0.641872	0.697883	0.205075	0.252171	0.246298	0.620962	1e-35	0.0651282	0.289241	0.916237	0.818353	0.522412	0.0971132	0.235455	0.182769	0.316144	1.10829	1.08762	0.681928	1.24112	0.69392	0.353152	1.06653	0.904609	0.200149	0.177609	0.246788	0.939093	0.855043	0.98124	0.584128
17_P	0.3926	-0.1536	-0.0034	17_P	1.02402	1.01826	0.20866	1.23538	0.201244	0.262111	1.0534	0.992319	1.15715	1.15727	0.755029	0.675422	0.479596	0.639328	0.697343	0.747419	0.25372	0.29289	0.293215	0.684412	0.0651282	1e-35	0.300523	0.970539	0.871528	0.570257	0.078576	0.286115	0.135317	0.355386	1.14591	1.14839	0.72831	1.28644	0.734824	0.387006	1.1231	0.958921	0.186205	0.119743	0.18435	0.997606	0.906707	1.032	0.521621
18_F	0.3314	0.0953	-0.1603	18_F	0.842741	0.9157	0.429719	1.28752	0.400831	0.47082	0.839853	0.805422	0.946194	0.922175	0.802198	0.587691	0.674827	0.692099	0.756665	0.902996	0.441053	0.46022	0.471832	0.715582	0.289241	0.300523	1e-35	0.941264	0.862749	0.603338	0.29316	0.435359	0.398013	0.575217	0.928262	0.999224	0.7197	1.26897	0.913339	0.456461	1.19503	1.08057	0.478592	0.287921	0.352309	1.01408	0.709947	0.810639	0.632277
18_P	-0.5768	-0.1126	-0.0264	18_P	0.687992	0.688292	1.14762	0.526652	1.13868	0.824165	0.789191	0.672336	0.887867	1.39575	0.367535	0.633822	0.832885	0.389172	0.354523	0.818212	0.770201	0.720251	0.735831	0.645695	0.916237	0.970539	0.941264	1e-35	0.110844	0.417482	0.924971	0.71168	1.09038	0.819498	1.29594	0.66221	0.28572	0.400301	0.987907	0.629293	0.495036	0.795432	0.969327	1.05581	1.10683	0.234767	0.873299	0.756996	1.47168
19_F	-0.4788	-0.1631	-0.0149	19_F	0.712774	0.7021	1.04899	0.548769	1.03772	0.716496	0.811513	0.693555	0.916405	1.38042	0.297293	0.572716	0.737815	0.292465	0.257425	0.744207	0.666872	0.613986	0.631042	0.58984	0.818353	0.871528	0.862749	0.110844	1e-35	0.31209	0.825315	0.608239	0.989614	0.716449	1.28674	0.707984	0.19428	0.460885	0.909702	0.526646	0.4905	0.747301	0.862591	0.9586	1.00774	0.244527	0.86614	0.778999	1.37295
19_P	-0.1727	-0.2157	-0.0455	19_P	0.780822	0.778248	0.756185	0.766511	0.728095	0.407692	0.856052	0.751415	0.973764	1.29216	0.328358	0.41699	0.532854	0.196857	0.222264	0.649339	0.379995	0.313692	0.345056	0.52407	0.522412	0.570257	0.603338	0.417482	0.31209	1e-35	0.519244	0.316511	0.689272	0.462365	1.22521	0.840427	0.171832	0.720195	0.774747	0.217307	0.668939	0.750028	0.560429	0.65499	0.699705	0.485896	0.836246	0.820763	1.06456
21_F	0.3451	-0.1799	-0.0602	21_F	1.01124	1.01937	0.283567	1.21329	0.217679	0.210676	1.04086	0.977444	1.15037	1.18207	0.732224	0.602663	0.501661	0.608815	0.66455	0.765896	0.243617	0.257368	0.275393	0.694648	0.0971132	0.078576	0.29316	0.924971	0.825315	0.519244	1e-35	0.2604	0.20251	0.366705	1.1699	1.1353	0.672434	1.2286	0.77067	0.323559	1.10138	0.970439	0.195679	0.139689	0.189972	0.965845	0.912454	1.01373	0.550997
21_P	0.1217	-0.2085	0.0705	21_P	0.891152	0.851724	0.447942	0.955011	0.46317	0.194596	0.951765	0.863156	1.05916	1.21503	0.479316	0.575737	0.321602	0.359936	0.414249	0.55084	0.0659001	0.0589154	0.0506693	0.487621	0.235455	0.286115	0.435359	0.71168	0.608239	0.316511	0.2604	1e-35	0.38684	0.20051	1.16622	0.980311	0.486937	1.03272	0.60397	0.205373	0.841652	0.735248	0.267427	0.394365	0.44634	0.720032	0.842601	0.93088	0.799101
25_F	0.5077	-0.1851	0.0604	25_F	1.1317	1.10733	0.0921428	1.32077	0.169029	0.346586	1.16047	1.10228	1.25762	1.20625	0.850274	0.804748	0.502384	0.742187	0.798484	0.774072	0.338532	0.391113	0.379281	0.753501	0.182769	0.135317	0.398013	1.09038	0.989614	0.689272	0.20251	0.38684	1e-35	0.392566	1.20111	1.25453	0.852254	1.40663	0.729965	0.508783	1.20488	0.998052	0.197386	0.157294	0.187969	1.10082	0.994192	1.14446	0.440723
25_P	0.1768	-0.2757	0.2512	25_P	1.0026	0.903807	0.429774	0.951962	0.513755	0.296446	1.07461	0.981783	1.16852	1.2958	0.516996	0.77048	0.150027	0.43376	0.477617	0.415189	0.153654	0.213924	0.15335	0.473691	0.316144	0.355386	0.575217	0.819498	0.716449	0.462365	0.366705	0.20051	0.392566	1e-35	1.23838	1.07267	0.631237	1.14065	0.433789	0.390682	0.8307	0.631175	0.261553	0.4719	0.517467	0.771812	0.93621	1.06667	0.824564
28_F	0.1395	0.9561	0.1293	28_F	0.660421	0.744751	1.17221	1.51723	1.27807	1.31179	0.588357	0.665746	0.539719	0.171624	1.19804	1.2814	1.22485	1.19186	1.24876	1.28035	1.17288	1.22036	1.196	0.965429	1.10829	1.14591	0.928262	1.29594	1.28674	1.22521	1.1699	1.16622	1.20111	1.23838	1e-35	0.786926	1.27181	1.66028	1.28259	1.23047	1.49205	1.33895	1.29725	1.16945	1.24341	1.32051	0.422857	0.642509	1.41527
28_P	-0.5215	0.5291	0.1275	28_P	0.191521	0.261755	1.27166	0.856661	1.33588	1.15276	0.302472	0.230785	0.307309	0.924087	0.710167	0.988674	1.04391	0.763779	0.783707	0.99983	1.01963	1.02405	1.01141	0.669287	1.08762	1.14839	0.999224	0.66221	0.707984	0.840427	1.1353	0.980311	1.25453	1.07267	0.786926	1e-35	0.797253	0.97679	1.11378	0.981976	0.875593	0.953801	1.22859	1.22224	1.29759	0.683077	0.435976	0.344824	1.6158
29_F	-0.3238	-0.2005	-0.1259	29_F	0.755175	0.784526	0.920398	0.723425	0.878395	0.564168	0.832024	0.725696	0.95175	1.34422	0.367798	0.393315	0.690395	0.281624	0.275141	0.768192	0.551097	0.483255	0.516827	0.618276	0.681928	0.72831	0.7197	0.28572	0.19428	0.171832	0.672434	0.486937	0.852254	0.631237	1.27181	0.797253	1e-35	0.561835	0.911943	0.35942	0.64584	0.827511	0.726971	0.803609	0.845901	0.424264	0.86566	0.788216	1.2095
29_P	-0.8664	-0.321	-0.2079	29_P	1.02365	1.05527	1.47602	0.681219	1.42713	1.09477	1.1105	1.00822	1.20527	1.75465	0.724688	0.811283	1.16744	0.738593	0.687967	1.14554	1.093	1.02414	1.05357	1.03358	1.24112	1.28644	1.26897	0.400301	0.460885	0.720195	1.2286	1.03272	1.40663	1.14065	1.66028	0.97679	0.561835	1e-35	1.32363	0.907157	0.684809	1.09941	1.26302	1.36033	1.39622	0.530996	1.2426	1.06623	1.75541
30_F	0.1134	-0.2046	0.6744	30_F	1.09657	0.880729	0.717332	0.892001	0.887147	0.729835	1.19138	1.09463	1.24674	1.37488	0.620432	1.15114	0.287035	0.63708	0.662199	0.18626	0.568179	0.632733	0.567913	0.453394	0.69392	0.734824	0.913339	0.987907	0.909702	0.774747	0.77067	0.60397	0.729965	0.433789	1.28259	1.11378	0.911943	1.32363	1e-35	0.790253	0.788088	0.373875	0.6604	0.846686	0.899171	0.841209	1.02066	1.21352	1.14091
30_P	0.0324	-0.246	-0.1106	30_P	0.88821	0.90541	0.586483	0.967912	0.52151	0.219744	0.940783	0.853655	1.06212	1.27213	0.507796	0.382242	0.510911	0.368696	0.409497	0.708891	0.263608	0.180801	0.241733	0.61195	0.353152	0.387006	0.456461	0.629293	0.526646	0.217307	0.323559	0.205373	0.508783	0.390682	1.23047	0.981976	0.35942	0.907157	0.790253	1e-35	0.861454	0.862493	0.387574	0.456885	0.492207	0.698885	0.884093	0.902495	0.855152
31_F	-0.6333	-0.2831	0.4349	31_F	0.958817	0.782746	1.24451	0.132391	1.30089	0.971089	1.08888	0.962632	1.15137	1.6188	0.393344	1.03849	0.768673	0.511294	0.4568	0.604393	0.873135	0.852735	0.836449	0.621375	1.06653	1.1231	1.19503	0.495036	0.4905	0.668939	1.10138	0.841652	1.20488	0.8307	1.49205	0.875593	0.64584	0.684809	0.788088	0.861454	1e-35	0.4676	1.06157	1.23504	1.28732	0.271371	1.09554	1.09174	1.63452
31_P	-0.2593	-0.1881	0.699	31_P	0.997952	0.744374	1.0067	0.549799	1.13738	0.887245	1.11917	1.00526	1.1655	1.46228	0.467963	1.16264	0.501869	0.561162	0.554427	0.234422	0.732188	0.762366	0.712553	0.419853	0.904609	0.958921	1.08057	0.795432	0.747301	0.750028	0.970439	0.735248	0.998052	0.631175	1.33895	0.953801	0.827511	1.09941	0.373875	0.862493	0.4676	1e-35	0.892456	1.07842	1.13673	0.59128	1.01438	1.1441	1.43462
32_F	0.3646	-0.3203	0.0747	32_F	1.12598	1.08519	0.2721	1.18331	0.269099	0.187399	1.17278	1.09696	1.27695	1.32145	0.728225	0.729255	0.39955	0.615277	0.661951	0.672681	0.219836	0.249225	0.24523	0.696476	0.200149	0.186205	0.478592	0.969327	0.862591	0.560429	0.195679	0.267427	0.197386	0.261553	1.29725	1.22859	0.726971	1.26302	0.6604	0.387574	1.06157	0.892456	1e-35	0.265788	0.282845	0.972055	1.03354	1.15269	0.583864
32_P	0.4768	-0.1424	-0.0878	32_P	1.08575	1.10462	0.222749	1.3463	0.11819	0.334608	1.10205	1.05146	1.20724	1.16332	0.863332	0.69237	0.597068	0.743292	0.800924	0.866128	0.368735	0.394651	0.405412	0.794536	0.177609	0.119743	0.287921	1.05581	0.9586	0.65499	0.139689	0.394365	0.157294	0.4719	1.16945	1.22224	0.803609	1.36033	0.846686	0.456885	1.23504	1.07842	0.265788	1e-35	0.0821787	1.09953	0.957646	1.07627	0.421101
33_F	0.5221	-0.199	-0.1265	33_F	1.16071	1.18372	0.255352	1.4011	0.0551559	0.351916	1.17546	1.12542	1.28268	1.23147	0.92172	0.713701	0.648297	0.798076	0.852546	0.921208	0.420797	0.437272	0.454074	0.867672	0.246788	0.18435	0.352309	1.10683	1.00774	0.699705	0.189972	0.44634	0.187969	0.517467	1.24341	1.29759	0.845901	1.39622	0.899171	0.492207	1.28732	1.13673	0.282845	0.0821787	1e-35	1.15497	1.03633	1.14681	0.365212
33_P	-0.5828	-0.1467	0.2058	33_P	0.743321	0.639104	1.14759	0.313139	1.17863	0.855643	0.865556	0.73959	0.944165	1.43723	0.261842	0.81107	0.74504	0.360098	0.311524	0.660238	0.766237	0.734387	0.73077	0.542523	0.939093	0.997606	1.01408	0.234767	0.244527	0.485896	0.965845	0.720032	1.10082	0.771812	1.32051	0.683077	0.424264	0.530996	0.841209	0.698885	0.271371	0.59128	0.972055	1.09953	1.15497	1e-35	0.904812	0.855582	1.51548
34_F	-0.094	0.6058	0.0896	34_F	0.283479	0.391703	0.991394	1.12319	1.07489	1.0056	0.265905	0.280896	0.294361	0.537336	0.797602	0.936817	0.926443	0.795995	0.847644	0.969383	0.864784	0.895232	0.876261	0.621438	0.855043	0.906707	0.709947	0.873299	0.86614	0.836246	0.912454	0.842601	0.994192	0.93621	0.422857	0.435976	0.86566	1.2426	1.02066	0.884093	1.09554	1.01438	1.03354	0.957646	1.03633	0.904812	1e-35	0.3177	1.29979
34_P	-0.3124	0.5875	-0.1404	34_P	0.177349	0.485344	1.16448	1.10174	1.19306	1.07463	0.0870303	0.147822	0.212152	0.729565	0.823237	0.832693	1.07967	0.81789	0.855324	1.12234	0.972138	0.972214	0.972876	0.772028	0.98124	1.032	0.810639	0.756996	0.778999	0.820763	1.01373	0.93088	1.14446	1.06667	0.642509	0.344824	0.788216	1.06623	1.21352	0.902495	1.09174	1.1441	1.15269	1.07627	1.14681	0.855582	0.3177	1e-35	1.43895
36_F	0.885	-0.2101	-0.166	36_F	1.46628	1.49291	0.436758	1.75107	0.339641	0.696118	1.46363	1.43179	1.56046	1.36827	1.27524	1.03788	0.935978	1.15665	1.21139	1.20656	0.762383	0.790791	0.798657	1.1829	0.584128	0.521621	0.632277	1.47168	1.37295	1.06456	0.550997	0.799101	0.440723	0.824564	1.41527	1.6158	1.2095	1.75541	1.14091	0.855152	1.63452	1.43462	0.583864	0.421101	0.365212	1.51548	1.29979	1.43895	1e-35
36_P	0.3676	-0.2543	0.1154	36_P	1.0812	1.03307	0.226293	1.17029	0.281945	0.232365	1.12759	1.05373	1.22739	1.25822	0.709865	0.74978	0.361721	0.603339	0.654823	0.637071	0.197222	0.253474	0.232776	0.645901	0.158942	0.157731	0.4467	0.965442	0.861213	0.565069	0.192034	0.254127	0.165655	0.235169	1.23178	1.18506	0.734271	1.27739	0.616092	0.404356	1.05105	0.859055	0.0775983	0.256391	0.292308	0.960734	0.976479	1.11196	0.590629
37_F	-0.2401	0.4413	-0.089	37_F	0.191727	0.427975	1.01012	1.00341	1.04076	0.908255	0.201871	0.14545	0.329946	0.76172	0.67513	0.71269	0.913151	0.658874	0.7014	0.969219	0.802036	0.802581	0.802228	0.624209	0.819638	0.872664	0.671872	0.651223	0.65404	0.661879	0.853919	0.760644	0.986865	0.896455	0.675848	0.365742	0.648286	0.993725	1.06063	0.739665	0.976644	1.00869	0.986151	0.924474	0.996162	0.741683	0.283379	0.171008	1.30234
37_P	0.2202	0.8873	-0.0553	37_P	0.68239	0.82551	1.09395	1.565	1.16856	1.23068	0.589612	0.672699	0.58095	0.143593	1.20161	1.16587	1.21587	1.1718	1.23205	1.31328	1.1166	1.15678	1.14192	0.99718	1.02604	1.05636	0.806632	1.279	1.26237	1.17093	1.07449	1.10739	1.11628	1.20349	0.212892	0.843707	1.21829	1.63217	1.31762	1.15009	1.52925	1.39835	1.22313	1.06169	1.12972	1.33497	0.446049	0.617078	1.28783
39_F	-0.195	0.595	-0.1059	39_F	0.217757	0.483309	1.07653	1.14147	1.11548	1.02609	0.126876	0.188536	0.232932	0.627174	0.824686	0.832982	1.02565	0.810497	0.855928	1.08413	0.91686	0.926097	0.922844	0.732696	0.908116	0.957174	0.727844	0.807954	0.814579	0.813253	0.945657	0.881492	1.06301	1.01187	0.54553	0.406719	0.806108	1.14028	1.15902	0.871214	1.12055	1.12483	1.08791	0.997698	1.07009	0.893121	0.220313	0.122594	1.34841
39_P	0.3071	0.7377	-0.222	39_P	0.739124	0.912939	0.97282	1.58527	1.00849	1.10087	0.646006	0.714401	0.684285	0.359255	1.1769	1.01448	1.16719	1.12044	1.1832	1.30924	1.01851	1.04981	1.0458	1.00743	0.900976	0.92169	0.645814	1.24199	1.21325	1.08182	0.93253	1.00758	0.985672	1.126	0.446318	0.92317	1.13468	1.58055	1.31491	1.02739	1.53555	1.42343	1.10032	0.906302	0.965791	1.32556	0.52476	0.64265	1.1115
40_F	0.4208	1.0264	-0.003	40_F	0.921961	1.03111	1.17861	1.77705	1.26875	1.38543	0.833873	0.915544	0.811591	0.15721	1.40723	1.37355	1.35752	1.37548	1.43861	1.462	1.27173	1.32212	1.30261	1.17261	1.15864	1.18034	0.948516	1.51429	1.49142	1.37727	1.21003	1.27273	1.21627	1.34893	0.318708	1.07344	1.44042	1.87466	1.43831	1.3347	1.73714	1.55896	1.35011	1.17321	1.23577	1.55787	0.671192	0.865502	1.33078
40_P	0.1671	0.5517	0.0258	40_P	0.528562	0.618499	0.799379	1.27935	0.882145	0.898209	0.491415	0.50927	0.541867	0.456477	0.876719	0.899827	0.872794	0.837574	0.900962	0.983954	0.772392	0.814231	0.796289	0.674715	0.701835	0.741047	0.519547	0.998702	0.964252	0.842289	0.757838	0.762865	0.812453	0.857607	0.418346	0.696436	0.910934	1.37271	0.997775	0.820411	1.22674	1.08735	0.895423	0.768501	0.844257	1.04044	0.274172	0.508748	1.06419
43_F	0.7454	-0.1209	-0.0757	43_F	1.29223	1.30793	0.267822	1.59234	0.222614	0.577092	1.29464	1.25963	1.3887	1.21906	1.1135	0.936632	0.778871	1.00055	1.05893	1.0462	0.608004	0.647862	0.648043	1.00204	0.419076	0.361614	0.474653	1.32315	1.22643	0.923475	0.404921	0.646568	0.281329	0.673894	1.25263	1.43834	1.07333	1.62955	0.984418	0.724732	1.47913	1.27047	0.4554	0.269731	0.241957	1.35795	1.1225	1.27474	0.188677
43_P	0.3903	-0.2807	0.1168	43_P	1.116	1.06679	0.223122	1.1925	0.272093	0.240604	1.16214	1.08844	1.26204	1.28652	0.736182	0.769301	0.37771	0.629602	0.67933	0.653111	0.225664	0.276296	0.258326	0.675724	0.186272	0.174951	0.470776	0.991991	0.886854	0.589521	0.208645	0.281962	0.161564	0.25233	1.26204	1.21954	0.758468	1.29859	0.627202	0.425449	1.07189	0.877218	0.0632539	0.261668	0.288515	0.986306	1.01053	1.14617	0.574185
44_F	-0.3108	-0.2016	-0.1242	44_F	0.756676	0.785274	0.907524	0.729789	0.865314	0.551219	0.832879	0.726917	0.952916	1.33934	0.366489	0.387997	0.680515	0.276056	0.271877	0.762078	0.538607	0.470471	0.504443	0.613152	0.669063	0.71531	0.70843	0.297055	0.20409	0.159575	0.659372	0.474354	0.839221	0.619814	1.26779	0.801043	0.0131568	0.574416	0.904277	0.346327	0.65057	0.82492	0.714014	0.79066	0.832907	0.431159	0.862906	0.789268	1.19656
44_P	-0.1459	-0.1879	-0.0244	44_P	0.759528	0.752258	0.72329	0.774561	0.704376	0.392488	0.834218	0.73038	0.950693	1.25602	0.319164	0.431825	0.502477	0.183973	0.222329	0.624959	0.34816	0.288365	0.315187	0.48951	0.489694	0.54	0.57139	0.437435	0.333958	0.0440033	0.492368	0.284676	0.659084	0.433358	1.18904	0.823552	0.205206	0.75532	0.745545	0.20639	0.676445	0.732234	0.53662	0.627571	0.675849	0.495551	0.803523	0.801513	1.04082
45_F	0.4552	0.0991	-0.0885	45_F	0.934092	0.97984	0.331637	1.36386	0.345453	0.506435	0.930981	0.900578	1.02649	0.923627	0.877904	0.720706	0.669718	0.773115	0.839154	0.908504	0.466429	0.506834	0.505638	0.751626	0.279321	0.273894	0.143165	1.05532	0.972893	0.703709	0.30127	0.480751	0.325111	0.577389	0.93891	1.08881	0.835464	1.39189	0.889425	0.546207	1.26683	1.10143	0.459063	0.242465	0.307869	1.10656	0.76817	0.911284	0.535107
45_P	0.6465	-0.0702	-0.4599	45_P	1.27274	1.37753	0.588193	1.67916	0.409498	0.664665	1.24911	1.23088	1.35865	1.23089	1.19646	0.762306	1.0078	1.067	1.12142	1.27294	0.754112	0.750525	0.782601	1.15544	0.575369	0.528974	0.465229	1.29853	1.21365	0.929509	0.51248	0.758858	0.550617	0.876648	1.28744	1.4382	1.03442	1.55411	1.26051	0.728035	1.57603	1.47561	0.654076	0.415294	0.378445	1.40007	1.14336	1.20588	0.403524
46_F	0.1739	-0.0677	-0.1103	46_F	0.819861	0.859177	0.455237	1.09706	0.413899	0.288463	0.849494	0.783495	0.965708	1.07703	0.611201	0.454959	0.531202	0.487138	0.547109	0.754642	0.26529	0.252574	0.280573	0.598604	0.219642	0.25814	0.23211	0.756707	0.666498	0.382406	0.210733	0.235028	0.392866	0.417079	1.05203	0.946731	0.515349	1.07513	0.798847	0.227625	0.997603	0.92581	0.366604	0.312785	0.372485	0.823866	0.751886	0.816505	0.727354
46_P	0.2406	-0.1793	-0.0065	46_P	0.937531	0.928812	0.346713	1.096	0.329525	0.16841	0.979672	0.90571	1.08918	1.17673	0.615084	0.569173	0.415701	0.492783	0.549122	0.66866	0.138717	0.150966	0.16681	0.591649	0.113316	0.154189	0.327573	0.820358	0.719631	0.416729	0.117492	0.144633	0.275412	0.282441	1.14795	1.04909	0.577281	1.13406	0.693141	0.242142	0.984535	0.864701	0.204574	0.252511	0.306644	0.850953	0.858822	0.95484	0.66456
47_F	-0.5243	-0.1251	-0.0784	47_F	0.691192	0.712158	1.10343	0.590519	1.08322	0.771446	0.784242	0.670647	0.89069	1.37765	0.375106	0.559341	0.815434	0.369123	0.340604	0.825685	0.729059	0.674085	0.695041	0.650184	0.868157	0.920404	0.887416	0.0749433	0.0868706	0.364573	0.871316	0.668164	1.04302	0.789213	1.2856	0.685843	0.219412	0.414945	0.989793	0.570586	0.548016	0.823738	0.922868	1.00129	1.05011	0.290961	0.864637	0.746019	1.41458
47_P	0.0541	-0.0681	0.0415	47_P	0.735764	0.718309	0.517738	0.92026	0.543144	0.327457	0.793499	0.706691	0.901976	1.08637	0.431596	0.529485	0.397023	0.319638	0.38564	0.582183	0.2024	0.205518	0.201193	0.415058	0.290999	0.352006	0.379892	0.636102	0.544232	0.284241	0.327907	0.158502	0.468828	0.319573	1.0315	0.833882	0.434006	0.98665	0.650162	0.235061	0.820675	0.738191	0.401394	0.448235	0.514182	0.66243	0.691656	0.772801	0.86811
48_F	0.3324	0.8103	0.0386	48_F	0.745064	0.83759	0.978316	1.55779	1.07389	1.16185	0.675116	0.735178	0.676309	0.197492	1.17443	1.17254	1.126	1.14071	1.20446	1.23324	1.04094	1.09152	1.07057	0.941788	0.93946	0.966691	0.74215	1.29716	1.26823	1.14668	0.995198	1.04085	1.01095	1.1175	0.258253	0.903395	1.2163	1.66665	1.21747	1.10817	1.51167	1.3353	1.13163	0.971836	1.04016	1.33469	0.475645	0.7053	1.17832
48_P	-0.5493	0.4449	-0.2386	48_P	0.335581	0.587876	1.3039	0.988345	1.30187	1.11615	0.348963	0.31581	0.436374	1.02114	0.79025	0.77529	1.15361	0.794199	0.810521	1.17548	1.04001	1.01611	1.02841	0.853908	1.08843	1.14048	0.950781	0.597153	0.651672	0.784543	1.10551	0.986263	1.26631	1.13419	0.933339	0.376685	0.692887	0.829516	1.30176	0.912196	0.99531	1.16785	1.23244	1.19186	1.25502	0.740678	0.583868	0.293427	1.57845
50_F	-0.5697	-0.1619	-0.0307	50_F	0.7331	0.728748	1.14112	0.524566	1.12724	0.804799	0.833269	0.716437	0.933806	1.43123	0.364923	0.624132	0.82285	0.379623	0.339323	0.811844	0.758953	0.705167	0.722812	0.658812	0.909835	0.962723	0.946007	0.0499939	0.0922707	0.400902	0.915453	0.700319	1.08149	0.806028	1.3336	0.710515	0.266495	0.380452	0.982657	0.613173	0.485302	0.793408	0.953476	1.04824	1.09662	0.23735	0.911112	0.799899	1.46177
50_P	-0.8785	-0.2251	-0.5662	50_P	1.09469	1.22273	1.59668	1.03107	1.50742	1.22088	1.14249	1.07031	1.24479	1.77692	0.980426	0.778864	1.39214	0.958838	0.926784	1.4228	1.25099	1.17466	1.21768	1.25757	1.35474	1.39196	1.31578	0.62854	0.683766	0.877138	1.32487	1.18578	1.52177	1.3358	1.70742	1.08512	0.708633	0.371109	1.58851	1.0187	1.03232	1.40908	1.40183	1.43963	1.46823	0.830403	1.31754	1.078	1.8084
52_F	0.3225	-0.2702	-0.0952	52_F	1.06593	1.07521	0.34673	1.20831	0.234137	0.143662	1.09978	1.03118	1.21377	1.27363	0.737026	0.57362	0.522048	0.607455	0.656176	0.785254	0.258578	0.242456	0.277897	0.73985	0.184284	0.164124	0.371359	0.915594	0.812404	0.500663	0.0994477	0.267552	0.256422	0.375835	1.26004	1.18356	0.650772	1.19531	0.800194	0.291515	1.09303	0.98792	0.182067	0.20049	0.214218	0.961988	0.987421	1.06808	0.570115
52_P	0.0432	-0.389	0.0482	52_P	1.01255	0.96676	0.580244	0.908069	0.55288	0.195779	1.08339	0.984775	1.19536	1.40415	0.479569	0.573891	0.383538	0.357741	0.383209	0.577676	0.225445	0.151465	0.185384	0.593401	0.393933	0.424448	0.600898	0.682907	0.572273	0.292276	0.382906	0.19809	0.507429	0.268132	1.35098	1.08078	0.447808	0.947409	0.65655	0.21397	0.786387	0.745257	0.329727	0.517027	0.544027	0.689509	1.00507	1.05621	0.886856
55_F	0.5002	-0.2262	-0.3938	55_F	1.22527	1.30714	0.523218	1.5134	0.303178	0.473401	1.22328	1.18352	1.34166	1.31286	1.04059	0.617795	0.865985	0.905327	0.953297	1.13108	0.599825	0.578258	0.620536	1.04406	0.45696	0.411413	0.431715	1.1436	1.05166	0.757771	0.370795	0.599291	0.456117	0.723231	1.34223	1.37336	0.866837	1.38244	1.13628	0.547203	1.40528	1.33135	0.496724	0.318129	0.269571	1.24046	1.13092	1.17756	0.447463
55_P	0.1445	-0.25	0.1393	55_P	0.944311	0.880026	0.432327	0.950829	0.471899	0.209649	1.01022	0.919121	1.11274	1.25818	0.489269	0.652257	0.251444	0.381863	0.431241	0.495391	0.0539758	0.0977469	0.0341846	0.483652	0.256507	0.30201	0.493887	0.752734	0.647945	0.368705	0.29147	0.0835196	0.377295	0.11927	1.20615	1.02503	0.54045	1.07122	0.537922	0.273921	0.832735	0.692929	0.239915	0.416624	0.464578	0.737603	0.889801	0.994181	0.80196
56_F	-0.6549	-0.2617	-0.3055	56_F	0.913824	0.985953	1.29396	0.769343	1.22689	0.914054	0.985363	0.888803	1.09654	1.59542	0.647281	0.573523	1.05129	0.620314	0.584994	1.0819	0.928329	0.854206	0.892211	0.939199	1.05397	1.09554	1.05892	0.325925	0.35381	0.549757	1.03289	0.864473	1.22122	1.00092	1.51762	0.9114	0.381613	0.240363	1.24649	0.714572	0.741024	1.0821	1.08966	1.15861	1.19218	0.52901	1.10601	0.930433	1.54707
56_P	0.548	-0.1617	0.0271	56_P	1.1479	1.13479	0.0952072	1.37025	0.141346	0.384821	1.17025	1.11751	1.26723	1.19158	0.896134	0.815602	0.557178	0.786407	0.843818	0.827549	0.386642	0.435469	0.42763	0.795091	0.212587	0.158572	0.384816	1.12714	1.02766	0.726357	0.221633	0.431052	0.057276	0.448337	1.19449	1.27715	0.885974	1.44261	0.780842	0.540288	1.25559	1.05066	0.247094	0.136543	0.160172	1.14493	1.00256	1.1531	0.391407
58_F	-0.0392	-0.0541	0.1554	58_F	0.687697	0.617788	0.607503	0.792628	0.667714	0.42912	0.766892	0.666386	0.865051	1.10286	0.308662	0.6219	0.345801	0.227767	0.295999	0.468559	0.271811	0.286354	0.25919	0.278603	0.406979	0.470711	0.509246	0.570515	0.483871	0.290341	0.458253	0.238613	0.570338	0.323945	1.02622	0.757307	0.426098	0.942063	0.561514	0.33572	0.695353	0.601582	0.490336	0.577234	0.644609	0.553729	0.665433	0.757487	0.990848
58_P	0.0562	-0.1125	-0.1112	58_P	0.785263	0.820681	0.555407	0.99413	0.5117	0.289924	0.828344	0.749263	0.948891	1.13745	0.516031	0.383658	0.523254	0.38559	0.440501	0.720672	0.270942	0.225706	0.26552	0.563715	0.312216	0.355633	0.34832	0.638655	0.545948	0.259542	0.30101	0.215688	0.488436	0.415346	1.09849	0.895749	0.390333	0.950797	0.793046	0.135606	0.895957	0.872743	0.415753	0.42231	0.474109	0.714129	0.760813	0.791656	0.836324
60_F	0.7116	-0.0368	0.0775	60_F	1.21882	1.20459	0.185357	1.5234	0.304948	0.594765	1.22748	1.19115	1.31066	1.12564	1.05225	0.986413	0.688674	0.954227	1.01574	0.940437	0.567431	0.629493	0.611641	0.895598	0.388762	0.349211	0.467495	1.2948	1.20064	0.910561	0.416847	0.61442	0.252706	0.610947	1.1471	1.35767	1.06781	1.62859	0.861562	0.735159	1.41321	1.16267	0.448095	0.305952	0.322234	1.30538	1.03057	1.21894	0.345533
60_P	0.1203	-0.1895	-0.4528	60_P	0.99443	1.11113	0.723405	1.26057	0.563208	0.455011	1.00312	0.949888	1.13437	1.28704	0.821601	0.233348	0.844741	0.687715	0.723911	1.06027	0.565603	0.502261	0.563245	0.916298	0.526002	0.526684	0.459598	0.820779	0.742546	0.502423	0.452506	0.523647	0.643018	0.711504	1.28515	1.12474	0.551552	1.02511	1.12732	0.357798	1.1682	1.21274	0.595858	0.512382	0.517692	0.964332	0.986217	0.94263	0.816973
61_F	0.7699	-0.1831	-0.207	61_F	1.36154	1.40035	0.388982	1.66049	0.248344	0.603155	1.35863	1.32555	1.45984	1.30245	1.1804	0.914967	0.875124	1.05828	1.11342	1.14819	0.675413	0.697081	0.710647	1.10211	0.491932	0.429742	0.521507	1.36058	1.26355	0.956891	0.449461	0.70556	0.374507	0.755175	1.34472	1.51223	1.09684	1.6421	1.09924	0.746429	1.54629	1.37117	0.512296	0.319018	0.261032	1.41475	1.20692	1.33028	0.125132
61_P	-0.1055	-0.1911	0.2611	61_P	0.809336	0.68864	0.684141	0.675935	0.750364	0.461677	0.905625	0.794128	0.99677	1.26775	0.223734	0.715623	0.27564	0.175381	0.215341	0.337115	0.319076	0.323682	0.289542	0.288674	0.507565	0.565217	0.671181	0.557622	0.465095	0.314841	0.553534	0.297071	0.645237	0.29487	1.18045	0.842373	0.444424	0.903219	0.467885	0.400239	0.563244	0.464133	0.52195	0.68057	0.737684	0.48254	0.815226	0.900127	1.07883
63_F	-0.8375	-0.3103	-0.3615	63_F	1.04678	1.12028	1.48892	0.827171	1.41839	1.1019	1.11779	1.02583	1.22002	1.75521	0.807054	0.748354	1.22953	0.797927	0.755499	1.23839	1.11998	1.04515	1.08257	1.10741	1.24976	1.29071	1.25352	0.468339	0.520063	0.742135	1.22733	1.05691	1.41536	1.1855	1.67308	1.02155	0.575718	0.156661	1.41013	0.90764	0.822612	1.21405	1.27883	1.35295	1.38424	0.643014	1.26314	1.06333	1.73645
63_P	-0.5021	-0.3827	-0.586	63_P	1.11358	1.23374	1.29887	1.08355	1.17375	0.904728	1.15464	1.07805	1.2799	1.69385	0.875978	0.470605	1.17328	0.800886	0.780939	1.27154	0.984376	0.896963	0.953148	1.14314	1.06773	1.09197	1.05092	0.625848	0.612309	0.654625	1.01752	0.922206	1.21514	1.08317	1.64793	1.15795	0.526003	0.52866	1.41392	0.728274	1.0341	1.32214	1.0916	1.12436	1.13749	0.830154	1.26496	1.08436	1.45953
66_F	-0.1011	-0.1407	0.1129	66_F	0.733241	0.674182	0.662529	0.74083	0.692983	0.403015	0.816971	0.710256	0.921519	1.19934	0.254421	0.566923	0.376413	0.136633	0.202668	0.488967	0.285458	0.26472	0.256432	0.34874	0.448522	0.507377	0.563374	0.496472	0.399364	0.18932	0.480203	0.236716	0.61267	0.338497	1.123	0.790937	0.331959	0.849179	0.604463	0.280825	0.638121	0.608923	0.500591	0.611761	0.670141	0.490613	0.746897	0.799427	1.02713
66_P	-0.5839	-0.2964	-0.3747	66_P	0.951547	1.0381	1.25694	0.851192	1.17296	0.868832	1.01401	0.92227	1.13176	1.59943	0.682786	0.499441	1.04983	0.634738	0.605242	1.10597	0.903167	0.823704	0.868105	0.967807	1.01757	1.05442	1.01842	0.393885	0.397833	0.532889	0.987686	0.838928	1.18038	0.985314	1.53169	0.968271	0.372492	0.328989	1.26304	0.672395	0.811215	1.12691	1.04985	1.10956	1.13768	0.599493	1.12674	0.953881	1.48616
[truncated: 37 more columns]
