# Supplementary material for: Women choose romantic partners resembling their father in body odour
Source: Research Square preprint supplement (doi:10.21203/rs.3.rs-2531352/v1), 2023-01-31
Supplement: Supplementary file 2 [file 758f39fbff48f761a108d4d7.xlsx]

## Sheet: ID
ID_triad	ID_Father	ID_Partner	ID_Woman
01	01_F	01_P	01_W
02	02_F	02_P	02_W
03	03_F	03_P	03_W
04	04_F	04_P	04_W
05	05_F	05_P	05_W
06	06_F	06_P	06_W
07	07_F	07_P	07_W
08	08_F	08_P	08_W
09	09_F	09_P	09_W
10	10_F	10_P	10_W
11	11_F	11_P	11_W
12	12_F	12_P	12_W
13	13_F	13_P	13_W
14	14_F	14_P	14_W
15	15_F	15_P	15_W
16	16_F	16_P	16_W
17	17_F	17_P	17_W
18	18_F	18_P	18_W
19	19_F	19_P	19_W
20	20_F	20_P	20_W
21	21_F	21_P	21_W
22	22_F	22_P	22_W
23	23_F	23_P	23_W
24	24_F	24_P	24_W
25	25_F	25_P	25_W
26	26_F	26_P	26_W
27	27_F	27_P	27_W
28	28_F	28_P	28_W
29	29_F	29_P	29_W
30	30_F	30_P	30_W
31	31_F	31_P	31_W
32	32_F	32_P	32_W
33	33_F	33_P	33_W
34	34_F	34_P	34_W
35	35_F	35_P	35_W
36	36_F	36_P	36_W
37	37_F	37_P	37_W
38	38_F	38_P	38_W
39	39_F	39_P	39_W
40	40_F	40_P	40_W
41	41_F	41_P	41_W
42	42_F	42_P	42_W
43	43_F	43_P	43_W
44	44_F	44_P	44_W
45	45_F	45_P	45_W
46	46_F	46_P	46_W
47	47_F	47_P	47_W
48	48_F	48_P	48_W
49	49_F	49_P	49_W
50	50_F	50_P	50_W
51	51_F	51_P	51_W
52	52_F	52_P	52_W
53	53_F	53_P	53_W
54	54_F	54_P	54_W
55	55_F	55_P	55_W
56	56_F	56_P	56_W
57	57_F	57_P	57_W
58	58_F	58_P	58_W
59	59_F	59_P	59_W
60	60_F	60_P	60_W
61	61_F	61_P	61_W
62	62_F	62_P	62_W
63	63_F	63_P	63_W
64	64_F	64_P	64_W
65	65_F	65_P	65_W
66	66_F	66_P	66_W
67	67_F	67_P	67_W

## Sheet: Perceived_similarity_rating
rater_code	session_code	triad_ID	target_ID	sample_ID	new_position	partner	armpit
2019B-D2-R1	2019B-D2	01	01_F	O#3M	1	FALSE	L
2019B-D2-R1	2019B-D2	01	01_F	01_P	2	TRUE	L
2019B-D2-R1	2019B-D2	01	01_F	NCC_5M	3	FALSE	L
2019B-D2-R1	2019B-D2	01	01_F	31_P	4	FALSE	L
2019B-D2-R2	2019B-D2	01	01_F	01_P	1	TRUE	L
2019B-D2-R2	2019B-D2	01	01_F	05_P	2	FALSE	L
2019B-D2-R2	2019B-D2	01	01_F	NCC_7M	3	FALSE	L
2019B-D2-R2	2019B-D2	01	01_F	NCC_6M	4	FALSE	L
2019B-D2-R3	2019B-D2	01	01_F	28_P	1	FALSE	L
2019B-D2-R3	2019B-D2	01	01_F	NCC_4M	2	FALSE	L
2019B-D2-R3	2019B-D2	01	01_F	NCC_7M	3	FALSE	L
2019B-D2-R3	2019B-D2	01	01_F	01_P	4	TRUE	L
2019B-D2-R4	2019B-D2	01	01_F	01_P	1	TRUE	L
2019B-D2-R4	2019B-D2	01	01_F	O#3M	2	FALSE	L
2019B-D2-R4	2019B-D2	01	01_F	NCC_1M	3	FALSE	L
2019B-D2-R4	2019B-D2	01	01_F	31_P	4	FALSE	L
2019B-D2-R5	2019B-D2	01	01_F	01_P	1	TRUE	L
2019B-D2-R5	2019B-D2	01	01_F	04_P	2	FALSE	L
2019B-D2-R5	2019B-D2	01	01_F	NCC_4M	3	FALSE	L
2019B-D2-R5	2019B-D2	01	01_F	NCC_8M	4	FALSE	L
2019B-D2-R6	2019B-D2	01	01_F	01_P	1	TRUE	L
2019B-D2-R6	2019B-D2	01	01_F	05_P	2	FALSE	L
2019B-D2-R6	2019B-D2	01	01_F	NCC_7M	3	FALSE	L
2019B-D2-R6	2019B-D2	01	01_F	NCC_8M	4	FALSE	L
2019B-D2-R7	2019B-D2	01	01_F	67_P	1	FALSE	L
2019B-D2-R7	2019B-D2	01	01_F	01_P	2	TRUE	L
2019B-D2-R7	2019B-D2	01	01_F	NCC_4M	3	FALSE	L
2019B-D2-R7	2019B-D2	01	01_F	NCC_2M	4	FALSE	L
2019B-D2-R8	2019B-D2	01	01_F	01_P	1	TRUE	L
2019B-D2-R8	2019B-D2	01	01_F	05_P	2	FALSE	L
2019B-D2-R8	2019B-D2	01	01_F	NCC_2M	3	FALSE	L
2019B-D2-R8	2019B-D2	01	01_F	NCC_23M	4	FALSE	L
2019B-D2-R9	2019B-D2	01	01_F	01_P	1	TRUE	L
2019B-D2-R9	2019B-D2	01	01_F	NCC_7M	2	FALSE	L
2019B-D2-R9	2019B-D2	01	01_F	NCC_3M	3	FALSE	L
2019B-D2-R9	2019B-D2	01	01_F	31_P	4	FALSE	L
2019B-D2-R10	2019B-D2	01	01_F	NCC_2M	1	FALSE	L
2019B-D2-R10	2019B-D2	01	01_F	01_P	2	TRUE	L
2019B-D2-R10	2019B-D2	01	01_F	31_P	3	FALSE	L
2019B-D2-R10	2019B-D2	01	01_F	NCC_8M	4	FALSE	L
2019B-D2-R11	2019B-D2	01	01_F	05_P	1	FALSE	L
2019B-D2-R11	2019B-D2	01	01_F	01_P	2	TRUE	L
2019B-D2-R11	2019B-D2	01	01_F	NCC_8M	3	FALSE	L
2019B-D2-R11	2019B-D2	01	01_F	NCC_3M	4	FALSE	L
2019B-D2-R12	2019B-D2	01	01_F	NCC_1M	1	FALSE	L
2019B-D2-R12	2019B-D2	01	01_F	01_P	2	TRUE	L
2019B-D2-R12	2019B-D2	01	01_F	NCC_5M	3	FALSE	L
2019B-D2-R12	2019B-D2	01	01_F	31_P	4	FALSE	L
2019B-D2-R13	2019B-D2	01	01_F	04_P	1	FALSE	L
2019B-D2-R13	2019B-D2	01	01_F	NCC_3M	2	FALSE	L
2019B-D2-R13	2019B-D2	01	01_F	01_P	3	TRUE	L
2019B-D2-R13	2019B-D2	01	01_F	NCC_8M	4	FALSE	L
2019B-D2-R14	2019B-D2	01	01_F	04_P	1	FALSE	L
2019B-D2-R14	2019B-D2	01	01_F	NCC_6M	2	FALSE	L
2019B-D2-R14	2019B-D2	01	01_F	NCC_5M	3	FALSE	L
2019B-D2-R14	2019B-D2	01	01_F	01_P	4	TRUE	L
2019B-D2-R15	2019B-D2	01	01_F	01_P	1	TRUE	L
2019B-D2-R15	2019B-D2	01	01_F	NCC_6M	2	FALSE	L
2019B-D2-R15	2019B-D2	01	01_F	NCC_5M	3	FALSE	L
2019B-D2-R15	2019B-D2	01	01_F	05_P	4	FALSE	L
2019B-D2-R16	2019B-D2	01	01_F	01_P	1	TRUE	L
2019B-D2-R16	2019B-D2	01	01_F	NCC_5M	2	FALSE	L
2019B-D2-R16	2019B-D2	01	01_F	05_P	3	FALSE	L
2019B-D2-R16	2019B-D2	01	01_F	NCC_8M	4	FALSE	L
2019B-D2-R17	2019B-D2	01	01_F	NCC_2M	1	FALSE	L
2019B-D2-R17	2019B-D2	01	01_F	O#3M	2	FALSE	L
2019B-D2-R17	2019B-D2	01	01_F	01_P	3	TRUE	L
2019B-D2-R17	2019B-D2	01	01_F	31_P	4	FALSE	L
2019B-D2-R18	2019B-D2	01	01_F	01_P	1	TRUE	L
2019B-D2-R18	2019B-D2	01	01_F	04_P	2	FALSE	L
2019B-D2-R18	2019B-D2	01	01_F	NCC_7M	3	FALSE	L
2019B-D2-R18	2019B-D2	01	01_F	NCC_3M	4	FALSE	L
2019B-D2-R19	2019B-D2	01	01_F	NCC_7M	1	FALSE	L
2019B-D2-R19	2019B-D2	01	01_F	01_P	2	TRUE	L
2019B-D2-R19	2019B-D2	01	01_F	05_P	3	FALSE	L
2019B-D2-R19	2019B-D2	01	01_F	NCC_1M	4	FALSE	L
2019B-D2-R20	2019B-D2	01	01_F	NCC_2M	1	FALSE	L
2019B-D2-R20	2019B-D2	01	01_F	05_P	2	FALSE	L
2019B-D2-R20	2019B-D2	01	01_F	01_P	3	TRUE	L
2019B-D2-R20	2019B-D2	01	01_F	NCC_8M	4	FALSE	L
2019B-D2-R21	2019B-D2	01	01_F	04_P	1	FALSE	L
2019B-D2-R21	2019B-D2	01	01_F	NCC_6M	2	FALSE	L
2019B-D2-R21	2019B-D2	01	01_F	01_P	3	TRUE	L
2019B-D2-R21	2019B-D2	01	01_F	NCC_4M	4	FALSE	L
2019B-D2-R22	2019B-D2	01	01_F	01_P	1	TRUE	L
2019B-D2-R22	2019B-D2	01	01_F	NCC_23M	2	FALSE	L
2019B-D2-R22	2019B-D2	01	01_F	04_P	3	FALSE	L
2019B-D2-R22	2019B-D2	01	01_F	NCC_3M	4	FALSE	L
2019B-D2-R23	2019B-D2	01	01_F	NCC_4M	1	FALSE	L
2019B-D2-R23	2019B-D2	01	01_F	01_P	2	TRUE	L
2019B-D2-R23	2019B-D2	01	01_F	67_P	3	FALSE	L
2019B-D2-R23	2019B-D2	01	01_F	NCC_8M	4	FALSE	L
2019B-D2-R24	2019B-D2	01	01_F	01_P	1	TRUE	L
2019B-D2-R24	2019B-D2	01	01_F	NCC_7M	2	FALSE	L
2019B-D2-R24	2019B-D2	01	01_F	31_P	3	FALSE	L
2019B-D2-R24	2019B-D2	01	01_F	NCC_1M	4	FALSE	L
2019B-D4-R1	2019B-D4	02	02_F	45_P	1	FALSE	L
2019B-D4-R1	2019B-D4	02	02_F	02_P	2	TRUE	L
2019B-D4-R1	2019B-D4	02	02_F	NCC_15M	3	FALSE	L
2019B-D4-R1	2019B-D4	02	02_F	NCC_13M	4	FALSE	L
2019B-D4-R2	2019B-D4	02	02_F	07_P	1	FALSE	L
2019B-D4-R2	2019B-D4	02	02_F	NCC_22M	2	FALSE	L
2019B-D4-R2	2019B-D4	02	02_F	NCC_9M	3	FALSE	L
2019B-D4-R2	2019B-D4	02	02_F	02_P	4	TRUE	L
2019B-D4-R3	2019B-D4	02	02_F	02_P	1	TRUE	L
2019B-D4-R3	2019B-D4	02	02_F	O#12M	2	FALSE	L
2019B-D4-R3	2019B-D4	02	02_F	07_P	3	FALSE	L
2019B-D4-R3	2019B-D4	02	02_F	NCC_22M	4	FALSE	L
2019B-D4-R4	2019B-D4	02	02_F	NCC_13M	1	FALSE	L
2019B-D4-R4	2019B-D4	02	02_F	02_P	2	TRUE	L
2019B-D4-R4	2019B-D4	02	02_F	NCC_11M	3	FALSE	L
2019B-D4-R4	2019B-D4	02	02_F	45_P	4	FALSE	L
2019B-D4-R5	2019B-D4	02	02_F	NCC_10M	1	FALSE	L
2019B-D4-R5	2019B-D4	02	02_F	02_P	2	TRUE	L
2019B-D4-R5	2019B-D4	02	02_F	NCC_11M	3	FALSE	L
2019B-D4-R5	2019B-D4	02	02_F	39_P	4	FALSE	L
2019B-D4-R6	2019B-D4	02	02_F	O#12M	1	FALSE	L
2019B-D4-R6	2019B-D4	02	02_F	07_P	2	FALSE	L
2019B-D4-R6	2019B-D4	02	02_F	02_P	3	TRUE	L
2019B-D4-R6	2019B-D4	02	02_F	NCC_19M	4	FALSE	L
2019B-D4-R7	2019B-D4	02	02_F	NCC_10M	1	FALSE	L
2019B-D4-R7	2019B-D4	02	02_F	02_P	2	TRUE	L
2019B-D4-R7	2019B-D4	02	02_F	NCC_19M	3	FALSE	L
2019B-D4-R7	2019B-D4	02	02_F	39_P	4	FALSE	L
2019B-D4-R8	2019B-D4	02	02_F	NCC_10M	1	FALSE	L
2019B-D4-R8	2019B-D4	02	02_F	02_P	2	TRUE	L
2019B-D4-R8	2019B-D4	02	02_F	07_P	3	FALSE	L
2019B-D4-R8	2019B-D4	02	02_F	NCC_13M	4	FALSE	L
2019B-D4-R9	2019B-D4	02	02_F	O#12M	1	FALSE	L
2019B-D4-R9	2019B-D4	02	02_F	02_P	2	TRUE	L
2019B-D4-R9	2019B-D4	02	02_F	NCC_14M	3	FALSE	L
2019B-D4-R9	2019B-D4	02	02_F	47_P	4	FALSE	L
2019B-D4-R10	2019B-D4	02	02_F	02_P	1	TRUE	L
2019B-D4-R10	2019B-D4	02	02_F	NCC_11M	2	FALSE	L
2019B-D4-R10	2019B-D4	02	02_F	NCC_9M	3	FALSE	L
2019B-D4-R10	2019B-D4	02	02_F	47_P	4	FALSE	L
2019B-D4-R11	2019B-D4	02	02_F	45_P	1	FALSE	L
2019B-D4-R11	2019B-D4	02	02_F	O#12M	2	FALSE	L
2019B-D4-R11	2019B-D4	02	02_F	02_P	3	TRUE	L
2019B-D4-R11	2019B-D4	02	02_F	NCC_22M	4	FALSE	L
2019B-D4-R12	2019B-D4	02	02_F	02_P	1	TRUE	L
2019B-D4-R12	2019B-D4	02	02_F	NCC_15M	2	FALSE	L
2019B-D4-R12	2019B-D4	02	02_F	NCC_19M	3	FALSE	L
2019B-D4-R12	2019B-D4	02	02_F	47_P	4	FALSE	L
2019B-D4-R13	2019B-D4	02	02_F	02_P	1	TRUE	L
2019B-D4-R13	2019B-D4	02	02_F	NCC_19M	2	FALSE	L
2019B-D4-R13	2019B-D4	02	02_F	45_P	3	FALSE	L
2019B-D4-R13	2019B-D4	02	02_F	O#12M	4	FALSE	L
2019B-D4-R14	2019B-D4	02	02_F	NCC_19M	1	FALSE	L
2019B-D4-R14	2019B-D4	02	02_F	NCC_24M	2	FALSE	L
2019B-D4-R14	2019B-D4	02	02_F	56_P	3	FALSE	L
2019B-D4-R14	2019B-D4	02	02_F	02_P	4	TRUE	L
2019B-D4-R15	2019B-D4	02	02_F	NCC_15M	1	FALSE	L
2019B-D4-R15	2019B-D4	02	02_F	NCC_10M	2	FALSE	L
2019B-D4-R15	2019B-D4	02	02_F	56_P	3	FALSE	L
2019B-D4-R15	2019B-D4	02	02_F	02_P	4	TRUE	L
2019B-D4-R16	2019B-D4	02	02_F	02_P	1	TRUE	L
2019B-D4-R16	2019B-D4	02	02_F	NCC_15M	2	FALSE	L
2019B-D4-R16	2019B-D4	02	02_F	39_P	3	FALSE	L
2019B-D4-R16	2019B-D4	02	02_F	NCC_9M	4	FALSE	L
2019B-D4-R17	2019B-D4	02	02_F	O#12M	1	FALSE	L
2019B-D4-R17	2019B-D4	02	02_F	02_P	2	TRUE	L
2019B-D4-R17	2019B-D4	02	02_F	56_P	3	FALSE	L
2019B-D4-R17	2019B-D4	02	02_F	NCC_15M	4	FALSE	L
2019B-D4-R18	2019B-D4	02	02_F	45_P	1	FALSE	L
2019B-D4-R18	2019B-D4	02	02_F	O#12M	2	FALSE	L
2019B-D4-R18	2019B-D4	02	02_F	02_P	3	TRUE	L
2019B-D4-R18	2019B-D4	02	02_F	NCC_14M	4	FALSE	L
2019B-D4-R19	2019B-D4	02	02_F	56_P	1	FALSE	L
2019B-D4-R19	2019B-D4	02	02_F	02_P	2	TRUE	L
2019B-D4-R19	2019B-D4	02	02_F	NCC_13M	3	FALSE	L
2019B-D4-R19	2019B-D4	02	02_F	NCC_14M	4	FALSE	L
2019B-D4-R20	2019B-D4	02	02_F	02_P	1	TRUE	L
2019B-D4-R20	2019B-D4	02	02_F	45_P	2	FALSE	L
2019B-D4-R20	2019B-D4	02	02_F	NCC_15M	3	FALSE	L
2019B-D4-R20	2019B-D4	02	02_F	NCC_13M	4	FALSE	L
2020A-D5-2020-01-30-R1	2020A-D5	03	03_F	03_P	1	TRUE	R
2020A-D5-2020-01-30-R1	2020A-D5	03	03_F	JATR020419RY	2	FALSE	R
2020A-D5-2020-01-30-R1	2020A-D5	03	03_F	ROFA101219RY	3	FALSE	R
2020A-D5-2020-01-30-R1	2020A-D5	03	03_F	NCC_27M	4	FALSE	R
2020A-D5-2020-01-30-R5	2020A-D5	03	03_F	03_P	1	TRUE	R
2020A-D5-2020-01-30-R5	2020A-D5	03	03_F	DAFL090419RY	2	FALSE	R
2020A-D5-2020-01-30-R5	2020A-D5	03	03_F	TASO200120RY	3	FALSE	R
2020A-D5-2020-01-30-R5	2020A-D5	03	03_F	MOML221019RY	4	FALSE	R
2020A-D5-2020-01-30-R9	2020A-D5	03	03_F	NCC_15M	1	FALSE	R
2020A-D5-2020-01-30-R9	2020A-D5	03	03_F	03_P	2	TRUE	R
2020A-D5-2020-01-30-R9	2020A-D5	03	03_F	NCC_26M	3	FALSE	R
2020A-D5-2020-01-30-R9	2020A-D5	03	03_F	NCC_29M	4	FALSE	R
2020A-D5-2020-01-30-R14	2020A-D5	03	03_F	03_P	1	TRUE	R
2020A-D5-2020-01-30-R14	2020A-D5	03	03_F	NCC_27M	2	FALSE	R
2020A-D5-2020-01-30-R14	2020A-D5	03	03_F	20MDSP	3	FALSE	R
2020A-D5-2020-01-30-R14	2020A-D5	03	03_F	NCC_26M	4	FALSE	R
2020A-D5-2020-01-30-R3	2020A-D5	03	03_F	NCC_15M	1	FALSE	R
2020A-D5-2020-01-30-R3	2020A-D5	03	03_F	ROFA101219RY	2	FALSE	R
2020A-D5-2020-01-30-R3	2020A-D5	03	03_F	NCC_108M	3	FALSE	R
2020A-D5-2020-01-30-R3	2020A-D5	03	03_F	03_P	4	TRUE	R
2020A-D5-2020-01-30-R7	2020A-D5	03	03_F	JATR020419RY	1	FALSE	R
2020A-D5-2020-01-30-R7	2020A-D5	03	03_F	03_P	2	TRUE	R
2020A-D5-2020-01-30-R7	2020A-D5	03	03_F	NCC_27M	3	FALSE	R
2020A-D5-2020-01-30-R7	2020A-D5	03	03_F	NCC_30M	4	FALSE	R
2020A-D5-2020-01-30-R10	2020A-D5	03	03_F	03_P	1	TRUE	R
2020A-D5-2020-01-30-R10	2020A-D5	03	03_F	VARL151019RY	2	FALSE	R
2020A-D5-2020-01-30-R10	2020A-D5	03	03_F	NCC_108M	3	FALSE	R
2020A-D5-2020-01-30-R10	2020A-D5	03	03_F	NCC_29M	4	FALSE	R
2020A-D5-2020-01-30-R16	2020A-D5	03	03_F	NCC_27M	1	FALSE	R
2020A-D5-2020-01-30-R16	2020A-D5	03	03_F	03_P	2	TRUE	R
2020A-D5-2020-01-30-R16	2020A-D5	03	03_F	VARL151019RY	3	FALSE	R
2020A-D5-2020-01-30-R16	2020A-D5	03	03_F	NCC_29M	4	FALSE	R
2020A-D5-2020-01-30-R2	2020A-D5	03	03_F	03_P	1	TRUE	R
2020A-D5-2020-01-30-R2	2020A-D5	03	03_F	NCC_27M	2	FALSE	R
2020A-D5-2020-01-30-R2	2020A-D5	03	03_F	NCC_15M	3	FALSE	R
2020A-D5-2020-01-30-R2	2020A-D5	03	03_F	NCC_108M	4	FALSE	R
2020A-D5-2020-01-30-R4	2020A-D5	03	03_F	ZUHA191219RY	1	FALSE	R
2020A-D5-2020-01-30-R4	2020A-D5	03	03_F	03_P	2	TRUE	R
2020A-D5-2020-01-30-R4	2020A-D5	03	03_F	NCC_15M	3	FALSE	R
2020A-D5-2020-01-30-R4	2020A-D5	03	03_F	NCC_26M	4	FALSE	R
2020A-D5-2020-01-30-R12	2020A-D5	03	03_F	03_P	1	TRUE	R
2020A-D5-2020-01-30-R12	2020A-D5	03	03_F	NCC_15M	2	FALSE	R
2020A-D5-2020-01-30-R12	2020A-D5	03	03_F	TASO200120RY	3	FALSE	R
2020A-D5-2020-01-30-R12	2020A-D5	03	03_F	ROFA101219RY	4	FALSE	R
2020A-D5-2020-01-30-R15	2020A-D5	03	03_F	DAFL090419RY	1	FALSE	R
2020A-D5-2020-01-30-R15	2020A-D5	03	03_F	TASO200120RY	2	FALSE	R
2020A-D5-2020-01-30-R15	2020A-D5	03	03_F	03_P	3	TRUE	R
2020A-D5-2020-01-30-R15	2020A-D5	03	03_F	ROFA101219RY	4	FALSE	R
2020A-D5-2020-01-30-R20	2020A-D5	03	03_F	NCC_27M	1	FALSE	R
2020A-D5-2020-01-30-R20	2020A-D5	03	03_F	VARL151019RY	2	FALSE	R
2020A-D5-2020-01-30-R20	2020A-D5	03	03_F	03_P	3	TRUE	R
2020A-D5-2020-01-30-R20	2020A-D5	03	03_F	NCC_108M	4	FALSE	R
2020A-D5-2020-01-30-R21	2020A-D5	03	03_F	VARL151019RY	1	FALSE	R
2020A-D5-2020-01-30-R21	2020A-D5	03	03_F	03_P	2	TRUE	R
2020A-D5-2020-01-30-R21	2020A-D5	03	03_F	NCC_29M	3	FALSE	R
2020A-D5-2020-01-30-R21	2020A-D5	03	03_F	NCC_27M	4	FALSE	R
2020A-D5-2020-01-30-R6	2020A-D5	03	03_F	03_P	1	TRUE	R
2020A-D5-2020-01-30-R6	2020A-D5	03	03_F	NCC_32M	2	FALSE	R
2020A-D5-2020-01-30-R6	2020A-D5	03	03_F	VARL151019RY	3	FALSE	R
2020A-D5-2020-01-30-R6	2020A-D5	03	03_F	NCC_108M	4	FALSE	R
2020A-D5-2020-01-30-R8	2020A-D5	03	03_F	20MDSP	1	FALSE	R
2020A-D5-2020-01-30-R8	2020A-D5	03	03_F	03_P	2	TRUE	R
2020A-D5-2020-01-30-R8	2020A-D5	03	03_F	ROFA101219RY	3	FALSE	R
2020A-D5-2020-01-30-R8	2020A-D5	03	03_F	NCC_29M	4	FALSE	R
2020A-D5-2020-01-30-R11	2020A-D5	03	03_F	NCC_27M	1	FALSE	R
2020A-D5-2020-01-30-R11	2020A-D5	03	03_F	03_P	2	TRUE	R
2020A-D5-2020-01-30-R11	2020A-D5	03	03_F	20MDSP	3	FALSE	R
2020A-D5-2020-01-30-R11	2020A-D5	03	03_F	NCC_26M	4	FALSE	R
2020A-D5-2020-01-30-R13	2020A-D5	03	03_F	DAFL090419RY	1	FALSE	R
2020A-D5-2020-01-30-R13	2020A-D5	03	03_F	NCC_32M	2	FALSE	R
2020A-D5-2020-01-30-R13	2020A-D5	03	03_F	03_P	3	TRUE	R
2020A-D5-2020-01-30-R13	2020A-D5	03	03_F	NCC_26M	4	FALSE	R
2020A-D5-2020-01-30-R17	2020A-D5	03	03_F	03_P	1	TRUE	R
2020A-D5-2020-01-30-R17	2020A-D5	03	03_F	ZUHA191219RY	2	FALSE	R
2020A-D5-2020-01-30-R17	2020A-D5	03	03_F	NCC_15M	3	FALSE	R
2020A-D5-2020-01-30-R17	2020A-D5	03	03_F	NCC_29M	4	FALSE	R
2020A-D5-2020-01-30-R18	2020A-D5	03	03_F	VARL151019RY	1	FALSE	R
2020A-D5-2020-01-30-R18	2020A-D5	03	03_F	03_P	2	TRUE	R
2020A-D5-2020-01-30-R18	2020A-D5	03	03_F	TASO200120RY	3	FALSE	R
2020A-D5-2020-01-30-R18	2020A-D5	03	03_F	ROFA101219RY	4	FALSE	R
2020A-D5-2020-01-30-R19	2020A-D5	03	03_F	NCC_108M	1	FALSE	R
2020A-D5-2020-01-30-R19	2020A-D5	03	03_F	NCC_32M	2	FALSE	R
2020A-D5-2020-01-30-R19	2020A-D5	03	03_F	03_P	3	TRUE	R
2020A-D5-2020-01-30-R19	2020A-D5	03	03_F	20MDSP	4	FALSE	R
2020A-D5-2020-01-30-R22	2020A-D5	03	03_F	03_P	1	TRUE	R
2020A-D5-2020-01-30-R22	2020A-D5	03	03_F	JATR020419RY	2	FALSE	R
2020A-D5-2020-01-30-R22	2020A-D5	03	03_F	NCC_29M	3	FALSE	R
2020A-D5-2020-01-30-R22	2020A-D5	03	03_F	ZUHA191219RY	4	FALSE	R
2019B-D1-R1	2019B-D1	04	04_F	04_P	1	TRUE	R
2019B-D1-R1	2019B-D1	04	04_F	NCC_1M	2	FALSE	R
2019B-D1-R1	2019B-D1	04	04_F	14MDS	3	FALSE	R
2019B-D1-R1	2019B-D1	04	04_F	4MDSP	4	FALSE	R
2019B-D1-R2	2019B-D1	04	04_F	04_P	1	TRUE	R
2019B-D1-R2	2019B-D1	04	04_F	NCC_4M	2	FALSE	R
2019B-D1-R2	2019B-D1	04	04_F	1MDSP	3	FALSE	R
2019B-D1-R2	2019B-D1	04	04_F	13MDS	4	FALSE	R
2019B-D1-R3	2019B-D1	04	04_F	04_P	1	TRUE	R
2019B-D1-R3	2019B-D1	04	04_F	12MDS	2	FALSE	R
2019B-D1-R3	2019B-D1	04	04_F	2MDSP	3	FALSE	R
2019B-D1-R3	2019B-D1	04	04_F	13MDS	4	FALSE	R
2019B-D1-R4	2019B-D1	04	04_F	5MDSP	1	FALSE	R
2019B-D1-R4	2019B-D1	04	04_F	O#3M	2	FALSE	R
2019B-D1-R4	2019B-D1	04	04_F	04_P	3	TRUE	R
2019B-D1-R4	2019B-D1	04	04_F	13MDS	4	FALSE	R
2019B-D1-R5	2019B-D1	04	04_F	12MDS	1	FALSE	R
2019B-D1-R5	2019B-D1	04	04_F	1MDSP	2	FALSE	R
2019B-D1-R5	2019B-D1	04	04_F	NCC_1M	3	FALSE	R
2019B-D1-R5	2019B-D1	04	04_F	04_P	4	TRUE	R
2019B-D1-R6	2019B-D1	04	04_F	04_P	1	TRUE	R
2019B-D1-R6	2019B-D1	04	04_F	NCC_4M	2	FALSE	R
2019B-D1-R6	2019B-D1	04	04_F	NCC_5M	3	FALSE	R
2019B-D1-R6	2019B-D1	04	04_F	2MDSP	4	FALSE	R
2019B-D1-R7	2019B-D1	04	04_F	04_P	1	TRUE	R
2019B-D1-R7	2019B-D1	04	04_F	NCC_2M	2	FALSE	R
2019B-D1-R7	2019B-D1	04	04_F	12MDS	3	FALSE	R
2019B-D1-R7	2019B-D1	04	04_F	3MDSP	4	FALSE	R
2019B-D1-R8	2019B-D1	04	04_F	04_P	1	TRUE	R
2019B-D1-R8	2019B-D1	04	04_F	12MDS	2	FALSE	R
2019B-D1-R8	2019B-D1	04	04_F	1MDSP	3	FALSE	R
2019B-D1-R8	2019B-D1	04	04_F	NCC_1M	4	FALSE	R
2019B-D1-R9	2019B-D1	04	04_F	NCC_4M	1	FALSE	R
2019B-D1-R9	2019B-D1	04	04_F	04_P	2	TRUE	R
2019B-D1-R9	2019B-D1	04	04_F	NCC_5M	3	FALSE	R
2019B-D1-R9	2019B-D1	04	04_F	3MDSP	4	FALSE	R
2019B-D1-R10	2019B-D1	04	04_F	04_P	1	TRUE	R
2019B-D1-R10	2019B-D1	04	04_F	NCC_1M	2	FALSE	R
2019B-D1-R10	2019B-D1	04	04_F	5MDSP	3	FALSE	R
2019B-D1-R10	2019B-D1	04	04_F	13MDS	4	FALSE	R
2019B-D1-R11	2019B-D1	04	04_F	NCC_23M	1	FALSE	R
2019B-D1-R11	2019B-D1	04	04_F	04_P	2	TRUE	R
2019B-D1-R11	2019B-D1	04	04_F	2MDSP	3	FALSE	R
2019B-D1-R11	2019B-D1	04	04_F	13MDS	4	FALSE	R
2019B-D1-R12	2019B-D1	04	04_F	NCC_5M	1	FALSE	R
2019B-D1-R12	2019B-D1	04	04_F	NCC_4M	2	FALSE	R
2019B-D1-R12	2019B-D1	04	04_F	04_P	3	TRUE	R
2019B-D1-R12	2019B-D1	04	04_F	5MDSP	4	FALSE	R
2019B-D1-R13	2019B-D1	04	04_F	04_P	1	TRUE	R
2019B-D1-R13	2019B-D1	04	04_F	O#3M	2	FALSE	R
2019B-D1-R13	2019B-D1	04	04_F	1MDSP	3	FALSE	R
2019B-D1-R13	2019B-D1	04	04_F	NCC_2M	4	FALSE	R
2019B-D1-R14	2019B-D1	04	04_F	04_P	1	TRUE	R
2019B-D1-R14	2019B-D1	04	04_F	5MDSP	2	FALSE	R
2019B-D1-R14	2019B-D1	04	04_F	O#3M	3	FALSE	R
2019B-D1-R14	2019B-D1	04	04_F	NCC_1M	4	FALSE	R
2019B-D1-R15	2019B-D1	04	04_F	04_P	1	TRUE	R
2019B-D1-R15	2019B-D1	04	04_F	5MDSP	2	FALSE	R
2019B-D1-R15	2019B-D1	04	04_F	NCC_1M	3	FALSE	R
2019B-D1-R15	2019B-D1	04	04_F	13MDS	4	FALSE	R
2019B-D1-R16	2019B-D1	04	04_F	04_P	1	TRUE	R
2019B-D1-R16	2019B-D1	04	04_F	NCC_23M	2	FALSE	R
2019B-D1-R16	2019B-D1	04	04_F	13MDS	3	FALSE	R
2019B-D1-R16	2019B-D1	04	04_F	4MDSP	4	FALSE	R
2019B-D1-R17	2019B-D1	04	04_F	5MDSP	1	FALSE	R
2019B-D1-R17	2019B-D1	04	04_F	04_P	2	TRUE	R
2019B-D1-R17	2019B-D1	04	04_F	NCC_23M	3	FALSE	R
2019B-D1-R17	2019B-D1	04	04_F	13MDS	4	FALSE	R
2019B-D1-R18	2019B-D1	04	04_F	2MDSP	1	FALSE	R
2019B-D1-R18	2019B-D1	04	04_F	O#3M	2	FALSE	R
2019B-D1-R18	2019B-D1	04	04_F	04_P	3	TRUE	R
2019B-D1-R18	2019B-D1	04	04_F	NCC_1M	4	FALSE	R
2019B-D1-R19	2019B-D1	04	04_F	5MDSP	1	FALSE	R
2019B-D1-R19	2019B-D1	04	04_F	NCC_4M	2	FALSE	R
2019B-D1-R19	2019B-D1	04	04_F	04_P	3	TRUE	R
2019B-D1-R19	2019B-D1	04	04_F	NCC_1M	4	FALSE	R
2019B-D1-R20	2019B-D1	04	04_F	04_P	1	TRUE	R
2019B-D1-R20	2019B-D1	04	04_F	3MDSP	2	FALSE	R
2019B-D1-R20	2019B-D1	04	04_F	13MDS	3	FALSE	R
2019B-D1-R20	2019B-D1	04	04_F	NCC_3M	4	FALSE	R
2019B-D1-R21	2019B-D1	04	04_F	04_P	1	TRUE	R
2019B-D1-R21	2019B-D1	04	04_F	2MDSP	2	FALSE	R
2019B-D1-R21	2019B-D1	04	04_F	12MDS	3	FALSE	R
2019B-D1-R21	2019B-D1	04	04_F	14MDS	4	FALSE	R
2019B-D1-R22	2019B-D1	04	04_F	NCC_5M	1	FALSE	R
2019B-D1-R22	2019B-D1	04	04_F	04_P	2	TRUE	R
2019B-D1-R22	2019B-D1	04	04_F	2MDSP	3	FALSE	R
2019B-D1-R22	2019B-D1	04	04_F	NCC_3M	4	FALSE	R
2019B-D1-R1	2019B-D1	05	05_F	O#3M	1	FALSE	R
2019B-D1-R1	2019B-D1	05	05_F	05_P	2	TRUE	R
2019B-D1-R1	2019B-D1	05	05_F	3MDSP	3	FALSE	R
2019B-D1-R1	2019B-D1	05	05_F	NCC_23M	4	FALSE	R
2019B-D1-R2	2019B-D1	05	05_F	05_P	1	TRUE	R
2019B-D1-R2	2019B-D1	05	05_F	3MDSP	2	FALSE	R
2019B-D1-R2	2019B-D1	05	05_F	NCC_5M	3	FALSE	R
2019B-D1-R2	2019B-D1	05	05_F	NCC_3M	4	FALSE	R
2019B-D1-R3	2019B-D1	05	05_F	3MDSP	1	FALSE	R
2019B-D1-R3	2019B-D1	05	05_F	NCC_5M	2	FALSE	R
2019B-D1-R3	2019B-D1	05	05_F	NCC_3M	3	FALSE	R
2019B-D1-R3	2019B-D1	05	05_F	05_P	4	TRUE	R
2019B-D1-R4	2019B-D1	05	05_F	NCC_2M	1	FALSE	R
2019B-D1-R4	2019B-D1	05	05_F	05_P	2	TRUE	R
2019B-D1-R4	2019B-D1	05	05_F	2MDSP	3	FALSE	R
2019B-D1-R4	2019B-D1	05	05_F	12MDS	4	FALSE	R
2019B-D1-R5	2019B-D1	05	05_F	NCC_4M	1	FALSE	R
2019B-D1-R5	2019B-D1	05	05_F	05_P	2	TRUE	R
2019B-D1-R5	2019B-D1	05	05_F	NCC_5M	3	FALSE	R
2019B-D1-R5	2019B-D1	05	05_F	3MDSP	4	FALSE	R
2019B-D1-R6	2019B-D1	05	05_F	4MDSP	1	FALSE	R
2019B-D1-R6	2019B-D1	05	05_F	O#3M	2	FALSE	R
2019B-D1-R6	2019B-D1	05	05_F	14MDS	3	FALSE	R
2019B-D1-R6	2019B-D1	05	05_F	05_P	4	TRUE	R
2019B-D1-R7	2019B-D1	05	05_F	NCC_4M	1	FALSE	R
2019B-D1-R7	2019B-D1	05	05_F	NCC_23M	2	FALSE	R
2019B-D1-R7	2019B-D1	05	05_F	1MDSP	3	FALSE	R
2019B-D1-R7	2019B-D1	05	05_F	05_P	4	TRUE	R
2019B-D1-R8	2019B-D1	05	05_F	O#3M	1	FALSE	R
2019B-D1-R8	2019B-D1	05	05_F	3MDSP	2	FALSE	R
2019B-D1-R8	2019B-D1	05	05_F	14MDS	3	FALSE	R
2019B-D1-R8	2019B-D1	05	05_F	05_P	4	TRUE	R
2019B-D1-R9	2019B-D1	05	05_F	NCC_23M	1	FALSE	R
2019B-D1-R9	2019B-D1	05	05_F	05_P	2	TRUE	R
2019B-D1-R9	2019B-D1	05	05_F	14MDS	3	FALSE	R
2019B-D1-R9	2019B-D1	05	05_F	4MDSP	4	FALSE	R
2019B-D1-R10	2019B-D1	05	05_F	14MDS	1	FALSE	R
2019B-D1-R10	2019B-D1	05	05_F	2MDSP	2	FALSE	R
2019B-D1-R10	2019B-D1	05	05_F	NCC_3M	3	FALSE	R
2019B-D1-R10	2019B-D1	05	05_F	05_P	4	TRUE	R
2019B-D1-R11	2019B-D1	05	05_F	NCC_2M	1	FALSE	R
2019B-D1-R11	2019B-D1	05	05_F	O#3M	2	FALSE	R
2019B-D1-R11	2019B-D1	05	05_F	5MDSP	3	FALSE	R
2019B-D1-R11	2019B-D1	05	05_F	05_P	4	TRUE	R
2019B-D1-R12	2019B-D1	05	05_F	14MDS	1	FALSE	R
2019B-D1-R12	2019B-D1	05	05_F	13MDS	2	FALSE	R
2019B-D1-R12	2019B-D1	05	05_F	3MDSP	3	FALSE	R
2019B-D1-R12	2019B-D1	05	05_F	05_P	4	TRUE	R
2019B-D1-R13	2019B-D1	05	05_F	12MDS	1	FALSE	R
2019B-D1-R13	2019B-D1	05	05_F	05_P	2	TRUE	R
2019B-D1-R13	2019B-D1	05	05_F	4MDSP	3	FALSE	R
2019B-D1-R13	2019B-D1	05	05_F	NCC_1M	4	FALSE	R
2019B-D1-R14	2019B-D1	05	05_F	12MDS	1	FALSE	R
2019B-D1-R14	2019B-D1	05	05_F	13MDS	2	FALSE	R
2019B-D1-R14	2019B-D1	05	05_F	05_P	3	TRUE	R
2019B-D1-R14	2019B-D1	05	05_F	1MDSP	4	FALSE	R
2019B-D1-R15	2019B-D1	05	05_F	NCC_4M	1	FALSE	R
2019B-D1-R15	2019B-D1	05	05_F	05_P	2	TRUE	R
2019B-D1-R15	2019B-D1	05	05_F	1MDSP	3	FALSE	R
2019B-D1-R15	2019B-D1	05	05_F	NCC_5M	4	FALSE	R
2019B-D1-R16	2019B-D1	05	05_F	14MDS	1	FALSE	R
2019B-D1-R16	2019B-D1	05	05_F	NCC_2M	2	FALSE	R
2019B-D1-R16	2019B-D1	05	05_F	05_P	3	TRUE	R
2019B-D1-R16	2019B-D1	05	05_F	5MDSP	4	FALSE	R
2019B-D1-R17	2019B-D1	05	05_F	12MDS	1	FALSE	R
2019B-D1-R17	2019B-D1	05	05_F	05_P	2	TRUE	R
2019B-D1-R17	2019B-D1	05	05_F	NCC_3M	3	FALSE	R
2019B-D1-R17	2019B-D1	05	05_F	4MDSP	4	FALSE	R
2019B-D1-R18	2019B-D1	05	05_F	14MDS	1	FALSE	R
2019B-D1-R18	2019B-D1	05	05_F	05_P	2	TRUE	R
2019B-D1-R18	2019B-D1	05	05_F	5MDSP	3	FALSE	R
2019B-D1-R18	2019B-D1	05	05_F	NCC_5M	4	FALSE	R
2019B-D1-R19	2019B-D1	05	05_F	05_P	1	TRUE	R
2019B-D1-R19	2019B-D1	05	05_F	NCC_2M	2	FALSE	R
2019B-D1-R19	2019B-D1	05	05_F	2MDSP	3	FALSE	R
2019B-D1-R19	2019B-D1	05	05_F	NCC_5M	4	FALSE	R
2019B-D1-R20	2019B-D1	05	05_F	NCC_2M	1	FALSE	R
2019B-D1-R20	2019B-D1	05	05_F	NCC_23M	2	FALSE	R
2019B-D1-R20	2019B-D1	05	05_F	1MDSP	3	FALSE	R
2019B-D1-R20	2019B-D1	05	05_F	05_P	4	TRUE	R
2019B-D1-R21	2019B-D1	05	05_F	NCC_3M	1	FALSE	R
2019B-D1-R21	2019B-D1	05	05_F	5MDSP	2	FALSE	R
2019B-D1-R21	2019B-D1	05	05_F	NCC_2M	3	FALSE	R
2019B-D1-R21	2019B-D1	05	05_F	05_P	4	TRUE	R
2019B-D1-R22	2019B-D1	05	05_F	O#3M	1	FALSE	R
2019B-D1-R22	2019B-D1	05	05_F	14MDS	2	FALSE	R
2019B-D1-R22	2019B-D1	05	05_F	4MDSP	3	FALSE	R
2019B-D1-R22	2019B-D1	05	05_F	05_P	4	TRUE	R
2018A-53F050618	2018A-D3	06	06_F	06_P	1	TRUE	R
2018A-53F050618	2018A-D3	06	06_F	08_P	4	FALSE	R
2018A-53F050618	2018A-D3	06	06_F	NCC_52M	3	FALSE	R
2018A-53F050618	2018A-D3	06	06_F	NCC_61M	2	FALSE	R
2018A-54F050618	2018A-D3	06	06_F	06_P	1	TRUE	R
2018A-54F050618	2018A-D3	06	06_F	08_P	2	FALSE	R
2018A-54F050618	2018A-D3	06	06_F	NCC_52M	4	FALSE	R
2018A-54F050618	2018A-D3	06	06_F	NCC_61M	3	FALSE	R
2018A-55F050618	2018A-D3	06	06_F	06_P	4	TRUE	R
2018A-55F050618	2018A-D3	06	06_F	08_P	1	FALSE	R
2018A-55F050618	2018A-D3	06	06_F	NCC_52M	3	FALSE	R
2018A-55F050618	2018A-D3	06	06_F	NCC_61M	2	FALSE	R
2018A-56F050618	2018A-D3	06	06_F	06_P	1	TRUE	R
2018A-56F050618	2018A-D3	06	06_F	08_P	2	FALSE	R
2018A-56F050618	2018A-D3	06	06_F	NCC_52M	4	FALSE	R
2018A-56F050618	2018A-D3	06	06_F	NCC_61M	3	FALSE	R
2018A-57F050618	2018A-D3	06	06_F	06_P	1	TRUE	R
2018A-57F050618	2018A-D3	06	06_F	08_P	2	FALSE	R
2018A-57F050618	2018A-D3	06	06_F	NCC_52M	4	FALSE	R
2018A-57F050618	2018A-D3	06	06_F	NCC_61M	3	FALSE	R
2018A-58F050618	2018A-D3	06	06_F	06_P	2	TRUE	R
2018A-58F050618	2018A-D3	06	06_F	08_P	1	FALSE	R
2018A-58F050618	2018A-D3	06	06_F	NCC_52M	4	FALSE	R
2018A-58F050618	2018A-D3	06	06_F	NCC_61M	3	FALSE	R
2018A-59F050618	2018A-D3	06	06_F	06_P	1	TRUE	R
2018A-59F050618	2018A-D3	06	06_F	08_P	2	FALSE	R
2018A-59F050618	2018A-D3	06	06_F	NCC_52M	4	FALSE	R
2018A-59F050618	2018A-D3	06	06_F	NCC_61M	3	FALSE	R
2018A-60F050618	2018A-D3	06	06_F	06_P	1	TRUE	R
2018A-60F050618	2018A-D3	06	06_F	08_P	2	FALSE	R
2018A-60F050618	2018A-D3	06	06_F	NCC_52M	4	FALSE	R
2018A-60F050618	2018A-D3	06	06_F	NCC_61M	3	FALSE	R
2018A-61F050618	2018A-D3	06	06_F	06_P	2	TRUE	R
2018A-61F050618	2018A-D3	06	06_F	08_P	1	FALSE	R
2018A-61F050618	2018A-D3	06	06_F	NCC_52M	4	FALSE	R
2018A-61F050618	2018A-D3	06	06_F	NCC_61M	3	FALSE	R
2018A-62F050618	2018A-D3	06	06_F	06_P	1	TRUE	R
2018A-62F050618	2018A-D3	06	06_F	08_P	2	FALSE	R
2018A-62F050618	2018A-D3	06	06_F	NCC_52M	4	FALSE	R
2018A-62F050618	2018A-D3	06	06_F	NCC_61M	3	FALSE	R
2018A-63F050618	2018A-D3	06	06_F	06_P	1	TRUE	R
2018A-63F050618	2018A-D3	06	06_F	08_P	3	FALSE	R
2018A-63F050618	2018A-D3	06	06_F	NCC_52M	2	FALSE	R
2018A-63F050618	2018A-D3	06	06_F	NCC_61M	4	FALSE	R
2018A-64F050618	2018A-D3	06	06_F	06_P	2	TRUE	R
2018A-64F050618	2018A-D3	06	06_F	08_P	4	FALSE	R
2018A-64F050618	2018A-D3	06	06_F	NCC_52M	1	FALSE	R
2018A-64F050618	2018A-D3	06	06_F	NCC_61M	3	FALSE	R
2018A-65F050618	2018A-D3	06	06_F	06_P	1	TRUE	R
2018A-65F050618	2018A-D3	06	06_F	08_P	2	FALSE	R
2018A-65F050618	2018A-D3	06	06_F	NCC_52M	4	FALSE	R
2018A-65F050618	2018A-D3	06	06_F	NCC_61M	3	FALSE	R
2018A-66F050618	2018A-D3	06	06_F	06_P	2	TRUE	R
2018A-66F050618	2018A-D3	06	06_F	08_P	1	FALSE	R
2018A-66F050618	2018A-D3	06	06_F	NCC_52M	4	FALSE	R
2018A-66F050618	2018A-D3	06	06_F	NCC_61M	3	FALSE	R
2018A-67F050618	2018A-D3	06	06_F	06_P	2	TRUE	R
2018A-67F050618	2018A-D3	06	06_F	08_P	1	FALSE	R
2018A-67F050618	2018A-D3	06	06_F	NCC_52M	3	FALSE	R
2018A-67F050618	2018A-D3	06	06_F	NCC_61M	4	FALSE	R
2018A-68F050618	2018A-D3	06	06_F	06_P	1	TRUE	R
2018A-68F050618	2018A-D3	06	06_F	08_P	2	FALSE	R
2018A-68F050618	2018A-D3	06	06_F	NCC_52M	4	FALSE	R
2018A-68F050618	2018A-D3	06	06_F	NCC_61M	3	FALSE	R
2018A-69F050618	2018A-D3	06	06_F	06_P	1	TRUE	R
2018A-69F050618	2018A-D3	06	06_F	08_P	2	FALSE	R
2018A-69F050618	2018A-D3	06	06_F	NCC_52M	3	FALSE	R
2018A-69F050618	2018A-D3	06	06_F	NCC_61M	4	FALSE	R
2018A-70F050618	2018A-D3	06	06_F	06_P	2	TRUE	R
2018A-70F050618	2018A-D3	06	06_F	08_P	1	FALSE	R
2018A-70F050618	2018A-D3	06	06_F	NCC_52M	4	FALSE	R
2018A-70F050618	2018A-D3	06	06_F	NCC_61M	3	FALSE	R
2018A-71F050618	2018A-D3	06	06_F	06_P	2	TRUE	R
2018A-71F050618	2018A-D3	06	06_F	08_P	1	FALSE	R
2018A-71F050618	2018A-D3	06	06_F	NCC_52M	4	FALSE	R
2018A-71F050618	2018A-D3	06	06_F	NCC_61M	3	FALSE	R
2018A-72F050618	2018A-D3	06	06_F	06_P	2	TRUE	R
2018A-72F050618	2018A-D3	06	06_F	08_P	1	FALSE	R
2018A-72F050618	2018A-D3	06	06_F	NCC_52M	3	FALSE	R
2018A-72F050618	2018A-D3	06	06_F	NCC_61M	4	FALSE	R
2018A-73F050618	2018A-D3	06	06_F	06_P	1	TRUE	R
2018A-73F050618	2018A-D3	06	06_F	08_P	2	FALSE	R
2018A-73F050618	2018A-D3	06	06_F	NCC_52M	3	FALSE	R
2018A-73F050618	2018A-D3	06	06_F	NCC_61M	4	FALSE	R
2018A-74F050618	2018A-D3	06	06_F	06_P	1	TRUE	R
2018A-74F050618	2018A-D3	06	06_F	08_P	2	FALSE	R
2018A-74F050618	2018A-D3	06	06_F	NCC_52M	3	FALSE	R
2018A-74F050618	2018A-D3	06	06_F	NCC_61M	4	FALSE	R
2018A-75F050618	2018A-D3	06	06_F	06_P	1	TRUE	R
2018A-75F050618	2018A-D3	06	06_F	08_P	2	FALSE	R
2018A-75F050618	2018A-D3	06	06_F	NCC_52M	3	FALSE	R
2018A-75F050618	2018A-D3	06	06_F	NCC_61M	4	FALSE	R
2018A-76F050618	2018A-D3	06	06_F	06_P	1	TRUE	R
2018A-76F050618	2018A-D3	06	06_F	08_P	3	FALSE	R
2018A-76F050618	2018A-D3	06	06_F	NCC_52M	2	FALSE	R
2018A-76F050618	2018A-D3	06	06_F	NCC_61M	4	FALSE	R
2018A-77F050618	2018A-D3	06	06_F	06_P	2	TRUE	R
2018A-77F050618	2018A-D3	06	06_F	08_P	1	FALSE	R
2018A-77F050618	2018A-D3	06	06_F	NCC_52M	3	FALSE	R
2018A-77F050618	2018A-D3	06	06_F	NCC_61M	4	FALSE	R
2019B-D3-R1	2019B-D3	07	07_F	9MDS	1	FALSE	R
2019B-D3-R1	2019B-D3	07	07_F	07_P	2	TRUE	R
2019B-D3-R1	2019B-D3	07	07_F	34_P	3	FALSE	R
2019B-D3-R1	2019B-D3	07	07_F	O#12M	4	FALSE	R
2019B-D3-R2	2019B-D3	07	07_F	NCC_24M	1	FALSE	R
2019B-D3-R2	2019B-D3	07	07_F	40_P	2	FALSE	R
2019B-D3-R2	2019B-D3	07	07_F	07_P	3	TRUE	R
2019B-D3-R2	2019B-D3	07	07_F	O#12M	4	FALSE	R
2019B-D3-R3	2019B-D3	07	07_F	07_P	1	TRUE	R
2019B-D3-R3	2019B-D3	07	07_F	NCC_24M	2	FALSE	R
2019B-D3-R3	2019B-D3	07	07_F	48_P	3	FALSE	R
2019B-D3-R3	2019B-D3	07	07_F	NCC_22M	4	FALSE	R
2019B-D3-R4	2019B-D3	07	07_F	07_P	1	TRUE	R
2019B-D3-R4	2019B-D3	07	07_F	10MDS	2	FALSE	R
2019B-D3-R4	2019B-D3	07	07_F	NCC_7M	3	FALSE	R
2019B-D3-R4	2019B-D3	07	07_F	34_P	4	FALSE	R
2019B-D3-R5	2019B-D3	07	07_F	NCC_24M	1	FALSE	R
2019B-D3-R5	2019B-D3	07	07_F	37_P	2	FALSE	R
2019B-D3-R5	2019B-D3	07	07_F	NCC_9M	3	FALSE	R
2019B-D3-R5	2019B-D3	07	07_F	07_P	4	TRUE	R
2019B-D3-R6	2019B-D3	07	07_F	07_P	1	TRUE	R
2019B-D3-R6	2019B-D3	07	07_F	NCC_9M	2	FALSE	R
2019B-D3-R6	2019B-D3	07	07_F	NCC_7M	3	FALSE	R
2019B-D3-R6	2019B-D3	07	07_F	48_P	4	FALSE	R
2019B-D3-R7	2019B-D3	07	07_F	07_P	1	TRUE	R
2019B-D3-R7	2019B-D3	07	07_F	NCC_24M	2	FALSE	R
2019B-D3-R7	2019B-D3	07	07_F	01_P	3	FALSE	R
2019B-D3-R7	2019B-D3	07	07_F	11MDS	4	FALSE	R
2019B-D3-R8	2019B-D3	07	07_F	07_P	1	TRUE	R
2019B-D3-R8	2019B-D3	07	07_F	NCC_6M	2	FALSE	R
2019B-D3-R8	2019B-D3	07	07_F	NCC_9M	3	FALSE	R
2019B-D3-R8	2019B-D3	07	07_F	34_P	4	FALSE	R
2019B-D3-R9	2019B-D3	07	07_F	07_P	1	TRUE	R
2019B-D3-R9	2019B-D3	07	07_F	NCC_7M	2	FALSE	R
2019B-D3-R9	2019B-D3	07	07_F	11MDS	3	FALSE	R
2019B-D3-R9	2019B-D3	07	07_F	34_P	4	FALSE	R
2019B-D3-R10	2019B-D3	07	07_F	07_P	1	TRUE	R
2019B-D3-R10	2019B-D3	07	07_F	10MDS	2	FALSE	R
2019B-D3-R10	2019B-D3	07	07_F	NCC_9M	3	FALSE	R
2019B-D3-R10	2019B-D3	07	07_F	48_P	4	FALSE	R
2019B-D3-R11	2019B-D3	07	07_F	11MDS	1	FALSE	R
2019B-D3-R11	2019B-D3	07	07_F	07_P	2	TRUE	R
2019B-D3-R11	2019B-D3	07	07_F	NCC_6M	3	FALSE	R
2019B-D3-R11	2019B-D3	07	07_F	40_P	4	FALSE	R
2019B-D3-R12	2019B-D3	07	07_F	07_P	1	TRUE	R
2019B-D3-R12	2019B-D3	07	07_F	O#12M	2	FALSE	R
2019B-D3-R12	2019B-D3	07	07_F	01_P	3	FALSE	R
2019B-D3-R12	2019B-D3	07	07_F	NCC_7M	4	FALSE	R
2019B-D3-R13	2019B-D3	07	07_F	07_P	1	TRUE	R
2019B-D3-R13	2019B-D3	07	07_F	NCC_6M	2	FALSE	R
2019B-D3-R13	2019B-D3	07	07_F	NCC_22M	3	FALSE	R
2019B-D3-R13	2019B-D3	07	07_F	40_P	4	FALSE	R
2019B-D3-R14	2019B-D3	07	07_F	01_P	1	FALSE	R
2019B-D3-R14	2019B-D3	07	07_F	NCC_6M	2	FALSE	R
2019B-D3-R14	2019B-D3	07	07_F	07_P	3	TRUE	R
2019B-D3-R14	2019B-D3	07	07_F	NCC_22M	4	FALSE	R
2019B-D3-R15	2019B-D3	07	07_F	07_P	1	TRUE	R
2019B-D3-R15	2019B-D3	07	07_F	10MDS	2	FALSE	R
2019B-D3-R15	2019B-D3	07	07_F	34_P	3	FALSE	R
2019B-D3-R15	2019B-D3	07	07_F	9MDS	4	FALSE	R
2019B-D3-R16	2019B-D3	07	07_F	NCC_7M	1	FALSE	R
2019B-D3-R16	2019B-D3	07	07_F	07_P	2	TRUE	R
2019B-D3-R16	2019B-D3	07	07_F	40_P	3	FALSE	R
2019B-D3-R16	2019B-D3	07	07_F	10MDS	4	FALSE	R
2019B-D3-R17	2019B-D3	07	07_F	NCC_9M	1	FALSE	R
2019B-D3-R17	2019B-D3	07	07_F	07_P	2	TRUE	R
2019B-D3-R17	2019B-D3	07	07_F	48_P	3	FALSE	R
2019B-D3-R17	2019B-D3	07	07_F	NCC_6M	4	FALSE	R
2019B-D3-R18	2019B-D3	07	07_F	O#12M	1	FALSE	R
2019B-D3-R18	2019B-D3	07	07_F	07_P	2	TRUE	R
2019B-D3-R18	2019B-D3	07	07_F	37_P	3	FALSE	R
2019B-D3-R18	2019B-D3	07	07_F	NCC_22M	4	FALSE	R
2019B-D3-R19	2019B-D3	07	07_F	07_P	1	TRUE	R
2019B-D3-R19	2019B-D3	07	07_F	48_P	2	FALSE	R
2019B-D3-R19	2019B-D3	07	07_F	NCC_22M	3	FALSE	R
2019B-D3-R19	2019B-D3	07	07_F	NCC_9M	4	FALSE	R
2019B-D3-R20	2019B-D3	07	07_F	07_P	1	TRUE	R
2019B-D3-R20	2019B-D3	07	07_F	40_P	2	FALSE	R
2019B-D3-R20	2019B-D3	07	07_F	9MDS	3	FALSE	R
2019B-D3-R20	2019B-D3	07	07_F	NCC_9M	4	FALSE	R
2019B-D3-R21	2019B-D3	07	07_F	07_P	1	TRUE	R
2019B-D3-R21	2019B-D3	07	07_F	NCC_8M	2	FALSE	R
2019B-D3-R21	2019B-D3	07	07_F	40_P	3	FALSE	R
2019B-D3-R21	2019B-D3	07	07_F	10MDS	4	FALSE	R
2019B-D3-R22	2019B-D3	07	07_F	48_P	1	FALSE	R
2019B-D3-R22	2019B-D3	07	07_F	07_P	2	TRUE	R
2019B-D3-R22	2019B-D3	07	07_F	O#12M	3	FALSE	R
2019B-D3-R22	2019B-D3	07	07_F	9MDS	4	FALSE	R
2019B-D3-R23	2019B-D3	07	07_F	07_P	1	TRUE	R
2019B-D3-R23	2019B-D3	07	07_F	01_P	2	FALSE	R
2019B-D3-R23	2019B-D3	07	07_F	NCC_8M	3	FALSE	R
2019B-D3-R23	2019B-D3	07	07_F	9MDS	4	FALSE	R
2019B-D3-R24	2019B-D3	07	07_F	07_P	1	TRUE	R
2019B-D3-R24	2019B-D3	07	07_F	O#12M	2	FALSE	R
2019B-D3-R24	2019B-D3	07	07_F	01_P	3	FALSE	R
2019B-D3-R24	2019B-D3	07	07_F	NCC_8M	4	FALSE	R
2018A-78F060618	2018A-D4	08	08_F	08_P	4	TRUE	L
2018A-78F060618	2018A-D4	08	08_F	12_P	3	FALSE	L
2018A-78F060618	2018A-D4	08	08_F	NCC_55M	2	FALSE	L
2018A-78F060618	2018A-D4	08	08_F	NCC_44M	1	FALSE	L
2018A-79F060618	2018A-D4	08	08_F	08_P	4	TRUE	L
2018A-79F060618	2018A-D4	08	08_F	12_P	1	FALSE	L
2018A-79F060618	2018A-D4	08	08_F	NCC_55M	3	FALSE	L
2018A-79F060618	2018A-D4	08	08_F	NCC_44M	2	FALSE	L
2018A-80F060618	2018A-D4	08	08_F	08_P	2	TRUE	L
2018A-80F060618	2018A-D4	08	08_F	12_P	3	FALSE	L
2018A-80F060618	2018A-D4	08	08_F	NCC_55M	4	FALSE	L
2018A-80F060618	2018A-D4	08	08_F	NCC_44M	1	FALSE	L
2018A-81F060618	2018A-D4	08	08_F	08_P	1	TRUE	L
2018A-81F060618	2018A-D4	08	08_F	12_P	2	FALSE	L
2018A-81F060618	2018A-D4	08	08_F	NCC_55M	4	FALSE	L
2018A-81F060618	2018A-D4	08	08_F	NCC_44M	3	FALSE	L
2018A-82F060618	2018A-D4	08	08_F	08_P	1	TRUE	L
2018A-82F060618	2018A-D4	08	08_F	12_P	2	FALSE	L
2018A-82F060618	2018A-D4	08	08_F	NCC_55M	3	FALSE	L
2018A-82F060618	2018A-D4	08	08_F	NCC_44M	4	FALSE	L
2018A-83F060618	2018A-D4	08	08_F	08_P	4	TRUE	L
2018A-83F060618	2018A-D4	08	08_F	12_P	2	FALSE	L
2018A-83F060618	2018A-D4	08	08_F	NCC_55M	1	FALSE	L
2018A-83F060618	2018A-D4	08	08_F	NCC_44M	3	FALSE	L
2018A-84F060618	2018A-D4	08	08_F	08_P	3	TRUE	L
2018A-84F060618	2018A-D4	08	08_F	12_P	2	FALSE	L
2018A-84F060618	2018A-D4	08	08_F	NCC_55M	1	FALSE	L
2018A-84F060618	2018A-D4	08	08_F	NCC_44M	4	FALSE	L
2018A-85F060618	2018A-D4	08	08_F	08_P	3	TRUE	L
2018A-85F060618	2018A-D4	08	08_F	12_P	1	FALSE	L
2018A-85F060618	2018A-D4	08	08_F	NCC_55M	4	FALSE	L
2018A-85F060618	2018A-D4	08	08_F	NCC_44M	2	FALSE	L
2018A-86F060618	2018A-D4	08	08_F	08_P	1	TRUE	L
2018A-86F060618	2018A-D4	08	08_F	12_P	2	FALSE	L
2018A-86F060618	2018A-D4	08	08_F	NCC_55M	4	FALSE	L
2018A-86F060618	2018A-D4	08	08_F	NCC_44M	3	FALSE	L
2018A-87F060618	2018A-D4	08	08_F	08_P	4	TRUE	L
2018A-87F060618	2018A-D4	08	08_F	12_P	3	FALSE	L
2018A-87F060618	2018A-D4	08	08_F	NCC_55M	2	FALSE	L
2018A-87F060618	2018A-D4	08	08_F	NCC_44M	1	FALSE	L
2018A-88F060618	2018A-D4	08	08_F	08_P	4	TRUE	L
2018A-88F060618	2018A-D4	08	08_F	12_P	2	FALSE	L
2018A-88F060618	2018A-D4	08	08_F	NCC_55M	3	FALSE	L
2018A-88F060618	2018A-D4	08	08_F	NCC_44M	1	FALSE	L
2018A-89F060618	2018A-D4	08	08_F	08_P	4	TRUE	L
2018A-89F060618	2018A-D4	08	08_F	12_P	1	FALSE	L
2018A-89F060618	2018A-D4	08	08_F	NCC_55M	3	FALSE	L
2018A-89F060618	2018A-D4	08	08_F	NCC_44M	2	FALSE	L
2018A-90F060618	2018A-D4	08	08_F	08_P	4	TRUE	L
2018A-90F060618	2018A-D4	08	08_F	12_P	1	FALSE	L
2018A-90F060618	2018A-D4	08	08_F	NCC_55M	2	FALSE	L
2018A-90F060618	2018A-D4	08	08_F	NCC_44M	3	FALSE	L
2018A-91F060618	2018A-D4	08	08_F	08_P	3	TRUE	L
2018A-91F060618	2018A-D4	08	08_F	12_P	2	FALSE	L
2018A-91F060618	2018A-D4	08	08_F	NCC_55M	4	FALSE	L
2018A-91F060618	2018A-D4	08	08_F	NCC_44M	1	FALSE	L
2018A-92F060618	2018A-D4	08	08_F	08_P	3	TRUE	L
2018A-92F060618	2018A-D4	08	08_F	12_P	2	FALSE	L
2018A-92F060618	2018A-D4	08	08_F	NCC_55M	1	FALSE	L
2018A-92F060618	2018A-D4	08	08_F	NCC_44M	4	FALSE	L
2018A-93F060618	2018A-D4	08	08_F	08_P	2	TRUE	L
2018A-93F060618	2018A-D4	08	08_F	12_P	4	FALSE	L
2018A-93F060618	2018A-D4	08	08_F	NCC_55M	3	FALSE	L
2018A-93F060618	2018A-D4	08	08_F	NCC_44M	1	FALSE	L
2018A-94F060618	2018A-D4	08	08_F	08_P	3	TRUE	L
2018A-94F060618	2018A-D4	08	08_F	12_P	4	FALSE	L
2018A-94F060618	2018A-D4	08	08_F	NCC_55M	2	FALSE	L
2018A-94F060618	2018A-D4	08	08_F	NCC_44M	1	FALSE	L
2018A-95F060618	2018A-D4	08	08_F	08_P	4	TRUE	L
2018A-95F060618	2018A-D4	08	08_F	12_P	2	FALSE	L
2018A-95F060618	2018A-D4	08	08_F	NCC_55M	3	FALSE	L
2018A-95F060618	2018A-D4	08	08_F	NCC_44M	1	FALSE	L
2018A-96F060618	2018A-D4	08	08_F	08_P	4	TRUE	L
2018A-96F060618	2018A-D4	08	08_F	12_P	3	FALSE	L
2018A-96F060618	2018A-D4	08	08_F	NCC_55M	1	FALSE	L
2018A-96F060618	2018A-D4	08	08_F	NCC_44M	2	FALSE	L
2018A-97F060618	2018A-D4	08	08_F	08_P	3	TRUE	L
2018A-97F060618	2018A-D4	08	08_F	12_P	2	FALSE	L
2018A-97F060618	2018A-D4	08	08_F	NCC_55M	4	FALSE	L
2018A-97F060618	2018A-D4	08	08_F	NCC_44M	1	FALSE	L
2018A-98F060618	2018A-D4	08	08_F	08_P	4	TRUE	L
2018A-98F060618	2018A-D4	08	08_F	12_P	3	FALSE	L
2018A-98F060618	2018A-D4	08	08_F	NCC_55M	1	FALSE	L
2018A-98F060618	2018A-D4	08	08_F	NCC_44M	2	FALSE	L
2018A-99F060618	2018A-D4	08	08_F	08_P	1	TRUE	L
2018A-99F060618	2018A-D4	08	08_F	12_P	2	FALSE	L
2018A-99F060618	2018A-D4	08	08_F	NCC_55M	4	FALSE	L
2018A-99F060618	2018A-D4	08	08_F	NCC_44M	3	FALSE	L
2018A-100F060618	2018A-D4	08	08_F	08_P	3	TRUE	L
2018A-100F060618	2018A-D4	08	08_F	12_P	2	FALSE	L
2018A-100F060618	2018A-D4	08	08_F	NCC_55M	4	FALSE	L
2018A-100F060618	2018A-D4	08	08_F	NCC_44M	1	FALSE	L
2018A-101F060618	2018A-D4	08	08_F	08_P	2	TRUE	L
2018A-101F060618	2018A-D4	08	08_F	12_P	1	FALSE	L
2018A-101F060618	2018A-D4	08	08_F	NCC_55M	4	FALSE	L
2018A-101F060618	2018A-D4	08	08_F	NCC_44M	3	FALSE	L
2018A-27F290518	2018A-D2	09	09_F	09_P	1	TRUE	L
2018A-27F290518	2018A-D2	09	09_F	53_P	4	FALSE	L
2018A-27F290518	2018A-D2	09	09_F	NCC_43M	3	FALSE	L
2018A-27F290518	2018A-D2	09	09_F	NCC_54M	2	FALSE	L
2018A-28F290518	2018A-D2	09	09_F	09_P	1	TRUE	L
2018A-28F290518	2018A-D2	09	09_F	53_P	3	FALSE	L
2018A-28F290518	2018A-D2	09	09_F	NCC_43M	4	FALSE	L
2018A-28F290518	2018A-D2	09	09_F	NCC_54M	2	FALSE	L
2018A-29F290518	2018A-D2	09	09_F	09_P	1	TRUE	L
2018A-29F290518	2018A-D2	09	09_F	53_P	3	FALSE	L
2018A-29F290518	2018A-D2	09	09_F	NCC_43M	4	FALSE	L
2018A-29F290518	2018A-D2	09	09_F	NCC_54M	2	FALSE	L
2018A-30F290518	2018A-D2	09	09_F	09_P	1	TRUE	L
2018A-30F290518	2018A-D2	09	09_F	53_P	3	FALSE	L
2018A-30F290518	2018A-D2	09	09_F	NCC_43M	4	FALSE	L
2018A-30F290518	2018A-D2	09	09_F	NCC_54M	2	FALSE	L
2018A-31F290518	2018A-D2	09	09_F	09_P	1	TRUE	L
2018A-31F290518	2018A-D2	09	09_F	53_P	4	FALSE	L
2018A-31F290518	2018A-D2	09	09_F	NCC_43M	3	FALSE	L
2018A-31F290518	2018A-D2	09	09_F	NCC_54M	2	FALSE	L
2018A-32F290518	2018A-D2	09	09_F	09_P	1	TRUE	L
2018A-32F290518	2018A-D2	09	09_F	53_P	3	FALSE	L
2018A-32F290518	2018A-D2	09	09_F	NCC_43M	2	FALSE	L
2018A-32F290518	2018A-D2	09	09_F	NCC_54M	4	FALSE	L
2018A-33F290518	2018A-D2	09	09_F	09_P	1	TRUE	L
2018A-33F290518	2018A-D2	09	09_F	53_P	4	FALSE	L
2018A-33F290518	2018A-D2	09	09_F	NCC_43M	2	FALSE	L
2018A-33F290518	2018A-D2	09	09_F	NCC_54M	3	FALSE	L
2018A-34F290518	2018A-D2	09	09_F	09_P	1	TRUE	L
2018A-34F290518	2018A-D2	09	09_F	53_P	4	FALSE	L
2018A-34F290518	2018A-D2	09	09_F	NCC_43M	3	FALSE	L
2018A-34F290518	2018A-D2	09	09_F	NCC_54M	2	FALSE	L
2018A-35F290518	2018A-D2	09	09_F	09_P	1	TRUE	L
2018A-35F290518	2018A-D2	09	09_F	53_P	4	FALSE	L
2018A-35F290518	2018A-D2	09	09_F	NCC_43M	2	FALSE	L
2018A-35F290518	2018A-D2	09	09_F	NCC_54M	3	FALSE	L
2018A-36F290518	2018A-D2	09	09_F	09_P	1	TRUE	L
2018A-36F290518	2018A-D2	09	09_F	53_P	4	FALSE	L
2018A-36F290518	2018A-D2	09	09_F	NCC_43M	2	FALSE	L
2018A-36F290518	2018A-D2	09	09_F	NCC_54M	3	FALSE	L
2018A-38F290518	2018A-D2	09	09_F	09_P	2	TRUE	L
2018A-38F290518	2018A-D2	09	09_F	53_P	4	FALSE	L
2018A-38F290518	2018A-D2	09	09_F	NCC_43M	1	FALSE	L
2018A-38F290518	2018A-D2	09	09_F	NCC_54M	3	FALSE	L
2018A-39F290518	2018A-D2	09	09_F	09_P	1	TRUE	L
2018A-39F290518	2018A-D2	09	09_F	53_P	4	FALSE	L
2018A-39F290518	2018A-D2	09	09_F	NCC_43M	2	FALSE	L
2018A-39F290518	2018A-D2	09	09_F	NCC_54M	3	FALSE	L
2018A-40F290518	2018A-D2	09	09_F	09_P	1	TRUE	L
2018A-40F290518	2018A-D2	09	09_F	53_P	4	FALSE	L
2018A-40F290518	2018A-D2	09	09_F	NCC_43M	2	FALSE	L
2018A-40F290518	2018A-D2	09	09_F	NCC_54M	3	FALSE	L
2018A-41F290518	2018A-D2	09	09_F	09_P	2	TRUE	L
2018A-41F290518	2018A-D2	09	09_F	53_P	4	FALSE	L
2018A-41F290518	2018A-D2	09	09_F	NCC_43M	3	FALSE	L
2018A-41F290518	2018A-D2	09	09_F	NCC_54M	1	FALSE	L
2018A-42F290518	2018A-D2	09	09_F	09_P	1	TRUE	L
2018A-42F290518	2018A-D2	09	09_F	53_P	3	FALSE	L
2018A-42F290518	2018A-D2	09	09_F	NCC_43M	2	FALSE	L
2018A-42F290518	2018A-D2	09	09_F	NCC_54M	4	FALSE	L
2018A-43F290518	2018A-D2	09	09_F	09_P	1	TRUE	L
2018A-43F290518	2018A-D2	09	09_F	53_P	4	FALSE	L
2018A-43F290518	2018A-D2	09	09_F	NCC_43M	3	FALSE	L
2018A-43F290518	2018A-D2	09	09_F	NCC_54M	2	FALSE	L
2018A-44F290518	2018A-D2	09	09_F	09_P	1	TRUE	L
2018A-44F290518	2018A-D2	09	09_F	53_P	3	FALSE	L
2018A-44F290518	2018A-D2	09	09_F	NCC_43M	2	FALSE	L
2018A-44F290518	2018A-D2	09	09_F	NCC_54M	4	FALSE	L
2018A-45F290518	2018A-D2	09	09_F	09_P	1	TRUE	L
2018A-45F290518	2018A-D2	09	09_F	53_P	4	FALSE	L
2018A-45F290518	2018A-D2	09	09_F	NCC_43M	2	FALSE	L
2018A-45F290518	2018A-D2	09	09_F	NCC_54M	3	FALSE	L
2018A-46F290518	2018A-D2	09	09_F	09_P	2	TRUE	L
2018A-46F290518	2018A-D2	09	09_F	53_P	4	FALSE	L
2018A-46F290518	2018A-D2	09	09_F	NCC_43M	1	FALSE	L
2018A-46F290518	2018A-D2	09	09_F	NCC_54M	3	FALSE	L
2018A-47F290518	2018A-D2	09	09_F	09_P	1	TRUE	L
2018A-47F290518	2018A-D2	09	09_F	53_P	3	FALSE	L
2018A-47F290518	2018A-D2	09	09_F	NCC_43M	2	FALSE	L
2018A-47F290518	2018A-D2	09	09_F	NCC_54M	4	FALSE	L
2018A-48F290518	2018A-D2	09	09_F	09_P	1	TRUE	L
2018A-48F290518	2018A-D2	09	09_F	53_P	3	FALSE	L
2018A-48F290518	2018A-D2	09	09_F	NCC_43M	2	FALSE	L
2018A-48F290518	2018A-D2	09	09_F	NCC_54M	4	FALSE	L
2018A-49F290518	2018A-D2	09	09_F	09_P	1	TRUE	L
2018A-49F290518	2018A-D2	09	09_F	53_P	3	FALSE	L
2018A-49F290518	2018A-D2	09	09_F	NCC_43M	2	FALSE	L
2018A-49F290518	2018A-D2	09	09_F	NCC_54M	4	FALSE	L
2018A-50F290518	2018A-D2	09	09_F	09_P	1	TRUE	L
2018A-50F290518	2018A-D2	09	09_F	53_P	3	FALSE	L
2018A-50F290518	2018A-D2	09	09_F	NCC_43M	2	FALSE	L
2018A-50F290518	2018A-D2	09	09_F	NCC_54M	4	FALSE	L
2018A-51F290518	2018A-D2	09	09_F	09_P	1	TRUE	L
2018A-51F290518	2018A-D2	09	09_F	53_P	3	FALSE	L
2018A-51F290518	2018A-D2	09	09_F	NCC_43M	2	FALSE	L
2018A-51F290518	2018A-D2	09	09_F	NCC_54M	4	FALSE	L
2018A-52F290518	2018A-D2	09	09_F	09_P	1	TRUE	L
2018A-52F290518	2018A-D2	09	09_F	53_P	3	FALSE	L
2018A-52F290518	2018A-D2	09	09_F	NCC_43M	2	FALSE	L
2018A-52F290518	2018A-D2	09	09_F	NCC_54M	4	FALSE	L
2018A-1F280518	2018A-D1	10	10_F	10_P	3	TRUE	L
2018A-1F280518	2018A-D1	10	10_F	35_P	4	FALSE	L
2018A-1F280518	2018A-D1	10	10_F	NCC_64M	1	FALSE	L
2018A-1F280518	2018A-D1	10	10_F	NCC_60M	2	FALSE	L
2018A-2F280518	2018A-D1	10	10_F	10_P	1	TRUE	L
2018A-2F280518	2018A-D1	10	10_F	35_P	4	FALSE	L
2018A-2F280518	2018A-D1	10	10_F	NCC_64M	2	FALSE	L
2018A-2F280518	2018A-D1	10	10_F	NCC_60M	3	FALSE	L
2018A-3F280518	2018A-D1	10	10_F	10_P	2	TRUE	L
2018A-3F280518	2018A-D1	10	10_F	35_P	4	FALSE	L
2018A-3F280518	2018A-D1	10	10_F	NCC_64M	1	FALSE	L
2018A-3F280518	2018A-D1	10	10_F	NCC_60M	3	FALSE	L
2018A-4F280518	2018A-D1	10	10_F	10_P	3	TRUE	L
2018A-4F280518	2018A-D1	10	10_F	35_P	4	FALSE	L
2018A-4F280518	2018A-D1	10	10_F	NCC_64M	1	FALSE	L
2018A-4F280518	2018A-D1	10	10_F	NCC_60M	2	FALSE	L
2018A-5F280518	2018A-D1	10	10_F	10_P	2	TRUE	L
2018A-5F280518	2018A-D1	10	10_F	35_P	4	FALSE	L
2018A-5F280518	2018A-D1	10	10_F	NCC_64M	3	FALSE	L
2018A-5F280518	2018A-D1	10	10_F	NCC_60M	1	FALSE	L
2018A-6F280518	2018A-D1	10	10_F	10_P	1	TRUE	L
2018A-6F280518	2018A-D1	10	10_F	35_P	4	FALSE	L
2018A-6F280518	2018A-D1	10	10_F	NCC_64M	2	FALSE	L
2018A-6F280518	2018A-D1	10	10_F	NCC_60M	3	FALSE	L
2018A-7F280518	2018A-D1	10	10_F	10_P	2	TRUE	L
2018A-7F280518	2018A-D1	10	10_F	35_P	4	FALSE	L
2018A-7F280518	2018A-D1	10	10_F	NCC_64M	1	FALSE	L
2018A-7F280518	2018A-D1	10	10_F	NCC_60M	3	FALSE	L
2018A-8F280518	2018A-D1	10	10_F	10_P	3	TRUE	L
2018A-8F280518	2018A-D1	10	10_F	35_P	4	FALSE	L
2018A-8F280518	2018A-D1	10	10_F	NCC_64M	2	FALSE	L
2018A-8F280518	2018A-D1	10	10_F	NCC_60M	1	FALSE	L
2018A-9F280518	2018A-D1	10	10_F	10_P	3	TRUE	L
2018A-9F280518	2018A-D1	10	10_F	35_P	4	FALSE	L
2018A-9F280518	2018A-D1	10	10_F	NCC_64M	1	FALSE	L
2018A-9F280518	2018A-D1	10	10_F	NCC_60M	2	FALSE	L
2018A-10F280518	2018A-D1	10	10_F	10_P	1	TRUE	L
2018A-10F280518	2018A-D1	10	10_F	35_P	4	FALSE	L
2018A-10F280518	2018A-D1	10	10_F	NCC_64M	2	FALSE	L
2018A-10F280518	2018A-D1	10	10_F	NCC_60M	3	FALSE	L
2018A-11F280518	2018A-D1	10	10_F	10_P	3	TRUE	L
2018A-11F280518	2018A-D1	10	10_F	35_P	4	FALSE	L
2018A-11F280518	2018A-D1	10	10_F	NCC_64M	1	FALSE	L
2018A-11F280518	2018A-D1	10	10_F	NCC_60M	2	FALSE	L
2018A-12F280518	2018A-D1	10	10_F	10_P	1	TRUE	L
2018A-12F280518	2018A-D1	10	10_F	35_P	4	FALSE	L
2018A-12F280518	2018A-D1	10	10_F	NCC_64M	3	FALSE	L
2018A-12F280518	2018A-D1	10	10_F	NCC_60M	2	FALSE	L
2018A-13F280518	2018A-D1	10	10_F	10_P	1	TRUE	L
2018A-13F280518	2018A-D1	10	10_F	35_P	4	FALSE	L
2018A-13F280518	2018A-D1	10	10_F	NCC_64M	2	FALSE	L
2018A-13F280518	2018A-D1	10	10_F	NCC_60M	3	FALSE	L
2018A-14F280518	2018A-D1	10	10_F	10_P	1	TRUE	L
2018A-14F280518	2018A-D1	10	10_F	35_P	4	FALSE	L
2018A-14F280518	2018A-D1	10	10_F	NCC_64M	3	FALSE	L
2018A-14F280518	2018A-D1	10	10_F	NCC_60M	2	FALSE	L
2018A-15F280518	2018A-D1	10	10_F	10_P	1	TRUE	L
2018A-15F280518	2018A-D1	10	10_F	35_P	3	FALSE	L
2018A-15F280518	2018A-D1	10	10_F	NCC_64M	2	FALSE	L
2018A-15F280518	2018A-D1	10	10_F	NCC_60M	4	FALSE	L
2018A-16F280518	2018A-D1	10	10_F	10_P	3	TRUE	L
2018A-16F280518	2018A-D1	10	10_F	35_P	4	FALSE	L
2018A-16F280518	2018A-D1	10	10_F	NCC_64M	1	FALSE	L
2018A-16F280518	2018A-D1	10	10_F	NCC_60M	2	FALSE	L
2018A-17F280518	2018A-D1	10	10_F	10_P	2	TRUE	L
2018A-17F280518	2018A-D1	10	10_F	35_P	4	FALSE	L
2018A-17F280518	2018A-D1	10	10_F	NCC_64M	1	FALSE	L
2018A-17F280518	2018A-D1	10	10_F	NCC_60M	3	FALSE	L
2018A-18F280518	2018A-D1	10	10_F	10_P	2	TRUE	L
2018A-18F280518	2018A-D1	10	10_F	35_P	3	FALSE	L
2018A-18F280518	2018A-D1	10	10_F	NCC_64M	1	FALSE	L
2018A-18F280518	2018A-D1	10	10_F	NCC_60M	4	FALSE	L
2018A-19F280518	2018A-D1	10	10_F	10_P	2	TRUE	L
2018A-19F280518	2018A-D1	10	10_F	35_P	3	FALSE	L
2018A-19F280518	2018A-D1	10	10_F	NCC_64M	1	FALSE	L
2018A-19F280518	2018A-D1	10	10_F	NCC_60M	4	FALSE	L
2018A-20F280518	2018A-D1	10	10_F	10_P	1	TRUE	L
2018A-20F280518	2018A-D1	10	10_F	35_P	3	FALSE	L
2018A-21F280518	2018A-D1	10	10_F	10_P	1	TRUE	L
2018A-21F280518	2018A-D1	10	10_F	35_P	4	FALSE	L
2018A-21F280518	2018A-D1	10	10_F	NCC_64M	2	FALSE	L
2018A-21F280518	2018A-D1	10	10_F	NCC_60M	3	FALSE	L
2018A-22F280518	2018A-D1	10	10_F	10_P	3	TRUE	L
2018A-22F280518	2018A-D1	10	10_F	35_P	4	FALSE	L
2018A-22F280518	2018A-D1	10	10_F	NCC_64M	2	FALSE	L
2018A-22F280518	2018A-D1	10	10_F	NCC_60M	1	FALSE	L
2018A-23F280518	2018A-D1	10	10_F	10_P	1	TRUE	L
2018A-23F280518	2018A-D1	10	10_F	35_P	4	FALSE	L
2018A-23F280518	2018A-D1	10	10_F	NCC_64M	3	FALSE	L
2018A-23F280518	2018A-D1	10	10_F	NCC_60M	2	FALSE	L
2018A-24F280518	2018A-D1	10	10_F	10_P	2	TRUE	L
2018A-24F280518	2018A-D1	10	10_F	35_P	4	FALSE	L
2018A-24F280518	2018A-D1	10	10_F	NCC_64M	3	FALSE	L
2018A-24F280518	2018A-D1	10	10_F	NCC_60M	1	FALSE	L
2018A-25F280518	2018A-D1	10	10_F	10_P	1	TRUE	L
2018A-25F280518	2018A-D1	10	10_F	35_P	4	FALSE	L
2018A-25F280518	2018A-D1	10	10_F	NCC_64M	3	FALSE	L
2018A-25F280518	2018A-D1	10	10_F	NCC_60M	2	FALSE	L
2018A-26F280518	2018A-D1	10	10_F	10_P	1	TRUE	L
2018A-26F280518	2018A-D1	10	10_F	35_P	4	FALSE	L
2018A-26F280518	2018A-D1	10	10_F	NCC_64M	2	FALSE	L
2018A-26F280518	2018A-D1	10	10_F	NCC_60M	3	FALSE	L
2018A-1F280518	2018A-D1	11	11_F	11_P	2	TRUE	L
2018A-1F280518	2018A-D1	11	11_F	62_P	3	FALSE	L
2018A-1F280518	2018A-D1	11	11_F	NCC_51M	1	FALSE	L
2018A-1F280518	2018A-D1	11	11_F	NCC_46M	4	FALSE	L
2018A-2F280518	2018A-D1	11	11_F	11_P	3	TRUE	L
2018A-2F280518	2018A-D1	11	11_F	62_P	2	FALSE	L
2018A-2F280518	2018A-D1	11	11_F	NCC_51M	1	FALSE	L
2018A-2F280518	2018A-D1	11	11_F	NCC_46M	4	FALSE	L
2018A-3F280518	2018A-D1	11	11_F	11_P	2	TRUE	L
2018A-3F280518	2018A-D1	11	11_F	62_P	3	FALSE	L
2018A-3F280518	2018A-D1	11	11_F	NCC_51M	1	FALSE	L
2018A-3F280518	2018A-D1	11	11_F	NCC_46M	4	FALSE	L
2018A-4F280518	2018A-D1	11	11_F	11_P	3	TRUE	L
2018A-4F280518	2018A-D1	11	11_F	62_P	1	FALSE	L
2018A-4F280518	2018A-D1	11	11_F	NCC_51M	2	FALSE	L
2018A-4F280518	2018A-D1	11	11_F	NCC_46M	4	FALSE	L
2018A-5F280518	2018A-D1	11	11_F	11_P	3	TRUE	L
2018A-5F280518	2018A-D1	11	11_F	62_P	2	FALSE	L
2018A-5F280518	2018A-D1	11	11_F	NCC_51M	1	FALSE	L
2018A-5F280518	2018A-D1	11	11_F	NCC_46M	4	FALSE	L
2018A-6F280518	2018A-D1	11	11_F	11_P	3	TRUE	L
2018A-6F280518	2018A-D1	11	11_F	62_P	2	FALSE	L
2018A-6F280518	2018A-D1	11	11_F	NCC_51M	1	FALSE	L
2018A-6F280518	2018A-D1	11	11_F	NCC_46M	4	FALSE	L
2018A-7F280518	2018A-D1	11	11_F	11_P	1	TRUE	L
2018A-7F280518	2018A-D1	11	11_F	62_P	3	FALSE	L
2018A-7F280518	2018A-D1	11	11_F	NCC_51M	2	FALSE	L
2018A-7F280518	2018A-D1	11	11_F	NCC_46M	4	FALSE	L
2018A-8F280518	2018A-D1	11	11_F	11_P	2	TRUE	L
2018A-8F280518	2018A-D1	11	11_F	62_P	1	FALSE	L
2018A-8F280518	2018A-D1	11	11_F	NCC_51M	3	FALSE	L
2018A-8F280518	2018A-D1	11	11_F	NCC_46M	4	FALSE	L
2018A-9F280518	2018A-D1	11	11_F	11_P	4	TRUE	L
2018A-9F280518	2018A-D1	11	11_F	62_P	1	FALSE	L
2018A-9F280518	2018A-D1	11	11_F	NCC_51M	2	FALSE	L
2018A-9F280518	2018A-D1	11	11_F	NCC_46M	3	FALSE	L
2018A-10F280518	2018A-D1	11	11_F	11_P	3	TRUE	L
2018A-10F280518	2018A-D1	11	11_F	62_P	2	FALSE	L
2018A-10F280518	2018A-D1	11	11_F	NCC_51M	1	FALSE	L
2018A-10F280518	2018A-D1	11	11_F	NCC_46M	4	FALSE	L
2018A-11F280518	2018A-D1	11	11_F	11_P	3	TRUE	L
2018A-11F280518	2018A-D1	11	11_F	62_P	1	FALSE	L
2018A-11F280518	2018A-D1	11	11_F	NCC_51M	2	FALSE	L
2018A-11F280518	2018A-D1	11	11_F	NCC_46M	4	FALSE	L
2018A-12F280518	2018A-D1	11	11_F	11_P	3	TRUE	L
2018A-12F280518	2018A-D1	11	11_F	62_P	2	FALSE	L
2018A-12F280518	2018A-D1	11	11_F	NCC_51M	1	FALSE	L
2018A-12F280518	2018A-D1	11	11_F	NCC_46M	4	FALSE	L
2018A-13F280518	2018A-D1	11	11_F	11_P	1	TRUE	L
2018A-13F280518	2018A-D1	11	11_F	62_P	2	FALSE	L
2018A-13F280518	2018A-D1	11	11_F	NCC_51M	4	FALSE	L
2018A-13F280518	2018A-D1	11	11_F	NCC_46M	3	FALSE	L
2018A-14F280518	2018A-D1	11	11_F	11_P	2	TRUE	L
2018A-14F280518	2018A-D1	11	11_F	62_P	1	FALSE	L
2018A-14F280518	2018A-D1	11	11_F	NCC_51M	3	FALSE	L
2018A-14F280518	2018A-D1	11	11_F	NCC_46M	4	FALSE	L
2018A-15F280518	2018A-D1	11	11_F	11_P	4	TRUE	L
2018A-15F280518	2018A-D1	11	11_F	62_P	1	FALSE	L
2018A-15F280518	2018A-D1	11	11_F	NCC_51M	2	FALSE	L
2018A-15F280518	2018A-D1	11	11_F	NCC_46M	3	FALSE	L
2018A-16F280518	2018A-D1	11	11_F	11_P	2	TRUE	L
2018A-16F280518	2018A-D1	11	11_F	62_P	1	FALSE	L
2018A-16F280518	2018A-D1	11	11_F	NCC_51M	3	FALSE	L
2018A-16F280518	2018A-D1	11	11_F	NCC_46M	4	FALSE	L
2018A-17F280518	2018A-D1	11	11_F	11_P	1	TRUE	L
2018A-17F280518	2018A-D1	11	11_F	62_P	3	FALSE	L
2018A-17F280518	2018A-D1	11	11_F	NCC_51M	2	FALSE	L
2018A-17F280518	2018A-D1	11	11_F	NCC_46M	4	FALSE	L
2018A-18F280518	2018A-D1	11	11_F	11_P	1	TRUE	L
2018A-18F280518	2018A-D1	11	11_F	62_P	2	FALSE	L
2018A-18F280518	2018A-D1	11	11_F	NCC_51M	3	FALSE	L
2018A-18F280518	2018A-D1	11	11_F	NCC_46M	4	FALSE	L
2018A-19F280518	2018A-D1	11	11_F	11_P	1	TRUE	L
2018A-19F280518	2018A-D1	11	11_F	62_P	2	FALSE	L
2018A-19F280518	2018A-D1	11	11_F	NCC_51M	3	FALSE	L
2018A-19F280518	2018A-D1	11	11_F	NCC_46M	4	FALSE	L
2018A-20F280518	2018A-D1	11	11_F	11_P	1	TRUE	L
2018A-20F280518	2018A-D1	11	11_F	62_P	3	FALSE	L
2018A-20F280518	2018A-D1	11	11_F	NCC_46M	4	FALSE	L
2018A-21F280518	2018A-D1	11	11_F	11_P	3	TRUE	L
2018A-21F280518	2018A-D1	11	11_F	62_P	1	FALSE	L
2018A-21F280518	2018A-D1	11	11_F	NCC_51M	2	FALSE	L
2018A-21F280518	2018A-D1	11	11_F	NCC_46M	4	FALSE	L
2018A-22F280518	2018A-D1	11	11_F	11_P	3	TRUE	L
2018A-22F280518	2018A-D1	11	11_F	62_P	1	FALSE	L
2018A-22F280518	2018A-D1	11	11_F	NCC_51M	2	FALSE	L
2018A-22F280518	2018A-D1	11	11_F	NCC_46M	4	FALSE	L
2018A-23F280518	2018A-D1	11	11_F	11_P	2	TRUE	L
2018A-23F280518	2018A-D1	11	11_F	62_P	1	FALSE	L
2018A-23F280518	2018A-D1	11	11_F	NCC_51M	3	FALSE	L
2018A-23F280518	2018A-D1	11	11_F	NCC_46M	4	FALSE	L
2018A-24F280518	2018A-D1	11	11_F	11_P	2	TRUE	L
2018A-24F280518	2018A-D1	11	11_F	62_P	1	FALSE	L
2018A-24F280518	2018A-D1	11	11_F	NCC_51M	3	FALSE	L
2018A-24F280518	2018A-D1	11	11_F	NCC_46M	4	FALSE	L
2018A-25F280518	2018A-D1	11	11_F	11_P	2	TRUE	L
2018A-25F280518	2018A-D1	11	11_F	62_P	1	FALSE	L
2018A-25F280518	2018A-D1	11	11_F	NCC_51M	3	FALSE	L
2018A-25F280518	2018A-D1	11	11_F	NCC_46M	4	FALSE	L
2018A-26F280518	2018A-D1	11	11_F	11_P	2	TRUE	L
2018A-26F280518	2018A-D1	11	11_F	62_P	1	FALSE	L
2018A-26F280518	2018A-D1	11	11_F	NCC_51M	3	FALSE	L
2018A-26F280518	2018A-D1	11	11_F	NCC_46M	4	FALSE	L
2018A-53F050618	2018A-D3	12	12_F	12_P	1	TRUE	R
2018A-53F050618	2018A-D3	12	12_F	65_P	4	FALSE	R
2018A-53F050618	2018A-D3	12	12_F	NCC_65M	3	FALSE	R
2018A-53F050618	2018A-D3	12	12_F	NCC_57M	2	FALSE	R
2018A-54F050618	2018A-D3	12	12_F	12_P	1	TRUE	R
2018A-54F050618	2018A-D3	12	12_F	65_P	3	FALSE	R
2018A-54F050618	2018A-D3	12	12_F	NCC_65M	4	FALSE	R
2018A-54F050618	2018A-D3	12	12_F	NCC_57M	2	FALSE	R
2018A-55F050618	2018A-D3	12	12_F	12_P	1	TRUE	R
2018A-55F050618	2018A-D3	12	12_F	65_P	4	FALSE	R
2018A-55F050618	2018A-D3	12	12_F	NCC_65M	2	FALSE	R
2018A-55F050618	2018A-D3	12	12_F	NCC_57M	3	FALSE	R
2018A-56F050618	2018A-D3	12	12_F	12_P	1	TRUE	R
2018A-56F050618	2018A-D3	12	12_F	65_P	2	FALSE	R
2018A-56F050618	2018A-D3	12	12_F	NCC_65M	3	FALSE	R
2018A-56F050618	2018A-D3	12	12_F	NCC_57M	4	FALSE	R
2018A-57F050618	2018A-D3	12	12_F	12_P	3	TRUE	R
2018A-57F050618	2018A-D3	12	12_F	65_P	1	FALSE	R
2018A-57F050618	2018A-D3	12	12_F	NCC_65M	2	FALSE	R
2018A-57F050618	2018A-D3	12	12_F	NCC_57M	4	FALSE	R
2018A-58F050618	2018A-D3	12	12_F	12_P	1	TRUE	R
2018A-58F050618	2018A-D3	12	12_F	65_P	2	FALSE	R
2018A-58F050618	2018A-D3	12	12_F	NCC_65M	3	FALSE	R
2018A-58F050618	2018A-D3	12	12_F	NCC_57M	4	FALSE	R
2018A-59F050618	2018A-D3	12	12_F	12_P	2	TRUE	R
2018A-59F050618	2018A-D3	12	12_F	65_P	1	FALSE	R
2018A-59F050618	2018A-D3	12	12_F	NCC_65M	3	FALSE	R
2018A-59F050618	2018A-D3	12	12_F	NCC_57M	4	FALSE	R
2018A-60F050618	2018A-D3	12	12_F	12_P	1	TRUE	R
2018A-60F050618	2018A-D3	12	12_F	65_P	3	FALSE	R
2018A-60F050618	2018A-D3	12	12_F	NCC_65M	2	FALSE	R
2018A-60F050618	2018A-D3	12	12_F	NCC_57M	4	FALSE	R
2018A-61F050618	2018A-D3	12	12_F	12_P	1	TRUE	R
2018A-61F050618	2018A-D3	12	12_F	65_P	2	FALSE	R
2018A-61F050618	2018A-D3	12	12_F	NCC_65M	3	FALSE	R
2018A-61F050618	2018A-D3	12	12_F	NCC_57M	4	FALSE	R
2018A-62F050618	2018A-D3	12	12_F	12_P	2	TRUE	R
2018A-62F050618	2018A-D3	12	12_F	65_P	3	FALSE	R
2018A-62F050618	2018A-D3	12	12_F	NCC_65M	1	FALSE	R
2018A-62F050618	2018A-D3	12	12_F	NCC_57M	4	FALSE	R
2018A-63F050618	2018A-D3	12	12_F	12_P	1	TRUE	R
2018A-63F050618	2018A-D3	12	12_F	65_P	3	FALSE	R
2018A-63F050618	2018A-D3	12	12_F	NCC_65M	4	FALSE	R
2018A-63F050618	2018A-D3	12	12_F	NCC_57M	2	FALSE	R
2018A-64F050618	2018A-D3	12	12_F	12_P	2	TRUE	R
2018A-64F050618	2018A-D3	12	12_F	65_P	3	FALSE	R
2018A-64F050618	2018A-D3	12	12_F	NCC_65M	4	FALSE	R
2018A-64F050618	2018A-D3	12	12_F	NCC_57M	1	FALSE	R
2018A-65F050618	2018A-D3	12	12_F	12_P	1	TRUE	R
2018A-65F050618	2018A-D3	12	12_F	65_P	3	FALSE	R
2018A-65F050618	2018A-D3	12	12_F	NCC_65M	2	FALSE	R
2018A-65F050618	2018A-D3	12	12_F	NCC_57M	4	FALSE	R
2018A-66F050618	2018A-D3	12	12_F	12_P	2	TRUE	R
2018A-66F050618	2018A-D3	12	12_F	65_P	1	FALSE	R
2018A-66F050618	2018A-D3	12	12_F	NCC_65M	3	FALSE	R
2018A-66F050618	2018A-D3	12	12_F	NCC_57M	4	FALSE	R
2018A-67F050618	2018A-D3	12	12_F	12_P	1	TRUE	R
2018A-67F050618	2018A-D3	12	12_F	65_P	2	FALSE	R
2018A-67F050618	2018A-D3	12	12_F	NCC_65M	3	FALSE	R
2018A-67F050618	2018A-D3	12	12_F	NCC_57M	4	FALSE	R
2018A-68F050618	2018A-D3	12	12_F	12_P	1	TRUE	R
2018A-68F050618	2018A-D3	12	12_F	65_P	2	FALSE	R
2018A-68F050618	2018A-D3	12	12_F	NCC_65M	3	FALSE	R
2018A-68F050618	2018A-D3	12	12_F	NCC_57M	4	FALSE	R
2018A-69F050618	2018A-D3	12	12_F	12_P	3	TRUE	R
2018A-69F050618	2018A-D3	12	12_F	65_P	4	FALSE	R
2018A-69F050618	2018A-D3	12	12_F	NCC_65M	1	FALSE	R
2018A-69F050618	2018A-D3	12	12_F	NCC_57M	2	FALSE	R
2018A-70F050618	2018A-D3	12	12_F	12_P	1	TRUE	R
2018A-70F050618	2018A-D3	12	12_F	65_P	4	FALSE	R
2018A-70F050618	2018A-D3	12	12_F	NCC_65M	2	FALSE	R
2018A-70F050618	2018A-D3	12	12_F	NCC_57M	3	FALSE	R
2018A-71F050618	2018A-D3	12	12_F	12_P	2	TRUE	R
2018A-71F050618	2018A-D3	12	12_F	65_P	3	FALSE	R
2018A-71F050618	2018A-D3	12	12_F	NCC_65M	1	FALSE	R
2018A-71F050618	2018A-D3	12	12_F	NCC_57M	4	FALSE	R
2018A-72F050618	2018A-D3	12	12_F	12_P	2	TRUE	R
2018A-72F050618	2018A-D3	12	12_F	65_P	4	FALSE	R
2018A-72F050618	2018A-D3	12	12_F	NCC_65M	1	FALSE	R
2018A-72F050618	2018A-D3	12	12_F	NCC_57M	3	FALSE	R
2018A-73F050618	2018A-D3	12	12_F	12_P	2	TRUE	R
2018A-73F050618	2018A-D3	12	12_F	65_P	3	FALSE	R
2018A-73F050618	2018A-D3	12	12_F	NCC_65M	1	FALSE	R
2018A-73F050618	2018A-D3	12	12_F	NCC_57M	4	FALSE	R
2018A-74F050618	2018A-D3	12	12_F	12_P	2	TRUE	R
2018A-74F050618	2018A-D3	12	12_F	65_P	1	FALSE	R
2018A-74F050618	2018A-D3	12	12_F	NCC_65M	3	FALSE	R
2018A-74F050618	2018A-D3	12	12_F	NCC_57M	4	FALSE	R
2018A-75F050618	2018A-D3	12	12_F	12_P	3	TRUE	R
2018A-75F050618	2018A-D3	12	12_F	65_P	1	FALSE	R
2018A-75F050618	2018A-D3	12	12_F	NCC_65M	4	FALSE	R
2018A-75F050618	2018A-D3	12	12_F	NCC_57M	2	FALSE	R
2018A-76F050618	2018A-D3	12	12_F	12_P	2	TRUE	R
2018A-76F050618	2018A-D3	12	12_F	65_P	3	FALSE	R
2018A-76F050618	2018A-D3	12	12_F	NCC_65M	1	FALSE	R
2018A-76F050618	2018A-D3	12	12_F	NCC_57M	4	FALSE	R
2018A-77F050618	2018A-D3	12	12_F	12_P	2	TRUE	R
2018A-77F050618	2018A-D3	12	12_F	65_P	3	FALSE	R
2018A-77F050618	2018A-D3	12	12_F	NCC_65M	1	FALSE	R
2018A-77F050618	2018A-D3	12	12_F	NCC_57M	4	FALSE	R
2020A-D3-2020-01-28-R4	2020A-D3	13	13_F	NCC_16M	1	FALSE	R
2020A-D3-2020-01-28-R4	2020A-D3	13	13_F	TURA171219RY	2	FALSE	R
2020A-D3-2020-01-28-R4	2020A-D3	13	13_F	13_P	3	TRUE	R
2020A-D3-2020-01-28-R4	2020A-D3	13	13_F	HOTO020919RY	4	FALSE	R
2020A-D3-2020-01-28-R6	2020A-D3	13	13_F	NCC_28M	1	FALSE	R
2020A-D3-2020-01-28-R6	2020A-D3	13	13_F	13_P	2	TRUE	R
2020A-D3-2020-01-28-R6	2020A-D3	13	13_F	NCC_18M	3	FALSE	R
2020A-D3-2020-01-28-R6	2020A-D3	13	13_F	22MDS	4	FALSE	R
2020A-D3-2020-01-28-R9	2020A-D3	13	13_F	13_P	1	TRUE	R
2020A-D3-2020-01-28-R9	2020A-D3	13	13_F	NCC_21M	2	FALSE	R
2020A-D3-2020-01-28-R9	2020A-D3	13	13_F	NCC_16M	3	FALSE	R
2020A-D3-2020-01-28-R9	2020A-D3	13	13_F	MASL081019RY	4	FALSE	R
2020A-D3-2020-01-28-R13	2020A-D3	13	13_F	13_P	1	TRUE	R
2020A-D3-2020-01-28-R13	2020A-D3	13	13_F	ROME041119RY	2	FALSE	R
2020A-D3-2020-01-28-R13	2020A-D3	13	13_F	ZACH101219RY	3	FALSE	R
2020A-D3-2020-01-28-R13	2020A-D3	13	13_F	HOTO020919RY	4	FALSE	R
2020A-D3-2020-01-28-R20	2020A-D3	13	13_F	13_P	1	TRUE	R
2020A-D3-2020-01-28-R20	2020A-D3	13	13_F	ROME041119RY	2	FALSE	R
2020A-D3-2020-01-28-R20	2020A-D3	13	13_F	NCC_18M	3	FALSE	R
2020A-D3-2020-01-28-R20	2020A-D3	13	13_F	NCC_25M	4	FALSE	R
2020A-D3-2020-01-28-R10	2020A-D3	13	13_F	13_P	1	TRUE	R
2020A-D3-2020-01-28-R10	2020A-D3	13	13_F	NCC_21M	2	FALSE	R
2020A-D3-2020-01-28-R10	2020A-D3	13	13_F	PESV051119RY	3	FALSE	R
2020A-D3-2020-01-28-R10	2020A-D3	13	13_F	ZACH101219RY	4	FALSE	R
2020A-D3-2020-01-28-R17	2020A-D3	13	13_F	13_P	1	TRUE	R
2020A-D3-2020-01-28-R17	2020A-D3	13	13_F	PESV051119RY	2	FALSE	R
2020A-D3-2020-01-28-R17	2020A-D3	13	13_F	NCC_21M	3	FALSE	R
2020A-D3-2020-01-28-R17	2020A-D3	13	13_F	NCC_17M	4	FALSE	R
2020A-D3-2020-01-28-R1	2020A-D3	13	13_F	MASL081019RY	1	FALSE	R
2020A-D3-2020-01-28-R1	2020A-D3	13	13_F	TURA171219RY	2	FALSE	R
2020A-D3-2020-01-28-R1	2020A-D3	13	13_F	13_P	3	TRUE	R
2020A-D3-2020-01-28-R1	2020A-D3	13	13_F	22MDS	4	FALSE	R
2020A-D3-2020-01-28-R2	2020A-D3	13	13_F	13_P	1	TRUE	R
2020A-D3-2020-01-28-R2	2020A-D3	13	13_F	NCC_21M	2	FALSE	R
2020A-D3-2020-01-28-R2	2020A-D3	13	13_F	NCC_28M	3	FALSE	R
2020A-D3-2020-01-28-R2	2020A-D3	13	13_F	ZACH101219RY	4	FALSE	R
2020A-D3-2020-01-28-R11	2020A-D3	13	13_F	13_P	1	TRUE	R
2020A-D3-2020-01-28-R11	2020A-D3	13	13_F	NCC_20M	2	FALSE	R
2020A-D3-2020-01-28-R11	2020A-D3	13	13_F	BRKR210519RY	3	FALSE	R
2020A-D3-2020-01-28-R11	2020A-D3	13	13_F	NCC_17M	4	FALSE	R
2020A-D3-2020-01-28-R15	2020A-D3	13	13_F	NCC_18M	1	FALSE	R
2020A-D3-2020-01-28-R15	2020A-D3	13	13_F	13_P	2	TRUE	R
2020A-D3-2020-01-28-R15	2020A-D3	13	13_F	ROME041119RY	3	FALSE	R
2020A-D3-2020-01-28-R15	2020A-D3	13	13_F	NCC_25M	4	FALSE	R
2020A-D3-2020-01-28-R16	2020A-D3	13	13_F	13_P	1	TRUE	R
2020A-D3-2020-01-28-R16	2020A-D3	13	13_F	KAKS300419RY	2	FALSE	R
2020A-D3-2020-01-28-R16	2020A-D3	13	13_F	NCC_18M	3	FALSE	R
2020A-D3-2020-01-28-R16	2020A-D3	13	13_F	HOTO020919RY	4	FALSE	R
2020A-D3-2020-01-28-R14	2020A-D3	13	13_F	13_P	1	TRUE	R
2020A-D3-2020-01-28-R14	2020A-D3	13	13_F	PESV051119RY	2	FALSE	R
2020A-D3-2020-01-28-R14	2020A-D3	13	13_F	22MDS	3	FALSE	R
2020A-D3-2020-01-28-R14	2020A-D3	13	13_F	NCC_16M	4	FALSE	R
2020A-D3-2020-01-28-R18	2020A-D3	13	13_F	13_P	1	TRUE	R
2020A-D3-2020-01-28-R18	2020A-D3	13	13_F	PESV051119RY	2	FALSE	R
2020A-D3-2020-01-28-R18	2020A-D3	13	13_F	NCC_21M	3	FALSE	R
2020A-D3-2020-01-28-R18	2020A-D3	13	13_F	NCC_20M	4	FALSE	R
2020A-D3-2020-01-28-R5	2020A-D3	13	13_F	MASL081019RY	1	FALSE	R
2020A-D3-2020-01-28-R5	2020A-D3	13	13_F	13_P	2	TRUE	R
2020A-D3-2020-01-28-R5	2020A-D3	13	13_F	BRKR210519RY	3	FALSE	R
2020A-D3-2020-01-28-R5	2020A-D3	13	13_F	NCC_20M	4	FALSE	R
2020A-D3-2020-01-28-R19	2020A-D3	13	13_F	13_P	1	TRUE	R
2020A-D3-2020-01-28-R19	2020A-D3	13	13_F	NCC_16M	2	FALSE	R
2020A-D3-2020-01-28-R19	2020A-D3	13	13_F	NCC_17M	3	FALSE	R
2020A-D3-2020-01-28-R19	2020A-D3	13	13_F	HOTO020919RY	4	FALSE	R
2020A-D3-2020-01-28-R3	2020A-D3	13	13_F	MASL081019RY	1	FALSE	R
2020A-D3-2020-01-28-R3	2020A-D3	13	13_F	13_P	2	TRUE	R
2020A-D3-2020-01-28-R3	2020A-D3	13	13_F	PESV051119RY	3	FALSE	R
2020A-D3-2020-01-28-R3	2020A-D3	13	13_F	O#41M	4	FALSE	R
2020A-D3-2020-01-28-R7	2020A-D3	13	13_F	NCC_18M	1	FALSE	R
2020A-D3-2020-01-28-R7	2020A-D3	13	13_F	13_P	2	TRUE	R
2020A-D3-2020-01-28-R7	2020A-D3	13	13_F	NCC_21M	3	FALSE	R
2020A-D3-2020-01-28-R7	2020A-D3	13	13_F	NCC_16M	4	FALSE	R
2020A-D3-2020-01-28-R8	2020A-D3	13	13_F	NCC_17M	1	FALSE	R
2020A-D3-2020-01-28-R8	2020A-D3	13	13_F	KAKS300419RY	2	FALSE	R
2020A-D3-2020-01-28-R8	2020A-D3	13	13_F	13_P	3	TRUE	R
2020A-D3-2020-01-28-R8	2020A-D3	13	13_F	22MDS	4	FALSE	R
2020A-D3-2020-01-28-R12	2020A-D3	13	13_F	13_P	1	TRUE	R
2020A-D3-2020-01-28-R12	2020A-D3	13	13_F	NCC_25M	2	FALSE	R
2020A-D3-2020-01-28-R12	2020A-D3	13	13_F	NCC_17M	3	FALSE	R
2020A-D3-2020-01-28-R12	2020A-D3	13	13_F	MASL081019RY	4	FALSE	R
2020A-D4-2020-01-29-R4	2020A-D4	14	14_F	NCC_25M	1	FALSE	L
2020A-D4-2020-01-29-R4	2020A-D4	14	14_F	O#41M	2	FALSE	L
2020A-D4-2020-01-29-R4	2020A-D4	14	14_F	14_P	3	TRUE	L
2020A-D4-2020-01-29-R4	2020A-D4	14	14_F	ALSK230419RY	4	FALSE	L
2020A-D4-2020-01-29-R10	2020A-D4	14	14_F	NCC_20M	1	FALSE	L
2020A-D4-2020-01-29-R10	2020A-D4	14	14_F	KRVA121119RY	2	FALSE	L
2020A-D4-2020-01-29-R10	2020A-D4	14	14_F	14_P	3	TRUE	L
2020A-D4-2020-01-29-R10	2020A-D4	14	14_F	DEMA191119RY	4	FALSE	L
2020A-D4-2020-01-29-R11	2020A-D4	14	14_F	DAPR261119RY	1	FALSE	L
2020A-D4-2020-01-29-R11	2020A-D4	14	14_F	14_P	2	TRUE	L
2020A-D4-2020-01-29-R11	2020A-D4	14	14_F	SANA020419RY	3	FALSE	L
2020A-D4-2020-01-29-R11	2020A-D4	14	14_F	O#41M	4	FALSE	L
2020A-D4-2020-01-29-R15	2020A-D4	14	14_F	LUKU100919RY	1	FALSE	L
2020A-D4-2020-01-29-R15	2020A-D4	14	14_F	14_P	2	TRUE	L
2020A-D4-2020-01-29-R15	2020A-D4	14	14_F	NCC_21M	3	FALSE	L
2020A-D4-2020-01-29-R15	2020A-D4	14	14_F	STON300919RY	4	FALSE	L
2020A-D4-2020-01-29-R9	2020A-D4	14	14_F	NCC_25M	1	FALSE	L
2020A-D4-2020-01-29-R9	2020A-D4	14	14_F	NCC_21M	2	FALSE	L
2020A-D4-2020-01-29-R9	2020A-D4	14	14_F	TEHA100919RY	3	FALSE	L
2020A-D4-2020-01-29-R9	2020A-D4	14	14_F	14_P	4	TRUE	L
2020A-D4-2020-01-29-R16	2020A-D4	14	14_F	ALSK230419RY	1	FALSE	L
2020A-D4-2020-01-29-R16	2020A-D4	14	14_F	MIAN051119RY	2	FALSE	L
2020A-D4-2020-01-29-R16	2020A-D4	14	14_F	14_P	3	TRUE	L
2020A-D4-2020-01-29-R16	2020A-D4	14	14_F	KRVA121119RY	4	FALSE	L
2020A-D4-2020-01-29-R22	2020A-D4	14	14_F	14_P	1	TRUE	L
2020A-D4-2020-01-29-R22	2020A-D4	14	14_F	NCC_25M	2	FALSE	L
2020A-D4-2020-01-29-R22	2020A-D4	14	14_F	LUKU100919RY	3	FALSE	L
2020A-D4-2020-01-29-R22	2020A-D4	14	14_F	KRVA121119RY	4	FALSE	L
2020A-D4-2020-01-29-R24	2020A-D4	14	14_F	ALSK230419RY	1	FALSE	L
2020A-D4-2020-01-29-R24	2020A-D4	14	14_F	ANPA300919RY	2	FALSE	L
2020A-D4-2020-01-29-R24	2020A-D4	14	14_F	14_P	3	TRUE	L
2020A-D4-2020-01-29-R24	2020A-D4	14	14_F	NHFE051119RY	4	FALSE	L
2020A-D4-2020-01-29-R25	2020A-D4	14	14_F	ALSK230419RY	1	FALSE	L
2020A-D4-2020-01-29-R25	2020A-D4	14	14_F	MIAN051119RY	2	FALSE	L
2020A-D4-2020-01-29-R25	2020A-D4	14	14_F	NCC_28M	3	FALSE	L
2020A-D4-2020-01-29-R25	2020A-D4	14	14_F	14_P	4	TRUE	L
2020A-D4-2020-01-29-R13	2020A-D4	14	14_F	NCC_25M	1	FALSE	L
2020A-D4-2020-01-29-R13	2020A-D4	14	14_F	LUKU100919RY	2	FALSE	L
2020A-D4-2020-01-29-R13	2020A-D4	14	14_F	14_P	3	TRUE	L
2020A-D4-2020-01-29-R13	2020A-D4	14	14_F	KRVA121119RY	4	FALSE	L
2020A-D4-2020-01-29-R20	2020A-D4	14	14_F	14_P	1	TRUE	L
2020A-D4-2020-01-29-R20	2020A-D4	14	14_F	TEHA100919RY	2	FALSE	L
2020A-D4-2020-01-29-R20	2020A-D4	14	14_F	DEMA191119RY	3	FALSE	L
2020A-D4-2020-01-29-R20	2020A-D4	14	14_F	DAPR261119RY	4	FALSE	L
2020A-D4-2020-01-29-R23	2020A-D4	14	14_F	NCC_20M	1	FALSE	L
2020A-D4-2020-01-29-R23	2020A-D4	14	14_F	DAPR261119RY	2	FALSE	L
2020A-D4-2020-01-29-R23	2020A-D4	14	14_F	14_P	3	TRUE	L
2020A-D4-2020-01-29-R23	2020A-D4	14	14_F	MIAN051119RY	4	FALSE	L
2020A-D4-2020-01-29-R3	2020A-D4	14	14_F	14_P	1	TRUE	L
2020A-D4-2020-01-29-R3	2020A-D4	14	14_F	NCC_18M	2	FALSE	L
2020A-D4-2020-01-29-R3	2020A-D4	14	14_F	LUKU100919RY	3	FALSE	L
2020A-D4-2020-01-29-R3	2020A-D4	14	14_F	STON300919RY	4	FALSE	L
2020A-D4-2020-01-29-R5	2020A-D4	14	14_F	SANA020419RY	1	FALSE	L
2020A-D4-2020-01-29-R5	2020A-D4	14	14_F	14_P	2	TRUE	L
2020A-D4-2020-01-29-R5	2020A-D4	14	14_F	KRVA121119RY	3	FALSE	L
2020A-D4-2020-01-29-R5	2020A-D4	14	14_F	DEMA191119RY	4	FALSE	L
2020A-D4-2020-01-29-R7	2020A-D4	14	14_F	14_P	1	TRUE	L
2020A-D4-2020-01-29-R7	2020A-D4	14	14_F	LUKU100919RY	2	FALSE	L
2020A-D4-2020-01-29-R7	2020A-D4	14	14_F	NCC_21M	3	FALSE	L
2020A-D4-2020-01-29-R7	2020A-D4	14	14_F	NCC_25M	4	FALSE	L
2020A-D4-2020-01-29-R8	2020A-D4	14	14_F	DEMA191119RY	1	FALSE	L
2020A-D4-2020-01-29-R8	2020A-D4	14	14_F	DAPR261119RY	2	FALSE	L
2020A-D4-2020-01-29-R8	2020A-D4	14	14_F	14_P	3	TRUE	L
2020A-D4-2020-01-29-R8	2020A-D4	14	14_F	SANA020419RY	4	FALSE	L
2020A-D4-2020-01-29-R17	2020A-D4	14	14_F	14_P	1	TRUE	L
2020A-D4-2020-01-29-R17	2020A-D4	14	14_F	NCC_21M	2	FALSE	L
2020A-D4-2020-01-29-R17	2020A-D4	14	14_F	KABK100919RY	3	FALSE	L
2020A-D4-2020-01-29-R17	2020A-D4	14	14_F	DAPR261119RY	4	FALSE	L
2020A-D4-2020-01-29-R21	2020A-D4	14	14_F	14_P	1	TRUE	L
2020A-D4-2020-01-29-R21	2020A-D4	14	14_F	MIAN051119RY	2	FALSE	L
2020A-D4-2020-01-29-R21	2020A-D4	14	14_F	ALSK230419RY	3	FALSE	L
2020A-D4-2020-01-29-R21	2020A-D4	14	14_F	NCC_18M	4	FALSE	L
2020A-D4-2020-01-29-R1	2020A-D4	14	14_F	ANPA300919RY	1	FALSE	L
2020A-D4-2020-01-29-R1	2020A-D4	14	14_F	ALSK230419RY	2	FALSE	L
2020A-D4-2020-01-29-R1	2020A-D4	14	14_F	NCC_25M	3	FALSE	L
2020A-D4-2020-01-29-R1	2020A-D4	14	14_F	14_P	4	TRUE	L
2020A-D4-2020-01-29-R6	2020A-D4	14	14_F	NCC_21M	1	FALSE	L
2020A-D4-2020-01-29-R6	2020A-D4	14	14_F	14_P	2	TRUE	L
2020A-D4-2020-01-29-R6	2020A-D4	14	14_F	ALSK230419RY	3	FALSE	L
2020A-D4-2020-01-29-R6	2020A-D4	14	14_F	NHFE051119RY	4	FALSE	L
2020A-D4-2020-01-29-R14	2020A-D4	14	14_F	ANPA300919RY	1	FALSE	L
2020A-D4-2020-01-29-R14	2020A-D4	14	14_F	NCC_21M	2	FALSE	L
2020A-D4-2020-01-29-R14	2020A-D4	14	14_F	14_P	3	TRUE	L
2020A-D4-2020-01-29-R14	2020A-D4	14	14_F	TEHA100919RY	4	FALSE	L
2020A-D4-2020-01-29-R18	2020A-D4	14	14_F	14_P	1	TRUE	L
2020A-D4-2020-01-29-R18	2020A-D4	14	14_F	O#41M	2	FALSE	L
2020A-D4-2020-01-29-R18	2020A-D4	14	14_F	ALSK230419RY	3	FALSE	L
2020A-D4-2020-01-29-R18	2020A-D4	14	14_F	ANPA300919RY	4	FALSE	L
2020A-D4-2020-01-29-R19	2020A-D4	14	14_F	DAPR261119RY	1	FALSE	L
2020A-D4-2020-01-29-R19	2020A-D4	14	14_F	O#41M	2	FALSE	L
2020A-D4-2020-01-29-R19	2020A-D4	14	14_F	14_P	3	TRUE	L
2020A-D4-2020-01-29-R19	2020A-D4	14	14_F	KABK100919RY	4	FALSE	L
2020A-D4-2020-01-29-R12	2020A-D4	14	14_F	NCC_21M	1	FALSE	L
2020A-D4-2020-01-29-R12	2020A-D4	14	14_F	14_P	2	TRUE	L
2020A-D4-2020-01-29-R12	2020A-D4	14	14_F	KRVA121119RY	3	FALSE	L
2020A-D4-2020-01-29-R12	2020A-D4	14	14_F	KABK100919RY	4	FALSE	L
2020A-D4-2020-01-29-R26	2020A-D4	14	14_F	14_P	1	TRUE	L
2020A-D4-2020-01-29-R26	2020A-D4	14	14_F	NCC_25M	2	FALSE	L
2020A-D4-2020-01-29-R26	2020A-D4	14	14_F	SANA020419RY	3	FALSE	L
2020A-D4-2020-01-29-R26	2020A-D4	14	14_F	O#41M	4	FALSE	L
2020A-D4-2020-01-29-R9	2020A-D4	15	15_F	NCC_20M	1	FALSE	L
2020A-D4-2020-01-29-R9	2020A-D4	15	15_F	15_P	2	TRUE	L
2020A-D4-2020-01-29-R9	2020A-D4	15	15_F	NCC_28M	3	FALSE	L
2020A-D4-2020-01-29-R9	2020A-D4	15	15_F	DEMA191119RY	4	FALSE	L
2020A-D4-2020-01-29-R18	2020A-D4	15	15_F	DAPR261119RY	1	FALSE	L
2020A-D4-2020-01-29-R18	2020A-D4	15	15_F	TEHA100919RY	2	FALSE	L
2020A-D4-2020-01-29-R18	2020A-D4	15	15_F	KRVA121119RY	3	FALSE	L
2020A-D4-2020-01-29-R18	2020A-D4	15	15_F	15_P	4	TRUE	L
2020A-D4-2020-01-29-R22	2020A-D4	15	15_F	NCC_28M	1	FALSE	L
2020A-D4-2020-01-29-R22	2020A-D4	15	15_F	TEHA100919RY	2	FALSE	L
2020A-D4-2020-01-29-R22	2020A-D4	15	15_F	MIAN051119RY	3	FALSE	L
2020A-D4-2020-01-29-R22	2020A-D4	15	15_F	15_P	4	TRUE	L
2020A-D4-2020-01-29-R24	2020A-D4	15	15_F	15_P	1	TRUE	L
2020A-D4-2020-01-29-R24	2020A-D4	15	15_F	MIAN051119RY	2	FALSE	L
2020A-D4-2020-01-29-R24	2020A-D4	15	15_F	KRVA121119RY	3	FALSE	L
2020A-D4-2020-01-29-R24	2020A-D4	15	15_F	LUKU100919RY	4	FALSE	L
2020A-D4-2020-01-29-R26	2020A-D4	15	15_F	DAPR261119RY	1	FALSE	L
2020A-D4-2020-01-29-R26	2020A-D4	15	15_F	ANPA300919RY	2	FALSE	L
2020A-D4-2020-01-29-R26	2020A-D4	15	15_F	ALSK230419RY	3	FALSE	L
2020A-D4-2020-01-29-R26	2020A-D4	15	15_F	15_P	4	TRUE	L
2020A-D4-2020-01-29-R6	2020A-D4	15	15_F	15_P	1	TRUE	L
2020A-D4-2020-01-29-R6	2020A-D4	15	15_F	SANA020419RY	2	FALSE	L
2020A-D4-2020-01-29-R6	2020A-D4	15	15_F	NCC_25M	3	FALSE	L
2020A-D4-2020-01-29-R6	2020A-D4	15	15_F	DEMA191119RY	4	FALSE	L
2020A-D4-2020-01-29-R7	2020A-D4	15	15_F	ALSK230419RY	1	FALSE	L
2020A-D4-2020-01-29-R7	2020A-D4	15	15_F	15_P	2	TRUE	L
2020A-D4-2020-01-29-R7	2020A-D4	15	15_F	NCC_18M	3	FALSE	L
2020A-D4-2020-01-29-R7	2020A-D4	15	15_F	STON300919RY	4	FALSE	L
2020A-D4-2020-01-29-R14	2020A-D4	15	15_F	NHFE051119RY	1	FALSE	L
2020A-D4-2020-01-29-R14	2020A-D4	15	15_F	15_P	2	TRUE	L
2020A-D4-2020-01-29-R14	2020A-D4	15	15_F	STON300919RY	3	FALSE	L
2020A-D4-2020-01-29-R14	2020A-D4	15	15_F	NCC_20M	4	FALSE	L
2020A-D4-2020-01-29-R21	2020A-D4	15	15_F	SANA020419RY	1	FALSE	L
2020A-D4-2020-01-29-R21	2020A-D4	15	15_F	15_P	2	TRUE	L
2020A-D4-2020-01-29-R21	2020A-D4	15	15_F	NCC_25M	3	FALSE	L
2020A-D4-2020-01-29-R21	2020A-D4	15	15_F	O#41M	4	FALSE	L
2020A-D4-2020-01-29-R4	2020A-D4	15	15_F	15_P	1	TRUE	L
2020A-D4-2020-01-29-R4	2020A-D4	15	15_F	NCC_18M	2	FALSE	L
2020A-D4-2020-01-29-R4	2020A-D4	15	15_F	TEHA100919RY	3	FALSE	L
2020A-D4-2020-01-29-R4	2020A-D4	15	15_F	NHFE051119RY	4	FALSE	L
2020A-D4-2020-01-29-R5	2020A-D4	15	15_F	KABK100919RY	1	FALSE	L
2020A-D4-2020-01-29-R5	2020A-D4	15	15_F	15_P	2	TRUE	L
2020A-D4-2020-01-29-R5	2020A-D4	15	15_F	NCC_25M	3	FALSE	L
2020A-D4-2020-01-29-R5	2020A-D4	15	15_F	ANPA300919RY	4	FALSE	L
2020A-D4-2020-01-29-R10	2020A-D4	15	15_F	15_P	1	TRUE	L
2020A-D4-2020-01-29-R10	2020A-D4	15	15_F	NCC_18M	2	FALSE	L
2020A-D4-2020-01-29-R10	2020A-D4	15	15_F	NHFE051119RY	3	FALSE	L
2020A-D4-2020-01-29-R10	2020A-D4	15	15_F	SANA020419RY	4	FALSE	L
2020A-D4-2020-01-29-R12	2020A-D4	15	15_F	15_P	1	TRUE	L
2020A-D4-2020-01-29-R12	2020A-D4	15	15_F	MIAN051119RY	2	FALSE	L
2020A-D4-2020-01-29-R12	2020A-D4	15	15_F	NCC_20M	3	FALSE	L
2020A-D4-2020-01-29-R12	2020A-D4	15	15_F	STON300919RY	4	FALSE	L
2020A-D4-2020-01-29-R11	2020A-D4	15	15_F	ALSK230419RY	1	FALSE	L
2020A-D4-2020-01-29-R11	2020A-D4	15	15_F	KRVA121119RY	2	FALSE	L
2020A-D4-2020-01-29-R11	2020A-D4	15	15_F	MIAN051119RY	3	FALSE	L
2020A-D4-2020-01-29-R11	2020A-D4	15	15_F	15_P	4	TRUE	L
2020A-D4-2020-01-29-R3	2020A-D4	15	15_F	ALSK230419RY	1	FALSE	L
2020A-D4-2020-01-29-R3	2020A-D4	15	15_F	15_P	2	TRUE	L
2020A-D4-2020-01-29-R3	2020A-D4	15	15_F	NCC_21M	3	FALSE	L
2020A-D4-2020-01-29-R3	2020A-D4	15	15_F	DEMA191119RY	4	FALSE	L
2020A-D4-2020-01-29-R15	2020A-D4	15	15_F	15_P	1	TRUE	L
2020A-D4-2020-01-29-R15	2020A-D4	15	15_F	DAPR261119RY	2	FALSE	L
2020A-D4-2020-01-29-R15	2020A-D4	15	15_F	NCC_28M	3	FALSE	L
2020A-D4-2020-01-29-R15	2020A-D4	15	15_F	TEHA100919RY	4	FALSE	L
2020A-D4-2020-01-29-R16	2020A-D4	15	15_F	LUKU100919RY	1	FALSE	L
2020A-D4-2020-01-29-R16	2020A-D4	15	15_F	O#41M	2	FALSE	L
2020A-D4-2020-01-29-R16	2020A-D4	15	15_F	15_P	3	TRUE	L
2020A-D4-2020-01-29-R16	2020A-D4	15	15_F	NCC_18M	4	FALSE	L
2020A-D4-2020-01-29-R23	2020A-D4	15	15_F	NCC_18M	1	FALSE	L
2020A-D4-2020-01-29-R23	2020A-D4	15	15_F	15_P	2	TRUE	L
2020A-D4-2020-01-29-R23	2020A-D4	15	15_F	ALSK230419RY	3	FALSE	L
2020A-D4-2020-01-29-R23	2020A-D4	15	15_F	KRVA121119RY	4	FALSE	L
2020A-D4-2020-01-29-R25	2020A-D4	15	15_F	15_P	1	TRUE	L
2020A-D4-2020-01-29-R25	2020A-D4	15	15_F	LUKU100919RY	2	FALSE	L
2020A-D4-2020-01-29-R25	2020A-D4	15	15_F	NCC_25M	3	FALSE	L
2020A-D4-2020-01-29-R25	2020A-D4	15	15_F	NHFE051119RY	4	FALSE	L
2020A-D4-2020-01-29-R1	2020A-D4	15	15_F	15_P	1	TRUE	L
2020A-D4-2020-01-29-R1	2020A-D4	15	15_F	NCC_20M	2	FALSE	L
2020A-D4-2020-01-29-R1	2020A-D4	15	15_F	O#41M	3	FALSE	L
2020A-D4-2020-01-29-R1	2020A-D4	15	15_F	KRVA121119RY	4	FALSE	L
2020A-D4-2020-01-29-R8	2020A-D4	15	15_F	15_P	1	TRUE	L
2020A-D4-2020-01-29-R8	2020A-D4	15	15_F	ANPA300919RY	2	FALSE	L
2020A-D4-2020-01-29-R8	2020A-D4	15	15_F	NCC_18M	3	FALSE	L
2020A-D4-2020-01-29-R8	2020A-D4	15	15_F	NCC_20M	4	FALSE	L
2020A-D4-2020-01-29-R13	2020A-D4	15	15_F	15_P	1	TRUE	L
2020A-D4-2020-01-29-R13	2020A-D4	15	15_F	DEMA191119RY	2	FALSE	L
2020A-D4-2020-01-29-R13	2020A-D4	15	15_F	MIAN051119RY	3	FALSE	L
2020A-D4-2020-01-29-R13	2020A-D4	15	15_F	ALSK230419RY	4	FALSE	L
2020A-D4-2020-01-29-R17	2020A-D4	15	15_F	DEMA191119RY	1	FALSE	L
2020A-D4-2020-01-29-R17	2020A-D4	15	15_F	15_P	2	TRUE	L
2020A-D4-2020-01-29-R17	2020A-D4	15	15_F	O#41M	3	FALSE	L
2020A-D4-2020-01-29-R17	2020A-D4	15	15_F	NCC_20M	4	FALSE	L
2020A-D4-2020-01-29-R19	2020A-D4	15	15_F	NHFE051119RY	1	FALSE	L
2020A-D4-2020-01-29-R19	2020A-D4	15	15_F	DEMA191119RY	2	FALSE	L
2020A-D4-2020-01-29-R19	2020A-D4	15	15_F	15_P	3	TRUE	L
2020A-D4-2020-01-29-R19	2020A-D4	15	15_F	NCC_20M	4	FALSE	L
2020A-D4-2020-01-29-R20	2020A-D4	15	15_F	ANPA300919RY	1	FALSE	L
2020A-D4-2020-01-29-R20	2020A-D4	15	15_F	NCC_20M	2	FALSE	L
2020A-D4-2020-01-29-R20	2020A-D4	15	15_F	NHFE051119RY	3	FALSE	L
2020A-D4-2020-01-29-R20	2020A-D4	15	15_F	15_P	4	TRUE	L
2020A-D3-2020-01-28-R1	2020A-D3	16	16_F	16_P	1	TRUE	R
2020A-D3-2020-01-28-R1	2020A-D3	16	16_F	ZACH101219RY	2	FALSE	R
2020A-D3-2020-01-28-R1	2020A-D3	16	16_F	KAKS300419RY	3	FALSE	R
2020A-D3-2020-01-28-R1	2020A-D3	16	16_F	BRKR210519RY	4	FALSE	R
2020A-D3-2020-01-28-R7	2020A-D3	16	16_F	NCC_28M	1	FALSE	R
2020A-D3-2020-01-28-R7	2020A-D3	16	16_F	KAKS300419RY	2	FALSE	R
2020A-D3-2020-01-28-R7	2020A-D3	16	16_F	16_P	3	TRUE	R
2020A-D3-2020-01-28-R7	2020A-D3	16	16_F	22MDS	4	FALSE	R
2020A-D3-2020-01-28-R10	2020A-D3	16	16_F	NCC_25M	1	FALSE	R
2020A-D3-2020-01-28-R10	2020A-D3	16	16_F	NCC_12M	2	FALSE	R
2020A-D3-2020-01-28-R10	2020A-D3	16	16_F	NCC_28M	3	FALSE	R
2020A-D3-2020-01-28-R10	2020A-D3	16	16_F	16_P	4	TRUE	R
2020A-D3-2020-01-28-R15	2020A-D3	16	16_F	MASL081019RY	1	FALSE	R
2020A-D3-2020-01-28-R15	2020A-D3	16	16_F	16_P	2	TRUE	R
2020A-D3-2020-01-28-R15	2020A-D3	16	16_F	BRKR210519RY	3	FALSE	R
2020A-D3-2020-01-28-R15	2020A-D3	16	16_F	PESV051119RY	4	FALSE	R
2020A-D3-2020-01-28-R5	2020A-D3	16	16_F	NCC_12M	1	FALSE	R
2020A-D3-2020-01-28-R5	2020A-D3	16	16_F	16_P	2	TRUE	R
2020A-D3-2020-01-28-R5	2020A-D3	16	16_F	ROME041119RY	3	FALSE	R
2020A-D3-2020-01-28-R5	2020A-D3	16	16_F	O#41M	4	FALSE	R
2020A-D3-2020-01-28-R11	2020A-D3	16	16_F	NCC_21M	1	FALSE	R
2020A-D3-2020-01-28-R11	2020A-D3	16	16_F	KAKS300419RY	2	FALSE	R
2020A-D3-2020-01-28-R11	2020A-D3	16	16_F	16_P	3	TRUE	R
2020A-D3-2020-01-28-R11	2020A-D3	16	16_F	ROME041119RY	4	FALSE	R
2020A-D3-2020-01-28-R12	2020A-D3	16	16_F	16_P	1	TRUE	R
2020A-D3-2020-01-28-R12	2020A-D3	16	16_F	NCC_20M	2	FALSE	R
2020A-D3-2020-01-28-R12	2020A-D3	16	16_F	ZACH101219RY	3	FALSE	R
2020A-D3-2020-01-28-R12	2020A-D3	16	16_F	HOTO020919RY	4	FALSE	R
2020A-D3-2020-01-28-R14	2020A-D3	16	16_F	16_P	1	TRUE	R
2020A-D3-2020-01-28-R14	2020A-D3	16	16_F	TURA171219RY	2	FALSE	R
2020A-D3-2020-01-28-R14	2020A-D3	16	16_F	O#41M	3	FALSE	R
2020A-D3-2020-01-28-R14	2020A-D3	16	16_F	NCC_12M	4	FALSE	R
2020A-D3-2020-01-28-R16	2020A-D3	16	16_F	16_P	1	TRUE	R
2020A-D3-2020-01-28-R16	2020A-D3	16	16_F	NCC_12M	2	FALSE	R
2020A-D3-2020-01-28-R16	2020A-D3	16	16_F	O#41M	3	FALSE	R
2020A-D3-2020-01-28-R16	2020A-D3	16	16_F	TURA171219RY	4	FALSE	R
2020A-D3-2020-01-28-R19	2020A-D3	16	16_F	16_P	1	TRUE	R
2020A-D3-2020-01-28-R19	2020A-D3	16	16_F	ROME041119RY	2	FALSE	R
2020A-D3-2020-01-28-R19	2020A-D3	16	16_F	NCC_21M	3	FALSE	R
2020A-D3-2020-01-28-R19	2020A-D3	16	16_F	ZACH101219RY	4	FALSE	R
2020A-D3-2020-01-28-R6	2020A-D3	16	16_F	NCC_12M	1	FALSE	R
2020A-D3-2020-01-28-R6	2020A-D3	16	16_F	16_P	2	TRUE	R
2020A-D3-2020-01-28-R6	2020A-D3	16	16_F	TURA171219RY	3	FALSE	R
2020A-D3-2020-01-28-R6	2020A-D3	16	16_F	O#41M	4	FALSE	R
2020A-D3-2020-01-28-R8	2020A-D3	16	16_F	TURA171219RY	1	FALSE	R
2020A-D3-2020-01-28-R8	2020A-D3	16	16_F	16_P	2	TRUE	R
2020A-D3-2020-01-28-R8	2020A-D3	16	16_F	NCC_28M	3	FALSE	R
2020A-D3-2020-01-28-R8	2020A-D3	16	16_F	NCC_21M	4	FALSE	R
2020A-D3-2020-01-28-R13	2020A-D3	16	16_F	NCC_25M	1	FALSE	R
2020A-D3-2020-01-28-R13	2020A-D3	16	16_F	16_P	2	TRUE	R
2020A-D3-2020-01-28-R13	2020A-D3	16	16_F	NCC_20M	3	FALSE	R
2020A-D3-2020-01-28-R13	2020A-D3	16	16_F	MASL081019RY	4	FALSE	R
2020A-D3-2020-01-28-R18	2020A-D3	16	16_F	TURA171219RY	1	FALSE	R
2020A-D3-2020-01-28-R18	2020A-D3	16	16_F	16_P	2	TRUE	R
2020A-D3-2020-01-28-R18	2020A-D3	16	16_F	ROME041119RY	3	FALSE	R
2020A-D3-2020-01-28-R18	2020A-D3	16	16_F	BRKR210519RY	4	FALSE	R
2020A-D3-2020-01-28-R3	2020A-D3	16	16_F	16_P	1	TRUE	R
2020A-D3-2020-01-28-R3	2020A-D3	16	16_F	BRKR210519RY	2	FALSE	R
2020A-D3-2020-01-28-R3	2020A-D3	16	16_F	ZACH101219RY	3	FALSE	R
2020A-D3-2020-01-28-R3	2020A-D3	16	16_F	NCC_20M	4	FALSE	R
2020A-D3-2020-01-28-R17	2020A-D3	16	16_F	16_P	1	TRUE	R
2020A-D3-2020-01-28-R17	2020A-D3	16	16_F	NCC_18M	2	FALSE	R
2020A-D3-2020-01-28-R17	2020A-D3	16	16_F	O#41M	3	FALSE	R
2020A-D3-2020-01-28-R17	2020A-D3	16	16_F	NCC_16M	4	FALSE	R
2020A-D3-2020-01-28-R20	2020A-D3	16	16_F	NCC_16M	1	FALSE	R
2020A-D3-2020-01-28-R20	2020A-D3	16	16_F	16_P	2	TRUE	R
2020A-D3-2020-01-28-R20	2020A-D3	16	16_F	NCC_21M	3	FALSE	R
2020A-D3-2020-01-28-R20	2020A-D3	16	16_F	NCC_20M	4	FALSE	R
2020A-D3-2020-01-28-R2	2020A-D3	16	16_F	16_P	1	TRUE	R
2020A-D3-2020-01-28-R2	2020A-D3	16	16_F	NCC_12M	2	FALSE	R
2020A-D3-2020-01-28-R2	2020A-D3	16	16_F	O#41M	3	FALSE	R
2020A-D3-2020-01-28-R2	2020A-D3	16	16_F	NCC_20M	4	FALSE	R
2020A-D3-2020-01-28-R9	2020A-D3	16	16_F	16_P	1	TRUE	R
2020A-D3-2020-01-28-R9	2020A-D3	16	16_F	KAKS300419RY	2	FALSE	R
2020A-D3-2020-01-28-R9	2020A-D3	16	16_F	TURA171219RY	3	FALSE	R
2020A-D3-2020-01-28-R9	2020A-D3	16	16_F	BRKR210519RY	4	FALSE	R
2020A-D3-2020-01-28-R4	2020A-D3	16	16_F	16_P	1	TRUE	R
2020A-D3-2020-01-28-R4	2020A-D3	16	16_F	KAKS300419RY	2	FALSE	R
2020A-D3-2020-01-28-R4	2020A-D3	16	16_F	ROME041119RY	3	FALSE	R
2020A-D3-2020-01-28-R4	2020A-D3	16	16_F	22MDS	4	FALSE	R
2020A-D3-2020-01-28-R2	2020A-D3	17	17_F	17_P	1	TRUE	R
2020A-D3-2020-01-28-R2	2020A-D3	17	17_F	ROME041119RY	2	FALSE	R
2020A-D3-2020-01-28-R2	2020A-D3	17	17_F	TURA171219RY	3	FALSE	R
2020A-D3-2020-01-28-R2	2020A-D3	17	17_F	22MDS	4	FALSE	R
2020A-D3-2020-01-28-R8	2020A-D3	17	17_F	17_P	1	TRUE	R
2020A-D3-2020-01-28-R8	2020A-D3	17	17_F	HOTO020919RY	2	FALSE	R
2020A-D3-2020-01-28-R8	2020A-D3	17	17_F	PESV051119RY	3	FALSE	R
2020A-D3-2020-01-28-R8	2020A-D3	17	17_F	NCC_20M	4	FALSE	R
2020A-D3-2020-01-28-R12	2020A-D3	17	17_F	NCC_12M	1	FALSE	R
2020A-D3-2020-01-28-R12	2020A-D3	17	17_F	BRKR210519RY	2	FALSE	R
2020A-D3-2020-01-28-R12	2020A-D3	17	17_F	ROME041119RY	3	FALSE	R
2020A-D3-2020-01-28-R12	2020A-D3	17	17_F	17_P	4	TRUE	R
2020A-D3-2020-01-28-R16	2020A-D3	17	17_F	ZACH101219RY	1	FALSE	R
2020A-D3-2020-01-28-R16	2020A-D3	17	17_F	17_P	2	TRUE	R
2020A-D3-2020-01-28-R16	2020A-D3	17	17_F	BRKR210519RY	3	FALSE	R
2020A-D3-2020-01-28-R16	2020A-D3	17	17_F	PESV051119RY	4	FALSE	R
2020A-D3-2020-01-28-R17	2020A-D3	17	17_F	17_P	1	TRUE	R
2020A-D3-2020-01-28-R17	2020A-D3	17	17_F	ZACH101219RY	2	FALSE	R
2020A-D3-2020-01-28-R17	2020A-D3	17	17_F	TURA171219RY	3	FALSE	R
2020A-D3-2020-01-28-R17	2020A-D3	17	17_F	HOTO020919RY	4	FALSE	R
2020A-D3-2020-01-28-R19	2020A-D3	17	17_F	17_P	1	TRUE	R
2020A-D3-2020-01-28-R19	2020A-D3	17	17_F	NCC_28M	2	FALSE	R
2020A-D3-2020-01-28-R19	2020A-D3	17	17_F	BRKR210519RY	3	FALSE	R
2020A-D3-2020-01-28-R19	2020A-D3	17	17_F	NCC_20M	4	FALSE	R
2020A-D3-2020-01-28-R4	2020A-D3	17	17_F	17_P	1	TRUE	R
2020A-D3-2020-01-28-R4	2020A-D3	17	17_F	MASL081019RY	2	FALSE	R
2020A-D3-2020-01-28-R4	2020A-D3	17	17_F	NCC_25M	3	FALSE	R
2020A-D3-2020-01-28-R4	2020A-D3	17	17_F	NCC_28M	4	FALSE	R
2020A-D3-2020-01-28-R5	2020A-D3	17	17_F	NCC_18M	1	FALSE	R
2020A-D3-2020-01-28-R5	2020A-D3	17	17_F	TURA171219RY	2	FALSE	R
2020A-D3-2020-01-28-R5	2020A-D3	17	17_F	17_P	3	TRUE	R
2020A-D3-2020-01-28-R5	2020A-D3	17	17_F	NCC_25M	4	FALSE	R
2020A-D3-2020-01-28-R7	2020A-D3	17	17_F	17_P	1	TRUE	R
2020A-D3-2020-01-28-R7	2020A-D3	17	17_F	NCC_25M	2	FALSE	R
2020A-D3-2020-01-28-R7	2020A-D3	17	17_F	PESV051119RY	3	FALSE	R
2020A-D3-2020-01-28-R7	2020A-D3	17	17_F	NCC_20M	4	FALSE	R
2020A-D3-2020-01-28-R10	2020A-D3	17	17_F	ROME041119RY	1	FALSE	R
2020A-D3-2020-01-28-R10	2020A-D3	17	17_F	17_P	2	TRUE	R
2020A-D3-2020-01-28-R10	2020A-D3	17	17_F	NCC_16M	3	FALSE	R
2020A-D3-2020-01-28-R10	2020A-D3	17	17_F	O#41M	4	FALSE	R
2020A-D3-2020-01-28-R13	2020A-D3	17	17_F	17_P	1	TRUE	R
2020A-D3-2020-01-28-R13	2020A-D3	17	17_F	NCC_21M	2	FALSE	R
2020A-D3-2020-01-28-R13	2020A-D3	17	17_F	KAKS300419RY	3	FALSE	R
2020A-D3-2020-01-28-R13	2020A-D3	17	17_F	NCC_18M	4	FALSE	R
2020A-D3-2020-01-28-R1	2020A-D3	17	17_F	17_P	1	TRUE	R
2020A-D3-2020-01-28-R1	2020A-D3	17	17_F	NCC_21M	2	FALSE	R
2020A-D3-2020-01-28-R1	2020A-D3	17	17_F	NCC_28M	3	FALSE	R
2020A-D3-2020-01-28-R1	2020A-D3	17	17_F	NCC_17M	4	FALSE	R
2020A-D3-2020-01-28-R3	2020A-D3	17	17_F	TURA171219RY	1	FALSE	R
2020A-D3-2020-01-28-R3	2020A-D3	17	17_F	NCC_21M	2	FALSE	R
2020A-D3-2020-01-28-R3	2020A-D3	17	17_F	17_P	3	TRUE	R
2020A-D3-2020-01-28-R3	2020A-D3	17	17_F	NCC_28M	4	FALSE	R
2020A-D3-2020-01-28-R11	2020A-D3	17	17_F	TURA171219RY	1	FALSE	R
2020A-D3-2020-01-28-R11	2020A-D3	17	17_F	NCC_28M	2	FALSE	R
2020A-D3-2020-01-28-R11	2020A-D3	17	17_F	17_P	3	TRUE	R
2020A-D3-2020-01-28-R11	2020A-D3	17	17_F	22MDS	4	FALSE	R
2020A-D3-2020-01-28-R14	2020A-D3	17	17_F	NCC_18M	1	FALSE	R
2020A-D3-2020-01-28-R14	2020A-D3	17	17_F	NCC_28M	2	FALSE	R
2020A-D3-2020-01-28-R14	2020A-D3	17	17_F	BRKR210519RY	3	FALSE	R
2020A-D3-2020-01-28-R14	2020A-D3	17	17_F	17_P	4	TRUE	R
2020A-D3-2020-01-28-R6	2020A-D3	17	17_F	17_P	1	TRUE	R
2020A-D3-2020-01-28-R6	2020A-D3	17	17_F	BRKR210519RY	2	FALSE	R
2020A-D3-2020-01-28-R6	2020A-D3	17	17_F	PESV051119RY	3	FALSE	R
2020A-D3-2020-01-28-R6	2020A-D3	17	17_F	NCC_17M	4	FALSE	R
2020A-D3-2020-01-28-R9	2020A-D3	17	17_F	ROME041119RY	1	FALSE	R
2020A-D3-2020-01-28-R9	2020A-D3	17	17_F	NCC_18M	2	FALSE	R
2020A-D3-2020-01-28-R9	2020A-D3	17	17_F	17_P	3	TRUE	R
2020A-D3-2020-01-28-R9	2020A-D3	17	17_F	22MDS	4	FALSE	R
2020A-D3-2020-01-28-R15	2020A-D3	17	17_F	17_P	1	TRUE	R
2020A-D3-2020-01-28-R15	2020A-D3	17	17_F	NCC_28M	2	FALSE	R
2020A-D3-2020-01-28-R15	2020A-D3	17	17_F	O#41M	3	FALSE	R
2020A-D3-2020-01-28-R15	2020A-D3	17	17_F	NCC_20M	4	FALSE	R
2020A-D3-2020-01-28-R18	2020A-D3	17	17_F	17_P	1	TRUE	R
2020A-D3-2020-01-28-R18	2020A-D3	17	17_F	NCC_18M	2	FALSE	R
2020A-D3-2020-01-28-R18	2020A-D3	17	17_F	NCC_25M	3	FALSE	R
2020A-D3-2020-01-28-R18	2020A-D3	17	17_F	MASL081019RY	4	FALSE	R
2020A-D3-2020-01-28-R20	2020A-D3	17	17_F	17_P	1	TRUE	R
2020A-D3-2020-01-28-R20	2020A-D3	17	17_F	NCC_28M	2	FALSE	R
2020A-D3-2020-01-28-R20	2020A-D3	17	17_F	PESV051119RY	3	FALSE	R
2020A-D3-2020-01-28-R20	2020A-D3	17	17_F	22MDS	4	FALSE	R
2019B-D5-R1	2019B-D5	18	18_F	7MDSP	1	FALSE	R
2019B-D5-R1	2019B-D5	18	18_F	18_P	2	TRUE	R
2019B-D5-R1	2019B-D5	18	18_F	17MDS	3	FALSE	R
2019B-D5-R1	2019B-D5	18	18_F	NCC_14M	4	FALSE	R
2019B-D5-R2	2019B-D5	18	18_F	18_P	1	TRUE	R
2019B-D5-R2	2019B-D5	18	18_F	19MDS	2	FALSE	R
2019B-D5-R2	2019B-D5	18	18_F	NCC_19M	3	FALSE	R
2019B-D5-R2	2019B-D5	18	18_F	33_P	4	FALSE	R
2019B-D5-R3	2019B-D5	18	18_F	19MDS	1	FALSE	R
2019B-D5-R3	2019B-D5	18	18_F	18_P	2	TRUE	R
2019B-D5-R3	2019B-D5	18	18_F	NCC_19M	3	FALSE	R
2019B-D5-R3	2019B-D5	18	18_F	33_P	4	FALSE	R
2019B-D5-R4	2019B-D5	18	18_F	18_P	1	TRUE	R
2019B-D5-R4	2019B-D5	18	18_F	NCC_19M	2	FALSE	R
2019B-D5-R4	2019B-D5	18	18_F	33_P	3	FALSE	R
2019B-D5-R4	2019B-D5	18	18_F	16MDS	4	FALSE	R
2019B-D5-R5	2019B-D5	18	18_F	18_P	1	TRUE	R
2019B-D5-R5	2019B-D5	18	18_F	8MDSP	2	FALSE	R
2019B-D5-R5	2019B-D5	18	18_F	15MDS	3	FALSE	R
2019B-D5-R5	2019B-D5	18	18_F	16MDS	4	FALSE	R
2019B-D5-R6	2019B-D5	18	18_F	NCC_14M	1	FALSE	R
2019B-D5-R6	2019B-D5	18	18_F	18_P	2	TRUE	R
2019B-D5-R6	2019B-D5	18	18_F	33_P	3	FALSE	R
2019B-D5-R6	2019B-D5	18	18_F	16MDS	4	FALSE	R
2019B-D5-R7	2019B-D5	18	18_F	NCC_10M	1	FALSE	R
2019B-D5-R7	2019B-D5	18	18_F	17MDS	2	FALSE	R
2019B-D5-R7	2019B-D5	18	18_F	18_P	3	TRUE	R
2019B-D5-R7	2019B-D5	18	18_F	7MDSP	4	FALSE	R
2019B-D5-R8	2019B-D5	18	18_F	18_P	1	TRUE	R
2019B-D5-R8	2019B-D5	18	18_F	18MDS	2	FALSE	R
2019B-D5-R8	2019B-D5	18	18_F	NCC_14M	3	FALSE	R
2019B-D5-R8	2019B-D5	18	18_F	6MDSP	4	FALSE	R
2019B-D5-R9	2019B-D5	18	18_F	18_P	1	TRUE	R
2019B-D5-R9	2019B-D5	18	18_F	NCC_19M	2	FALSE	R
2019B-D5-R9	2019B-D5	18	18_F	02_P	3	FALSE	R
2019B-D5-R9	2019B-D5	18	18_F	NCC_11M	4	FALSE	R
2019B-D5-R10	2019B-D5	18	18_F	NCC_10M	1	FALSE	R
2019B-D5-R10	2019B-D5	18	18_F	18_P	2	TRUE	R
2019B-D5-R10	2019B-D5	18	18_F	02_P	3	FALSE	R
2019B-D5-R10	2019B-D5	18	18_F	15MDS	4	FALSE	R
2019B-D5-R11	2019B-D5	18	18_F	18_P	1	TRUE	R
2019B-D5-R11	2019B-D5	18	18_F	17MDS	2	FALSE	R
2019B-D5-R11	2019B-D5	18	18_F	NCC_19M	3	FALSE	R
2019B-D5-R11	2019B-D5	18	18_F	33_P	4	FALSE	R
2019B-D5-R12	2019B-D5	18	18_F	NCC_19M	1	FALSE	R
2019B-D5-R12	2019B-D5	18	18_F	15MDS	2	FALSE	R
2019B-D5-R12	2019B-D5	18	18_F	18_P	3	TRUE	R
2019B-D5-R12	2019B-D5	18	18_F	6MDSP	4	FALSE	R
2019B-D5-R13	2019B-D5	18	18_F	NCC_13M	1	FALSE	R
2019B-D5-R13	2019B-D5	18	18_F	NCC_19M	2	FALSE	R
2019B-D5-R13	2019B-D5	18	18_F	18_P	3	TRUE	R
2019B-D5-R13	2019B-D5	18	18_F	33_P	4	FALSE	R
2019B-D5-R14	2019B-D5	18	18_F	18_P	1	TRUE	R
2019B-D5-R14	2019B-D5	18	18_F	NCC_13M	2	FALSE	R
2019B-D5-R14	2019B-D5	18	18_F	8MDSP	3	FALSE	R
2019B-D5-R14	2019B-D5	18	18_F	16MDS	4	FALSE	R
2019B-D5-R15	2019B-D5	18	18_F	18_P	1	TRUE	R
2019B-D5-R15	2019B-D5	18	18_F	NCC_19M	2	FALSE	R
2019B-D5-R15	2019B-D5	18	18_F	NCC_13M	3	FALSE	R
2019B-D5-R15	2019B-D5	18	18_F	02_P	4	FALSE	R
2019B-D5-R16	2019B-D5	18	18_F	17MDS	1	FALSE	R
2019B-D5-R16	2019B-D5	18	18_F	18_P	2	TRUE	R
2019B-D5-R16	2019B-D5	18	18_F	18MDS	3	FALSE	R
2019B-D5-R16	2019B-D5	18	18_F	8MDSP	4	FALSE	R
2019B-D5-R17	2019B-D5	18	18_F	18_P	1	TRUE	R
2019B-D5-R17	2019B-D5	18	18_F	NCC_19M	2	FALSE	R
2019B-D5-R17	2019B-D5	18	18_F	NCC_11M	3	FALSE	R
2019B-D5-R17	2019B-D5	18	18_F	8MDSP	4	FALSE	R
2019B-D5-R18	2019B-D5	18	18_F	NCC_13M	1	FALSE	R
2019B-D5-R18	2019B-D5	18	18_F	17MDS	2	FALSE	R
2019B-D5-R18	2019B-D5	18	18_F	8MDSP	3	FALSE	R
2019B-D5-R18	2019B-D5	18	18_F	18_P	4	TRUE	R
2019B-D5-R19	2019B-D5	18	18_F	18_P	1	TRUE	R
2019B-D5-R19	2019B-D5	18	18_F	NCC_19M	2	FALSE	R
2019B-D5-R19	2019B-D5	18	18_F	NCC_11M	3	FALSE	R
2019B-D5-R19	2019B-D5	18	18_F	33_P	4	FALSE	R
2019B-D5-R20	2019B-D5	18	18_F	17MDS	1	FALSE	R
2019B-D5-R20	2019B-D5	18	18_F	18_P	2	TRUE	R
2019B-D5-R20	2019B-D5	18	18_F	NCC_11M	3	FALSE	R
2019B-D5-R20	2019B-D5	18	18_F	02_P	4	FALSE	R
2019B-D4-R1	2019B-D4	19	19_F	19_P	1	TRUE	L
2019B-D4-R1	2019B-D4	19	19_F	56_P	2	FALSE	L
2019B-D4-R1	2019B-D4	19	19_F	NCC_19M	3	FALSE	L
2019B-D4-R1	2019B-D4	19	19_F	NCC_22M	4	FALSE	L
2019B-D4-R2	2019B-D4	19	19_F	NCC_14M	1	FALSE	L
2019B-D4-R2	2019B-D4	19	19_F	39_P	2	FALSE	L
2019B-D4-R2	2019B-D4	19	19_F	NCC_13M	3	FALSE	L
2019B-D4-R2	2019B-D4	19	19_F	19_P	4	TRUE	L
2019B-D4-R3	2019B-D4	19	19_F	19_P	1	TRUE	L
2019B-D4-R3	2019B-D4	19	19_F	NCC_10M	2	FALSE	L
2019B-D4-R3	2019B-D4	19	19_F	NCC_24M	3	FALSE	L
2019B-D4-R3	2019B-D4	19	19_F	47_P	4	FALSE	L
2019B-D4-R4	2019B-D4	19	19_F	19_P	1	TRUE	L
2019B-D4-R4	2019B-D4	19	19_F	47_P	2	FALSE	L
2019B-D4-R4	2019B-D4	19	19_F	NCC_9M	3	FALSE	L
2019B-D4-R4	2019B-D4	19	19_F	NCC_22M	4	FALSE	L
2019B-D4-R5	2019B-D4	19	19_F	NCC_9M	1	FALSE	L
2019B-D4-R5	2019B-D4	19	19_F	19_P	2	TRUE	L
2019B-D4-R5	2019B-D4	19	19_F	45_P	3	FALSE	L
2019B-D4-R5	2019B-D4	19	19_F	O#12M	4	FALSE	L
2019B-D4-R6	2019B-D4	19	19_F	19_P	1	TRUE	L
2019B-D4-R6	2019B-D4	19	19_F	NCC_14M	2	FALSE	L
2019B-D4-R6	2019B-D4	19	19_F	45_P	3	FALSE	L
2019B-D4-R6	2019B-D4	19	19_F	NCC_10M	4	FALSE	L
2019B-D4-R7	2019B-D4	19	19_F	19_P	1	TRUE	L
2019B-D4-R7	2019B-D4	19	19_F	NCC_14M	2	FALSE	L
2019B-D4-R7	2019B-D4	19	19_F	45_P	3	FALSE	L
2019B-D4-R7	2019B-D4	19	19_F	O#12M	4	FALSE	L
2019B-D4-R8	2019B-D4	19	19_F	39_P	1	FALSE	L
2019B-D4-R8	2019B-D4	19	19_F	NCC_11M	2	FALSE	L
2019B-D4-R8	2019B-D4	19	19_F	O#12M	3	FALSE	L
2019B-D4-R8	2019B-D4	19	19_F	19_P	4	TRUE	L
2019B-D4-R9	2019B-D4	19	19_F	39_P	1	FALSE	L
2019B-D4-R9	2019B-D4	19	19_F	NCC_10M	2	FALSE	L
2019B-D4-R9	2019B-D4	19	19_F	NCC_9M	3	FALSE	L
2019B-D4-R9	2019B-D4	19	19_F	19_P	4	TRUE	L
2019B-D4-R10	2019B-D4	19	19_F	NCC_13M	1	FALSE	L
2019B-D4-R10	2019B-D4	19	19_F	19_P	2	TRUE	L
2019B-D4-R10	2019B-D4	19	19_F	07_P	3	FALSE	L
2019B-D4-R10	2019B-D4	19	19_F	NCC_24M	4	FALSE	L
2019B-D4-R11	2019B-D4	19	19_F	NCC_11M	1	FALSE	L
2019B-D4-R11	2019B-D4	19	19_F	19_P	2	TRUE	L
2019B-D4-R11	2019B-D4	19	19_F	NCC_9M	3	FALSE	L
2019B-D4-R11	2019B-D4	19	19_F	07_P	4	FALSE	L
2019B-D4-R12	2019B-D4	19	19_F	56_P	1	FALSE	L
2019B-D4-R12	2019B-D4	19	19_F	NCC_10M	2	FALSE	L
2019B-D4-R12	2019B-D4	19	19_F	19_P	3	TRUE	L
2019B-D4-R12	2019B-D4	19	19_F	NCC_11M	4	FALSE	L
2019B-D4-R13	2019B-D4	19	19_F	NCC_13M	1	FALSE	L
2019B-D4-R13	2019B-D4	19	19_F	19_P	2	TRUE	L
2019B-D4-R13	2019B-D4	19	19_F	56_P	3	FALSE	L
2019B-D4-R13	2019B-D4	19	19_F	NCC_14M	4	FALSE	L
2019B-D4-R14	2019B-D4	19	19_F	19_P	1	TRUE	L
2019B-D4-R14	2019B-D4	19	19_F	45_P	2	FALSE	L
2019B-D4-R14	2019B-D4	19	19_F	NCC_10M	3	FALSE	L
2019B-D4-R14	2019B-D4	19	19_F	O#12M	4	FALSE	L
2019B-D4-R15	2019B-D4	19	19_F	19_P	1	TRUE	L
2019B-D4-R15	2019B-D4	19	19_F	NCC_22M	2	FALSE	L
2019B-D4-R15	2019B-D4	19	19_F	07_P	3	FALSE	L
2019B-D4-R15	2019B-D4	19	19_F	NCC_24M	4	FALSE	L
2019B-D4-R16	2019B-D4	19	19_F	19_P	1	TRUE	L
2019B-D4-R16	2019B-D4	19	19_F	45_P	2	FALSE	L
2019B-D4-R16	2019B-D4	19	19_F	NCC_22M	3	FALSE	L
2019B-D4-R16	2019B-D4	19	19_F	NCC_11M	4	FALSE	L
2019B-D4-R17	2019B-D4	19	19_F	19_P	1	TRUE	L
2019B-D4-R17	2019B-D4	19	19_F	NCC_13M	2	FALSE	L
2019B-D4-R17	2019B-D4	19	19_F	07_P	3	FALSE	L
2019B-D4-R17	2019B-D4	19	19_F	NCC_24M	4	FALSE	L
2019B-D4-R18	2019B-D4	19	19_F	19_P	1	TRUE	L
2019B-D4-R18	2019B-D4	19	19_F	NCC_10M	2	FALSE	L
2019B-D4-R18	2019B-D4	19	19_F	07_P	3	FALSE	L
2019B-D4-R18	2019B-D4	19	19_F	NCC_13M	4	FALSE	L
2019B-D4-R19	2019B-D4	19	19_F	NCC_19M	1	FALSE	L
2019B-D4-R19	2019B-D4	19	19_F	NCC_10M	2	FALSE	L
2019B-D4-R19	2019B-D4	19	19_F	19_P	3	TRUE	L
2019B-D4-R19	2019B-D4	19	19_F	47_P	4	FALSE	L
2019B-D4-R20	2019B-D4	19	19_F	19_P	1	TRUE	L
2019B-D4-R20	2019B-D4	19	19_F	47_P	2	FALSE	L
2019B-D4-R20	2019B-D4	19	19_F	NCC_14M	3	FALSE	L
2019B-D4-R20	2019B-D4	19	19_F	NCC_24M	4	FALSE	L
2018A-27F290518	2018A-D2	20	20_F	20_P	1	TRUE	R
2018A-27F290518	2018A-D2	20	20_F	38_P	4	FALSE	R
2018A-27F290518	2018A-D2	20	20_F	NCC_49M	3	FALSE	R
2018A-27F290518	2018A-D2	20	20_F	NCC_51M	2	FALSE	R
2018A-28F290518	2018A-D2	20	20_F	20_P	2	TRUE	R
2018A-28F290518	2018A-D2	20	20_F	38_P	4	FALSE	R
2018A-28F290518	2018A-D2	20	20_F	NCC_49M	3	FALSE	R
2018A-28F290518	2018A-D2	20	20_F	NCC_51M	1	FALSE	R
2018A-29F290518	2018A-D2	20	20_F	20_P	2	TRUE	R
2018A-29F290518	2018A-D2	20	20_F	38_P	4	FALSE	R
2018A-29F290518	2018A-D2	20	20_F	NCC_49M	3	FALSE	R
2018A-29F290518	2018A-D2	20	20_F	NCC_51M	1	FALSE	R
2018A-30F290518	2018A-D2	20	20_F	20_P	2	TRUE	R
2018A-30F290518	2018A-D2	20	20_F	38_P	4	FALSE	R
2018A-30F290518	2018A-D2	20	20_F	NCC_49M	3	FALSE	R
2018A-30F290518	2018A-D2	20	20_F	NCC_51M	1	FALSE	R
2018A-31F290518	2018A-D2	20	20_F	20_P	1	TRUE	R
2018A-31F290518	2018A-D2	20	20_F	38_P	4	FALSE	R
2018A-31F290518	2018A-D2	20	20_F	NCC_49M	3	FALSE	R
2018A-31F290518	2018A-D2	20	20_F	NCC_51M	2	FALSE	R
2018A-32F290518	2018A-D2	20	20_F	20_P	4	TRUE	R
2018A-32F290518	2018A-D2	20	20_F	38_P	1	FALSE	R
2018A-32F290518	2018A-D2	20	20_F	NCC_49M	2	FALSE	R
2018A-32F290518	2018A-D2	20	20_F	NCC_51M	3	FALSE	R
2018A-33F290518	2018A-D2	20	20_F	20_P	4	TRUE	R
2018A-33F290518	2018A-D2	20	20_F	38_P	1	FALSE	R
2018A-33F290518	2018A-D2	20	20_F	NCC_49M	3	FALSE	R
2018A-33F290518	2018A-D2	20	20_F	NCC_51M	2	FALSE	R
2018A-34F290518	2018A-D2	20	20_F	20_P	2	TRUE	R
2018A-34F290518	2018A-D2	20	20_F	38_P	4	FALSE	R
2018A-34F290518	2018A-D2	20	20_F	NCC_49M	3	FALSE	R
2018A-34F290518	2018A-D2	20	20_F	NCC_51M	1	FALSE	R
2018A-35F290518	2018A-D2	20	20_F	20_P	1	TRUE	R
2018A-35F290518	2018A-D2	20	20_F	38_P	2	FALSE	R
2018A-35F290518	2018A-D2	20	20_F	NCC_49M	4	FALSE	R
2018A-35F290518	2018A-D2	20	20_F	NCC_51M	3	FALSE	R
2018A-36F290518	2018A-D2	20	20_F	20_P	3	TRUE	R
2018A-36F290518	2018A-D2	20	20_F	38_P	4	FALSE	R
2018A-36F290518	2018A-D2	20	20_F	NCC_49M	1	FALSE	R
2018A-36F290518	2018A-D2	20	20_F	NCC_51M	2	FALSE	R
2018A-37F290518	2018A-D2	20	20_F	20_P	3	TRUE	R
2018A-37F290518	2018A-D2	20	20_F	38_P	2	FALSE	R
2018A-37F290518	2018A-D2	20	20_F	NCC_49M	4	FALSE	R
2018A-37F290518	2018A-D2	20	20_F	NCC_51M	1	FALSE	R
2018A-38F290518	2018A-D2	20	20_F	20_P	1	TRUE	R
2018A-38F290518	2018A-D2	20	20_F	38_P	4	FALSE	R
2018A-38F290518	2018A-D2	20	20_F	NCC_49M	3	FALSE	R
2018A-38F290518	2018A-D2	20	20_F	NCC_51M	2	FALSE	R
2018A-39F290518	2018A-D2	20	20_F	20_P	2	TRUE	R
2018A-39F290518	2018A-D2	20	20_F	38_P	3	FALSE	R
2018A-39F290518	2018A-D2	20	20_F	NCC_49M	4	FALSE	R
2018A-39F290518	2018A-D2	20	20_F	NCC_51M	1	FALSE	R
2018A-40F290518	2018A-D2	20	20_F	20_P	3	TRUE	R
2018A-40F290518	2018A-D2	20	20_F	38_P	2	FALSE	R
2018A-40F290518	2018A-D2	20	20_F	NCC_49M	4	FALSE	R
2018A-40F290518	2018A-D2	20	20_F	NCC_51M	1	FALSE	R
2018A-41F290518	2018A-D2	20	20_F	20_P	1	TRUE	R
2018A-41F290518	2018A-D2	20	20_F	38_P	3	FALSE	R
2018A-41F290518	2018A-D2	20	20_F	NCC_49M	4	FALSE	R
2018A-41F290518	2018A-D2	20	20_F	NCC_51M	2	FALSE	R
2018A-42F290518	2018A-D2	20	20_F	20_P	1	TRUE	R
2018A-42F290518	2018A-D2	20	20_F	38_P	3	FALSE	R
2018A-42F290518	2018A-D2	20	20_F	NCC_49M	2	FALSE	R
2018A-42F290518	2018A-D2	20	20_F	NCC_51M	4	FALSE	R
2018A-43F290518	2018A-D2	20	20_F	20_P	2	TRUE	R
2018A-43F290518	2018A-D2	20	20_F	38_P	1	FALSE	R
2018A-43F290518	2018A-D2	20	20_F	NCC_49M	4	FALSE	R
2018A-43F290518	2018A-D2	20	20_F	NCC_51M	3	FALSE	R
2018A-44F290518	2018A-D2	20	20_F	20_P	2	TRUE	R
2018A-44F290518	2018A-D2	20	20_F	38_P	1	FALSE	R
2018A-44F290518	2018A-D2	20	20_F	NCC_49M	3	FALSE	R
2018A-44F290518	2018A-D2	20	20_F	NCC_51M	4	FALSE	R
2018A-45F290518	2018A-D2	20	20_F	20_P	1	TRUE	R
2018A-45F290518	2018A-D2	20	20_F	38_P	4	FALSE	R
2018A-45F290518	2018A-D2	20	20_F	NCC_49M	3	FALSE	R
2018A-45F290518	2018A-D2	20	20_F	NCC_51M	2	FALSE	R
2018A-46F290518	2018A-D2	20	20_F	20_P	2	TRUE	R
2018A-46F290518	2018A-D2	20	20_F	38_P	3	FALSE	R
2018A-46F290518	2018A-D2	20	20_F	NCC_49M	1	FALSE	R
2018A-46F290518	2018A-D2	20	20_F	NCC_51M	4	FALSE	R
2018A-47F290518	2018A-D2	20	20_F	20_P	2	TRUE	R
2018A-47F290518	2018A-D2	20	20_F	38_P	1	FALSE	R
2018A-47F290518	2018A-D2	20	20_F	NCC_49M	3	FALSE	R
2018A-47F290518	2018A-D2	20	20_F	NCC_51M	4	FALSE	R
2018A-48F290518	2018A-D2	20	20_F	20_P	3	TRUE	R
2018A-48F290518	2018A-D2	20	20_F	38_P	4	FALSE	R
2018A-48F290518	2018A-D2	20	20_F	NCC_49M	1	FALSE	R
2018A-48F290518	2018A-D2	20	20_F	NCC_51M	2	FALSE	R
2018A-49F290518	2018A-D2	20	20_F	20_P	2	TRUE	R
2018A-49F290518	2018A-D2	20	20_F	38_P	1	FALSE	R
2018A-49F290518	2018A-D2	20	20_F	NCC_49M	3	FALSE	R
2018A-49F290518	2018A-D2	20	20_F	NCC_51M	4	FALSE	R
2018A-50F290518	2018A-D2	20	20_F	20_P	4	TRUE	R
2018A-50F290518	2018A-D2	20	20_F	38_P	3	FALSE	R
2018A-50F290518	2018A-D2	20	20_F	NCC_49M	1	FALSE	R
2018A-50F290518	2018A-D2	20	20_F	NCC_51M	2	FALSE	R
2018A-51F290518	2018A-D2	20	20_F	20_P	1	TRUE	R
2018A-51F290518	2018A-D2	20	20_F	38_P	3	FALSE	R
2018A-51F290518	2018A-D2	20	20_F	NCC_49M	2	FALSE	R
2018A-51F290518	2018A-D2	20	20_F	NCC_51M	4	FALSE	R
2018A-52F290518	2018A-D2	20	20_F	20_P	1	TRUE	R
2018A-52F290518	2018A-D2	20	20_F	38_P	4	FALSE	R
2018A-52F290518	2018A-D2	20	20_F	NCC_49M	2	FALSE	R
2018A-52F290518	2018A-D2	20	20_F	NCC_51M	3	FALSE	R
2019B-D5-R1	2019B-D5	21	21_F	21_P	1	TRUE	R
2019B-D5-R1	2019B-D5	21	21_F	02_P	2	FALSE	R
2019B-D5-R1	2019B-D5	21	21_F	15MDS	3	FALSE	R
2019B-D5-R1	2019B-D5	21	21_F	NCC_11M	4	FALSE	R
2019B-D5-R2	2019B-D5	21	21_F	21_P	1	TRUE	R
2019B-D5-R2	2019B-D5	21	21_F	NCC_13M	2	FALSE	R
2019B-D5-R2	2019B-D5	21	21_F	17MDS	3	FALSE	R
2019B-D5-R2	2019B-D5	21	21_F	7MDSP	4	FALSE	R
2019B-D5-R3	2019B-D5	21	21_F	21_P	1	TRUE	R
2019B-D5-R3	2019B-D5	21	21_F	18MDS	2	FALSE	R
2019B-D5-R3	2019B-D5	21	21_F	NCC_11M	3	FALSE	R
2019B-D5-R3	2019B-D5	21	21_F	7MDSP	4	FALSE	R
2019B-D5-R4	2019B-D5	21	21_F	18MDS	1	FALSE	R
2019B-D5-R4	2019B-D5	21	21_F	21_P	2	TRUE	R
2019B-D5-R4	2019B-D5	21	21_F	17MDS	3	FALSE	R
2019B-D5-R4	2019B-D5	21	21_F	02_P	4	FALSE	R
2019B-D5-R5	2019B-D5	21	21_F	21_P	1	TRUE	R
2019B-D5-R5	2019B-D5	21	21_F	7MDSP	2	FALSE	R
2019B-D5-R5	2019B-D5	21	21_F	NCC_19M	3	FALSE	R
2019B-D5-R5	2019B-D5	21	21_F	19MDS	4	FALSE	R
2019B-D5-R6	2019B-D5	21	21_F	NCC_19M	1	FALSE	R
2019B-D5-R6	2019B-D5	21	21_F	7MDSP	2	FALSE	R
2019B-D5-R6	2019B-D5	21	21_F	19MDS	3	FALSE	R
2019B-D5-R6	2019B-D5	21	21_F	21_P	4	TRUE	R
2019B-D5-R7	2019B-D5	21	21_F	NCC_19M	1	FALSE	R
2019B-D5-R7	2019B-D5	21	21_F	18MDS	2	FALSE	R
2019B-D5-R7	2019B-D5	21	21_F	21_P	3	TRUE	R
2019B-D5-R7	2019B-D5	21	21_F	02_P	4	FALSE	R
2019B-D5-R8	2019B-D5	21	21_F	21_P	1	TRUE	R
2019B-D5-R8	2019B-D5	21	21_F	7MDSP	2	FALSE	R
2019B-D5-R8	2019B-D5	21	21_F	NCC_13M	3	FALSE	R
2019B-D5-R8	2019B-D5	21	21_F	19MDS	4	FALSE	R
2019B-D5-R9	2019B-D5	21	21_F	21_P	1	TRUE	R
2019B-D5-R9	2019B-D5	21	21_F	19MDS	2	FALSE	R
2019B-D5-R9	2019B-D5	21	21_F	17MDS	3	FALSE	R
2019B-D5-R9	2019B-D5	21	21_F	33_P	4	FALSE	R
2019B-D5-R10	2019B-D5	21	21_F	21_P	1	TRUE	R
2019B-D5-R10	2019B-D5	21	21_F	NCC_11M	2	FALSE	R
2019B-D5-R10	2019B-D5	21	21_F	6MDSP	3	FALSE	R
2019B-D5-R10	2019B-D5	21	21_F	NCC_19M	4	FALSE	R
2019B-D5-R11	2019B-D5	21	21_F	21_P	1	TRUE	R
2019B-D5-R11	2019B-D5	21	21_F	NCC_14M	2	FALSE	R
2019B-D5-R11	2019B-D5	21	21_F	NCC_10M	3	FALSE	R
2019B-D5-R11	2019B-D5	21	21_F	6MDSP	4	FALSE	R
2019B-D5-R12	2019B-D5	21	21_F	21_P	1	TRUE	R
2019B-D5-R12	2019B-D5	21	21_F	NCC_10M	2	FALSE	R
2019B-D5-R12	2019B-D5	21	21_F	NCC_14M	3	FALSE	R
2019B-D5-R12	2019B-D5	21	21_F	02_P	4	FALSE	R
2019B-D5-R13	2019B-D5	21	21_F	18MDS	1	FALSE	R
2019B-D5-R13	2019B-D5	21	21_F	21_P	2	TRUE	R
2019B-D5-R13	2019B-D5	21	21_F	6MDSP	3	FALSE	R
2019B-D5-R13	2019B-D5	21	21_F	NCC_11M	4	FALSE	R
2019B-D5-R14	2019B-D5	21	21_F	NCC_19M	1	FALSE	R
2019B-D5-R14	2019B-D5	21	21_F	19MDS	2	FALSE	R
2019B-D5-R14	2019B-D5	21	21_F	21_P	3	TRUE	R
2019B-D5-R14	2019B-D5	21	21_F	33_P	4	FALSE	R
2019B-D5-R15	2019B-D5	21	21_F	21_P	1	TRUE	R
2019B-D5-R15	2019B-D5	21	21_F	18MDS	2	FALSE	R
2019B-D5-R15	2019B-D5	21	21_F	NCC_10M	3	FALSE	R
2019B-D5-R15	2019B-D5	21	21_F	33_P	4	FALSE	R
2019B-D5-R16	2019B-D5	21	21_F	02_P	1	FALSE	R
2019B-D5-R16	2019B-D5	21	21_F	19MDS	2	FALSE	R
2019B-D5-R16	2019B-D5	21	21_F	15MDS	3	FALSE	R
2019B-D5-R16	2019B-D5	21	21_F	21_P	4	TRUE	R
2019B-D5-R17	2019B-D5	21	21_F	02_P	1	FALSE	R
2019B-D5-R17	2019B-D5	21	21_F	17MDS	2	FALSE	R
2019B-D5-R17	2019B-D5	21	21_F	21_P	3	TRUE	R
2019B-D5-R17	2019B-D5	21	21_F	NCC_10M	4	FALSE	R
2019B-D5-R18	2019B-D5	21	21_F	21_P	1	TRUE	R
2019B-D5-R18	2019B-D5	21	21_F	NCC_14M	2	FALSE	R
2019B-D5-R18	2019B-D5	21	21_F	15MDS	3	FALSE	R
2019B-D5-R18	2019B-D5	21	21_F	7MDSP	4	FALSE	R
2019B-D5-R19	2019B-D5	21	21_F	NCC_10M	1	FALSE	R
2019B-D5-R19	2019B-D5	21	21_F	21_P	2	TRUE	R
2019B-D5-R19	2019B-D5	21	21_F	NCC_13M	3	FALSE	R
2019B-D5-R19	2019B-D5	21	21_F	8MDSP	4	FALSE	R
2019B-D5-R20	2019B-D5	21	21_F	19MDS	1	FALSE	R
2019B-D5-R20	2019B-D5	21	21_F	NCC_14M	2	FALSE	R
2019B-D5-R20	2019B-D5	21	21_F	7MDSP	3	FALSE	R
2019B-D5-R20	2019B-D5	21	21_F	21_P	4	TRUE	R
2018A-102F140618	2018A-D5	22	22_F	22_P	2	TRUE	L
2018A-102F140618	2018A-D5	22	22_F	27_P	4	FALSE	L
2018A-102F140618	2018A-D5	22	22_F	NCC_52M	3	FALSE	L
2018A-102F140618	2018A-D5	22	22_F	NCC_57M	1	FALSE	L
2018A-103F140618	2018A-D5	22	22_F	22_P	2	TRUE	L
2018A-103F140618	2018A-D5	22	22_F	27_P	4	FALSE	L
2018A-103F140618	2018A-D5	22	22_F	NCC_52M	3	FALSE	L
2018A-103F140618	2018A-D5	22	22_F	NCC_57M	1	FALSE	L
2018A-104F140618	2018A-D5	22	22_F	22_P	4	TRUE	L
2018A-104F140618	2018A-D5	22	22_F	27_P	1	FALSE	L
2018A-104F140618	2018A-D5	22	22_F	NCC_52M	2	FALSE	L
2018A-104F140618	2018A-D5	22	22_F	NCC_57M	3	FALSE	L
2018A-105F140618	2018A-D5	22	22_F	22_P	2	TRUE	L
2018A-105F140618	2018A-D5	22	22_F	27_P	3	FALSE	L
2018A-105F140618	2018A-D5	22	22_F	NCC_52M	1	FALSE	L
2018A-105F140618	2018A-D5	22	22_F	NCC_57M	4	FALSE	L
2018A-106F140618	2018A-D5	22	22_F	22_P	4	TRUE	L
2018A-106F140618	2018A-D5	22	22_F	27_P	1	FALSE	L
2018A-106F140618	2018A-D5	22	22_F	NCC_52M	2	FALSE	L
2018A-106F140618	2018A-D5	22	22_F	NCC_57M	3	FALSE	L
2018A-107F140618	2018A-D5	22	22_F	22_P	3	TRUE	L
2018A-107F140618	2018A-D5	22	22_F	27_P	2	FALSE	L
2018A-107F140618	2018A-D5	22	22_F	NCC_52M	4	FALSE	L
2018A-107F140618	2018A-D5	22	22_F	NCC_57M	1	FALSE	L
2018A-108F140618	2018A-D5	22	22_F	22_P	3	TRUE	L
2018A-108F140618	2018A-D5	22	22_F	27_P	2	FALSE	L
2018A-108F140618	2018A-D5	22	22_F	NCC_52M	1	FALSE	L
2018A-108F140618	2018A-D5	22	22_F	NCC_57M	4	FALSE	L
2018A-109F140618	2018A-D5	22	22_F	22_P	3	TRUE	L
2018A-109F140618	2018A-D5	22	22_F	27_P	2	FALSE	L
2018A-109F140618	2018A-D5	22	22_F	NCC_52M	1	FALSE	L
2018A-109F140618	2018A-D5	22	22_F	NCC_57M	4	FALSE	L
2018A-110F140618	2018A-D5	22	22_F	22_P	3	TRUE	L
2018A-110F140618	2018A-D5	22	22_F	27_P	2	FALSE	L
2018A-110F140618	2018A-D5	22	22_F	NCC_52M	1	FALSE	L
2018A-110F140618	2018A-D5	22	22_F	NCC_57M	4	FALSE	L
2018A-111F140618	2018A-D5	22	22_F	22_P	4	TRUE	L
2018A-111F140618	2018A-D5	22	22_F	27_P	3	FALSE	L
2018A-111F140618	2018A-D5	22	22_F	NCC_52M	1	FALSE	L
2018A-111F140618	2018A-D5	22	22_F	NCC_57M	2	FALSE	L
2018A-112F140618	2018A-D5	22	22_F	22_P	4	TRUE	L
2018A-112F140618	2018A-D5	22	22_F	27_P	2	FALSE	L
2018A-112F140618	2018A-D5	22	22_F	NCC_52M	1	FALSE	L
2018A-112F140618	2018A-D5	22	22_F	NCC_57M	3	FALSE	L
2018A-113F140618	2018A-D5	22	22_F	22_P	3	TRUE	L
2018A-113F140618	2018A-D5	22	22_F	27_P	4	FALSE	L
2018A-113F140618	2018A-D5	22	22_F	NCC_52M	1	FALSE	L
2018A-113F140618	2018A-D5	22	22_F	NCC_57M	2	FALSE	L
2018A-114F140618	2018A-D5	22	22_F	22_P	2	TRUE	L
2018A-114F140618	2018A-D5	22	22_F	27_P	3	FALSE	L
2018A-114F140618	2018A-D5	22	22_F	NCC_52M	4	FALSE	L
2018A-114F140618	2018A-D5	22	22_F	NCC_57M	1	FALSE	L
2018A-115F140618	2018A-D5	22	22_F	22_P	1	TRUE	L
2018A-115F140618	2018A-D5	22	22_F	27_P	2	FALSE	L
2018A-115F140618	2018A-D5	22	22_F	NCC_52M	4	FALSE	L
2018A-115F140618	2018A-D5	22	22_F	NCC_57M	3	FALSE	L
2018A-116F140618	2018A-D5	22	22_F	22_P	3	TRUE	L
2018A-116F140618	2018A-D5	22	22_F	27_P	1	FALSE	L
2018A-116F140618	2018A-D5	22	22_F	NCC_52M	2	FALSE	L
2018A-116F140618	2018A-D5	22	22_F	NCC_57M	4	FALSE	L
2018A-117F140618	2018A-D5	22	22_F	22_P	1	TRUE	L
2018A-117F140618	2018A-D5	22	22_F	27_P	3	FALSE	L
2018A-117F140618	2018A-D5	22	22_F	NCC_52M	4	FALSE	L
2018A-117F140618	2018A-D5	22	22_F	NCC_57M	2	FALSE	L
2018A-118F140618	2018A-D5	22	22_F	22_P	1	TRUE	L
2018A-118F140618	2018A-D5	22	22_F	27_P	2	FALSE	L
2018A-118F140618	2018A-D5	22	22_F	NCC_52M	4	FALSE	L
2018A-118F140618	2018A-D5	22	22_F	NCC_57M	3	FALSE	L
2018A-119F140618	2018A-D5	22	22_F	22_P	3	TRUE	L
2018A-119F140618	2018A-D5	22	22_F	27_P	4	FALSE	L
2018A-119F140618	2018A-D5	22	22_F	NCC_52M	2	FALSE	L
2018A-119F140618	2018A-D5	22	22_F	NCC_57M	1	FALSE	L
2018A-120F140618	2018A-D5	22	22_F	22_P	2	TRUE	L
2018A-120F140618	2018A-D5	22	22_F	27_P	4	FALSE	L
2018A-120F140618	2018A-D5	22	22_F	NCC_52M	1	FALSE	L
2018A-120F140618	2018A-D5	22	22_F	NCC_57M	3	FALSE	L
2018A-121F140618	2018A-D5	22	22_F	22_P	4	TRUE	L
2018A-121F140618	2018A-D5	22	22_F	27_P	2	FALSE	L
[truncated: 4,260 more rows]

## Sheet: Father_atr_mas_rating
rater_code	session_code	father_ID	attractiveness_father	masculinity_father	armpit
2019B-D2-R1	2019B-D2	01_F	4	5	L
2019B-D2-R3	2019B-D2	01_F	6	4	L
2019B-D2-R4	2019B-D2	01_F	5	4	L
2019B-D2-R5	2019B-D2	01_F	3	3	L
2019B-D2-R6	2019B-D2	01_F	5	5	L
2019B-D2-R7	2019B-D2	01_F	6	2	L
2019B-D2-R8	2019B-D2	01_F	4	5	L
2019B-D2-R9	2019B-D2	01_F	1	6	L
2019B-D2-R10	2019B-D2	01_F	3	3	L
2019B-D2-R12	2019B-D2	01_F	5	5	L
2019B-D2-R14	2019B-D2	01_F	7	2	L
2019B-D2-R15	2019B-D2	01_F	6	5	L
2019B-D2-R17	2019B-D2	01_F	6	4	L
2019B-D2-R18	2019B-D2	01_F	5	5	L
2019B-D2-R19	2019B-D2	01_F	4	5	L
2019B-D2-R20	2019B-D2	01_F	6	6	L
2019B-D2-R23	2019B-D2	01_F	4	2	L
2019B-D2-R24	2019B-D2	01_F	7	5	L
2019B-D4-R1	2019B-D4	02_F	1	4	L
2019B-D4-R2	2019B-D4	02_F	4	2	L
2019B-D4-R3	2019B-D4	02_F	6	7	L
2019B-D4-R4	2019B-D4	02_F	2	5	L
2019B-D4-R5	2019B-D4	02_F	2	3	L
2019B-D4-R6	2019B-D4	02_F	2	4	L
2019B-D4-R7	2019B-D4	02_F	3	4	L
2019B-D4-R8	2019B-D4	02_F	2	6	L
2019B-D4-R9	2019B-D4	02_F	1	1	L
2019B-D4-R10	2019B-D4	02_F	1	3	L
2019B-D4-R11	2019B-D4	02_F	5	2	L
2019B-D4-R12	2019B-D4	02_F	1	3	L
2019B-D4-R13	2019B-D4	02_F	2	6	L
2019B-D4-R14	2019B-D4	02_F	1	2	L
2019B-D4-R15	2019B-D4	02_F	2	3	L
2019B-D4-R16	2019B-D4	02_F	1	4	L
2019B-D4-R17	2019B-D4	02_F	1	2	L
2019B-D4-R18	2019B-D4	02_F	2	3	L
2019B-D4-R19	2019B-D4	02_F	2	6	L
2019B-D4-R20	2019B-D4	02_F	1	3	L
2020A-D5-2020-01-30-R8	2020A-D5	03_F	5	4	R
2020A-D5-2020-01-30-R13	2020A-D5	03_F	5	3	R
2020A-D5-2020-01-30-R2	2020A-D5	03_F	2	5	R
2020A-D5-2020-01-30-R6	2020A-D5	03_F	4	4	R
2020A-D5-2020-01-30-R9	2020A-D5	03_F	2	4	R
2020A-D5-2020-01-30-R15	2020A-D5	03_F	3	6	R
2020A-D5-2020-01-30-R1	2020A-D5	03_F	6	3	R
2020A-D5-2020-01-30-R3	2020A-D5	03_F	5	5	R
2020A-D5-2020-01-30-R11	2020A-D5	03_F	5	5	R
2020A-D5-2020-01-30-R20	2020A-D5	03_F	2	2	R
2020A-D5-2020-01-30-R5	2020A-D5	03_F	2	2	R
2020A-D5-2020-01-30-R7	2020A-D5	03_F	6	4	R
2020A-D5-2020-01-30-R10	2020A-D5	03_F	4	3	R
2020A-D5-2020-01-30-R12	2020A-D5	03_F	6	2	R
2020A-D5-2020-01-30-R16	2020A-D5	03_F	5	3	R
2020A-D5-2020-01-30-R18	2020A-D5	03_F	4	4	R
2020A-D5-2020-01-30-R21	2020A-D5	03_F	5	3	R
2019B-D1-R1	2019B-D1	04_F	1	4	R
2019B-D1-R2	2019B-D1	04_F	3	5	R
2019B-D1-R3	2019B-D1	04_F	1	1	R
2019B-D1-R4	2019B-D1	04_F	5	5	R
2019B-D1-R5	2019B-D1	04_F	5	1	R
2019B-D1-R6	2019B-D1	04_F	1	1	R
2019B-D1-R7	2019B-D1	04_F	5	5	R
2019B-D1-R10	2019B-D1	04_F	4	5	R
2019B-D1-R11	2019B-D1	04_F	2	2	R
2019B-D1-R12	2019B-D1	04_F	5	2	R
2019B-D1-R13	2019B-D1	04_F	5	2	R
2019B-D1-R14	2019B-D1	04_F	4	5	R
2019B-D1-R15	2019B-D1	04_F	5	5	R
2019B-D1-R16	2019B-D1	04_F	4	3	R
2019B-D1-R17	2019B-D1	04_F	4	2	R
2019B-D1-R18	2019B-D1	04_F	5	3	R
2019B-D1-R19	2019B-D1	04_F	5	2	R
2019B-D1-R22	2019B-D1	04_F	4	4	R
2019B-D1-R1	2019B-D1	05_F	2	6	R
2019B-D1-R2	2019B-D1	05_F	1	5	R
2019B-D1-R3	2019B-D1	05_F	2	3	R
2019B-D1-R4	2019B-D1	05_F	5	4	R
2019B-D1-R5	2019B-D1	05_F	3	6	R
2019B-D1-R6	2019B-D1	05_F	2	1	R
2019B-D1-R8	2019B-D1	05_F	3	6	R
2019B-D1-R9	2019B-D1	05_F	3	3	R
2019B-D1-R10	2019B-D1	05_F	2	6	R
2019B-D1-R11	2019B-D1	05_F	1	6	R
2019B-D1-R12	2019B-D1	05_F	5	3	R
2019B-D1-R13	2019B-D1	05_F	5	5	R
2019B-D1-R14	2019B-D1	05_F	3	5	R
2019B-D1-R15	2019B-D1	05_F	2	5	R
2019B-D1-R16	2019B-D1	05_F	4	3	R
2019B-D1-R17	2019B-D1	05_F	2	2	R
2019B-D1-R18	2019B-D1	05_F	3	6	R
2019B-D1-R19	2019B-D1	05_F	4	5	R
2019B-D1-R20	2019B-D1	05_F	2	3	R
2019B-D1-R21	2019B-D1	05_F	3	5	R
2019B-D1-R22	2019B-D1	05_F	5	4	R
2019B-D3-R1	2019B-D3	07_F	2	7	R
2019B-D3-R2	2019B-D3	07_F	1	5	R
2019B-D3-R3	2019B-D3	07_F	1	4	R
2019B-D3-R4	2019B-D3	07_F	3	6	R
2019B-D3-R5	2019B-D3	07_F	5	7	R
2019B-D3-R6	2019B-D3	07_F	2	7	R
2019B-D3-R7	2019B-D3	07_F	5	5	R
2019B-D3-R8	2019B-D3	07_F	1	6	R
2019B-D3-R9	2019B-D3	07_F	1	6	R
2019B-D3-R10	2019B-D3	07_F	2	7	R
2019B-D3-R11	2019B-D3	07_F	2	6	R
2019B-D3-R12	2019B-D3	07_F	5	5	R
2019B-D3-R13	2019B-D3	07_F	1	5	R
2019B-D3-R14	2019B-D3	07_F	3	5	R
2019B-D3-R15	2019B-D3	07_F	3	6	R
2019B-D3-R16	2019B-D3	07_F	1	7	R
2019B-D3-R17	2019B-D3	07_F	2	5	R
2019B-D3-R18	2019B-D3	07_F	2	5	R
2019B-D3-R19	2019B-D3	07_F	1	7	R
2019B-D3-R20	2019B-D3	07_F	2	5	R
2019B-D3-R21	2019B-D3	07_F	1	6	R
2019B-D3-R22	2019B-D3	07_F	4	3	R
2019B-D3-R23	2019B-D3	07_F	2	6	R
2019B-D3-R24	2019B-D3	07_F	2	7	R
2020A-D3-2020-01-28-R3	2020A-D3	13_F	5	3	R
2020A-D3-2020-01-28-R5	2020A-D3	13_F	2	3	R
2020A-D3-2020-01-28-R8	2020A-D3	13_F	5	6	R
2020A-D3-2020-01-28-R12	2020A-D3	13_F	3	2	R
2020A-D3-2020-01-28-R19	2020A-D3	13_F	4	4	R
2020A-D3-2020-01-28-R9	2020A-D3	13_F	3	2	R
2020A-D3-2020-01-28-R16	2020A-D3	13_F	3	4	R
2020A-D3-2020-01-28-R1	2020A-D3	13_F	1	6	R
2020A-D3-2020-01-28-R10	2020A-D3	13_F	5	4	R
2020A-D3-2020-01-28-R14	2020A-D3	13_F	4	3	R
2020A-D3-2020-01-28-R15	2020A-D3	13_F	7	1	R
2020A-D3-2020-01-28-R20	2020A-D3	13_F	3	6	R
2020A-D3-2020-01-28-R13	2020A-D3	13_F	3	4	R
2020A-D3-2020-01-28-R17	2020A-D3	13_F	2	1	R
2020A-D3-2020-01-28-R4	2020A-D3	13_F	4	4	R
2020A-D3-2020-01-28-R18	2020A-D3	13_F	4	3	R
2020A-D3-2020-01-28-R2	2020A-D3	13_F	3	6	R
2020A-D3-2020-01-28-R6	2020A-D3	13_F	4	2	R
2020A-D3-2020-01-28-R7	2020A-D3	13_F	4	4	R
2020A-D3-2020-01-28-R11	2020A-D3	13_F	6	4	R
2020A-D4-2020-01-29-R3	2020A-D4	14_F	6	6	L
2020A-D4-2020-01-29-R9	2020A-D4	14_F	5	5	L
2020A-D4-2020-01-29-R10	2020A-D4	14_F	6	5	L
2020A-D4-2020-01-29-R14	2020A-D4	14_F	3	2	L
2020A-D4-2020-01-29-R8	2020A-D4	14_F	3	3	L
2020A-D4-2020-01-29-R21	2020A-D4	14_F	6	3	L
2020A-D4-2020-01-29-R23	2020A-D4	14_F	4	2	L
2020A-D4-2020-01-29-R24	2020A-D4	14_F	4	5	L
2020A-D4-2020-01-29-R26	2020A-D4	14_F	5	2	L
2020A-D4-2020-01-29-R19	2020A-D4	14_F	2	4	L
2020A-D4-2020-01-29-R2	2020A-D4	14_F	2	1	L
2020A-D4-2020-01-29-R4	2020A-D4	14_F	5	4	L
2020A-D4-2020-01-29-R7	2020A-D4	14_F	6	1	L
2020A-D4-2020-01-29-R20	2020A-D4	14_F	2	3	L
2020A-D4-2020-01-29-R1	2020A-D4	14_F	5	6	L
2020A-D4-2020-01-29-R5	2020A-D4	14_F	6	3	L
2020A-D4-2020-01-29-R13	2020A-D4	14_F	5	4	L
2020A-D4-2020-01-29-R17	2020A-D4	14_F	5	4	L
2020A-D4-2020-01-29-R18	2020A-D4	14_F	4	6	L
2020A-D4-2020-01-29-R11	2020A-D4	14_F	4	4	L
2020A-D4-2020-01-29-R25	2020A-D4	14_F	5	5	L
2020A-D4-2020-01-29-R8	2020A-D4	15_F	4	4	L
2020A-D4-2020-01-29-R17	2020A-D4	15_F	3	2	L
2020A-D4-2020-01-29-R21	2020A-D4	15_F	5	5	L
2020A-D4-2020-01-29-R23	2020A-D4	15_F	3	5	L
2020A-D4-2020-01-29-R25	2020A-D4	15_F	6	5	L
2020A-D4-2020-01-29-R5	2020A-D4	15_F	5	2	L
2020A-D4-2020-01-29-R6	2020A-D4	15_F	5	4	L
2020A-D4-2020-01-29-R13	2020A-D4	15_F	5	4	L
2020A-D4-2020-01-29-R20	2020A-D4	15_F	4	3	L
2020A-D4-2020-01-29-R3	2020A-D4	15_F	5	6	L
2020A-D4-2020-01-29-R4	2020A-D4	15_F	3	3	L
2020A-D4-2020-01-29-R9	2020A-D4	15_F	3	3	L
2020A-D4-2020-01-29-R11	2020A-D4	15_F	6	5	L
2020A-D4-2020-01-29-R26	2020A-D4	15_F	3	6	L
2020A-D4-2020-01-29-R10	2020A-D4	15_F	1	6	L
2020A-D4-2020-01-29-R2	2020A-D4	15_F	2	5	L
2020A-D4-2020-01-29-R14	2020A-D4	15_F	3	4	L
2020A-D4-2020-01-29-R15	2020A-D4	15_F	4	7	L
2020A-D4-2020-01-29-R22	2020A-D4	15_F	3	2	L
2020A-D4-2020-01-29-R24	2020A-D4	15_F	4	5	L
2020A-D4-2020-01-29-R7	2020A-D4	15_F	5	2	L
2020A-D4-2020-01-29-R12	2020A-D4	15_F	3	3	L
2020A-D4-2020-01-29-R16	2020A-D4	15_F	4	4	L
2020A-D4-2020-01-29-R18	2020A-D4	15_F	1	4	L
2020A-D4-2020-01-29-R19	2020A-D4	15_F	3	5	L
2020A-D3-2020-01-28-R6	2020A-D3	16_F	6	4	R
2020A-D3-2020-01-28-R9	2020A-D3	16_F	5	6	R
2020A-D3-2020-01-28-R14	2020A-D3	16_F	5	3	R
2020A-D3-2020-01-28-R4	2020A-D3	16_F	5	5	R
2020A-D3-2020-01-28-R10	2020A-D3	16_F	1	5	R
2020A-D3-2020-01-28-R11	2020A-D3	16_F	6	2	R
2020A-D3-2020-01-28-R13	2020A-D3	16_F	5	4	R
2020A-D3-2020-01-28-R15	2020A-D3	16_F	6	4	R
2020A-D3-2020-01-28-R18	2020A-D3	16_F	6	6	R
2020A-D3-2020-01-28-R5	2020A-D3	16_F	7	4	R
2020A-D3-2020-01-28-R7	2020A-D3	16_F	5	6	R
2020A-D3-2020-01-28-R12	2020A-D3	16_F	3	1	R
2020A-D3-2020-01-28-R17	2020A-D3	16_F	3	3	R
2020A-D3-2020-01-28-R2	2020A-D3	16_F	6	5	R
2020A-D3-2020-01-28-R16	2020A-D3	16_F	4	3	R
2020A-D3-2020-01-28-R19	2020A-D3	16_F	4	2	R
2020A-D3-2020-01-28-R1	2020A-D3	16_F	7	5	R
2020A-D3-2020-01-28-R8	2020A-D3	16_F	2	5	R
2020A-D3-2020-01-28-R3	2020A-D3	16_F	5	5	R
2020A-D3-2020-01-28-R1	2020A-D3	17_F	6	2	R
2020A-D3-2020-01-28-R7	2020A-D3	17_F	7	6	R
2020A-D3-2020-01-28-R15	2020A-D3	17_F	7	2	R
2020A-D3-2020-01-28-R16	2020A-D3	17_F	3	3	R
2020A-D3-2020-01-28-R3	2020A-D3	17_F	6	4	R
2020A-D3-2020-01-28-R4	2020A-D3	17_F	5	3	R
2020A-D3-2020-01-28-R6	2020A-D3	17_F	3	2	R
2020A-D3-2020-01-28-R12	2020A-D3	17_F	1	3	R
2020A-D3-2020-01-28-R20	2020A-D3	17_F	4	5	R
2020A-D3-2020-01-28-R2	2020A-D3	17_F	5	5	R
2020A-D3-2020-01-28-R13	2020A-D3	17_F	5	4	R
2020A-D3-2020-01-28-R5	2020A-D3	17_F	5	4	R
2020A-D3-2020-01-28-R8	2020A-D3	17_F	1	1	R
2020A-D3-2020-01-28-R14	2020A-D3	17_F	4	5	R
2019B-D5-R1	2019B-D5	18_F	4	3	R
2019B-D5-R2	2019B-D5	18_F	4	5	R
2019B-D5-R3	2019B-D5	18_F	3	4	R
2019B-D5-R4	2019B-D5	18_F	5	4	R
2019B-D5-R5	2019B-D5	18_F	3	5	R
2019B-D5-R6	2019B-D5	18_F	5	3	R
2019B-D5-R7	2019B-D5	18_F	4	3	R
2019B-D5-R8	2019B-D5	18_F	6	5	R
2019B-D5-R9	2019B-D5	18_F	5	3	R
2019B-D5-R10	2019B-D5	18_F	5	3	R
2019B-D5-R11	2019B-D5	18_F	6	6	R
2019B-D5-R12	2019B-D5	18_F	4	6	R
2019B-D5-R13	2019B-D5	18_F	5	2	R
2019B-D5-R14	2019B-D5	18_F	2	3	R
2019B-D5-R15	2019B-D5	18_F	4	2	R
2019B-D5-R16	2019B-D5	18_F	6	4	R
2019B-D5-R18	2019B-D5	18_F	7	7	R
2019B-D5-R19	2019B-D5	18_F	6	2	R
2019B-D5-R20	2019B-D5	18_F	2	5	R
2019B-D4-R1	2019B-D4	19_F	5	6	L
2019B-D4-R2	2019B-D4	19_F	5	2	L
2019B-D4-R3	2019B-D4	19_F	7	5	L
2019B-D4-R4	2019B-D4	19_F	5	3	L
2019B-D4-R5	2019B-D4	19_F	3	4	L
2019B-D4-R6	2019B-D4	19_F	2	1	L
2019B-D4-R7	2019B-D4	19_F	3	5	L
2019B-D4-R8	2019B-D4	19_F	NA	3	L
2019B-D4-R9	2019B-D4	19_F	1	2	L
2019B-D4-R10	2019B-D4	19_F	4	2	L
2019B-D4-R11	2019B-D4	19_F	7	2	L
2019B-D4-R12	2019B-D4	19_F	3	2	L
2019B-D4-R13	2019B-D4	19_F	3	5	L
2019B-D4-R14	2019B-D4	19_F	4	2	L
2019B-D4-R15	2019B-D4	19_F	6	4	L
2019B-D4-R16	2019B-D4	19_F	6	4	L
2019B-D4-R17	2019B-D4	19_F	5	4	L
2019B-D4-R18	2019B-D4	19_F	5	2	L
2019B-D4-R20	2019B-D4	19_F	3	4	L
2019B-D5-R1	2019B-D5	21_F	5	1	R
2019B-D5-R2	2019B-D5	21_F	3	5	R
2019B-D5-R3	2019B-D5	21_F	5	2	R
2019B-D5-R4	2019B-D5	21_F	7	7	R
2019B-D5-R5	2019B-D5	21_F	6	6	R
2019B-D5-R6	2019B-D5	21_F	5	4	R
2019B-D5-R7	2019B-D5	21_F	4	2	R
2019B-D5-R8	2019B-D5	21_F	5	3	R
2019B-D5-R9	2019B-D5	21_F	6	5	R
2019B-D5-R10	2019B-D5	21_F	5	4	R
2019B-D5-R11	2019B-D5	21_F	4	4	R
2019B-D5-R12	2019B-D5	21_F	2	2	R
2019B-D5-R13	2019B-D5	21_F	6	3	R
2019B-D5-R14	2019B-D5	21_F	1	5	R
2019B-D5-R15	2019B-D5	21_F	7	4	R
2019B-D5-R17	2019B-D5	21_F	5	2	R
2019B-D5-R19	2019B-D5	21_F	6	2	R
2019B-D5-R20	2019B-D5	21_F	1	6	R
2020A-D4-2020-01-29-R4	2020A-D4	25_F	5	5	L
2020A-D4-2020-01-29-R16	2020A-D4	25_F	4	4	L
2020A-D4-2020-01-29-R19	2020A-D4	25_F	5	2	L
2020A-D4-2020-01-29-R24	2020A-D4	25_F	4	3	L
2020A-D4-2020-01-29-R1	2020A-D4	25_F	4	5	L
2020A-D4-2020-01-29-R11	2020A-D4	25_F	5	4	L
2020A-D4-2020-01-29-R12	2020A-D4	25_F	2	5	L
2020A-D4-2020-01-29-R18	2020A-D4	25_F	1	6	L
2020A-D4-2020-01-29-R25	2020A-D4	25_F	5	6	L
2020A-D4-2020-01-29-R2	2020A-D4	25_F	4	6	L
2020A-D4-2020-01-29-R5	2020A-D4	25_F	3	3	L
2020A-D4-2020-01-29-R6	2020A-D4	25_F	6	2	L
2020A-D4-2020-01-29-R7	2020A-D4	25_F	2	4	L
2020A-D4-2020-01-29-R8	2020A-D4	25_F	4	5	L
2020A-D4-2020-01-29-R10	2020A-D4	25_F	1	7	L
2020A-D4-2020-01-29-R14	2020A-D4	25_F	5	5	L
2020A-D4-2020-01-29-R17	2020A-D4	25_F	6	5	L
2020A-D4-2020-01-29-R21	2020A-D4	25_F	6	6	L
2020A-D4-2020-01-29-R13	2020A-D4	25_F	2	6	L
2020A-D4-2020-01-29-R15	2020A-D4	25_F	7	3	L
2020A-D4-2020-01-29-R23	2020A-D4	25_F	1	7	L
2020A-D4-2020-01-29-R26	2020A-D4	25_F	5	2	L
2020A-D4-2020-01-29-R3	2020A-D4	25_F	3	3	L
2020A-D4-2020-01-29-R20	2020A-D4	25_F	3	3	L
2020A-D4-2020-01-29-R9	2020A-D4	25_F	1	3	L
2020A-D4-2020-01-29-R22	2020A-D4	25_F	1	2	L
2019B-D1-R1	2019B-D1	28_F	5	5	R
2019B-D1-R2	2019B-D1	28_F	2	5	R
2019B-D1-R3	2019B-D1	28_F	2	4	R
2019B-D1-R4	2019B-D1	28_F	3	5	R
2019B-D1-R5	2019B-D1	28_F	3	2	R
2019B-D1-R6	2019B-D1	28_F	2	1	R
2019B-D1-R8	2019B-D1	28_F	4	3	R
2019B-D1-R9	2019B-D1	28_F	6	3	R
2019B-D1-R11	2019B-D1	28_F	6	3	R
2019B-D1-R13	2019B-D1	28_F	4	5	R
2019B-D1-R14	2019B-D1	28_F	3	5	R
2019B-D1-R15	2019B-D1	28_F	5	2	R
2019B-D1-R16	2019B-D1	28_F	3	4	R
2019B-D1-R17	2019B-D1	28_F	3	2	R
2019B-D1-R18	2019B-D1	28_F	3	4	R
2019B-D1-R19	2019B-D1	28_F	3	6	R
2019B-D1-R20	2019B-D1	28_F	5	5	R
2019B-D5-R1	2019B-D5	29_F	3	4	R
2019B-D5-R2	2019B-D5	29_F	1	3	R
2019B-D5-R3	2019B-D5	29_F	5	3	R
2019B-D5-R4	2019B-D5	29_F	5	6	R
2019B-D5-R5	2019B-D5	29_F	2	3	R
2019B-D5-R6	2019B-D5	29_F	5	4	R
2019B-D5-R7	2019B-D5	29_F	6	5	R
2019B-D5-R8	2019B-D5	29_F	6	5	R
2019B-D5-R9	2019B-D5	29_F	2	7	R
2019B-D5-R11	2019B-D5	29_F	5	5	R
2019B-D5-R12	2019B-D5	29_F	4	5	R
2019B-D5-R13	2019B-D5	29_F	5	4	R
2019B-D5-R15	2019B-D5	29_F	5	5	R
2019B-D5-R17	2019B-D5	29_F	5	2	R
2019B-D5-R18	2019B-D5	29_F	5	4	R
2019B-D5-R19	2019B-D5	29_F	2	3	R
2019B-D5-R20	2019B-D5	29_F	4	2	R
2020A-D4-2020-01-29-R7	2020A-D4	30_F	6	3	L
2020A-D4-2020-01-29-R11	2020A-D4	30_F	5	4	L
2020A-D4-2020-01-29-R12	2020A-D4	30_F	6	4	L
2020A-D4-2020-01-29-R9	2020A-D4	30_F	4	4	L
2020A-D4-2020-01-29-R14	2020A-D4	30_F	5	3	L
2020A-D4-2020-01-29-R24	2020A-D4	30_F	6	5	L
2020A-D4-2020-01-29-R8	2020A-D4	30_F	6	6	L
2020A-D4-2020-01-29-R18	2020A-D4	30_F	5	6	L
2020A-D4-2020-01-29-R25	2020A-D4	30_F	5	5	L
2020A-D4-2020-01-29-R4	2020A-D4	30_F	5	4	L
2020A-D4-2020-01-29-R6	2020A-D4	30_F	5	2	L
2020A-D4-2020-01-29-R21	2020A-D4	30_F	4	5	L
2020A-D4-2020-01-29-R23	2020A-D4	30_F	2	3	L
2020A-D4-2020-01-29-R2	2020A-D4	30_F	1	3	L
2020A-D4-2020-01-29-R3	2020A-D4	30_F	5	5	L
2020A-D4-2020-01-29-R10	2020A-D4	30_F	5	4	L
2020A-D4-2020-01-29-R13	2020A-D4	30_F	4	5	L
2020A-D4-2020-01-29-R15	2020A-D4	30_F	6	7	L
2020A-D4-2020-01-29-R20	2020A-D4	30_F	4	1	L
2019B-D1-R1	2019B-D1	31_F	4	4	R
2019B-D1-R2	2019B-D1	31_F	2	3	R
2019B-D1-R3	2019B-D1	31_F	3	4	R
2019B-D1-R4	2019B-D1	31_F	6	5	R
2019B-D1-R6	2019B-D1	31_F	1	2	R
2019B-D1-R7	2019B-D1	31_F	5	4	R
2019B-D1-R8	2019B-D1	31_F	5	4	R
2019B-D1-R9	2019B-D1	31_F	5	2	R
2019B-D1-R10	2019B-D1	31_F	5	3	R
2019B-D1-R14	2019B-D1	31_F	2	4	R
2019B-D1-R15	2019B-D1	31_F	5	5	R
2019B-D1-R16	2019B-D1	31_F	6	5	R
2019B-D1-R17	2019B-D1	31_F	6	3	R
2019B-D1-R18	2019B-D1	31_F	5	4	R
2019B-D1-R19	2019B-D1	31_F	4	4	R
2019B-D1-R20	2019B-D1	31_F	4	3	R
2019B-D1-R21	2019B-D1	31_F	4	1	R
2019B-D1-R22	2019B-D1	31_F	4	4	R
2019B-D5-R1	2019B-D5	32_F	3	3	R
2019B-D5-R2	2019B-D5	32_F	5	4	R
2019B-D5-R3	2019B-D5	32_F	4	2	R
2019B-D5-R4	2019B-D5	32_F	5	3	R
2019B-D5-R6	2019B-D5	32_F	3	4	R
2019B-D5-R7	2019B-D5	32_F	2	5	R
2019B-D5-R9	2019B-D5	32_F	4	3	R
2019B-D5-R10	2019B-D5	32_F	1	3	R
2019B-D5-R11	2019B-D5	32_F	5	5	R
2019B-D5-R12	2019B-D5	32_F	4	4	R
2019B-D5-R13	2019B-D5	32_F	4	5	R
2019B-D5-R14	2019B-D5	32_F	5	5	R
2019B-D5-R15	2019B-D5	32_F	5	1	R
2019B-D5-R16	2019B-D5	32_F	4	4	R
2019B-D5-R17	2019B-D5	32_F	6	2	R
2019B-D5-R19	2019B-D5	32_F	2	5	R
2019B-D5-R20	2019B-D5	32_F	2	6	R
2019B-D4-R1	2019B-D4	33_F	1	6	L
2019B-D4-R2	2019B-D4	33_F	7	5	L
2019B-D4-R3	2019B-D4	33_F	5	7	L
2019B-D4-R4	2019B-D4	33_F	1	7	L
2019B-D4-R5	2019B-D4	33_F	1	6	L
2019B-D4-R6	2019B-D4	33_F	1	7	L
2019B-D4-R7	2019B-D4	33_F	1	6	L
2019B-D4-R8	2019B-D4	33_F	2	7	L
2019B-D4-R9	2019B-D4	33_F	1	1	L
2019B-D4-R10	2019B-D4	33_F	1	6	L
2019B-D4-R11	2019B-D4	33_F	1	7	L
2019B-D4-R12	2019B-D4	33_F	1	6	L
2019B-D4-R13	2019B-D4	33_F	1	7	L
2019B-D4-R14	2019B-D4	33_F	1	3	L
2019B-D4-R15	2019B-D4	33_F	1	5	L
2019B-D4-R16	2019B-D4	33_F	1	5	L
2019B-D4-R17	2019B-D4	33_F	1	3	L
2019B-D4-R18	2019B-D4	33_F	1	6	L
2019B-D4-R19	2019B-D4	33_F	2	1	L
2019B-D4-R20	2019B-D4	33_F	1	6	L
2019B-D2-R1	2019B-D2	34_F	4	2	L
2019B-D2-R2	2019B-D2	34_F	3	4	L
2019B-D2-R3	2019B-D2	34_F	3	3	L
2019B-D2-R4	2019B-D2	34_F	3	5	L
2019B-D2-R5	2019B-D2	34_F	5	2	L
2019B-D2-R6	2019B-D2	34_F	3	3	L
2019B-D2-R7	2019B-D2	34_F	6	2	L
2019B-D2-R9	2019B-D2	34_F	5	3	L
2019B-D2-R10	2019B-D2	34_F	2	3	L
2019B-D2-R11	2019B-D2	34_F	5	4	L
2019B-D2-R12	2019B-D2	34_F	5	3	L
2019B-D2-R13	2019B-D2	34_F	1	1	L
2019B-D2-R14	2019B-D2	34_F	7	3	L
2019B-D2-R15	2019B-D2	34_F	6	5	L
2019B-D2-R16	2019B-D2	34_F	4	2	L
2019B-D2-R17	2019B-D2	34_F	6	6	L
2019B-D2-R18	2019B-D2	34_F	6	5	L
2019B-D2-R19	2019B-D2	34_F	6	4	L
2019B-D2-R20	2019B-D2	34_F	6	6	L
2019B-D2-R21	2019B-D2	34_F	4	1	L
2019B-D2-R24	2019B-D2	34_F	4	3	L
2020A-D5-2020-01-30-R1	2020A-D5	36_F	1	4	R
2020A-D5-2020-01-30-R3	2020A-D5	36_F	2	5	R
2020A-D5-2020-01-30-R6	2020A-D5	36_F	5	5	R
2020A-D5-2020-01-30-R18	2020A-D5	36_F	4	6	R
2020A-D5-2020-01-30-R7	2020A-D5	36_F	2	6	R
2020A-D5-2020-01-30-R9	2020A-D5	36_F	2	6	R
2020A-D5-2020-01-30-R10	2020A-D5	36_F	3	6	R
2020A-D5-2020-01-30-R11	2020A-D5	36_F	5	5	R
2020A-D5-2020-01-30-R12	2020A-D5	36_F	1	6	R
2020A-D5-2020-01-30-R15	2020A-D5	36_F	1	6	R
2020A-D5-2020-01-30-R19	2020A-D5	36_F	5	4	R
2020A-D5-2020-01-30-R21	2020A-D5	36_F	1	6	R
2020A-D5-2020-01-30-R22	2020A-D5	36_F	4	6	R
2020A-D5-2020-01-30-R4	2020A-D5	36_F	1	7	R
2020A-D5-2020-01-30-R14	2020A-D5	36_F	1	1	R
2020A-D5-2020-01-30-R16	2020A-D5	36_F	4	6	R
2020A-D5-2020-01-30-R2	2020A-D5	36_F	6	4	R
2020A-D5-2020-01-30-R17	2020A-D5	36_F	1	7	R
2020A-D5-2020-01-30-R8	2020A-D5	36_F	5	6	R
2020A-D5-2020-01-30-R13	2020A-D5	36_F	1	7	R
2019B-D2-R1	2019B-D2	37_F	5	5	L
2019B-D2-R3	2019B-D2	37_F	4	4	L
2019B-D2-R4	2019B-D2	37_F	6	4	L
2019B-D2-R5	2019B-D2	37_F	6	5	L
2019B-D2-R6	2019B-D2	37_F	2	2	L
2019B-D2-R7	2019B-D2	37_F	7	1	L
2019B-D2-R8	2019B-D2	37_F	2	2	L
2019B-D2-R9	2019B-D2	37_F	7	2	L
2019B-D2-R10	2019B-D2	37_F	1	5	L
2019B-D2-R12	2019B-D2	37_F	3	4	L
2019B-D2-R13	2019B-D2	37_F	1	1	L
2019B-D2-R14	2019B-D2	37_F	6	2	L
2019B-D2-R15	2019B-D2	37_F	3	3	L
2019B-D2-R16	2019B-D2	37_F	3	3	L
2019B-D2-R17	2019B-D2	37_F	5	5	L
2019B-D2-R18	2019B-D2	37_F	7	6	L
2019B-D2-R19	2019B-D2	37_F	5	5	L
2019B-D2-R20	2019B-D2	37_F	3	3	L
2019B-D2-R22	2019B-D2	37_F	2	5	L
2019B-D2-R23	2019B-D2	37_F	2	4	L
2019B-D2-R24	2019B-D2	37_F	4	6	L
2019B-D3-R1	2019B-D3	39_F	5	4	R
2019B-D3-R2	2019B-D3	39_F	5	2	R
2019B-D3-R3	2019B-D3	39_F	3	3	R
2019B-D3-R4	2019B-D3	39_F	4	4	R
2019B-D3-R5	2019B-D3	39_F	NA	3	R
2019B-D3-R6	2019B-D3	39_F	5	6	R
2019B-D3-R7	2019B-D3	39_F	3	4	R
2019B-D3-R8	2019B-D3	39_F	6	4	R
2019B-D3-R9	2019B-D3	39_F	5	2	R
2019B-D3-R10	2019B-D3	39_F	5	3	R
2019B-D3-R11	2019B-D3	39_F	5	4	R
2019B-D3-R12	2019B-D3	39_F	4	4	R
2019B-D3-R13	2019B-D3	39_F	5	4	R
2019B-D3-R14	2019B-D3	39_F	5	4	R
2019B-D3-R15	2019B-D3	39_F	3	1	R
2019B-D3-R16	2019B-D3	39_F	4	1	R
2019B-D3-R17	2019B-D3	39_F	2	2	R
2019B-D3-R18	2019B-D3	39_F	5	4	R
2019B-D3-R19	2019B-D3	39_F	5	4	R
2019B-D3-R20	2019B-D3	39_F	4	1	R
2019B-D3-R21	2019B-D3	39_F	3	3	R
2019B-D3-R22	2019B-D3	39_F	2	4	R
2019B-D3-R23	2019B-D3	39_F	4	3	R
2019B-D3-R24	2019B-D3	39_F	6	7	R
2019B-D2-R1	2019B-D2	40_F	3	5	L
2019B-D2-R2	2019B-D2	40_F	3	3	L
2019B-D2-R3	2019B-D2	40_F	4	6	L
2019B-D2-R4	2019B-D2	40_F	3	6	L
2019B-D2-R5	2019B-D2	40_F	5	3	L
2019B-D2-R6	2019B-D2	40_F	2	4	L
2019B-D2-R7	2019B-D2	40_F	6	2	L
2019B-D2-R8	2019B-D2	40_F	2	3	L
2019B-D2-R9	2019B-D2	40_F	4	4	L
2019B-D2-R10	2019B-D2	40_F	1	5	L
2019B-D2-R11	2019B-D2	40_F	5	5	L
2019B-D2-R12	2019B-D2	40_F	2	3	L
2019B-D2-R13	2019B-D2	40_F	2	2	L
2019B-D2-R14	2019B-D2	40_F	3	5	L
2019B-D2-R15	2019B-D2	40_F	6	6	L
2019B-D2-R16	2019B-D2	40_F	5	5	L
2019B-D2-R17	2019B-D2	40_F	4	4	L
2019B-D2-R18	2019B-D2	40_F	2	2	L
2019B-D2-R19	2019B-D2	40_F	5	4	L
2019B-D2-R20	2019B-D2	40_F	2	6	L
2019B-D2-R21	2019B-D2	40_F	3	2	L
2019B-D2-R22	2019B-D2	40_F	2	4	L
2019B-D2-R23	2019B-D2	40_F	4	3	L
2019B-D2-R24	2019B-D2	40_F	3	6	L
2020A-D4-2020-01-29-R2	2020A-D4	43_F	2	3	L
2020A-D4-2020-01-29-R5	2020A-D4	43_F	5	3	L
2020A-D4-2020-01-29-R6	2020A-D4	43_F	4	3	L
2020A-D4-2020-01-29-R26	2020A-D4	43_F	4	5	L
2020A-D4-2020-01-29-R3	2020A-D4	43_F	6	6	L
2020A-D4-2020-01-29-R4	2020A-D4	43_F	5	5	L
2020A-D4-2020-01-29-R10	2020A-D4	43_F	5	3	L
2020A-D4-2020-01-29-R15	2020A-D4	43_F	4	5	L
2020A-D4-2020-01-29-R18	2020A-D4	43_F	6	5	L
2020A-D4-2020-01-29-R20	2020A-D4	43_F	3	6	L
2020A-D4-2020-01-29-R23	2020A-D4	43_F	3	4	L
2020A-D4-2020-01-29-R25	2020A-D4	43_F	4	5	L
2020A-D4-2020-01-29-R21	2020A-D4	43_F	4	3	L
2020A-D4-2020-01-29-R8	2020A-D4	43_F	6	6	L
2020A-D4-2020-01-29-R19	2020A-D4	43_F	2	3	L
2020A-D4-2020-01-29-R14	2020A-D4	43_F	4	4	L
2020A-D4-2020-01-29-R17	2020A-D4	43_F	5	5	L
2020A-D4-2020-01-29-R24	2020A-D4	43_F	5	3	L
2020A-D5-2020-01-30-R2	2020A-D5	44_F	6	3	R
2020A-D5-2020-01-30-R10	2020A-D5	44_F	4	3	R
2020A-D5-2020-01-30-R15	2020A-D5	44_F	4	2	R
2020A-D5-2020-01-30-R19	2020A-D5	44_F	4	4	R
2020A-D5-2020-01-30-R1	2020A-D5	44_F	3	3	R
2020A-D5-2020-01-30-R4	2020A-D5	44_F	2	4	R
2020A-D5-2020-01-30-R17	2020A-D5	44_F	4	3	R
2020A-D5-2020-01-30-R3	2020A-D5	44_F	5	5	R
2020A-D5-2020-01-30-R7	2020A-D5	44_F	3	2	R
2020A-D5-2020-01-30-R12	2020A-D5	44_F	2	2	R
2020A-D5-2020-01-30-R8	2020A-D5	44_F	4	3	R
2020A-D5-2020-01-30-R9	2020A-D5	44_F	2	3	R
2020A-D5-2020-01-30-R13	2020A-D5	44_F	3	4	R
2020A-D5-2020-01-30-R16	2020A-D5	44_F	4	4	R
2020A-D5-2020-01-30-R21	2020A-D5	44_F	4	2	R
2019B-D3-R1	2019B-D3	45_F	1	6	R
2019B-D3-R2	2019B-D3	45_F	3	4	R
2019B-D3-R3	2019B-D3	45_F	2	4	R
2019B-D3-R4	2019B-D3	45_F	4	6	R
2019B-D3-R5	2019B-D3	45_F	2	4	R
2019B-D3-R6	2019B-D3	45_F	4	7	R
2019B-D3-R7	2019B-D3	45_F	5	5	R
2019B-D3-R8	2019B-D3	45_F	2	6	R
2019B-D3-R9	2019B-D3	45_F	4	6	R
2019B-D3-R10	2019B-D3	45_F	6	7	R
2019B-D3-R11	2019B-D3	45_F	4	5	R
2019B-D3-R12	2019B-D3	45_F	4	4	R
2019B-D3-R13	2019B-D3	45_F	3	5	R
2019B-D3-R14	2019B-D3	45_F	5	5	R
2019B-D3-R15	2019B-D3	45_F	6	6	R
2019B-D3-R16	2019B-D3	45_F	5	4	R
2019B-D3-R17	2019B-D3	45_F	1	4	R
2019B-D3-R18	2019B-D3	45_F	1	6	R
2019B-D3-R19	2019B-D3	45_F	2	5	R
2019B-D3-R20	2019B-D3	45_F	1	1	R
2019B-D3-R21	2019B-D3	45_F	3	6	R
2019B-D3-R22	2019B-D3	45_F	5	5	R
2019B-D3-R24	2019B-D3	45_F	6	6	R
2019B-D4-R1	2019B-D4	46_F	5	4	L
2019B-D4-R2	2019B-D4	46_F	4	3	L
2019B-D4-R4	2019B-D4	46_F	7	4	L
2019B-D4-R5	2019B-D4	46_F	5	3	L
2019B-D4-R6	2019B-D4	46_F	1	2	L
2019B-D4-R7	2019B-D4	46_F	2	2	L
2019B-D4-R8	2019B-D4	46_F	6	1	L
2019B-D4-R9	2019B-D4	46_F	3	3	L
2019B-D4-R10	2019B-D4	46_F	3	3	L
2019B-D4-R11	2019B-D4	46_F	5	2	L
2019B-D4-R12	2019B-D4	46_F	1	4	L
2019B-D4-R13	2019B-D4	46_F	2	6	L
2019B-D4-R15	2019B-D4	46_F	2	3	L
2019B-D4-R16	2019B-D4	46_F	4	3	L
2019B-D4-R17	2019B-D4	46_F	4	5	L
2019B-D4-R18	2019B-D4	46_F	4	5	L
2019B-D4-R20	2019B-D4	46_F	2	4	L
2019B-D3-R1	2019B-D3	47_F	3	4	R
2019B-D3-R2	2019B-D3	47_F	2	5	R
2019B-D3-R3	2019B-D3	47_F	3	4	R
2019B-D3-R4	2019B-D3	47_F	5	2	R
2019B-D3-R6	2019B-D3	47_F	4	6	R
2019B-D3-R7	2019B-D3	47_F	5	4	R
2019B-D3-R8	2019B-D3	47_F	5	5	R
2019B-D3-R10	2019B-D3	47_F	2	2	R
2019B-D3-R11	2019B-D3	47_F	4	4	R
2019B-D3-R12	2019B-D3	47_F	5	5	R
2019B-D3-R13	2019B-D3	47_F	4	4	R
2019B-D3-R16	2019B-D3	47_F	4	3	R
2019B-D3-R17	2019B-D3	47_F	4	4	R
2019B-D3-R19	2019B-D3	47_F	5	4	R
2019B-D3-R20	2019B-D3	47_F	4	2	R
2019B-D3-R21	2019B-D3	47_F	3	5	R
2019B-D3-R24	2019B-D3	47_F	5	7	R
2019B-D2-R1	2019B-D2	48_F	5	4	L
2019B-D2-R2	2019B-D2	48_F	2	3	L
2019B-D2-R3	2019B-D2	48_F	4	4	L
2019B-D2-R4	2019B-D2	48_F	1	3	L
2019B-D2-R5	2019B-D2	48_F	1	7	L
2019B-D2-R6	2019B-D2	48_F	4	2	L
2019B-D2-R7	2019B-D2	48_F	7	1	L
2019B-D2-R8	2019B-D2	48_F	4	2	L
2019B-D2-R9	2019B-D2	48_F	3	4	L
2019B-D2-R10	2019B-D2	48_F	3	3	L
2019B-D2-R12	2019B-D2	48_F	5	5	L
2019B-D2-R14	2019B-D2	48_F	3	4	L
2019B-D2-R15	2019B-D2	48_F	6	6	L
2019B-D2-R16	2019B-D2	48_F	5	5	L
2019B-D2-R18	2019B-D2	48_F	5	5	L
2019B-D2-R19	2019B-D2	48_F	6	5	L
2019B-D2-R20	2019B-D2	48_F	6	7	L
2019B-D2-R23	2019B-D2	48_F	5	2	L
2019B-D2-R24	2019B-D2	48_F	5	6	L
2020A-D3-2020-01-28-R2	2020A-D3	50_F	3	6	R
2020A-D3-2020-01-28-R17	2020A-D3	50_F	5	4	R
2020A-D3-2020-01-28-R12	2020A-D3	50_F	3	1	R
2020A-D3-2020-01-28-R20	2020A-D3	50_F	3	5	R
2020A-D3-2020-01-28-R11	2020A-D3	50_F	6	5	R
2020A-D3-2020-01-28-R3	2020A-D3	50_F	6	3	R
2020A-D3-2020-01-28-R6	2020A-D3	50_F	5	3	R
2020A-D3-2020-01-28-R7	2020A-D3	50_F	5	5	R
2020A-D3-2020-01-28-R8	2020A-D3	50_F	3	2	R
2020A-D3-2020-01-28-R14	2020A-D3	50_F	6	6	R
2020A-D3-2020-01-28-R5	2020A-D3	50_F	3	4	R
2020A-D3-2020-01-28-R9	2020A-D3	50_F	6	6	R
2020A-D3-2020-01-28-R15	2020A-D3	50_F	3	5	R
2020A-D3-2020-01-28-R19	2020A-D3	50_F	4	7	R
2020A-D3-2020-01-28-R1	2020A-D3	50_F	1	5	R
2020A-D3-2020-01-28-R4	2020A-D3	50_F	3	4	R
2020A-D3-2020-01-28-R10	2020A-D3	50_F	4	5	R
2020A-D3-2020-01-28-R13	2020A-D3	50_F	6	6	R
2020A-D3-2020-01-28-R18	2020A-D3	50_F	4	6	R
2020A-D5-2020-01-30-R7	2020A-D5	52_F	5	4	R
2020A-D5-2020-01-30-R13	2020A-D5	52_F	5	3	R
2020A-D5-2020-01-30-R21	2020A-D5	52_F	2	5	R
2020A-D5-2020-01-30-R22	2020A-D5	52_F	4	5	R
2020A-D5-2020-01-30-R14	2020A-D5	52_F	7	7	R
2020A-D5-2020-01-30-R16	2020A-D5	52_F	4	4	R
2020A-D5-2020-01-30-R1	2020A-D5	52_F	4	5	R
2020A-D5-2020-01-30-R8	2020A-D5	52_F	6	5	R
2020A-D5-2020-01-30-R17	2020A-D5	52_F	4	5	R
2020A-D5-2020-01-30-R6	2020A-D5	52_F	1	1	R
2020A-D5-2020-01-30-R10	2020A-D5	52_F	3	7	R
2020A-D5-2020-01-30-R12	2020A-D5	52_F	3	5	R
2020A-D5-2020-01-30-R18	2020A-D5	52_F	3	4	R
2020A-D5-2020-01-30-R2	2020A-D5	52_F	3	3	R
2020A-D5-2020-01-30-R3	2020A-D5	52_F	2	6	R
2020A-D5-2020-01-30-R4	2020A-D5	52_F	3	5	R
2020A-D5-2020-01-30-R9	2020A-D5	52_F	2	6	R
2020A-D5-2020-01-30-R11	2020A-D5	52_F	3	4	R
2020A-D5-2020-01-30-R15	2020A-D5	52_F	1	3	R
2020A-D5-2020-01-30-R19	2020A-D5	52_F	3	4	R
2020A-D5-2020-01-30-R20	2020A-D5	52_F	5	2	R
2019B-D5-R1	2019B-D5	55_F	1	6	R
2019B-D5-R2	2019B-D5	55_F	1	1	R
2019B-D5-R3	2019B-D5	55_F	1	5	R
2019B-D5-R4	2019B-D5	55_F	4	6	R
2019B-D5-R5	2019B-D5	55_F	3	6	R
2019B-D5-R6	2019B-D5	55_F	3	7	R
2019B-D5-R7	2019B-D5	55_F	2	6	R
2019B-D5-R8	2019B-D5	55_F	1	7	R
2019B-D5-R9	2019B-D5	55_F	2	7	R
2019B-D5-R10	2019B-D5	55_F	1	6	R
2019B-D5-R11	2019B-D5	55_F	3	6	R
2019B-D5-R12	2019B-D5	55_F	3	5	R
2019B-D5-R13	2019B-D5	55_F	7	7	R
2019B-D5-R14	2019B-D5	55_F	6	3	R
2019B-D5-R15	2019B-D5	55_F	3	6	R
2019B-D5-R16	2019B-D5	55_F	4	4	R
2019B-D5-R17	2019B-D5	55_F	1	6	R
2019B-D5-R18	2019B-D5	55_F	1	4	R
2019B-D5-R19	2019B-D5	55_F	1	7	R
2019B-D5-R20	2019B-D5	55_F	6	7	R
2019B-D3-R1	2019B-D3	56_F	5	3	R
2019B-D3-R2	2019B-D3	56_F	3	4	R
2019B-D3-R3	2019B-D3	56_F	2	4	R
2019B-D3-R4	2019B-D3	56_F	4	6	R
2019B-D3-R5	2019B-D3	56_F	5	4	R
2019B-D3-R6	2019B-D3	56_F	2	7	R
2019B-D3-R7	2019B-D3	56_F	2	4	R
2019B-D3-R8	2019B-D3	56_F	1	6	R
2019B-D3-R9	2019B-D3	56_F	2	4	R
2019B-D3-R10	2019B-D3	56_F	3	2	R
2019B-D3-R11	2019B-D3	56_F	3	5	R
2019B-D3-R12	2019B-D3	56_F	4	5	R
2019B-D3-R13	2019B-D3	56_F	3	4	R
2019B-D3-R14	2019B-D3	56_F	3	4	R
2019B-D3-R15	2019B-D3	56_F	6	4	R
2019B-D3-R16	2019B-D3	56_F	3	5	R
2019B-D3-R17	2019B-D3	56_F	5	4	R
2019B-D3-R18	2019B-D3	56_F	4	4	R
2019B-D3-R19	2019B-D3	56_F	4	3	R
2019B-D3-R20	2019B-D3	56_F	1	1	R
2019B-D3-R21	2019B-D3	56_F	2	5	R
2019B-D3-R22	2019B-D3	56_F	3	3	R
2019B-D3-R23	2019B-D3	56_F	2	4	R
2019B-D3-R24	2019B-D3	56_F	6	7	R
2019B-D4-R1	2019B-D4	58_F	3	2	L
2019B-D4-R2	2019B-D4	58_F	5	4	L
2019B-D4-R3	2019B-D4	58_F	7	5	L
2019B-D4-R4	2019B-D4	58_F	7	2	L
2019B-D4-R5	2019B-D4	58_F	5	3	L
2019B-D4-R6	2019B-D4	58_F	5	2	L
2019B-D4-R7	2019B-D4	58_F	6	7	L
2019B-D4-R8	2019B-D4	58_F	5	3	L
2019B-D4-R9	2019B-D4	58_F	3	3	L
2019B-D4-R10	2019B-D4	58_F	6	5	L
2019B-D4-R11	2019B-D4	58_F	7	1	L
2019B-D4-R12	2019B-D4	58_F	6	6	L
2019B-D4-R13	2019B-D4	58_F	5	1	L
2019B-D4-R14	2019B-D4	58_F	6	3	L
2019B-D4-R15	2019B-D4	58_F	6	6	L
2019B-D4-R16	2019B-D4	58_F	7	3	L
2019B-D4-R17	2019B-D4	58_F	5	5	L
2019B-D4-R18	2019B-D4	58_F	6	2	L
2019B-D4-R19	2019B-D4	58_F	1	2	L
2019B-D4-R20	2019B-D4	58_F	5	2	L
2020A-D4-2020-01-29-R1	2020A-D4	60_F	1	5	L
2020A-D4-2020-01-29-R13	2020A-D4	60_F	4	3	L
2020A-D4-2020-01-29-R15	2020A-D4	60_F	5	4	L
2020A-D4-2020-01-29-R18	2020A-D4	60_F	4	3	L
2020A-D4-2020-01-29-R20	2020A-D4	60_F	3	3	L
2020A-D4-2020-01-29-R2	2020A-D4	60_F	1	6	L
2020A-D4-2020-01-29-R17	2020A-D4	60_F	1	5	L
2020A-D4-2020-01-29-R16	2020A-D4	60_F	5	4	L
2020A-D4-2020-01-29-R3	2020A-D4	60_F	5	5	L
2020A-D4-2020-01-29-R5	2020A-D4	60_F	3	5	L
2020A-D4-2020-01-29-R9	2020A-D4	60_F	1	4	L
2020A-D4-2020-01-29-R11	2020A-D4	60_F	7	5	L
2020A-D4-2020-01-29-R12	2020A-D4	60_F	1	3	L
2020A-D4-2020-01-29-R14	2020A-D4	60_F	3	5	L
2020A-D4-2020-01-29-R19	2020A-D4	60_F	3	2	L
2020A-D4-2020-01-29-R22	2020A-D4	60_F	2	2	L
2020A-D4-2020-01-29-R24	2020A-D4	60_F	5	6	L
2020A-D4-2020-01-29-R7	2020A-D4	60_F	4	6	L
2020A-D4-2020-01-29-R10	2020A-D4	60_F	2	6	L
2020A-D4-2020-01-29-R25	2020A-D4	60_F	6	6	L
2020A-D4-2020-01-29-R4	2020A-D4	60_F	2	5	L
2020A-D4-2020-01-29-R6	2020A-D4	60_F	5	1	L
2020A-D4-2020-01-29-R8	2020A-D4	60_F	2	4	L
2020A-D4-2020-01-29-R21	2020A-D4	60_F	3	6	L
2020A-D4-2020-01-29-R23	2020A-D4	60_F	4	2	L
2020A-D3-2020-01-28-R13	2020A-D3	61_F	4	3	R
2020A-D3-2020-01-28-R7	2020A-D3	61_F	4	4	R
2020A-D3-2020-01-28-R8	2020A-D3	61_F	2	4	R
2020A-D3-2020-01-28-R2	2020A-D3	61_F	6	4	R
2020A-D3-2020-01-28-R19	2020A-D3	61_F	6	5	R
2020A-D3-2020-01-28-R1	2020A-D3	61_F	5	6	R
2020A-D3-2020-01-28-R4	2020A-D3	61_F	4	3	R
2020A-D3-2020-01-28-R5	2020A-D3	61_F	5	3	R
2020A-D3-2020-01-28-R10	2020A-D3	61_F	7	3	R
2020A-D3-2020-01-28-R15	2020A-D3	61_F	6	2	R
2020A-D3-2020-01-28-R18	2020A-D3	61_F	4	2	R
2020A-D3-2020-01-28-R3	2020A-D3	61_F	3	6	R
2020A-D3-2020-01-28-R11	2020A-D3	61_F	6	3	R
2020A-D3-2020-01-28-R12	2020A-D3	61_F	2	3	R
2020A-D3-2020-01-28-R16	2020A-D3	61_F	4	3	R
2020A-D3-2020-01-28-R20	2020A-D3	61_F	4	6	R
2020A-D5-2020-01-30-R9	2020A-D5	63_F	5	2	R
2020A-D5-2020-01-30-R11	2020A-D5	63_F	5	4	R
2020A-D5-2020-01-30-R12	2020A-D5	63_F	4	3	R
2020A-D5-2020-01-30-R14	2020A-D5	63_F	4	4	R
2020A-D5-2020-01-30-R16	2020A-D5	63_F	6	3	R
2020A-D5-2020-01-30-R2	2020A-D5	63_F	6	5	R
2020A-D5-2020-01-30-R8	2020A-D5	63_F	5	4	R
2020A-D5-2020-01-30-R13	2020A-D5	63_F	5	3	R
2020A-D5-2020-01-30-R19	2020A-D5	63_F	5	3	R
2020A-D5-2020-01-30-R7	2020A-D5	63_F	7	4	R
2020A-D5-2020-01-30-R1	2020A-D5	63_F	3	5	R
2020A-D3-2020-01-28-R4	2020A-D3	66_F	5	3	R
2020A-D3-2020-01-28-R10	2020A-D3	66_F	3	4	R
2020A-D3-2020-01-28-R1	2020A-D3	66_F	5	4	R
2020A-D3-2020-01-28-R2	2020A-D3	66_F	7	4	R
2020A-D3-2020-01-28-R5	2020A-D3	66_F	5	3	R
2020A-D3-2020-01-28-R6	2020A-D3	66_F	5	4	R
2020A-D3-2020-01-28-R17	2020A-D3	66_F	2	3	R
2020A-D3-2020-01-28-R19	2020A-D3	66_F	5	5	R
2020A-D3-2020-01-28-R3	2020A-D3	66_F	7	4	R
2020A-D3-2020-01-28-R8	2020A-D3	66_F	3	6	R
2020A-D3-2020-01-28-R13	2020A-D3	66_F	5	4	R
2020A-D3-2020-01-28-R11	2020A-D3	66_F	4	3	R
2020A-D3-2020-01-28-R7	2020A-D3	66_F	4	4	R
2020A-D3-2020-01-28-R16	2020A-D3	66_F	3	2	R
2020A-D3-2020-01-28-R9	2020A-D3	66_F	4	7	R
2020A-D3-2020-01-28-R12	2020A-D3	66_F	1	4	R
2020A-D3-2020-01-28-R15	2020A-D3	66_F	5	4	R
2019B-D1-R1	2019B-D1	67_F	6	3	R
2019B-D1-R2	2019B-D1	67_F	3	4	R
2019B-D1-R3	2019B-D1	67_F	3	4	R
2019B-D1-R4	2019B-D1	67_F	6	5	R
2019B-D1-R6	2019B-D1	67_F	3	3	R
2019B-D1-R7	2019B-D1	67_F	4	5	R
2019B-D1-R8	2019B-D1	67_F	4	2	R
2019B-D1-R10	2019B-D1	67_F	5	3	R
2019B-D1-R13	2019B-D1	67_F	3	4	R
2019B-D1-R14	2019B-D1	67_F	2	4	R
2019B-D1-R16	2019B-D1	67_F	6	5	R
2019B-D1-R17	2019B-D1	67_F	6	3	R
2019B-D1-R18	2019B-D1	67_F	5	4	R
2019B-D1-R19	2019B-D1	67_F	5	6	R
2019B-D1-R20	2019B-D1	67_F	3	3	R
2019B-D1-R21	2019B-D1	67_F	4	3	R

## Sheet: Partner_atr_mas_rating
rater_ID	session_code	partner_ID	attractiveness_partner	masculinity_partner	armpit
2019B-D2-R1	2019B-D2	01_P	3	6	L
2019B-D2-R2	2019B-D2	01_P	2	2	L
2019B-D2-R3	2019B-D2	01_P	4	2	L
2019B-D2-R4	2019B-D2	01_P	2	3	L
2019B-D2-R5	2019B-D2	01_P	5	5	L
2019B-D2-R6	2019B-D2	01_P	2	1	L
2019B-D2-R7	2019B-D2	01_P	7	1	L
2019B-D2-R8	2019B-D2	01_P	4	6	L
2019B-D2-R9	2019B-D2	01_P	3	3	L
2019B-D2-R10	2019B-D2	01_P	1	6	L
2019B-D2-R11	2019B-D2	01_P	7	7	L
2019B-D2-R12	2019B-D2	01_P	1	1	L
2019B-D2-R13	2019B-D2	01_P	1	1	L
2019B-D2-R14	2019B-D2	01_P	5	4	L
2019B-D2-R15	2019B-D2	01_P	5	5	L
2019B-D2-R16	2019B-D2	01_P	4	1	L
2019B-D2-R17	2019B-D2	01_P	5	5	L
2019B-D2-R18	2019B-D2	01_P	3	3	L
2019B-D2-R19	2019B-D2	01_P	4	5	L
2019B-D2-R20	2019B-D2	01_P	5	7	L
2019B-D2-R21	2019B-D2	01_P	6	4	L
2019B-D2-R22	2019B-D2	01_P	4	1	L
2019B-D2-R23	2019B-D2	01_P	5	2	L
2019B-D2-R24	2019B-D2	01_P	6	7	L
2019B-D4-R1	2019B-D4	02_P	3	3	L
2019B-D4-R2	2019B-D4	02_P	6	4	L
2019B-D4-R4	2019B-D4	02_P	4	4	L
2019B-D4-R5	2019B-D4	02_P	3	3	L
2019B-D4-R6	2019B-D4	02_P	1	1	L
2019B-D4-R7	2019B-D4	02_P	5	2	L
2019B-D4-R8	2019B-D4	02_P	3	7	L
2019B-D4-R9	2019B-D4	02_P	1	1	L
2019B-D4-R10	2019B-D4	02_P	2	3	L
2019B-D4-R11	2019B-D4	02_P	3	5	L
2019B-D4-R12	2019B-D4	02_P	1	4	L
2019B-D4-R13	2019B-D4	02_P	2	5	L
2019B-D4-R14	2019B-D4	02_P	3	3	L
2019B-D4-R15	2019B-D4	02_P	2	3	L
2019B-D4-R16	2019B-D4	02_P	2	4	L
2019B-D4-R17	2019B-D4	02_P	3	4	L
2019B-D4-R18	2019B-D4	02_P	3	4	L
2019B-D4-R19	2019B-D4	02_P	3	5	L
2019B-D4-R20	2019B-D4	02_P	2	3	L
2020A-D5-2020-01-30-R4	2020A-D5	03_P	4	3	R
2020A-D5-2020-01-30-R8	2020A-D5	03_P	6	3	R
2020A-D5-2020-01-30-R13	2020A-D5	03_P	4	6	R
2020A-D5-2020-01-30-R15	2020A-D5	03_P	5	5	R
2020A-D5-2020-01-30-R9	2020A-D5	03_P	2	5	R
2020A-D5-2020-01-30-R2	2020A-D5	03_P	5	4	R
2020A-D5-2020-01-30-R6	2020A-D5	03_P	4	2	R
2020A-D5-2020-01-30-R3	2020A-D5	03_P	2	5	R
2020A-D5-2020-01-30-R11	2020A-D5	03_P	2	4	R
2020A-D5-2020-01-30-R19	2020A-D5	03_P	2	3	R
2020A-D5-2020-01-30-R20	2020A-D5	03_P	2	4	R
2020A-D5-2020-01-30-R1	2020A-D5	03_P	5	5	R
2020A-D5-2020-01-30-R14	2020A-D5	03_P	4	4	R
2020A-D5-2020-01-30-R22	2020A-D5	03_P	7	5	R
2020A-D5-2020-01-30-R7	2020A-D5	03_P	7	6	R
2020A-D5-2020-01-30-R12	2020A-D5	03_P	5	5	R
2020A-D5-2020-01-30-R16	2020A-D5	03_P	5	5	R
2020A-D5-2020-01-30-R17	2020A-D5	03_P	6	3	R
2020A-D5-2020-01-30-R21	2020A-D5	03_P	6	5	R
2020A-D5-2020-01-30-R10	2020A-D5	03_P	7	5	R
2020A-D5-2020-01-30-R18	2020A-D5	03_P	5	3	R
2019B-D1-R1	2019B-D1	04_P	4	4	R
2019B-D1-R2	2019B-D1	04_P	4	3	R
2019B-D1-R3	2019B-D1	04_P	2	3	R
2019B-D1-R4	2019B-D1	04_P	4	3	R
2019B-D1-R5	2019B-D1	04_P	5	2	R
2019B-D1-R7	2019B-D1	04_P	5	6	R
2019B-D1-R9	2019B-D1	04_P	7	3	R
2019B-D1-R10	2019B-D1	04_P	7	2	R
2019B-D1-R13	2019B-D1	04_P	5	2	R
2019B-D1-R14	2019B-D1	04_P	2	4	R
2019B-D1-R15	2019B-D1	04_P	5	4	R
2019B-D1-R16	2019B-D1	04_P	3	4	R
2019B-D1-R17	2019B-D1	04_P	5	5	R
2019B-D1-R18	2019B-D1	04_P	5	4	R
2019B-D1-R19	2019B-D1	04_P	5	5	R
2019B-D1-R1	2019B-D1	05_P	2	5	R
2019B-D1-R2	2019B-D1	05_P	1	4	R
2019B-D1-R3	2019B-D1	05_P	3	2	R
2019B-D1-R4	2019B-D1	05_P	5	5	R
2019B-D1-R5	2019B-D1	05_P	2	2	R
2019B-D1-R6	2019B-D1	05_P	3	2	R
2019B-D1-R9	2019B-D1	05_P	6	3	R
2019B-D1-R13	2019B-D1	05_P	5	2	R
2019B-D1-R14	2019B-D1	05_P	4	4	R
2019B-D1-R16	2019B-D1	05_P	5	3	R
2019B-D1-R17	2019B-D1	05_P	5	1	R
2019B-D1-R18	2019B-D1	05_P	4	4	R
2019B-D1-R20	2019B-D1	05_P	4	3	R
2019B-D1-R22	2019B-D1	05_P	3	4	R
2019B-D3-R1	2019B-D3	07_P	1	7	R
2019B-D3-R2	2019B-D3	07_P	2	6	R
2019B-D3-R3	2019B-D3	07_P	2	3	R
2019B-D3-R4	2019B-D3	07_P	4	3	R
2019B-D3-R5	2019B-D3	07_P	6	6	R
2019B-D3-R6	2019B-D3	07_P	3	5	R
2019B-D3-R7	2019B-D3	07_P	4	4	R
2019B-D3-R8	2019B-D3	07_P	2	6	R
2019B-D3-R9	2019B-D3	07_P	2	5	R
2019B-D3-R10	2019B-D3	07_P	6	4	R
2019B-D3-R12	2019B-D3	07_P	4	5	R
2019B-D3-R13	2019B-D3	07_P	4	5	R
2019B-D3-R14	2019B-D3	07_P	7	6	R
2019B-D3-R15	2019B-D3	07_P	4	5	R
2019B-D3-R16	2019B-D3	07_P	5	4	R
2019B-D3-R17	2019B-D3	07_P	6	5	R
2019B-D3-R18	2019B-D3	07_P	3	4	R
2019B-D3-R19	2019B-D3	07_P	2	6	R
2019B-D3-R20	2019B-D3	07_P	3	2	R
2019B-D3-R21	2019B-D3	07_P	2	6	R
2019B-D3-R22	2019B-D3	07_P	5	4	R
2019B-D3-R23	2019B-D3	07_P	2	5	R
2019B-D3-R24	2019B-D3	07_P	6	4	R
2020A-D3-2020-01-28-R3	2020A-D3	13_P	5	5	R
2020A-D3-2020-01-28-R19	2020A-D3	13_P	3	3	R
2020A-D3-2020-01-28-R8	2020A-D3	13_P	5	3	R
2020A-D3-2020-01-28-R12	2020A-D3	13_P	4	1	R
2020A-D3-2020-01-28-R5	2020A-D3	13_P	2	3	R
2020A-D3-2020-01-28-R9	2020A-D3	13_P	3	3	R
2020A-D3-2020-01-28-R15	2020A-D3	13_P	2	5	R
2020A-D3-2020-01-28-R20	2020A-D3	13_P	4	4	R
2020A-D3-2020-01-28-R1	2020A-D3	13_P	3	6	R
2020A-D3-2020-01-28-R10	2020A-D3	13_P	6	5	R
2020A-D3-2020-01-28-R14	2020A-D3	13_P	5	4	R
2020A-D3-2020-01-28-R13	2020A-D3	13_P	5	4	R
2020A-D3-2020-01-28-R4	2020A-D3	13_P	4	3	R
2020A-D3-2020-01-28-R7	2020A-D3	13_P	5	5	R
2020A-D3-2020-01-28-R11	2020A-D3	13_P	5	4	R
2020A-D3-2020-01-28-R2	2020A-D3	13_P	4	4	R
2020A-D3-2020-01-28-R6	2020A-D3	13_P	5	6	R
2020A-D4-2020-01-29-R3	2020A-D4	14_P	5	4	L
2020A-D4-2020-01-29-R9	2020A-D4	14_P	4	4	L
2020A-D4-2020-01-29-R10	2020A-D4	14_P	1	7	L
2020A-D4-2020-01-29-R14	2020A-D4	14_P	5	3	L
2020A-D4-2020-01-29-R15	2020A-D4	14_P	5	5	L
2020A-D4-2020-01-29-R23	2020A-D4	14_P	3	3	L
2020A-D4-2020-01-29-R8	2020A-D4	14_P	5	4	L
2020A-D4-2020-01-29-R24	2020A-D4	14_P	5	5	L
2020A-D4-2020-01-29-R21	2020A-D4	14_P	4	5	L
2020A-D4-2020-01-29-R12	2020A-D4	14_P	3	6	L
2020A-D4-2020-01-29-R22	2020A-D4	14_P	1	1	L
2020A-D4-2020-01-29-R7	2020A-D4	14_P	6	3	L
2020A-D4-2020-01-29-R4	2020A-D4	14_P	4	4	L
2020A-D4-2020-01-29-R20	2020A-D4	14_P	3	5	L
2020A-D4-2020-01-29-R2	2020A-D4	14_P	6	1	L
2020A-D4-2020-01-29-R6	2020A-D4	14_P	5	2	L
2020A-D4-2020-01-29-R1	2020A-D4	14_P	4	4	L
2020A-D4-2020-01-29-R18	2020A-D4	14_P	3	6	L
2020A-D4-2020-01-29-R23	2020A-D4	15_P	3	6	L
2020A-D4-2020-01-29-R8	2020A-D4	15_P	4	4	L
2020A-D4-2020-01-29-R21	2020A-D4	15_P	4	4	L
2020A-D4-2020-01-29-R25	2020A-D4	15_P	6	6	L
2020A-D4-2020-01-29-R6	2020A-D4	15_P	5	4	L
2020A-D4-2020-01-29-R20	2020A-D4	15_P	3	7	L
2020A-D4-2020-01-29-R5	2020A-D4	15_P	5	3	L
2020A-D4-2020-01-29-R13	2020A-D4	15_P	4	3	L
2020A-D4-2020-01-29-R26	2020A-D4	15_P	3	4	L
2020A-D4-2020-01-29-R3	2020A-D4	15_P	6	6	L
2020A-D4-2020-01-29-R4	2020A-D4	15_P	4	5	L
2020A-D4-2020-01-29-R10	2020A-D4	15_P	2	5	L
2020A-D4-2020-01-29-R2	2020A-D4	15_P	1	5	L
2020A-D4-2020-01-29-R14	2020A-D4	15_P	3	3	L
2020A-D4-2020-01-29-R22	2020A-D4	15_P	1	2	L
2020A-D4-2020-01-29-R15	2020A-D4	15_P	7	5	L
2020A-D4-2020-01-29-R24	2020A-D4	15_P	5	4	L
2020A-D4-2020-01-29-R18	2020A-D4	15_P	2	5	L
2020A-D4-2020-01-29-R7	2020A-D4	15_P	5	2	L
2020A-D4-2020-01-29-R19	2020A-D4	15_P	1	4	L
2020A-D4-2020-01-29-R12	2020A-D4	15_P	3	3	L
2020A-D3-2020-01-28-R6	2020A-D3	16_P	3	5	R
2020A-D3-2020-01-28-R14	2020A-D3	16_P	4	4	R
2020A-D3-2020-01-28-R9	2020A-D3	16_P	3	3	R
2020A-D3-2020-01-28-R10	2020A-D3	16_P	2	6	R
2020A-D3-2020-01-28-R18	2020A-D3	16_P	5	5	R
2020A-D3-2020-01-28-R11	2020A-D3	16_P	5	4	R
2020A-D3-2020-01-28-R15	2020A-D3	16_P	4	3	R
2020A-D3-2020-01-28-R4	2020A-D3	16_P	5	5	R
2020A-D3-2020-01-28-R13	2020A-D3	16_P	5	4	R
2020A-D3-2020-01-28-R12	2020A-D3	16_P	1	2	R
2020A-D3-2020-01-28-R5	2020A-D3	16_P	6	6	R
2020A-D3-2020-01-28-R17	2020A-D3	16_P	3	4	R
2020A-D3-2020-01-28-R2	2020A-D3	16_P	6	4	R
2020A-D3-2020-01-28-R19	2020A-D3	16_P	6	6	R
2020A-D3-2020-01-28-R8	2020A-D3	16_P	3	4	R
2020A-D3-2020-01-28-R20	2020A-D3	16_P	5	5	R
2020A-D3-2020-01-28-R1	2020A-D3	16_P	3	6	R
2020A-D3-2020-01-28-R3	2020A-D3	16_P	4	5	R
2020A-D3-2020-01-28-R1	2020A-D3	17_P	2	6	R
2020A-D3-2020-01-28-R18	2020A-D3	17_P	4	4	R
2020A-D3-2020-01-28-R11	2020A-D3	17_P	4	4	R
2020A-D3-2020-01-28-R15	2020A-D3	17_P	4	3	R
2020A-D3-2020-01-28-R3	2020A-D3	17_P	7	6	R
2020A-D3-2020-01-28-R6	2020A-D3	17_P	4	3	R
2020A-D3-2020-01-28-R4	2020A-D3	17_P	4	3	R
2020A-D3-2020-01-28-R9	2020A-D3	17_P	3	6	R
2020A-D3-2020-01-28-R12	2020A-D3	17_P	1	2	R
2020A-D3-2020-01-28-R20	2020A-D3	17_P	3	5	R
2020A-D3-2020-01-28-R13	2020A-D3	17_P	3	4	R
2020A-D3-2020-01-28-R2	2020A-D3	17_P	3	5	R
2020A-D3-2020-01-28-R10	2020A-D3	17_P	7	5	R
2020A-D3-2020-01-28-R5	2020A-D3	17_P	6	6	R
2020A-D3-2020-01-28-R17	2020A-D3	17_P	2	4	R
2020A-D3-2020-01-28-R14	2020A-D3	17_P	5	4	R
2020A-D3-2020-01-28-R19	2020A-D3	17_P	3	4	R
2020A-D3-2020-01-28-R8	2020A-D3	17_P	2	2	R
2019B-D5-R1	2019B-D5	18_P	3	2	R
2019B-D5-R3	2019B-D5	18_P	2	3	R
2019B-D5-R4	2019B-D5	18_P	4	3	R
2019B-D5-R5	2019B-D5	18_P	6	4	R
2019B-D5-R6	2019B-D5	18_P	4	4	R
2019B-D5-R7	2019B-D5	18_P	4	3	R
2019B-D5-R8	2019B-D5	18_P	4	5	R
2019B-D5-R9	2019B-D5	18_P	5	5	R
2019B-D5-R10	2019B-D5	18_P	3	4	R
2019B-D5-R11	2019B-D5	18_P	5	5	R
2019B-D5-R12	2019B-D5	18_P	5	4	R
2019B-D5-R13	2019B-D5	18_P	4	2	R
2019B-D5-R14	2019B-D5	18_P	2	3	R
2019B-D5-R15	2019B-D5	18_P	6	2	R
2019B-D5-R16	2019B-D5	18_P	7	4	R
2019B-D5-R18	2019B-D5	18_P	7	1	R
2019B-D5-R19	2019B-D5	18_P	5	3	R
2019B-D5-R20	2019B-D5	18_P	3	5	R
2019B-D4-R1	2019B-D4	19_P	2	5	L
2019B-D4-R2	2019B-D4	19_P	4	4	L
2019B-D4-R3	2019B-D4	19_P	6	5	L
2019B-D4-R4	2019B-D4	19_P	3	3	L
2019B-D4-R5	2019B-D4	19_P	5	3	L
2019B-D4-R6	2019B-D4	19_P	2	1	L
2019B-D4-R7	2019B-D4	19_P	4	5	L
2019B-D4-R8	2019B-D4	19_P	3	3	L
2019B-D4-R10	2019B-D4	19_P	3	4	L
2019B-D4-R11	2019B-D4	19_P	3	4	L
2019B-D4-R12	2019B-D4	19_P	3	3	L
2019B-D4-R13	2019B-D4	19_P	5	5	L
2019B-D4-R14	2019B-D4	19_P	3	2	L
2019B-D4-R15	2019B-D4	19_P	3	5	L
2019B-D4-R16	2019B-D4	19_P	6	6	L
2019B-D4-R19	2019B-D4	19_P	5	2	L
2019B-D4-R20	2019B-D4	19_P	5	5	L
2019B-D5-R1	2019B-D5	21_P	4	2	R
2019B-D5-R2	2019B-D5	21_P	5	4	R
2019B-D5-R3	2019B-D5	21_P	2	1	R
2019B-D5-R4	2019B-D5	21_P	7	6	R
2019B-D5-R5	2019B-D5	21_P	7	6	R
2019B-D5-R6	2019B-D5	21_P	4	5	R
2019B-D5-R7	2019B-D5	21_P	6	2	R
2019B-D5-R8	2019B-D5	21_P	5	5	R
2019B-D5-R9	2019B-D5	21_P	6	4	R
2019B-D5-R10	2019B-D5	21_P	2	6	R
2019B-D5-R11	2019B-D5	21_P	3	5	R
2019B-D5-R12	2019B-D5	21_P	1	3	R
2019B-D5-R13	2019B-D5	21_P	6	6	R
2019B-D5-R14	2019B-D5	21_P	2	3	R
2019B-D5-R15	2019B-D5	21_P	3	4	R
2019B-D5-R17	2019B-D5	21_P	6	5	R
2019B-D5-R18	2019B-D5	21_P	5	5	R
2019B-D5-R19	2019B-D5	21_P	6	6	R
2019B-D5-R20	2019B-D5	21_P	3	3	R
2020A-D4-2020-01-29-R1	2020A-D4	25_P	4	4	L
2020A-D4-2020-01-29-R25	2020A-D4	25_P	5	6	L
2020A-D4-2020-01-29-R18	2020A-D4	25_P	4	6	L
2020A-D4-2020-01-29-R11	2020A-D4	25_P	6	3	L
2020A-D4-2020-01-29-R12	2020A-D4	25_P	3	2	L
2020A-D4-2020-01-29-R5	2020A-D4	25_P	6	3	L
2020A-D4-2020-01-29-R21	2020A-D4	25_P	4	5	L
2020A-D4-2020-01-29-R2	2020A-D4	25_P	1	4	L
2020A-D4-2020-01-29-R6	2020A-D4	25_P	6	4	L
2020A-D4-2020-01-29-R10	2020A-D4	25_P	1	4	L
2020A-D4-2020-01-29-R14	2020A-D4	25_P	4	4	L
2020A-D4-2020-01-29-R7	2020A-D4	25_P	3	5	L
2020A-D4-2020-01-29-R8	2020A-D4	25_P	5	5	L
2020A-D4-2020-01-29-R13	2020A-D4	25_P	5	4	L
2020A-D4-2020-01-29-R26	2020A-D4	25_P	4	3	L
2020A-D4-2020-01-29-R15	2020A-D4	25_P	3	5	L
2020A-D4-2020-01-29-R3	2020A-D4	25_P	6	6	L
2020A-D4-2020-01-29-R20	2020A-D4	25_P	3	1	L
2019B-D1-R1	2019B-D1	28_P	5	2	R
2019B-D1-R2	2019B-D1	28_P	2	4	R
2019B-D1-R3	2019B-D1	28_P	3	3	R
2019B-D1-R4	2019B-D1	28_P	2	3	R
2019B-D1-R5	2019B-D1	28_P	2	1	R
2019B-D1-R6	2019B-D1	28_P	2	2	R
2019B-D1-R7	2019B-D1	28_P	5	5	R
2019B-D1-R8	2019B-D1	28_P	7	6	R
2019B-D1-R9	2019B-D1	28_P	6	3	R
2019B-D1-R10	2019B-D1	28_P	7	2	R
2019B-D1-R11	2019B-D1	28_P	4	4	R
2019B-D1-R13	2019B-D1	28_P	3	5	R
2019B-D1-R14	2019B-D1	28_P	2	4	R
2019B-D1-R15	2019B-D1	28_P	4	3	R
2019B-D1-R17	2019B-D1	28_P	2	6	R
2019B-D1-R18	2019B-D1	28_P	5	3	R
2019B-D1-R19	2019B-D1	28_P	3	5	R
2019B-D1-R22	2019B-D1	28_P	4	3	R
2019B-D5-R1	2019B-D5	29_P	2	3	R
2019B-D5-R2	2019B-D5	29_P	3	3	R
2019B-D5-R3	2019B-D5	29_P	1	3	R
2019B-D5-R4	2019B-D5	29_P	7	6	R
2019B-D5-R5	2019B-D5	29_P	2	2	R
2019B-D5-R6	2019B-D5	29_P	3	3	R
2019B-D5-R7	2019B-D5	29_P	5	3	R
2019B-D5-R8	2019B-D5	29_P	4	5	R
2019B-D5-R9	2019B-D5	29_P	2	4	R
2019B-D5-R10	2019B-D5	29_P	1	3	R
2019B-D5-R11	2019B-D5	29_P	4	5	R
2019B-D5-R12	2019B-D5	29_P	2	2	R
2019B-D5-R14	2019B-D5	29_P	2	4	R
2019B-D5-R15	2019B-D5	29_P	4	2	R
2019B-D5-R16	2019B-D5	29_P	4	4	R
2019B-D5-R17	2019B-D5	29_P	5	4	R
2019B-D5-R18	2019B-D5	29_P	6	6	R
2019B-D5-R19	2019B-D5	29_P	4	4	R
2019B-D5-R20	2019B-D5	29_P	2	6	R
2020A-D4-2020-01-29-R12	2020A-D4	30_P	3	3	L
2020A-D4-2020-01-29-R7	2020A-D4	30_P	3	5	L
2020A-D4-2020-01-29-R11	2020A-D4	30_P	6	6	L
2020A-D4-2020-01-29-R16	2020A-D4	30_P	5	5	L
2020A-D4-2020-01-29-R9	2020A-D4	30_P	2	2	L
2020A-D4-2020-01-29-R14	2020A-D4	30_P	4	3	L
2020A-D4-2020-01-29-R24	2020A-D4	30_P	4	6	L
2020A-D4-2020-01-29-R8	2020A-D4	30_P	4	4	L
2020A-D4-2020-01-29-R17	2020A-D4	30_P	3	3	L
2020A-D4-2020-01-29-R25	2020A-D4	30_P	6	6	L
2020A-D4-2020-01-29-R18	2020A-D4	30_P	5	5	L
2020A-D4-2020-01-29-R4	2020A-D4	30_P	3	5	L
2020A-D4-2020-01-29-R21	2020A-D4	30_P	3	6	L
2020A-D4-2020-01-29-R6	2020A-D4	30_P	5	5	L
2020A-D4-2020-01-29-R23	2020A-D4	30_P	2	7	L
2020A-D4-2020-01-29-R20	2020A-D4	30_P	4	3	L
2020A-D4-2020-01-29-R1	2020A-D4	30_P	2	4	L
2020A-D4-2020-01-29-R5	2020A-D4	30_P	5	4	L
2020A-D4-2020-01-29-R13	2020A-D4	30_P	4	6	L
2020A-D4-2020-01-29-R2	2020A-D4	30_P	1	7	L
2020A-D4-2020-01-29-R10	2020A-D4	30_P	5	3	L
2020A-D4-2020-01-29-R3	2020A-D4	30_P	6	6	L
2020A-D4-2020-01-29-R15	2020A-D4	30_P	7	6	L
2019B-D1-R1	2019B-D1	31_P	2	6	R
2019B-D1-R2	2019B-D1	31_P	1	6	R
2019B-D1-R3	2019B-D1	31_P	1	1	R
2019B-D1-R4	2019B-D1	31_P	5	4	R
2019B-D1-R5	2019B-D1	31_P	1	3	R
2019B-D1-R6	2019B-D1	31_P	1	1	R
2019B-D1-R7	2019B-D1	31_P	1	1	R
2019B-D1-R8	2019B-D1	31_P	2	2	R
2019B-D1-R9	2019B-D1	31_P	2	4	R
2019B-D1-R10	2019B-D1	31_P	1	6	R
2019B-D1-R11	2019B-D1	31_P	3	1	R
2019B-D1-R12	2019B-D1	31_P	4	4	R
2019B-D1-R13	2019B-D1	31_P	1	3	R
2019B-D1-R14	2019B-D1	31_P	2	4	R
2019B-D1-R15	2019B-D1	31_P	1	5	R
2019B-D1-R16	2019B-D1	31_P	1	4	R
2019B-D1-R17	2019B-D1	31_P	1	7	R
2019B-D1-R18	2019B-D1	31_P	1	4	R
2019B-D1-R19	2019B-D1	31_P	2	6	R
2019B-D1-R20	2019B-D1	31_P	1	4	R
2019B-D1-R21	2019B-D1	31_P	1	5	R
2019B-D1-R22	2019B-D1	31_P	2	4	R
2019B-D5-R1	2019B-D5	32_P	2	5	R
2019B-D5-R2	2019B-D5	32_P	4	5	R
2019B-D5-R3	2019B-D5	32_P	2	1	R
2019B-D5-R4	2019B-D5	32_P	5	3	R
2019B-D5-R5	2019B-D5	32_P	4	4	R
2019B-D5-R6	2019B-D5	32_P	5	4	R
2019B-D5-R7	2019B-D5	32_P	2	6	R
2019B-D5-R8	2019B-D5	32_P	3	5	R
2019B-D5-R9	2019B-D5	32_P	6	5	R
2019B-D5-R10	2019B-D5	32_P	3	6	R
2019B-D5-R11	2019B-D5	32_P	5	4	R
2019B-D5-R12	2019B-D5	32_P	4	6	R
2019B-D5-R13	2019B-D5	32_P	7	5	R
2019B-D5-R14	2019B-D5	32_P	4	2	R
2019B-D5-R15	2019B-D5	32_P	6	4	R
2019B-D5-R16	2019B-D5	32_P	4	4	R
2019B-D5-R17	2019B-D5	32_P	5	3	R
2019B-D5-R18	2019B-D5	32_P	1	6	R
2019B-D5-R19	2019B-D5	32_P	5	1	R
2019B-D5-R20	2019B-D5	32_P	2	5	R
2019B-D4-R1	2019B-D4	33_P	3	5	L
2019B-D4-R2	2019B-D4	33_P	4	5	L
2019B-D4-R3	2019B-D4	33_P	5	5	L
2019B-D4-R4	2019B-D4	33_P	2	7	L
2019B-D4-R5	2019B-D4	33_P	2	6	L
2019B-D4-R6	2019B-D4	33_P	2	6	L
2019B-D4-R7	2019B-D4	33_P	2	5	L
2019B-D4-R8	2019B-D4	33_P	5	2	L
2019B-D4-R9	2019B-D4	33_P	1	1	L
2019B-D4-R10	2019B-D4	33_P	2	5	L
2019B-D4-R11	2019B-D4	33_P	1	7	L
2019B-D4-R12	2019B-D4	33_P	2	5	L
2019B-D4-R13	2019B-D4	33_P	2	6	L
2019B-D4-R14	2019B-D4	33_P	2	2	L
2019B-D4-R15	2019B-D4	33_P	2	5	L
2019B-D4-R16	2019B-D4	33_P	2	6	L
2019B-D4-R17	2019B-D4	33_P	3	5	L
2019B-D4-R18	2019B-D4	33_P	4	4	L
2019B-D4-R19	2019B-D4	33_P	2	7	L
2019B-D4-R20	2019B-D4	33_P	1	5	L
2019B-D2-R1	2019B-D2	34_P	5	1	L
2019B-D2-R2	2019B-D2	34_P	3	4	L
2019B-D2-R3	2019B-D2	34_P	4	4	L
2019B-D2-R4	2019B-D2	34_P	7	5	L
2019B-D2-R5	2019B-D2	34_P	6	3	L
2019B-D2-R6	2019B-D2	34_P	4	5	L
2019B-D2-R7	2019B-D2	34_P	6	2	L
2019B-D2-R8	2019B-D2	34_P	4	3	L
2019B-D2-R9	2019B-D2	34_P	7	1	L
2019B-D2-R11	2019B-D2	34_P	2	2	L
2019B-D2-R12	2019B-D2	34_P	5	3	L
2019B-D2-R13	2019B-D2	34_P	1	1	L
2019B-D2-R14	2019B-D2	34_P	6	4	L
2019B-D2-R15	2019B-D2	34_P	5	6	L
2019B-D2-R16	2019B-D2	34_P	3	6	L
2019B-D2-R17	2019B-D2	34_P	4	2	L
2019B-D2-R18	2019B-D2	34_P	3	4	L
2019B-D2-R19	2019B-D2	34_P	4	6	L
2019B-D2-R20	2019B-D2	34_P	1	2	L
2019B-D2-R21	2019B-D2	34_P	5	1	L
2019B-D2-R22	2019B-D2	34_P	2	2	L
2019B-D2-R23	2019B-D2	34_P	5	3	L
2020A-D5-2020-01-30-R18	2020A-D5	36_P	5	2	R
2020A-D5-2020-01-30-R3	2020A-D5	36_P	6	4	R
2020A-D5-2020-01-30-R20	2020A-D5	36_P	2	4	R
2020A-D5-2020-01-30-R1	2020A-D5	36_P	5	4	R
2020A-D5-2020-01-30-R10	2020A-D5	36_P	4	4	R
2020A-D5-2020-01-30-R11	2020A-D5	36_P	6	6	R
2020A-D5-2020-01-30-R15	2020A-D5	36_P	6	3	R
2020A-D5-2020-01-30-R19	2020A-D5	36_P	5	3	R
2020A-D5-2020-01-30-R12	2020A-D5	36_P	4	4	R
2020A-D5-2020-01-30-R9	2020A-D5	36_P	6	5	R
2020A-D5-2020-01-30-R21	2020A-D5	36_P	5	3	R
2020A-D5-2020-01-30-R14	2020A-D5	36_P	6	6	R
2020A-D5-2020-01-30-R16	2020A-D5	36_P	4	5	R
2020A-D5-2020-01-30-R2	2020A-D5	36_P	4	4	R
2020A-D5-2020-01-30-R8	2020A-D5	36_P	5	4	R
2020A-D5-2020-01-30-R13	2020A-D5	36_P	6	2	R
2019B-D2-R1	2019B-D2	37_P	5	6	L
2019B-D2-R3	2019B-D2	37_P	5	3	L
2019B-D2-R4	2019B-D2	37_P	5	4	L
2019B-D2-R6	2019B-D2	37_P	4	4	L
2019B-D2-R7	2019B-D2	37_P	5	3	L
2019B-D2-R8	2019B-D2	37_P	5	3	L
2019B-D2-R9	2019B-D2	37_P	4	4	L
2019B-D2-R10	2019B-D2	37_P	2	3	L
2019B-D2-R11	2019B-D2	37_P	5	5	L
2019B-D2-R12	2019B-D2	37_P	2	3	L
2019B-D2-R13	2019B-D2	37_P	1	1	L
2019B-D2-R14	2019B-D2	37_P	6	2	L
2019B-D2-R17	2019B-D2	37_P	4	4	L
2019B-D2-R18	2019B-D2	37_P	7	7	L
2019B-D2-R19	2019B-D2	37_P	4	4	L
2019B-D2-R22	2019B-D2	37_P	3	1	L
2019B-D2-R23	2019B-D2	37_P	5	3	L
2019B-D2-R24	2019B-D2	37_P	6	5	L
2019B-D3-R1	2019B-D3	39_P	4	3	R
2019B-D3-R2	2019B-D3	39_P	2	2	R
2019B-D3-R3	2019B-D3	39_P	4	3	R
2019B-D3-R4	2019B-D3	39_P	5	4	R
2019B-D3-R5	2019B-D3	39_P	2	5	R
2019B-D3-R6	2019B-D3	39_P	6	5	R
2019B-D3-R7	2019B-D3	39_P	2	4	R
2019B-D3-R8	2019B-D3	39_P	5	5	R
2019B-D3-R11	2019B-D3	39_P	5	2	R
2019B-D3-R12	2019B-D3	39_P	4	4	R
2019B-D3-R16	2019B-D3	39_P	5	3	R
2019B-D3-R17	2019B-D3	39_P	2	2	R
2019B-D3-R18	2019B-D3	39_P	4	4	R
2019B-D3-R19	2019B-D3	39_P	4	3	R
2019B-D3-R20	2019B-D3	39_P	2	3	R
2019B-D3-R21	2019B-D3	39_P	4	4	R
2019B-D3-R23	2019B-D3	39_P	4	3	R
2019B-D3-R24	2019B-D3	39_P	4	6	R
2019B-D2-R1	2019B-D2	40_P	5	6	L
2019B-D2-R2	2019B-D2	40_P	3	3	L
2019B-D2-R3	2019B-D2	40_P	4	6	L
2019B-D2-R4	2019B-D2	40_P	3	5	L
2019B-D2-R5	2019B-D2	40_P	4	3	L
2019B-D2-R6	2019B-D2	40_P	3	1	L
2019B-D2-R7	2019B-D2	40_P	2	5	L
2019B-D2-R8	2019B-D2	40_P	3	5	L
2019B-D2-R9	2019B-D2	40_P	3	3	L
2019B-D2-R10	2019B-D2	40_P	1	5	L
2019B-D2-R11	2019B-D2	40_P	4	6	L
2019B-D2-R12	2019B-D2	40_P	1	2	L
2019B-D2-R14	2019B-D2	40_P	3	2	L
2019B-D2-R15	2019B-D2	40_P	5	4	L
2019B-D2-R16	2019B-D2	40_P	4	4	L
2019B-D2-R17	2019B-D2	40_P	5	5	L
2019B-D2-R18	2019B-D2	40_P	3	2	L
2019B-D2-R19	2019B-D2	40_P	6	5	L
2019B-D2-R20	2019B-D2	40_P	1	5	L
2019B-D2-R21	2019B-D2	40_P	3	5	L
2019B-D2-R22	2019B-D2	40_P	3	1	L
2019B-D2-R23	2019B-D2	40_P	4	5	L
2019B-D2-R24	2019B-D2	40_P	2	7	L
2020A-D4-2020-01-29-R5	2020A-D4	43_P	4	2	L
2020A-D4-2020-01-29-R2	2020A-D4	43_P	2	5	L
2020A-D4-2020-01-29-R6	2020A-D4	43_P	3	3	L
2020A-D4-2020-01-29-R22	2020A-D4	43_P	2	2	L
2020A-D4-2020-01-29-R3	2020A-D4	43_P	5	6	L
2020A-D4-2020-01-29-R7	2020A-D4	43_P	6	3	L
2020A-D4-2020-01-29-R4	2020A-D4	43_P	4	3	L
2020A-D4-2020-01-29-R15	2020A-D4	43_P	7	4	L
2020A-D4-2020-01-29-R23	2020A-D4	43_P	3	3	L
2020A-D4-2020-01-29-R20	2020A-D4	43_P	2	3	L
2020A-D4-2020-01-29-R1	2020A-D4	43_P	4	5	L
2020A-D4-2020-01-29-R25	2020A-D4	43_P	5	4	L
2020A-D4-2020-01-29-R18	2020A-D4	43_P	5	5	L
2020A-D4-2020-01-29-R21	2020A-D4	43_P	5	2	L
2020A-D4-2020-01-29-R12	2020A-D4	43_P	3	3	L
2020A-D4-2020-01-29-R9	2020A-D4	43_P	4	4	L
2020A-D4-2020-01-29-R24	2020A-D4	43_P	7	5	L
2020A-D4-2020-01-29-R17	2020A-D4	43_P	3	5	L
2020A-D4-2020-01-29-R14	2020A-D4	43_P	3	3	L
2020A-D5-2020-01-30-R2	2020A-D5	44_P	4	4	R
2020A-D5-2020-01-30-R10	2020A-D5	44_P	4	4	R
2020A-D5-2020-01-30-R15	2020A-D5	44_P	3	5	R
2020A-D5-2020-01-30-R19	2020A-D5	44_P	3	4	R
2020A-D5-2020-01-30-R1	2020A-D5	44_P	2	4	R
2020A-D5-2020-01-30-R17	2020A-D5	44_P	5	6	R
2020A-D5-2020-01-30-R6	2020A-D5	44_P	4	4	R
2020A-D5-2020-01-30-R18	2020A-D5	44_P	4	5	R
2020A-D5-2020-01-30-R4	2020A-D5	44_P	3	6	R
2020A-D5-2020-01-30-R20	2020A-D5	44_P	4	4	R
2020A-D5-2020-01-30-R22	2020A-D5	44_P	2	5	R
2020A-D5-2020-01-30-R3	2020A-D5	44_P	1	5	R
2020A-D5-2020-01-30-R7	2020A-D5	44_P	2	6	R
2020A-D5-2020-01-30-R11	2020A-D5	44_P	4	4	R
2020A-D5-2020-01-30-R12	2020A-D5	44_P	2	5	R
2020A-D5-2020-01-30-R5	2020A-D5	44_P	2	4	R
2020A-D5-2020-01-30-R9	2020A-D5	44_P	2	7	R
2020A-D5-2020-01-30-R13	2020A-D5	44_P	3	5	R
2020A-D5-2020-01-30-R21	2020A-D5	44_P	5	5	R
2020A-D5-2020-01-30-R8	2020A-D5	44_P	3	3	R
2020A-D5-2020-01-30-R16	2020A-D5	44_P	5	5	R
2020A-D5-2020-01-30-R14	2020A-D5	44_P	4	5	R
2019B-D3-R1	2019B-D3	45_P	2	5	R
2019B-D3-R2	2019B-D3	45_P	3	4	R
2019B-D3-R3	2019B-D3	45_P	3	4	R
2019B-D3-R4	2019B-D3	45_P	3	2	R
2019B-D3-R5	2019B-D3	45_P	5	2	R
2019B-D3-R6	2019B-D3	45_P	3	5	R
2019B-D3-R7	2019B-D3	45_P	4	3	R
2019B-D3-R8	2019B-D3	45_P	4	4	R
2019B-D3-R9	2019B-D3	45_P	3	1	R
2019B-D3-R11	2019B-D3	45_P	5	3	R
2019B-D3-R12	2019B-D3	45_P	3	3	R
2019B-D3-R13	2019B-D3	45_P	3	2	R
2019B-D3-R17	2019B-D3	45_P	2	2	R
2019B-D3-R19	2019B-D3	45_P	2	3	R
2019B-D3-R21	2019B-D3	45_P	3	4	R
2019B-D3-R22	2019B-D3	45_P	3	5	R
2019B-D3-R23	2019B-D3	45_P	2	5	R
2019B-D3-R24	2019B-D3	45_P	7	3	R
2019B-D4-R1	2019B-D4	46_P	4	5	L
2019B-D4-R2	2019B-D4	46_P	6	4	L
2019B-D4-R3	2019B-D4	46_P	5	4	L
2019B-D4-R4	2019B-D4	46_P	3	3	L
2019B-D4-R5	2019B-D4	46_P	3	3	L
2019B-D4-R6	2019B-D4	46_P	2	1	L
2019B-D4-R7	2019B-D4	46_P	3	4	L
2019B-D4-R8	2019B-D4	46_P	3	4	L
2019B-D4-R9	2019B-D4	46_P	2	2	L
2019B-D4-R11	2019B-D4	46_P	5	4	L
2019B-D4-R12	2019B-D4	46_P	3	5	L
2019B-D4-R13	2019B-D4	46_P	6	4	L
2019B-D4-R14	2019B-D4	46_P	5	2	L
2019B-D4-R15	2019B-D4	46_P	4	4	L
2019B-D4-R16	2019B-D4	46_P	5	3	L
2019B-D4-R17	2019B-D4	46_P	4	3	L
2019B-D4-R18	2019B-D4	46_P	4	3	L
2019B-D4-R19	2019B-D4	46_P	4	5	L
2019B-D4-R20	2019B-D4	46_P	3	3	L
2019B-D3-R1	2019B-D3	47_P	5	2	R
2019B-D3-R2	2019B-D3	47_P	1	5	R
2019B-D3-R3	2019B-D3	47_P	6	5	R
2019B-D3-R4	2019B-D3	47_P	3	7	R
2019B-D3-R5	2019B-D3	47_P	1	3	R
2019B-D3-R6	2019B-D3	47_P	7	6	R
2019B-D3-R7	2019B-D3	47_P	1	5	R
2019B-D3-R8	2019B-D3	47_P	7	4	R
2019B-D3-R9	2019B-D3	47_P	6	6	R
2019B-D3-R10	2019B-D3	47_P	1	1	R
2019B-D3-R11	2019B-D3	47_P	7	3	R
2019B-D3-R12	2019B-D3	47_P	3	3	R
2019B-D3-R13	2019B-D3	47_P	5	5	R
2019B-D3-R14	2019B-D3	47_P	5	4	R
2019B-D3-R15	2019B-D3	47_P	6	5	R
2019B-D3-R16	2019B-D3	47_P	6	5	R
2019B-D3-R17	2019B-D3	47_P	7	6	R
2019B-D3-R18	2019B-D3	47_P	5	5	R
2019B-D3-R19	2019B-D3	47_P	6	5	R
2019B-D3-R20	2019B-D3	47_P	5	4	R
2019B-D3-R21	2019B-D3	47_P	5	6	R
2019B-D3-R22	2019B-D3	47_P	7	4	R
2019B-D3-R23	2019B-D3	47_P	5	4	R
2019B-D3-R24	2019B-D3	47_P	7	7	R
2019B-D2-R1	2019B-D2	48_P	4	4	L
2019B-D2-R2	2019B-D2	48_P	2	2	L
2019B-D2-R3	2019B-D2	48_P	4	4	L
2019B-D2-R4	2019B-D2	48_P	2	5	L
2019B-D2-R5	2019B-D2	48_P	3	2	L
2019B-D2-R6	2019B-D2	48_P	3	4	L
2019B-D2-R7	2019B-D2	48_P	7	1	L
2019B-D2-R8	2019B-D2	48_P	3	5	L
2019B-D2-R9	2019B-D2	48_P	3	1	L
2019B-D2-R10	2019B-D2	48_P	3	3	L
2019B-D2-R11	2019B-D2	48_P	3	2	L
2019B-D2-R12	2019B-D2	48_P	3	3	L
2019B-D2-R13	2019B-D2	48_P	1	2	L
2019B-D2-R14	2019B-D2	48_P	6	3	L
2019B-D2-R16	2019B-D2	48_P	6	6	L
2019B-D2-R17	2019B-D2	48_P	5	3	L
2019B-D2-R18	2019B-D2	48_P	4	4	L
2019B-D2-R19	2019B-D2	48_P	5	4	L
2019B-D2-R20	2019B-D2	48_P	4	1	L
2019B-D2-R22	2019B-D2	48_P	3	5	L
2019B-D2-R23	2019B-D2	48_P	5	4	L
2020A-D3-2020-01-28-R17	2020A-D3	50_P	3	5	R
2020A-D3-2020-01-28-R2	2020A-D3	50_P	3	6	R
2020A-D3-2020-01-28-R12	2020A-D3	50_P	2	1	R
2020A-D3-2020-01-28-R20	2020A-D3	50_P	3	2	R
2020A-D3-2020-01-28-R11	2020A-D3	50_P	6	3	R
2020A-D3-2020-01-28-R8	2020A-D3	50_P	2	2	R
2020A-D3-2020-01-28-R6	2020A-D3	50_P	6	4	R
2020A-D3-2020-01-28-R14	2020A-D3	50_P	6	5	R
2020A-D3-2020-01-28-R3	2020A-D3	50_P	5	5	R
2020A-D3-2020-01-28-R7	2020A-D3	50_P	7	6	R
2020A-D3-2020-01-28-R5	2020A-D3	50_P	5	4	R
2020A-D3-2020-01-28-R9	2020A-D3	50_P	4	3	R
2020A-D3-2020-01-28-R15	2020A-D3	50_P	5	2	R
2020A-D3-2020-01-28-R19	2020A-D3	50_P	3	6	R
2020A-D3-2020-01-28-R1	2020A-D3	50_P	6	6	R
2020A-D3-2020-01-28-R13	2020A-D3	50_P	5	6	R
2020A-D3-2020-01-28-R10	2020A-D3	50_P	7	5	R
2020A-D3-2020-01-28-R18	2020A-D3	50_P	6	4	R
2020A-D5-2020-01-30-R13	2020A-D5	52_P	3	5	R
2020A-D5-2020-01-30-R21	2020A-D5	52_P	1	5	R
2020A-D5-2020-01-30-R22	2020A-D5	52_P	2	4	R
2020A-D5-2020-01-30-R7	2020A-D5	52_P	3	6	R
2020A-D5-2020-01-30-R16	2020A-D5	52_P	5	5	R
2020A-D5-2020-01-30-R5	2020A-D5	52_P	4	4	R
2020A-D5-2020-01-30-R14	2020A-D5	52_P	2	2	R
2020A-D5-2020-01-30-R8	2020A-D5	52_P	5	6	R
2020A-D5-2020-01-30-R1	2020A-D5	52_P	4	4	R
2020A-D5-2020-01-30-R17	2020A-D5	52_P	2	6	R
2020A-D5-2020-01-30-R12	2020A-D5	52_P	1	6	R
2020A-D5-2020-01-30-R6	2020A-D5	52_P	5	5	R
2020A-D5-2020-01-30-R10	2020A-D5	52_P	4	3	R
2020A-D5-2020-01-30-R18	2020A-D5	52_P	3	6	R
2020A-D5-2020-01-30-R4	2020A-D5	52_P	4	6	R
2020A-D5-2020-01-30-R20	2020A-D5	52_P	2	2	R
2020A-D5-2020-01-30-R9	2020A-D5	52_P	1	6	R
2020A-D5-2020-01-30-R2	2020A-D5	52_P	4	6	R
2020A-D5-2020-01-30-R3	2020A-D5	52_P	2	5	R
2020A-D5-2020-01-30-R11	2020A-D5	52_P	6	5	R
2020A-D5-2020-01-30-R15	2020A-D5	52_P	3	3	R
2020A-D5-2020-01-30-R19	2020A-D5	52_P	1	6	R
2019B-D5-R1	2019B-D5	55_P	2	5	R
2019B-D5-R2	2019B-D5	55_P	2	3	R
2019B-D5-R3	2019B-D5	55_P	4	5	R
2019B-D5-R4	2019B-D5	55_P	7	6	R
2019B-D5-R5	2019B-D5	55_P	2	6	R
2019B-D5-R6	2019B-D5	55_P	4	5	R
2019B-D5-R7	2019B-D5	55_P	4	5	R
2019B-D5-R8	2019B-D5	55_P	5	6	R
2019B-D5-R9	2019B-D5	55_P	3	6	R
2019B-D5-R10	2019B-D5	55_P	1	6	R
2019B-D5-R11	2019B-D5	55_P	4	4	R
2019B-D5-R12	2019B-D5	55_P	3	3	R
2019B-D5-R13	2019B-D5	55_P	3	5	R
2019B-D5-R14	2019B-D5	55_P	5	6	R
2019B-D5-R15	2019B-D5	55_P	3	4	R
2019B-D5-R16	2019B-D5	55_P	1	3	R
2019B-D5-R17	2019B-D5	55_P	3	6	R
2019B-D5-R19	2019B-D5	55_P	4	6	R
2019B-D5-R20	2019B-D5	55_P	6	6	R
2019B-D3-R1	2019B-D3	56_P	5	3	R
2019B-D3-R2	2019B-D3	56_P	6	4	R
2019B-D3-R3	2019B-D3	56_P	4	6	R
2019B-D3-R6	2019B-D3	56_P	4	5	R
2019B-D3-R7	2019B-D3	56_P	4	4	R
2019B-D3-R8	2019B-D3	56_P	5	4	R
2019B-D3-R10	2019B-D3	56_P	6	4	R
2019B-D3-R12	2019B-D3	56_P	5	5	R
2019B-D3-R17	2019B-D3	56_P	5	5	R
2019B-D3-R18	2019B-D3	56_P	5	4	R
2019B-D3-R19	2019B-D3	56_P	4	3	R
2019B-D3-R21	2019B-D3	56_P	4	5	R
2019B-D3-R24	2019B-D3	56_P	4	6	R
2019B-D4-R1	2019B-D4	58_P	3	4	L
2019B-D4-R2	2019B-D4	58_P	4	5	L
2019B-D4-R3	2019B-D4	58_P	6	4	L
2019B-D4-R4	2019B-D4	58_P	4	4	L
2019B-D4-R5	2019B-D4	58_P	3	4	L
2019B-D4-R6	2019B-D4	58_P	3	2	L
2019B-D4-R7	2019B-D4	58_P	4	2	L
2019B-D4-R8	2019B-D4	58_P	3	3	L
2019B-D4-R10	2019B-D4	58_P	2	5	L
2019B-D4-R11	2019B-D4	58_P	4	4	L
2019B-D4-R12	2019B-D4	58_P	3	2	L
2019B-D4-R13	2019B-D4	58_P	4	3	L
2019B-D4-R14	2019B-D4	58_P	3	1	L
2019B-D4-R15	2019B-D4	58_P	3	4	L
2019B-D4-R16	2019B-D4	58_P	2	4	L
2019B-D4-R17	2019B-D4	58_P	4	4	L
2019B-D4-R20	2019B-D4	58_P	4	5	L
2020A-D4-2020-01-29-R18	2020A-D4	60_P	4	4	L
2020A-D4-2020-01-29-R15	2020A-D4	60_P	6	4	L
2020A-D4-2020-01-29-R20	2020A-D4	60_P	4	1	L
2020A-D4-2020-01-29-R1	2020A-D4	60_P	3	4	L
2020A-D4-2020-01-29-R13	2020A-D4	60_P	5	5	L
2020A-D4-2020-01-29-R2	2020A-D4	60_P	2	2	L
2020A-D4-2020-01-29-R17	2020A-D4	60_P	4	5	L
2020A-D4-2020-01-29-R16	2020A-D4	60_P	5	5	L
2020A-D4-2020-01-29-R14	2020A-D4	60_P	3	3	L
2020A-D4-2020-01-29-R22	2020A-D4	60_P	2	2	L
2020A-D4-2020-01-29-R3	2020A-D4	60_P	3	4	L
2020A-D4-2020-01-29-R11	2020A-D4	60_P	6	5	L
2020A-D4-2020-01-29-R19	2020A-D4	60_P	2	4	L
2020A-D4-2020-01-29-R12	2020A-D4	60_P	5	6	L
2020A-D4-2020-01-29-R24	2020A-D4	60_P	4	6	L
2020A-D4-2020-01-29-R5	2020A-D4	60_P	5	6	L
2020A-D4-2020-01-29-R9	2020A-D4	60_P	7	6	L
2020A-D4-2020-01-29-R10	2020A-D4	60_P	6	5	L
2020A-D4-2020-01-29-R26	2020A-D4	60_P	6	2	L
2020A-D4-2020-01-29-R7	2020A-D4	60_P	2	4	L
2020A-D4-2020-01-29-R25	2020A-D4	60_P	5	5	L
2020A-D4-2020-01-29-R6	2020A-D4	60_P	4	6	L
2020A-D4-2020-01-29-R23	2020A-D4	60_P	1	7	L
2020A-D4-2020-01-29-R4	2020A-D4	60_P	3	3	L
2020A-D4-2020-01-29-R8	2020A-D4	60_P	3	4	L
2020A-D4-2020-01-29-R21	2020A-D4	60_P	3	6	L
2020A-D3-2020-01-28-R13	2020A-D3	61_P	4	4	R
2020A-D3-2020-01-28-R7	2020A-D3	61_P	6	6	R
2020A-D3-2020-01-28-R8	2020A-D3	61_P	2	4	R
2020A-D3-2020-01-28-R19	2020A-D3	61_P	7	6	R
2020A-D3-2020-01-28-R9	2020A-D3	61_P	5	3	R
2020A-D3-2020-01-28-R2	2020A-D3	61_P	5	5	R
2020A-D3-2020-01-28-R15	2020A-D3	61_P	3	2	R
2020A-D3-2020-01-28-R4	2020A-D3	61_P	6	5	R
2020A-D3-2020-01-28-R1	2020A-D3	61_P	5	4	R
2020A-D3-2020-01-28-R5	2020A-D3	61_P	5	5	R
2020A-D3-2020-01-28-R10	2020A-D3	61_P	6	2	R
2020A-D3-2020-01-28-R18	2020A-D3	61_P	5	3	R
2020A-D3-2020-01-28-R3	2020A-D3	61_P	6	6	R
2020A-D3-2020-01-28-R11	2020A-D3	61_P	6	3	R
2020A-D3-2020-01-28-R12	2020A-D3	61_P	1	3	R
2020A-D3-2020-01-28-R17	2020A-D3	61_P	5	6	R
2020A-D3-2020-01-28-R6	2020A-D3	61_P	7	5	R
2020A-D3-2020-01-28-R14	2020A-D3	61_P	5	3	R
2020A-D3-2020-01-28-R16	2020A-D3	61_P	5	2	R
2020A-D3-2020-01-28-R20	2020A-D3	61_P	3	1	R
2020A-D5-2020-01-30-R11	2020A-D5	63_P	3	6	R
2020A-D5-2020-01-30-R12	2020A-D5	63_P	1	6	R
2020A-D5-2020-01-30-R16	2020A-D5	63_P	2	5	R
2020A-D5-2020-01-30-R9	2020A-D5	63_P	2	4	R
2020A-D5-2020-01-30-R17	2020A-D5	63_P	2	6	R
2020A-D5-2020-01-30-R14	2020A-D5	63_P	1	1	R
2020A-D5-2020-01-30-R3	2020A-D5	63_P	2	5	R
2020A-D5-2020-01-30-R8	2020A-D5	63_P	6	5	R
2020A-D5-2020-01-30-R19	2020A-D5	63_P	1	5	R
2020A-D5-2020-01-30-R20	2020A-D5	63_P	4	5	R
2020A-D5-2020-01-30-R13	2020A-D5	63_P	6	2	R
2020A-D5-2020-01-30-R21	2020A-D5	63_P	3	4	R
2020A-D5-2020-01-30-R10	2020A-D5	63_P	4	6	R
2020A-D5-2020-01-30-R18	2020A-D5	63_P	2	6	R
2020A-D5-2020-01-30-R7	2020A-D5	63_P	3	5	R
2020A-D5-2020-01-30-R15	2020A-D5	63_P	5	6	R
2020A-D5-2020-01-30-R4	2020A-D5	63_P	4	7	R
2020A-D5-2020-01-30-R1	2020A-D5	63_P	3	5	R
2020A-D5-2020-01-30-R6	2020A-D5	63_P	3	2	R
2020A-D5-2020-01-30-R22	2020A-D5	63_P	4	5	R
2020A-D3-2020-01-28-R10	2020A-D3	66_P	6	3	R
2020A-D3-2020-01-28-R4	2020A-D3	66_P	5	6	R
2020A-D3-2020-01-28-R20	2020A-D3	66_P	3	4	R
2020A-D3-2020-01-28-R2	2020A-D3	66_P	6	4	R
2020A-D3-2020-01-28-R6	2020A-D3	66_P	4	2	R
2020A-D3-2020-01-28-R14	2020A-D3	66_P	4	2	R
2020A-D3-2020-01-28-R19	2020A-D3	66_P	6	6	R
2020A-D3-2020-01-28-R1	2020A-D3	66_P	4	4	R
2020A-D3-2020-01-28-R5	2020A-D3	66_P	5	2	R
2020A-D3-2020-01-28-R17	2020A-D3	66_P	3	3	R
2020A-D3-2020-01-28-R18	2020A-D3	66_P	6	5	R
2020A-D3-2020-01-28-R3	2020A-D3	66_P	4	4	R
2020A-D3-2020-01-28-R8	2020A-D3	66_P	1	3	R
2020A-D3-2020-01-28-R13	2020A-D3	66_P	4	5	R
2020A-D3-2020-01-28-R11	2020A-D3	66_P	5	2	R
2020A-D3-2020-01-28-R7	2020A-D3	66_P	4	3	R
2020A-D3-2020-01-28-R16	2020A-D3	66_P	4	3	R
2020A-D3-2020-01-28-R15	2020A-D3	66_P	2	4	R
2020A-D3-2020-01-28-R12	2020A-D3	66_P	2	2	R
2020A-D3-2020-01-28-R9	2020A-D3	66_P	3	6	R
2019B-D1-R1	2019B-D1	67_P	4	4	R
2019B-D1-R2	2019B-D1	67_P	3	3	R
2019B-D1-R3	2019B-D1	67_P	1	1	R
2019B-D1-R4	2019B-D1	67_P	4	4	R
2019B-D1-R5	2019B-D1	67_P	3	2	R
2019B-D1-R6	2019B-D1	67_P	4	3	R
2019B-D1-R7	2019B-D1	67_P	4	5	R
2019B-D1-R8	2019B-D1	67_P	6	6	R
2019B-D1-R9	2019B-D1	67_P	6	3	R
2019B-D1-R10	2019B-D1	67_P	6	3	R
2019B-D1-R11	2019B-D1	67_P	5	3	R
2019B-D1-R12	2019B-D1	67_P	7	1	R
2019B-D1-R13	2019B-D1	67_P	4	2	R
2019B-D1-R14	2019B-D1	67_P	2	4	R
2019B-D1-R15	2019B-D1	67_P	6	1	R
2019B-D1-R16	2019B-D1	67_P	6	3	R
2019B-D1-R17	2019B-D1	67_P	5	4	R
2019B-D1-R18	2019B-D1	67_P	4	2	R
2019B-D1-R19	2019B-D1	67_P	5	2	R
2019B-D1-R21	2019B-D1	67_P	6	1	R

## Sheet: Perceived_char_mean
target_triad	attractivenss_partner_mean	attractivenss_father_mean	masculinity_parnter_mean	masculinity_father_mean	similarity_partner_mean_position
01	3.91667	4.83333	3.66667	4.22222	1.875
02	2.73684	2.1	3.57895	3.65	2.15
03	4.52381	4.17647	4.28571	3.64706	1.86364
04	4.53333	3.77778	3.6	3.16667	1.68182
05	3.71429	2.95238	3.14286	4.38095	2.90909
06	NA	NA	NA	NA	1.48
07	3.69565	2.25	4.78261	5.75	1.54167
08	NA	NA	NA	NA	2.95833
09	NA	NA	NA	NA	1.12
10	NA	NA	NA	NA	1.80769
11	NA	NA	NA	NA	2.26923
12	NA	NA	NA	NA	1.64
13	4.11765	3.75	4	3.6	1.55
14	4	4.42857	4	3.71429	2.28
15	3.66667	3.72	4.28571	4.16	2.08
16	4.05556	4.78947	4.5	4.10526	1.7
17	3.72222	4.42857	4.22222	3.5	1.8
18	4.38889	4.52632	3.44444	3.94737	1.75
19	3.82353	4.27778	3.82353	3.26316	1.85
20	NA	NA	NA	NA	2.03846
21	4.36842	4.61111	4.26316	3.72222	1.9
22	NA	NA	NA	NA	2.77778
23	NA	NA	NA	NA	2.88
24	NA	NA	NA	NA	1.81481
25	4.05556	3.65385	4.11111	4.30769	2.48
26	NA	NA	NA	NA	2
27	NA	NA	NA	NA	2.55556
28	3.77778	3.64706	3.55556	3.76471	2.27273
29	3.31579	4.11765	3.78947	4.11765	2.55
30	4	4.68421	4.78261	4.15789	1.96
31	1.68182	4.22222	3.86364	3.55556	3.81818
32	3.95	3.76471	4.2	3.76471	2.35
33	2.45	1.6	4.95	5.35	1.3
34	4.18182	4.47619	3.18182	3.33333	2.66667
35	NA	NA	NA	NA	2.84615
36	4.9375	2.75	3.9375	5.45	2.68182
37	4.33333	4	3.61111	3.66667	2.04167
38	NA	NA	NA	NA	1.84615
39	3.77778	4.26087	3.61111	3.375	2.08333
40	3.26087	3.375	4.13043	4.08333	2.125
41	NA	NA	NA	NA	1.61538
42	NA	NA	NA	NA	1.88889
43	4.05263	4.27778	3.68421	4.27778	2.36
44	3.22727	3.6	4.77273	3.13333	1.7619
45	3.33333	3.43478	3.33333	5.08696	2.33333
46	3.89474	3.52941	3.47368	3.35294	2.35
47	4.875	3.94118	4.58333	4.11765	2.75
48	3.7619	4.21053	3.2381	4.10526	1.95833
49	NA	NA	NA	NA	2.125
50	4.66667	4.15789	4.16667	4.63158	1.95
51	NA	NA	NA	NA	3.26923
52	3.04545	3.47619	4.81818	4.42857	1.72727
53	NA	NA	NA	NA	2.08333
54	NA	NA	NA	NA	2.56
55	3.47368	2.7	5.05263	5.6	1.5
56	4.69231	3.25	4.46154	4.25	2.33333
57	NA	NA	NA	NA	2.6
58	3.47059	5.3	3.52941	3.35	2.35
59	NA	NA	NA	NA	2.07692
60	3.96154	3.28	4.38462	4.24	2.48
61	4.85	4.5	3.9	3.75	2.55
62	NA	NA	NA	NA	2.16
63	3.05	5	4.8	3.63636	2.13636
64	NA	NA	NA	NA	1.96
65	NA	NA	NA	NA	2.86957
66	4.05	4.29412	3.65	4	2.2
67	4.55	4.25	2.85	3.8125	2.27273

## Sheet: Soc_dem_Fathers
ID_Father	age	current_residence_size	education	employment	marital_status	diet_smoking	diet_food	diet_alcohol	diet_cosmetic
01_F	52	< 10 000	High school	Employed	Married	0	0	0	0
02_F	47	< 10 000	High school	Employed	Married	0	0	0	1
03_F	47	< 10 000	High school	Studuji	Married	0	0	0	0
04_F	52	10 000 ̶ 49 999	University	Employed	Married	0	0	0	0
05_F	59	< 10 000	High school	Employed	Married	0	0	0	0
06_F	50	50 000 ̶ 99 999	High school	Employed	Married	0	0	0	1
07_F	63	> 1 million	High school	Employed	Married	0	0	1	0
08_F	54	> 1 million	University	Employed	Married	0	0	0	0
09_F	52	10 000 ̶ 49 999	High school	Employed	Married	0	0	0	0
10_F	52	> 1 million	High school	Employed	Married	0	0	0	0
11_F	54	< 10 000	High school	Employed	Married	0	0	0	0
12_F	51	< 10 000	High school	Employed and Student	Married	0	0	0	0
13_F	50	< 10 000	University	Employed	Married	0	1	0	1
14_F	57	< 10 000	High school	Employed	Married	0	0	0	0
15_F	50	10 000 ̶ 49 999	High school	Employed	Married	0	1	1	0
16_F	58	< 10 000	High school	Employed	Married	0	0	1	0
17_F	45	10 000 ̶ 49 999	High school	Employed	Divorced	0	0	0	0
18_F	73	< 10 000	High school	Retired	Married	0	0	0	0
19_F	41	10 000 ̶ 49 999	High school	Employed	Married	0	0	1	1
20_F	46	< 10 000	High school	Employed	Divorced	0	0	0	0
21_F	48	< 10 000	High school	Employed	Married	0	0	0	0
22_F	51	< 10 000	High school	Unemployed	Divorced	0	0	0	0
23_F	48	< 10 000	High school	Employed	Married	0	0	0	0
24_F	57	< 10 000	University	Employed	Married	0	0	0	0
25_F	48	< 10 000	High school	Employed	Married	0	0	0	0
26_F	65	50 000 ̶ 99 999	University	Employed	Married	0	0	1	1
27_F	64	10 000 ̶ 49 999	High school	Retired	Married	0	0	0	0
28_F	53	< 10 000	High school	Employed	Divorced	0	0	0	0
29_F	39	> 1 million	High school	Employed	Married	0	0	0	0
30_F	56	< 10 000	High school	Employed	Divorced	0	0	0	0
31_F	65	50 000 ̶ 99 999	High school	Retired	Married	1	0	0	1
32_F	49	< 10 000	University	Employed	Married	0	0	0	0
33_F	42	< 10 000	High school	Employed	Married	0	0	0	0
34_F	48	10 000 ̶ 49 999	High school	Employed	Married	0	0	1	0
35_F	53	< 10 000	High school	Employed	Married	0	0	0	0
36_F	59	< 10 000	High school	Employed	Married	0	0	0	0
37_F	50	< 10 000	University	Employed	Married	0	0	0	0
38_F	58	< 10 000	High school	Employed	Married	0	1	0	0
39_F	49	< 10 000	High school	Employed	Married	0	0	0	0
40_F	45	< 10 000	High school	Employed	Married	0	0	0	0
41_F	51	> 1 million	University	Employed	Married	0	0	0	0
42_F	57	> 1 million	University	Employed	Married	0	0	0	0
43_F	44	< 10 000	High school	Employed	Married	0	0	0	0
44_F	56	< 10 000	High school	Employed	Married	0	0	0	0
45_F	47	< 10 000	High school	Employed	Married	0	1	0	1
46_F	43	< 10 000	High school	Employed	Married	0	0	0	0
47_F	52	< 10 000	High school	Employed	Married	0	0	0	0
48_F	47	< 10 000	University	Employed	Married	0	0	0	0
49_F	59	< 10 000	University	Employed	Married	0	0	0	0
50_F	52	10 000 ̶ 49 999	High school	Employed	Married	0	0	0	0
51_F	47	50 000 ̶ 99 999	High school	Employed	Married	0	0	0	0
52_F	57	> 1 million	University	Employed	Married	0	0	0	0
53_F	55	100 000 ̶ 1 million	University	Employed	Married	0	0	0	0
54_F	46	10 000 ̶ 49 999	High school	Employed	Married	0	0	0	0
55_F	50	< 10 000	High school	Employed	Married	1	0	0	0
56_F	55	< 10 000	High school	Employed	Married	0	0	0	0
57_F	54	< 10 000	High school	Employed	Married	0	0	0	0
58_F	43	< 10 000	High school	Employed	Married	0	0	1	0
59_F	46	< 10 000	University	Employed	Married	0	1	0	0
60_F	49	< 10 000	High school	Employed	Married	0	0	0	0
61_F	45	50 000 ̶ 99 999	High school	Employed	Married	0	0	0	0
62_F	55	< 10 000	High school	Retired	Married	0	0	0	1
63_F	54	> 1 million	University	Employed	Married	0	0	0	0
64_F	50	10 000 ̶ 49 999	High school	Employed	Married	0	0	0	1
65_F	44	< 10 000	High school	Employed	Married	0	0	0	0
66_F	54	< 10 000	University	Employed	Divorced	0	0	0	0
67_F	46	< 10 000	High school	Unemployed	Married	0	0	0	0

## Sheet: Soc_dem_Partners
ID_Partner	age	current_residence_size	education	employment	marital_status	diet_smoking	diet_food	diet_alcohol	diet_cosmetic
01_P	28	> 1 million	University	Employed	Dating	0	0	0	0
02_P	23	< 10 000	University	Student	Dating	0	0	1	1
03_P	23	> 1 million	University	Employed and Student	Dating	0	0	0	0
04_P	26	10 000 ̶ 49 999	University	Employed	Dating	0	0	1	0
05_P	37	> 1 million	University	Employed	Married	0	0	0	0
06_P	21	> 1 million	High school	Employed	Dating	0	0	0	0
07_P	31	> 1 million	University	Employed	Dating	1	0	0	0
08_P	25	> 1 million	University	Employed and Student	Dating	0	0	0	0
09_P	22	> 1 million	High school	Student	Dating	1	0	0	0
10_P	21	> 1 million	High school	Student	Dating	0	0	0	0
11_P	22	< 10 000	High school	Employed and Student	Married	0	1	0	0
12_P	32	< 10 000	High school	Employed	Dating	0	0	1	0
13_P	26	< 10 000	University	Employed	Dating	0	0	1	0
14_P	29	10 000 ̶ 49 999	High school	Employed	Dating	0	0	0	0
15_P	24	> 1 million	High school	Student	Dating	0	0	0	0
16_P	28	< 10 000	High school	Employed	Dating	0	0	0	0
17_P	19	100 000 ̶ 1 million	High school	Employed and Student	Dating	0	0	0	1
18_P	25	< 10 000	University	Employed	Dating	0	0	0	1
19_P	29	10 000 ̶ 49 999	University	Employed	Dating	0	0	0	1
20_P	21	< 10 000	High school	Student	Dating	0	1	0	1
21_P	25	< 10 000	High school	Employed and Student	Dating	0	0	0	0
22_P	31	> 1 million	University	Employed and Student	Married	0	0	0	0
23_P	26	> 1 million	University	Employed and Student	Dating	0	0	0	0
24_P	25	< 10 000	University	Employed	Dating	0	0	0	0
25_P	24	< 10 000	High school	Student	Dating	0	0	0	0
26_P	31	> 1 million	High school	Employed	Married	0	0	0	0
27_P	27	> 1 million	University	Employed	Dating	0	0	0	0
28_P	26	10 000 ̶ 49 999	University	Employed	Dating	0	0	0	0
29_P	21	< 10 000	High school	Student	Dating	0	0	0	0
30_P	31	10 000 ̶ 49 999	University	Employed	Dating	0	0	0	0
31_P	27	50 000 ̶ 99 999	University	Employed	Dating	0	0	0	0
32_P	22	50 000 ̶ 99 999	High school	Student	Dating	0	0	0	0
33_P	24	100 000 ̶ 1 million	University	Student	Dating	0	0	0	0
34_P	31	< 10 000	High school	Employed	Married	0	0	0	0
35_P	26	100 000 ̶ 1 million	High school	Employed	Dating	0	0	0	0
36_P	37	< 10 000	University	Employed	Married	0	1	1	1
37_P	30	50 000 ̶ 99 999	University	Employed	Married	0	0	0	0
38_P	27	100 000 ̶ 1 million	University	Student	Dating	0	0	0	0
39_P	35	< 10 000	High school	Employed	Dating	0	0	0	0
40_P	23	100 000 ̶ 1 million	High school	Employed	Dating	0	0	0	0
41_P	30	> 1 million	University	Employed	Married	0	0	0	0
42_P	30	> 1 million	University	Employed	Dating	0	0	0	0
43_P	23	> 1 million	High school	Employed and Student	Dating	0	1	0	1
44_P	32	> 1 million	University	Employed	Married	0	0	0	0
45_P	31	50 000 ̶ 99 999	Primary	Employed	Dating	0	1	0	1
46_P	22	< 10 000	High school	Student	Dating	0	1	0	0
47_P	32	< 10 000	High school	Employed	Married	0	0	0	1
48_P	23	100 000 ̶ 1 million	High school	Student	Married	0	0	0	0
49_P	28	> 1 million	University	Employed	Dating	0	0	0	0
50_P	23	< 10 000	High school	Employed	Married	0	1	0	0
51_P	23	> 1 million	High school	Student	Dating	0	0	0	0
52_P	29	10 000 ̶ 49 999	Primary	Employed	Dating	0	0	0	0
53_P	37	100 000 ̶ 1 million	University	Employed	Married	0	0	0	0
54_P	23	100 000 ̶ 1 million	High school	Employed	Dating	0	0	0	0
55_P	25	50 000 ̶ 99 999	High school	Employed and Student	Dating	0	0	0	0
56_P	23	< 10 000	High school	Employed	Married	0	0	0	0
57_P	29	> 1 million	University	Employed	Dating	0	0	0	0
58_P	32	< 10 000	High school	Employed	Married	0	0	0	1
59_P	25	> 1 million	University	Employed and Student	Married	0	0	0	0
60_P	21	10 000 ̶ 49 999	High school	Student	Dating	0	0	0	0
61_P	20	50 000 ̶ 99 999	High school	Student	Dating	1	0	0	0
62_P	28	100 000 ̶ 1 million	University	Employed	Married	0	0	1	1
63_P	29	> 1 million	High school	Employed	Dating	0	0	0	0
64_P	23	50 000 ̶ 99 999	High school	Employed and Student	Dating	1	0	0	0
65_P	23	> 1 million	High school	Student	Dating	0	0	0	0
66_P	33	> 1 million	High school	Employed	Dating	0	0	0	0
67_P	29	< 10 000	High school	Employed	Married	0	0	0	0

## Sheet: Soc_dem_Women
ID_Woman	age	current_residence_size	education	employment	marital_status	relationship_length_months	children_with_c_partner	cohabitation_with_partner	Cohabitation_with_father	overall_relationship_with_father	EMBU_O_1	EMBU_O_2	EMBU_O_3	EMBU_O_4	EMBU_O_5	EMBU_O_6	EMBU_O_7	EMBU_O_8	EMBU_O_9	EMBU_O_10	EMBU_O_11	EMBU_O_12	EMBU_O_13	EMBU_O_14	EMBU_O_15	EMBU_O_16	EMBU_O_17	EMBU_O_17	EMBU_O_18	EMBU_O_19	EMBU_O_20	EMBU_O_21	EMBU_O_22	EMBU_O_23	ECRRS_O_1	ECRRS_O_2	ECRRS_O_3	ECRRS_O_4	ECRRS_O_5	ECRRS_O_6	ECRRS_O_7	ECRRS_O_8	ECRRS_O_9	ECRRS_O_10	ECRRS_O_Avoid	ECRRS_O_Anxiety	EMBU_O_Rejection	EMBU_O_EmotionalWarmth	EMBU_O_Protection
01_W	21	> 1 million	High school	Employed and Student	Dating	15	0	0	1	7	2	4	1	2	2	3	1	2	3	2	1	4	1	3	1	1	4	4	1	2	2	2	1	4	2	3	5	5	6	3	1	1	1	2	26	3	10	20	13
02_W	23	100 000 ̶ 1 million	University	Student	Dating	39	0	1	0	7	1	2	1	1	1	3	1	2	2	1	1	3	1	2	1	1	2	2	1	4	2	1	1	3	4	5	5	5	3	3	1	5	2	4	19	8	7	17	13
03_W	21	> 1 million	High school	Student	Dating	10	0	0	1	6	1	2	1	1	1	1	1	1	1	1	1	2	1	3	1	1	1	1	1	3	1	1	1	3	3	5	5	7	6	5	1	1	1	1	23	3	7	14	12
04_W	25	10 000 ̶ 49 999	University	Employed	Dating	100	0	0	1	7	1	3	1	1	2	4	1	1	3	1	1	3	1	4	1	1	3	3	1	4	1	1	1	4	4	5	6	7	4	4	1	1	1	1	18	3	7	22	11
05_W	35	> 1 million	University	Unemployed	Married	24	1	1	0	5	2	2	3	2	2	4	1	2	3	2	2	3	1	3	1	1	2	2	2	3	2	1	2	3	3	3	7	7	5	2	1	1	1	1	19	3	9	18	20
06_W	21	50 000 ̶ 99 999	High school	Employed and Student	Dating	18	0	0	1	5	2	3	1	2	1	1	1	1	2	1	1	2	1	3	3	2	4	4	1	3	3	2	2	3	2	1	1	5	7	5	3	2	1	3	35	6	13	15	12
07_W	29	> 1 million	High school	Employed and Student	Dating	49	0	1	0	6	1	2	1	3	2	4	1	2	3	2	2	3	1	2	2	2	3	3	1	2	4	3	1	3	5	5	7	7	3	1	1	1	1	1	12	3	13	16	17
08_W	24	> 1 million	University	Employed and Student	Dating	110	0	1	0	5	3	3	2	1	1	4	1	1	3	1	3	4	1	4	1	1	3	3	1	2	2	1	1	4	2	5	7	7	2	5	1	1	1	1	18	3	9	21	14
09_W	24	> 1 million	High school	Student	Dating	22	0	1	0	7	2	4	1	1	1	2	1	1	3	1	1	4	1	4	1	1	3	3	2	4	1	1	1	3	3	7	7	6	6	1	1	1	1	1	16	3	8	21	11
10_W	23	> 1 million	University	Student	Dating	71	0	0	1	6	2	4	2	1	1	2	2	1	3	2	1	3	1	4	2	2	4	4	1	3	1	2	1	4	4	4	4	3	5	4	4	3	5	2	26	12	12	20	11
11_W	25	> 1 million	University	Student	Married	60	0	1	0	7	1	3	1	1	1	3	1	1	3	1	1	4	1	4		1	4	4	1	4	2	1	1	4	5	5	7	6	3	2	1	1	1	1	14	3	7.29688	22	10
12_W	28	< 10 000	University	Parental leave	Dating	75	1	1	0	6	2	4	2	1	3	4	1	2	4	2	2	3	1	4	1	2	3	3	2	4	3	1	2	4	6	7	7	7	6	2	1	2	1	1	13	4	9	23	20
13_W	24	< 10 000	University	Student	Dating	126	0	0	1	7	2	4	1	1	2	1	1	1	3	3	1	4	1	4	1	1	3	3	2	3	2	1	1	4	5	7	7	7	2	1	1	1	1	1	9	3	8	20	15
14_W	26	10 000 ̶ 49 999	High school	Employed	Dating	127	0	1	0	5	2	3	2	2	3	3	1	1	4	2	1	2	1	4	1	1	4	4	1	2	3	2	1	4	2	3	5	7	7	5	1	1	1	1	27	3	10	18	15
15_W	21	> 1 million	High school	Student	Dating	8	0	0	0	5	2	2	1	2	1	3	2	1	2	2	1	2	1	2	2	1	4	4	1	2	2	1	1	2	2	5	4	4	6	5	1	1	4	5	28	6	11	13	11
16_W	30	< 10 000	University	Employed	Dating	11	0	0	1	5	3	2	2	4	3	2	4	2	4	3	1	2	3	1	3	4	1	1	4	1	4	3	4	3	2	2	3	4	7	6	3	4	5	5	34	12	24	11	27
17_W	19	50 000 ̶ 99 999	High school	Student	Dating	46	0	1	0	7	1	3	1	1	1	3	1	1	3	1	3	3	1	3	1	1	2	2	1	4	2	1	1	4	3	5	7	6	6	3	1	1	1	7	20	3	7	20	14
18_W	24	< 10 000	University	Student	Dating	98	0	1	0	6	2	4	1	2	2	3	1	4	3	2	4	3	1	3	1	2	1	1	2	2	2	1	1	4	2	4	4	7	5	6	2	1	1	2	26	4	10	19	22
19_W	20	10 000 ̶ 49 999	High school	Employed and Student	Dating	26	0	0	1	7	1	4	4	2	2	3	1	3	3	1	2	3	1	4	1	1	2	2	2	4	2	2	2	3	1	1	1	7	7	7	1	1	1	7	36	3	9	21	21
20_W	23	< 10 000	University	Employed and Student	Dating	14	0	0	1	7	1	3	1	2	2	2	1	1	2	1	1	4	1	3	1	1	4	4	1	4	1	1	1	4	6	6	6	7	2	1	1	1	1	1	10	3	8	20	10
21_W	22	< 10 000	High school	Employed and Student	Dating	27	0	1	0	7	2	3	2	1	1	4	1	1	3	2	1	4	1	4	1	1	4	4	1	3	3	1	1	4	5	5	7	7	6	5	1	1	1	1	19	3	8	22	13
22_W	25	> 1 million	University	Student	Married	43	0	1	0	6	2	3	1	1	2	2	1	1	3	1	1	3	1	4	1	1	4	4	1	4	1	1	1	4	1	2	6	3	7	4	4	1	1	4	31	6	8	20	10
23_W	22	< 10 000	High school	Employed and Student	Dating	50	0	1	0	6	2	3	2	1	1	4	1	2	3	1	2	4	1	3	2	1	2	2	1	3	2	1	1	4	5	7	7	7	4	4	1	1	1	1	14	3	9	21	15
24_W	26	< 10 000	High school	Employed and Student	Dating	51	0	1	1	7	2	4	1	1	2	4	1	2	3	2	2	4	1	4	1	1	3	3	2	4	2	1	1	4	6	7	7	7	4	2	1	1	1	1	11	3	8	24	16
25_W	23	< 10 000	University	Student	Dating	74	0	0	1	7	1	4	3	1	3	4	1	3	3	3	2	4	1	4	1	1	1	1	2	4	2	1	1	4	7	7	7	7	1	1	1	1	1	1	6	3	7	24	23
26_W	32	> 1 million	University	Employed	Married	54	0	1	0	4	3	4	2	2	3	4	2	3	4	3	3	3	1	4	2	2	1	1	2	3	4	1	2	4	5	5	7	6	6	5	1	1	1	1	20	3	13	22	26
27_W	25	> 1 million	University	Employed and Student	Dating	92	0	1	0	6	2	2	1	2	2	2	1	2	1	2	2	2	1	3	1	2	3	3	1	3	2	1	1	4	5	5	6	7	3	2	1	1	1	1	14	3	10	16	15
28_W	26	10 000 ̶ 49 999	University	Employed	Dating	37	0	1	0	5	2	2	1	2	1	2	1	2	1	3	2	2	1	4	1	1	3	3	2	3	4	2	1	4	7	7	7	7	2	1	1	1	1	1	7	3	10	17	18
29_W	20	> 1 million	High school	Student	Dating	43	0	0	1	6	1	3	2	1	2	3	1	2	2	2	3	4	1	3	2	2	2	2	2	3	2	1	2	4	4	3	6	7	5	3	1	1	1	1	20	3	9	20	20
30_W	29	10 000 ̶ 49 999	University	Unemployed	Dating	12	0	0	0	6	2	2	2	2	2	4	1	2	3	2	1	3	1	3	1	1	3	3	2	4	2	2	1	2	3	3	5	3	7	5	1	1	1	1	30	3	10	18	16
31_W	24	50 000 ̶ 99 999	University	Employed	Dating	NA	0	1	0	NA	NA	NA	NA	NA	NA	NA	NA	NA	NA	NA	NA	NA	NA	NA	NA	NA	NA	NA	NA	NA	NA	NA	NA	NA	NA	NA	NA	NA	NA	NA	NA	NA	NA	NA	NA	NA	NA	NA	NA
32_W	22	50 000 ̶ 99 999	High school	Employed and Student	Dating	113	0	1	1	6	1	2	1	1	2	4	1	2	3	1	1	2	1	2	1	1	1	1	1	2	1	1	1	2	3	5	5	6	4	5	3	2	2	2	22	7	7	14	14
33_W	20	100 000 ̶ 1 million	High school	Student	Dating	64	0	1	0	6	3	3	1	1	2	3	1	1	3	3	1	2	1	2	1	1	3	3	1	2	2	1	1	4	3	5	6	3	7	5	1	1	1	1	27	3	9	16	14
34_W	24	10 000 ̶ 49 999	High school	Employed	Married	88	1	1	0	5	2	2	1	1	2	3	1	2	2	2	2	2	1	2		2	1	1	2	2	3	2	3	3	2	2	4	3	7	7	5	5	6	4	35	16	10.2969	14	21
35_W	24	50 000 ̶ 99 999	University	Student	Dating	34	0	0	1	6	2	2	2	1	2	4	2	2	1	1	1	3	1	3	1	1	3	3	2	2	2	1	1	3	2	2	6	7	6	6	1	1	2	1	27	4	9	17	15
36_W	31	< 10 000	University	Unemployed	Married	225	1	1	0	6	1	4	1	2	2	4	1	2	4	2	2	4	1	3	1	1	2	2	3	4	3	1	1	4	7	6	7	7	2	1	6	1	1	1	8	8	8	23	19
37_W	28	50 000 ̶ 99 999	University	Unemployed	Married	141	1	1	0	6	2	2	1	1	2	3	1	1	3	1	1	2	2	2	1	2	3	3	1	3	2	1	1	3	2	3	6	7	6	6	1	1	2	2	26	4	10	15	12
38_W	26	100 000 ̶ 1 million	University	Student	Dating	28	0	1	0	7	2	3	2	2	3	2	1	1	2	1	1	2	1	3	1	1	3	3	1	3	2	1	1	3	4	3	5	7	2	3	1	1	1	2	18	3	9	16	14
39_W	25	< 10 000	University	Employed	Dating	83	0	1	0	7	1	4	1	1	1	1	1	2	4	1	2	3	1	3	1	1	1	1	1	3	2	1	1	3	3	5	7	7	3	1	2	1	1	1	14	4	7	17	15
40_W	21	100 000 ̶ 1 million	High school	Employed	Dating	9	0	1	0	6	2	2	1	1	1	2	1	3	1	1	3	2	1	2	2	1	1	1	1	2	3	1	1	2	1	1	6	6	7	7	1	1	1	1	32	3	9	12	18
41_W	24	> 1 million	University	Student	Married	52	1	1	0	7	2	3	2	2	2	4	2	3	4	3	2	3	1	3	2	2	2	2	2	3	4	2	3	4	6	5	7	7	5	4	1	1	1	1	16	3	13	20	24
42_W	24	> 1 million	University	Employed	Dating	8	0	1	0	6	3	1	1	1	1	3	1	1	4	2	1	3	1	1	1	1	4	4	1	3	2	1	1	2	6	5	4	6	3	2	1	1	1	1	16	3	9	13	11
43_W	22	> 1 million	High school	Employed and Student	Dating	43	0	1	0	4	4	2	4	3	1	3	2	1	3	3	3	2	1	2	1	2	4	4	1	1	2	3	1	3	5	6	5	3	5	5	3	2	1	3	23	6	16	13	17
44_W	27	> 1 million	University	Employed	Married	78	0	1	0	7	1	2	1	1	2	2	1	3	2	1	1	4	1	4	1	1	3	3	1	4	2	1	1	4	3	1	6	7	4	2	1	1	1	7	21	3	7	20	14
45_W	21	< 10 000	High school	Student	Dating	65	0	1	0	4	3	2	1	1	2	3	2	4	3	4	3	2	2	2	2	2	1	1	2	2	4	3	1	2	4	3	7	6	6	5	4	5	4	1	23	13	15	13	25
46_W	20	< 10 000	High school	Student	Dating	51	0	0	1	7	1	4	2	1	2	4	1	2	2	2	1	4	1	4	1	1	2	2	2	4	2	1	1	4	4	5	5	5	5	4	1	1	1	1	22	3	7	24	17
47_W	30	< 10 000	University	Unemployed	Married	70	1	1	0	5	1	2	1	1	2	2	1	1	3	1	2	2	1	3	4	1	2	2	1	2	2	1	1	2	5	5	6	5	4	4	1	1	1	1	19	3	10	13	14
48_W	23	100 000 ̶ 1 million	University	Employed and Student	Married	79	0	1	0	5	3	2	1	3	3	1	2	2	2	3	1	2	1	3	2	1	2	2	1	3	4	2	1	2	5	5	4	7	7	6	4	4	3	2	24	11	14	13	19
49_W	26	> 1 million	University	Unemployed	Dating	49	0	1	0	7	1	3	1	1	1	2	1	1	2	1	1	2	1	3	1	1	3	3	1	3	2	1	2	3	3	2	4	4	6	4	2	3	2	3	29	7	7	16	12
50_W	24	< 10 000	High school	Unemployed	Married	24	1	1	0	7	2	4	2	2	2	4	1	2	4	2	2	4	1	4	1	1	2	2	2	4	4	1	2	4	5	6	7	7	1	1	2	1	1	1	9	4	9	24	21
51_W	23	100 000 ̶ 1 million	High school	Student	Dating	41	0	0	0	7	2	4	1	1	1	2	1	1	3	1	1	3	1	2	1	1	4	4	1	3	1	1	1	4	3	5	5	3	6	4	1	4	3	2	26	8	8	18	9
52_W	26	> 1 million	University	Employed and Student	Dating	17	0	0	1	7	2	2	3	1	3	3	3	3	2	3	1	2	1	4	1	2	1	1	2	3	3	1	1	4	3	3	7	5	6	5	1	1	1	1	25	3	11	18	23
53_W	28	100 000 ̶ 1 million	High school	Student	Married	98	0	1	0	7	2	2	1	1	1	4	1	3	4	1	1	4	4	4	1	1	1	1	4	4	4	2	1	4	1	1	5	6	1	3	1	6	4	4	23	11	12	22	20
54_W	22	100 000 ̶ 1 million	High school	Student	Dating	43	0	1	0	7	1	4	1	1	1	4	1	1	4	1	1	4	1	4	1	1	4	4	1	4	3	1	1	4	2	3	7	6	7	7	1	1	1	1	28	3	7	24	11
55_W	20	10 000 ̶ 49 999	High school	Student	Dating	60	0	0	1	7	2	4	1	1	2	4	1	1	3	1	1	4	1	4	1	1	3	3	1	4	3	1	1	4	6	7	7	7	4	4	1	1	1	1	13	3	8	24	13
56_W	21	< 10 000	High school	Unemployed	Married	97	1	1	0	6	1	3	1	1	1	2	1	1	3	2	1	4	1	4	2	1	1	1	1	3	1	1	1	3	5	5	6	6	1	1	1	1	1	1	12	3	8	19	13
57_W	23	> 1 million	University	Student	Dating	38	0	1	0	6	2	3	1	1	1	4	1	1	2	3	1	2	1	4	1	1	3	3	1	2	4	1	1	3	2	2	5	7	6	4	1	1	1	1	26	3	8	18	15
58_W	23	< 10 000	University	Parental leave	Married	92	1	1	0	7	2	3	2	1	2	2	1	2	3	1	2	2	1	3	1	1	2	2	2	3	4	1	3	4	6	7	7	7	2	1	1	1	1	1	8	3	8	17	21
59_W	23	> 1 million	University	Student	Married	26	0	1	0	6	2	3	1	1	1	3	1	1	3	2	1	2	1	2	1	1	3	3	1	3	2	1	1	3	3	5	5	4	5	4	1	1	1	2	24	3	8	16	12
60_W	22	< 10 000	High school	Student	Dating	10	0	0	1	7	2	4	1	3	4	4	1	2	3	1	2	3	1	4	1	1	1	1	2	4	2	1	1	4	5	5	7	7	4	5	1	1	1	7	17	3	10	23	19
61_W	19	50 000 ̶ 99 999	High school	Student	Dating	20	0	0	1	7	2	4	2	1	1	4	1	1	4	2	1	3	1	4	1	1	3	3	2	4	2	1	1	4	5	5	4	7	4	4	1	1	1	1	19	3	8	23	14
62_W	28	100 000 ̶ 1 million	University	Parental leave	Married	79	1	1	0	6	2	3	2	1	2	4	1	2	4	2	1	4	1	3	1	1	2	2	2	4	2	1	2	4	3	5	6	7	5	6	1	1	1	1	22	3	8	22	18
63_W	29	> 1 million	University	Employed	Dating	233	0	1	0	5	2	2	1	2	2	3	1	1	3	1	1	2	1	2	2	1	3	3	1	2	2	3	1	4	3	5	6	6	5	6	2	1	1	1	23	4	12	15	12
64_W	23	50 000 ̶ 99 999	University	Employed	Dating	48	0	1	0	6	2	2	2	1	2	3	2	1	3	2	1	2	1	2	1	2	2	2	2	2	2	1	1	3	5	5	5	5	4	4	1	1	1	1	20	3	10	14	16
65_W	20	> 1 million	High school	Student	Dating	85	0	1	0	4	3	3	1	2	1	1	1	2	3	1	1	1	1	1	1	1	3	3	1	1	3	1	1	3	1	1	1	4	6	7	1	1	1	1	38	3	10	10	13
66_W	25	> 1 million	University	Employed and Student	Dating	14	0	1	1	4	2	3	1	1	3	3	1	2	3	3	4	3	1	3	1	2	3	3	1	4	3	1	1	3	7	7	7	7	5	1	4	1	1	1	10	6	9	19	20
67_W	24	< 10 000	University	Employed and Student	Married	NA	1	1	0	6	2	3	2	2	2		1	2	4	2	2	3	1	3	1	1	2	2	2	3	3	1	1	3	5	6	6	6	4	4	5	2	2	1	17	9	9	17.9538	19
